# Supplementary material for: Integrative oncogene-dependency mapping identifies RIT1 vulnerabilities and synergies in lung cancer
Source: PubMed Central journal article supplement (PMC8352964; doi:10.1038/s41467-021-24841-y), 2021-08-09
Supplement: 41467_2021_24841_MOESM1_ESM.pdf [file 41467_2021_24841_MOESM1_ESM.pdf]

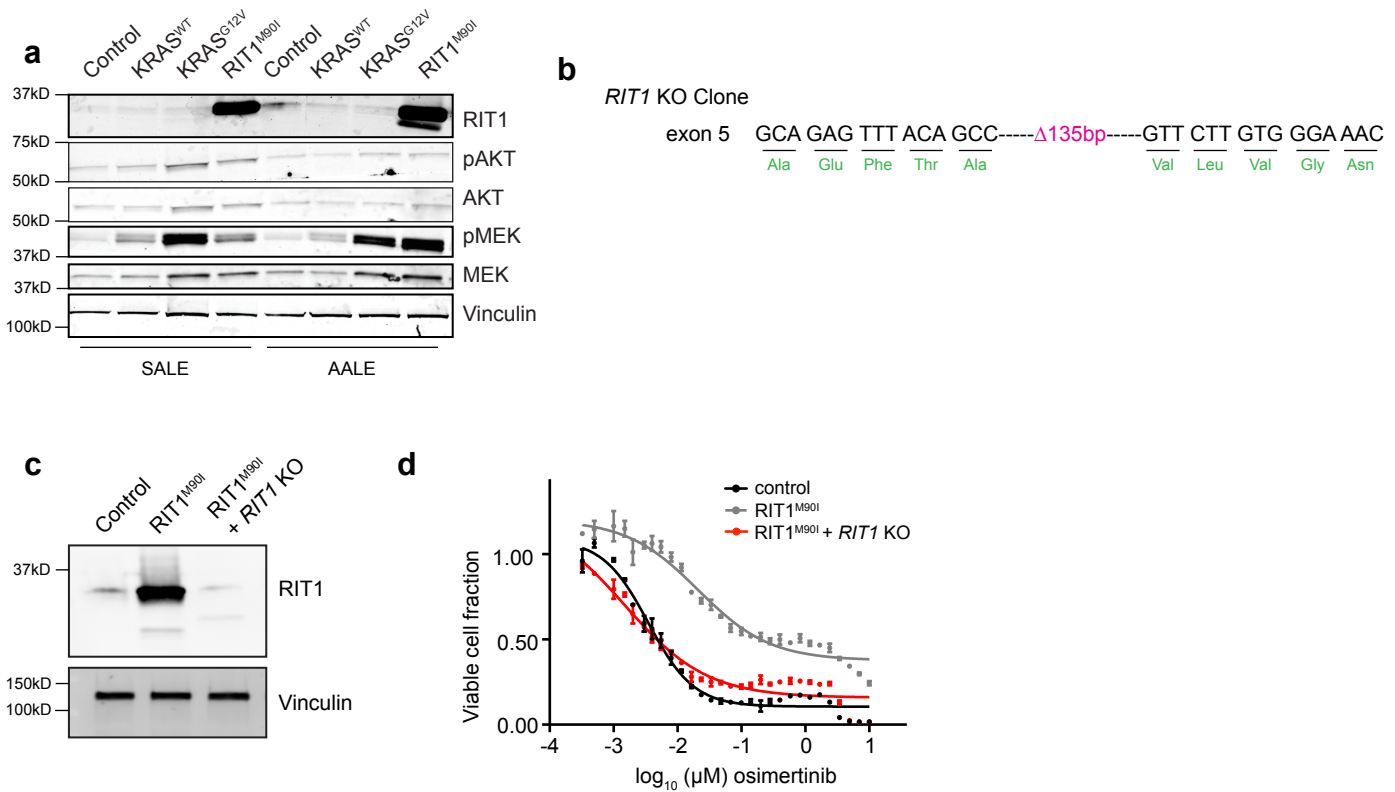

**Supplementary Fig. 1.** **a**, Western blot of lysates from SALE and AALE cells stably expressing wild-type or mutant *RIT1* or mutant *RAS* constructs, and empty vector (control). Vinculin was used as a sample processing control. pAKT, phosphorylated Ser473. p-MEK, phosphorylated Ser217/221. Blot representative of  $n=3$  independent experiments. **b**, Schematic of the 135bp deletion identified by Sanger sequencing and ICE analysis in *RIT1* knockout clones generated at the *RIT1* locus by transfection with three synthetic sgRNAs. **c**, Western blot of *RIT1* expression in clonal *RIT1* knockout cells compared to parental PC9-Cas9-*RIT1*<sup>M90I</sup> cells or control PC9-Cas9-luciferase cells. Blot representative of  $n=3$  independent experiments. **d**, 96 hour dose-response curve of clonal *RIT1* knockout in osimertinib. Viable cell fraction was determined by CellTiterGlo luminescence of treated vs. DMSO-treated cells. Data shown is the mean  $\pm$  s.d. of two technical replicates. Uncropped gels are available as source data.

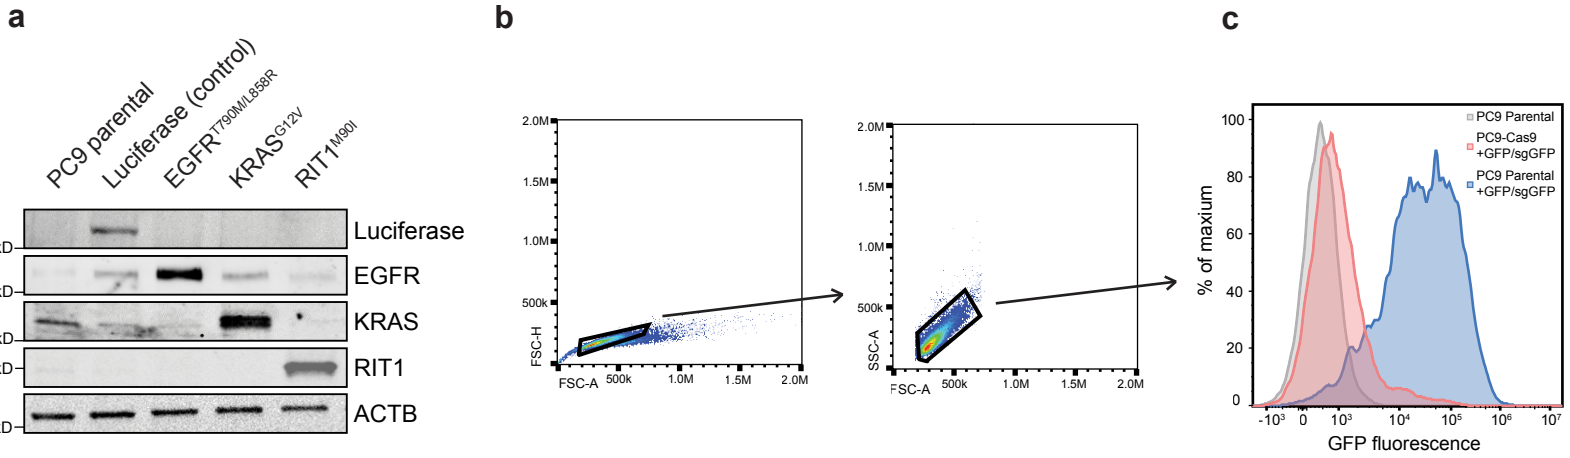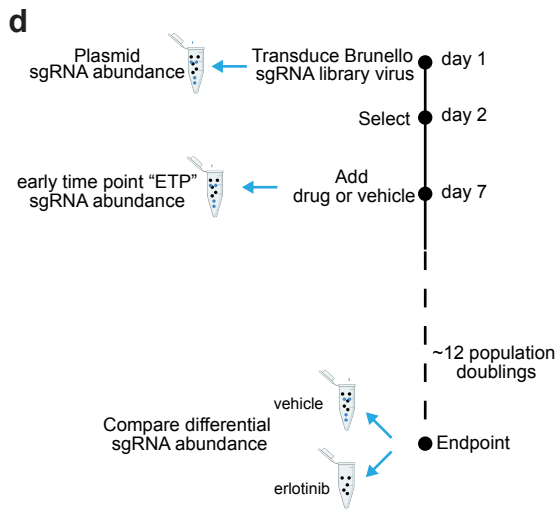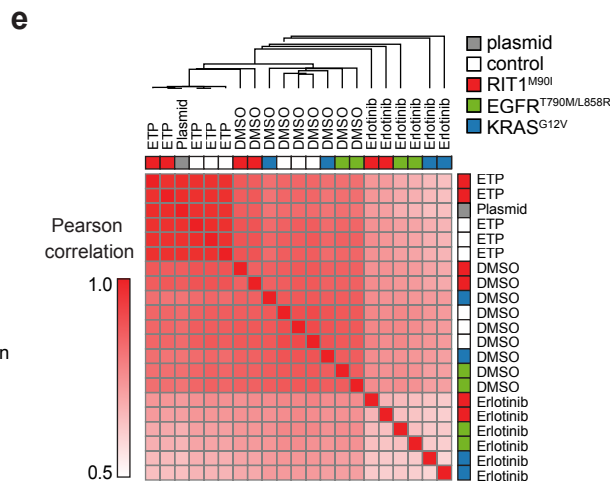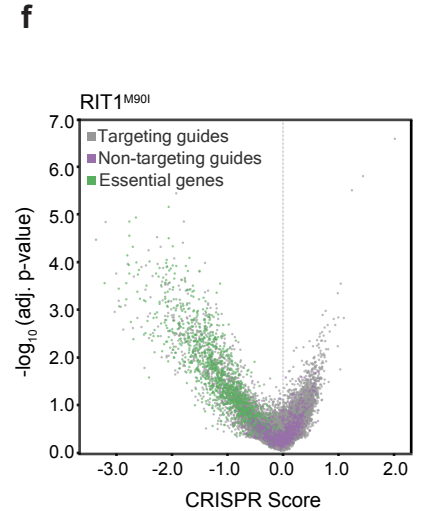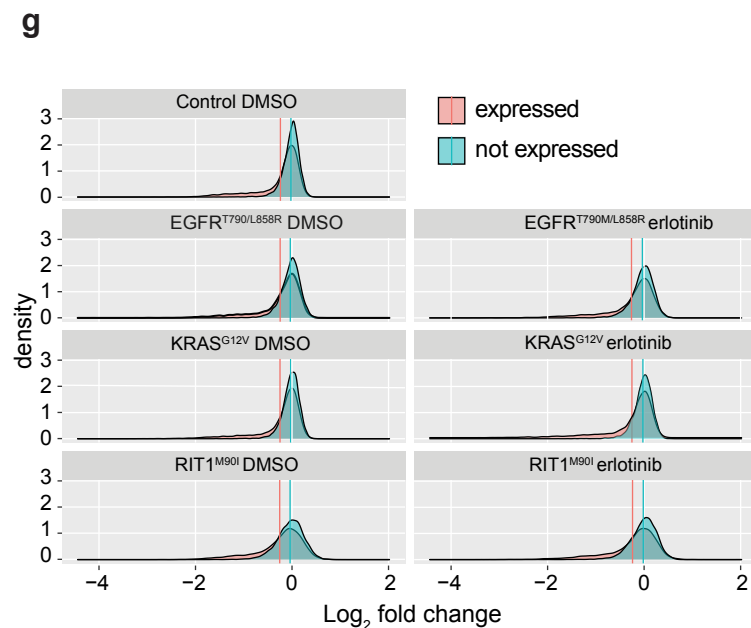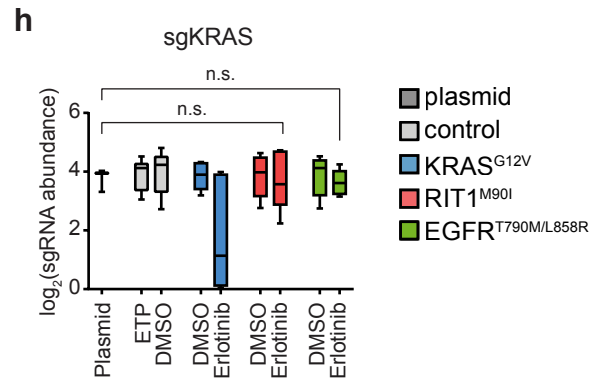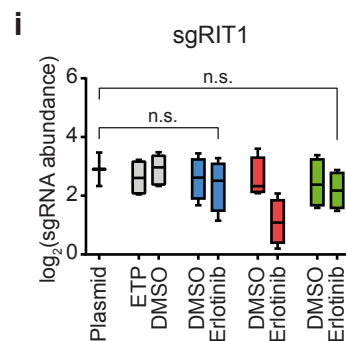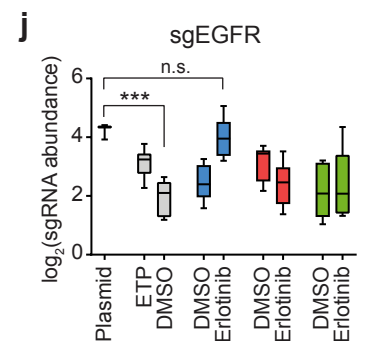

**Supplementary Fig. 2. a**, Western blot of lysates generated from parental PC9 cells or stable PC9 cell pools expressing Cas9 and indicated oncogenes. Actin served as a sample processing control. The primary antibodies used are indicated on the right. Blot representative of n=2 technical experiments. **b**, Gating strategy and **c**, distribution of fluorescence in stable Cas9-expressing PC9 cells transduced by EGFP-targeting sgRNAs (red), or non-Cas9 expressing PC9 cells transduced by EGFP-targeting sgRNAs (blue), and non-fluorescent PC9 cells (gray). **d**, Schematic illustrates the workflow of genome-wide CRISPR/Cas9 knockout library screening. On day 1 the human genome-wide Brunello CRISPR/Cas9 knockout library (Brunello) was transduced into isogenic PC9 cells at low MOI. The transduced cells were selected by puromycin on day 2. Cells were cultured in vehicle (DMSO) or erlotinib for ~12 population doublings. Genomic DNA was extracted from erlotinib and vehicle treated cells and the sgRNA sequence was amplified by PCR. Abundance of sgRNAs was determined by Illumina sequencing and analyzed by MAGeCK<sup>35</sup>. Schematic created with BioRender.com. **e**, Pairwise Pearson correlation matrix of sgRNA abundance across screen replicates. Each column/row corresponds to a different replicate. **f**, Volcano plot showing the distribution of targeting guides, essential guides, and control non-targeting guides (collapsed at gene level and/or average of four sgRNA per gene) after normalization. CRISPR Score was calculated as described in the Method. Data shown is from PC9-Cas9-RIT1<sup>M90I</sup> but similar results were obtained from each cell line. **g**, log<sub>2</sub> fold-change distribution of all sgRNAs targeting expressed genes (red) or non-expressed genes (blue) in each cell line. Vertical lines indicate the mean of each distribution. **h-j**, Expanded view of data shown in Fig. 2d. Box plot showing the log<sub>2</sub> sgRNA abundance (reads per million) from sgRNAs targeting **h**, *KRAS*, **i**, *RIT1* or **j**, *EGFR* in isogenic PC9-Cas9 cells by screening condition. Plasmid, starting plasmid library. Control, Firefly luciferase vector control cells. ETP, early time point. DMSO, vehicle control. Box plots show the median (center line), first and third quartiles (box edges), and the min and max range (whiskers) of replicates. \*\*\* p = 0.001, calculated by one-sided permutation testing using MAGeCK. For control PC9 cells ETP and DMSO n=3 biological replicates. For oncogene-expressing PC9 cells DMSO and erlotinib n=2 biological replicates. Uncropped gels are available as source data.

■ plasmid □ control ■ KRAS<sup>G12V</sup> ■ RIT1<sup>M90I</sup> ■ EGFR<sup>T790M/L858R</sup>

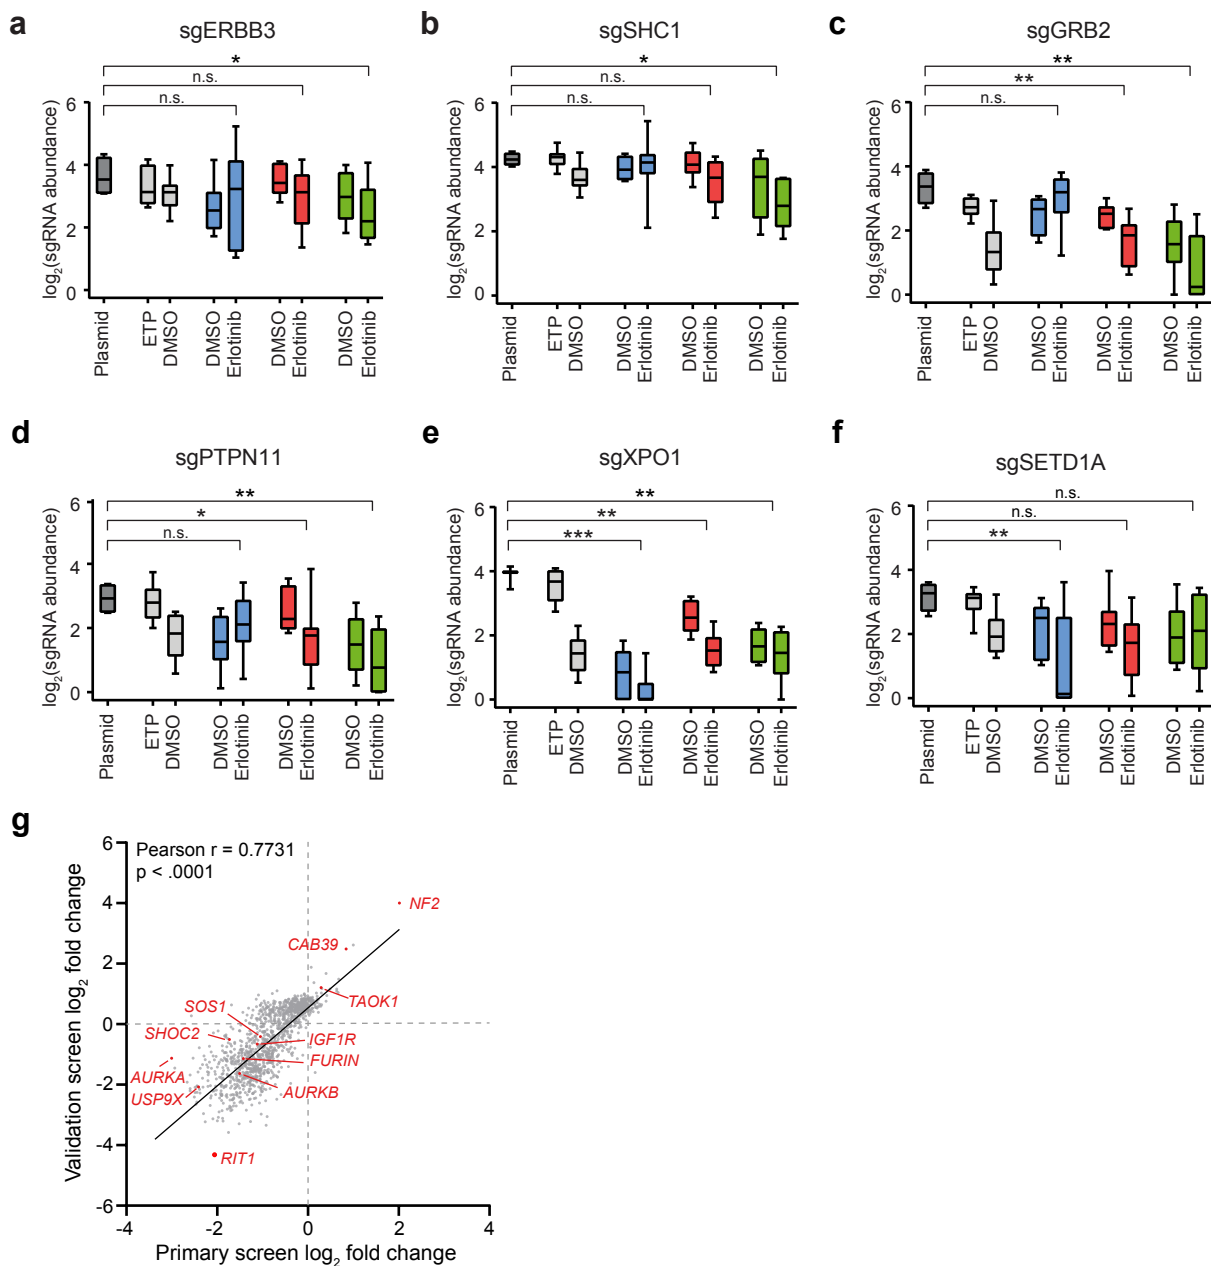

**Supplementary Fig. 3. a-f**, Box plot showing the  $\log_2$  sgRNA abundance (reads per million) from sgRNAs targeting key genes discussed in the text. Labeling is as in Supplementary Fig. 2h-j. \*  $p < 0.05$ , \*\*  $p < 0.01$ , \*\*\*  $p < 0.001$  (a, \*  $p = 0.037$ . b, \*  $p = 0.033$ . c, \*\*  $p = 0.003$  (plasmid v. RIT1<sup>M90I</sup>), \*\*  $p = 0.002$  (plasmid v. EGFR<sup>T790M/L858R</sup>). d, \*  $p = 0.035$ , \*\*  $p = 0.002$ . e, \*\*\*  $p = 1.15e^{-5}$ , \*\*  $p = 0.001$  (plasmid vs. RIT1<sup>M90I</sup>), \*\*  $p = 0.004$  (plasmid vs. EGFR<sup>T790M/L858R</sup>). f, \*\*  $p = 0.003$ ) calculated by one-sided permutation testing using MAGeCK. For control PC9 cells ETP and DMSO  $n=3$  biological replicates. For oncogene-expressing PC9 cells DMSO and erlotinib  $n=2$  biological replicates. **g**, Primary and secondary CRISPR screen correlation analysis in PC9-Cas9-RIT1<sup>M90I</sup> erlotinib-treated cells. The solid black diagonal line displays the linear regression. Relevant RIT1<sup>M90I</sup> dependencies and cooperating genes discussed in the text are labeled in red.

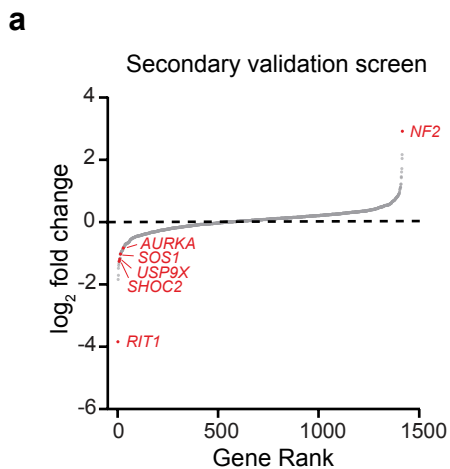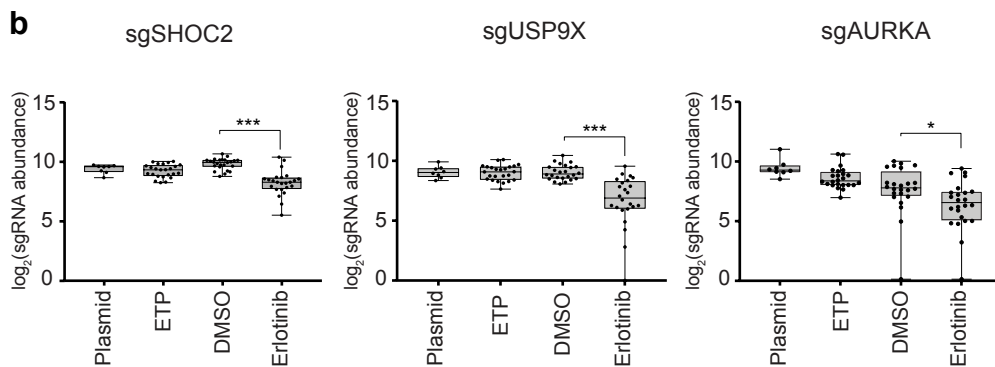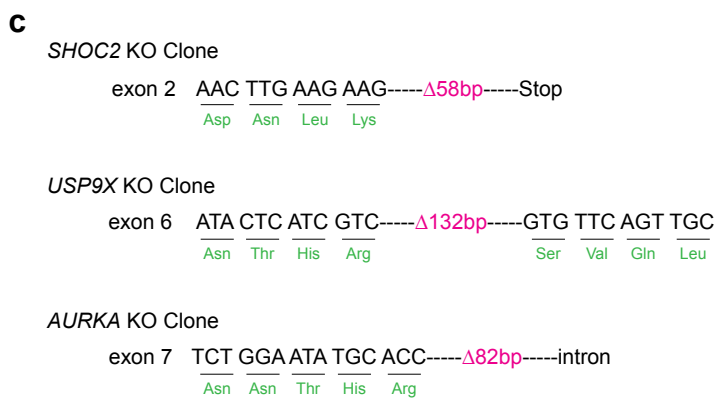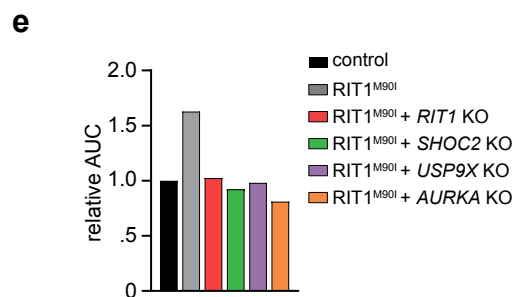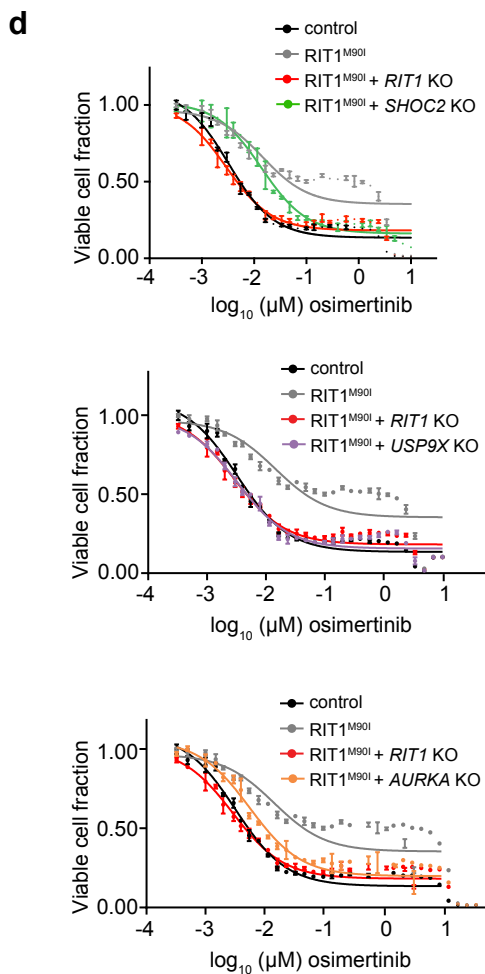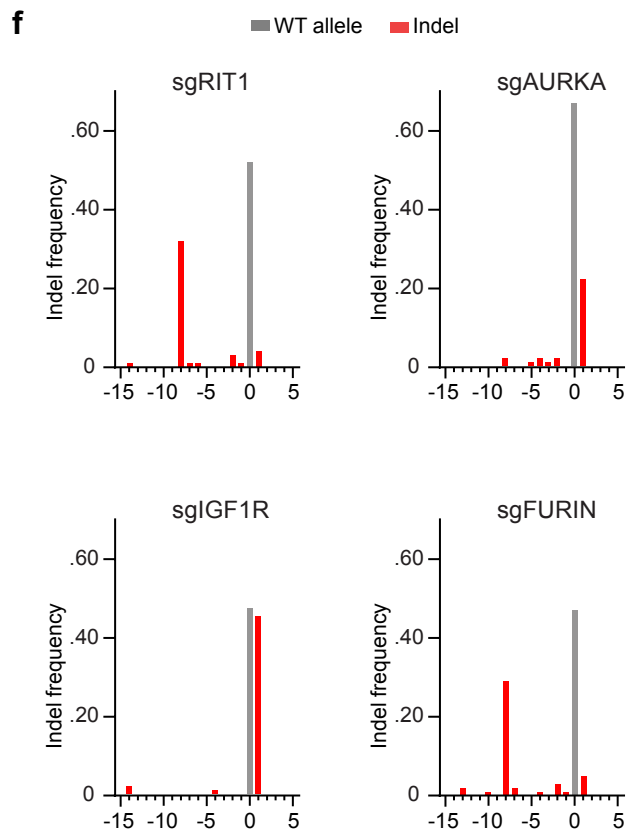

**Supplementary Fig. 4. a**, Rank plot of the mean difference in CRISPR score of PC9-Cas9-RIT1<sup>M901</sup> erlotinib-treated and vehicle (DMSO) treated cells of secondary validation screen. Selected essential genes are labeled in red. **b**, Validation of *SHOC2*, *USP9X*, and *AURKA*, dependencies in PC9-Cas9-RIT1<sup>M901</sup>. Data shown is 8 sgRNAs across three biological replicates of each condition. \*  $p < 0.05$ , \*\*\*  $p < 0.001$  (\*\*\*)  $p = 0.0002$  (sgSHOC2), \*\*\*  $p = 0.0008$  (sgUSP9X), \*  $p = 0.034$ , calculated by unpaired two-tailed t-test. **c**, Schematic of the deletions identified by Sanger-sequencing and ICE analysis in *SHOC2*, *USP9X*, and *AURKA* knockout clones generated by transfection with synthetic multi-guide sgRNA guides in PC9-Cas9-RIT1<sup>M901</sup> cells. **d**, 96-hour dose-response curve of osimertinib in clonal *SHOC2* knockout (KO), *USP9X* KO, or *AURKA* KO cells derived from PC9-Cas9-RIT1<sup>M901</sup> cells. The same data for control and PC9-Cas9-RIT1<sup>M901</sup> cells is plotted on each panel for reference. Data shown is the mean  $\pm$  s.d. of 2 technical replicates. **e**, Area under the curve (AUC) analysis of data from panel (d). **f**, Histogram representing the frequency of indel lengths induced by Cas9 in NCI-H2110 expressing stated sgRNA after 5 days of doxycycline treatment.

■ plasmid □ control ■ KRAS<sup>G12V</sup> ■ RIT1<sup>M90I</sup> ■ EGFR<sup>L858R/T790M</sup>

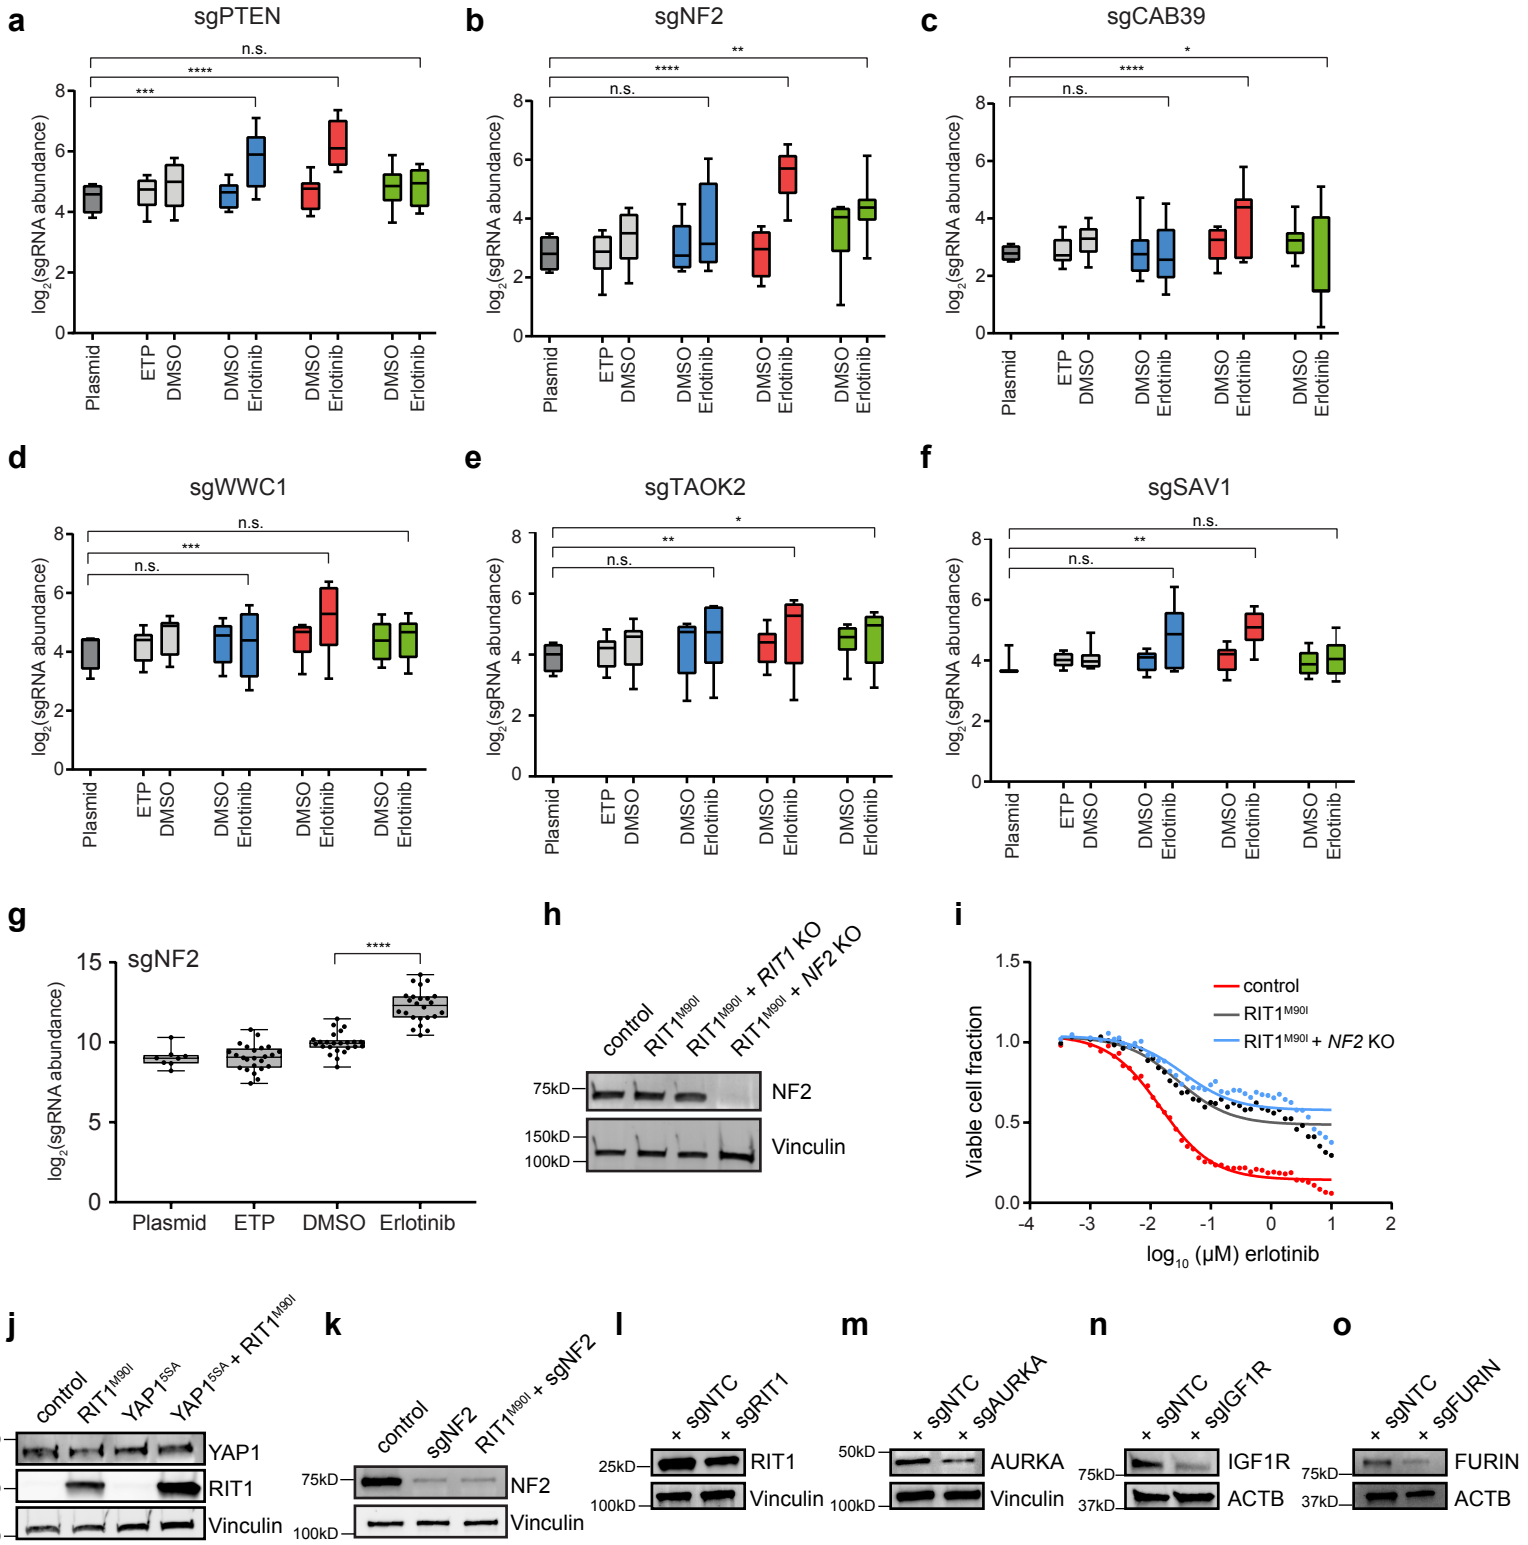

**Supplementary Fig. 5. a-f**, Box plot showing the  $\log_2$ sgRNA abundance (reads per million) from sgRNAs targeting key Hippo pathway genes across isogenic PC9-Cas9 cells line by condition. Labeling is as in Supplementary Fig. 2h-j. \*  $p < 0.05$ , \*\*  $p < 0.01$ , \*\*\*  $p < 0.001$ , \*\*\*\*  $p < 0.0001$  (**a**, \*\*\*  $p = 0.0009$ , \*\*\*\*  $p = 0.000002$ . **b**, \*\*\*\*  $p = 0.0000002$ , \*\*  $p = 0.0042$ . **c**, \*\*\*\*  $p = 0.000003$ , \*  $p = 0.04$ . **d**, \*\*\*  $p = 0.0004$ . **e**, \*\*  $p = 0.001$ , \*  $p = 0.0239$ . **f**, \*\*  $p = 0.002$ ), calculated by one-sided permutation testing using MAGeCK. **g**, Validation of *NF2* positive selection from the secondary validation screen in PC9-Cas9-RIT1<sup>M90I</sup> cells. Data shown is 8 sgRNAs across three biological replicates of each condition. Box plots show the median (center line), first and third quartiles (box edges), and the min and max range (whiskers) of replicates, \*\*\*\*  $p = 0.0000003$  by unpaired two-tailed t-test. **h**, Western blot of lysates from control, PC9-Cas9-RIT1<sup>M90I</sup>, PC9-Cas9-RIT1<sup>M90I</sup> + *RIT1* KO, and PC9-Cas9-RIT1<sup>M90I</sup> + *NF2* KO cells. Vinculin was used as a loading control. **i**, Dose-response curve of erlotinib in PC9-Cas9-RIT1<sup>M90I</sup> + *NF2* knockout cell pools. Cells were treated with erlotinib for 96-hours. Viable cell fraction was determined by CellTiterGlo luminescence of treated cells normalized to the average value of DMSO-treated cells. Data shown is the mean + s.d. of 2 technical replicates. **j**, Western blot of lysates from SALE cells used for the xenograft assay in Fig. 7g. Vinculin was used as a loading control. **k**, Western blot of lysates from SALE cells used for the xenograft assay in Fig. 7h. Vinculin was used as a loading control. **l-o**, Western blot of lysates from RIT1<sup>M90I</sup> + YAP1<sup>5SA</sup> cells transduced with control non-targeting (NTC) or the indicated gene-specific sgRNA and induced with doxycycline in vitro for 5 days. Vinculin or beta-Actin (ACTB) was used as a loading control. Uncropped gels are available as source data.



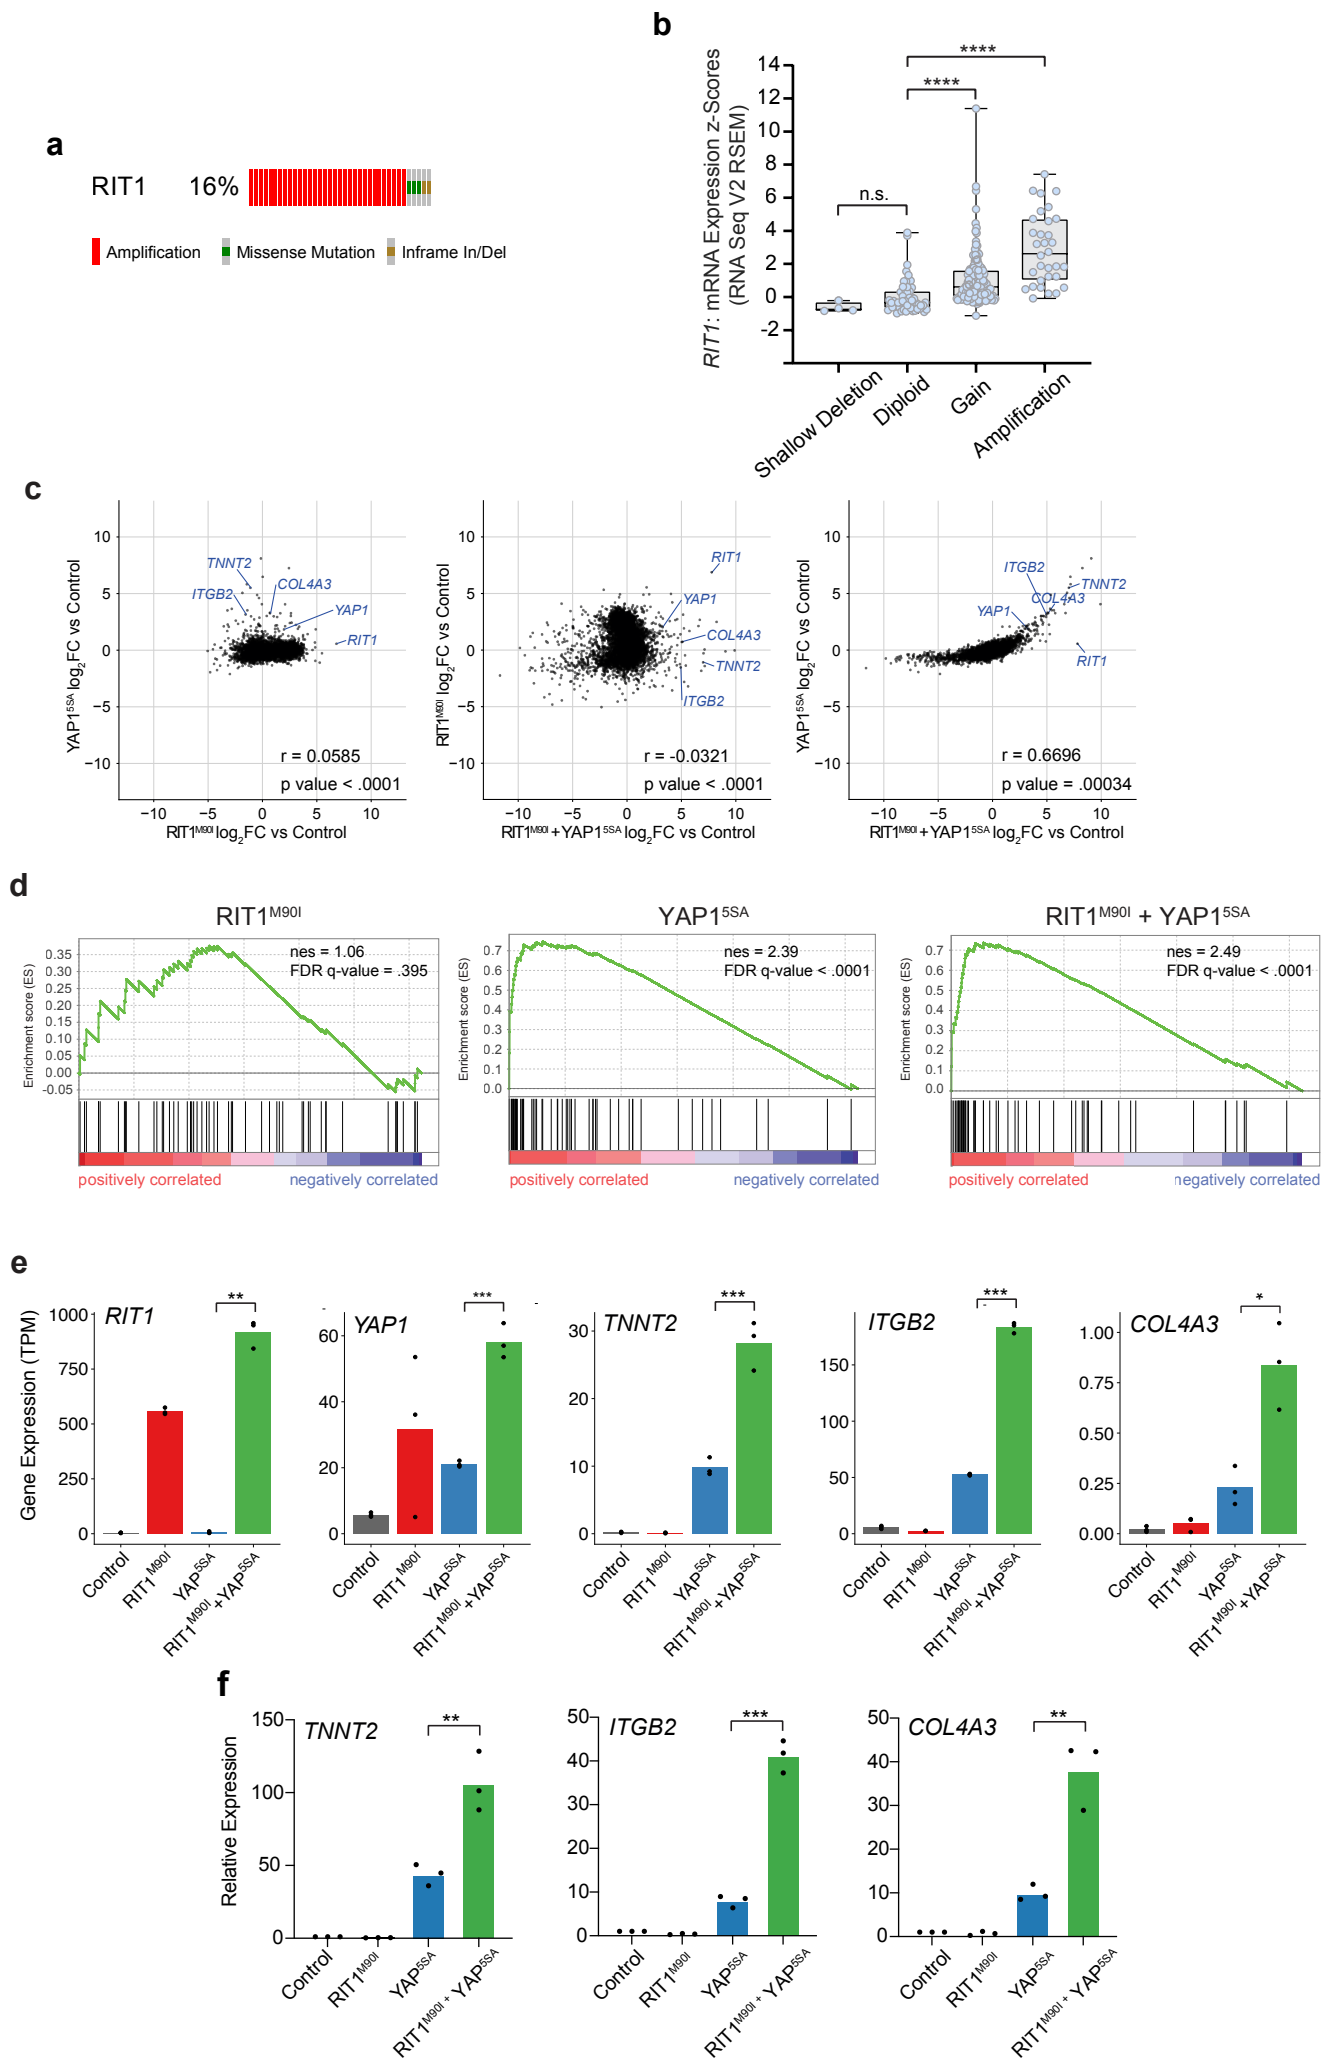

**Supplementary Fig. 6. a**, Frequency of *RIT1* amplification and mutation (n=37) from the TCGA lung adenocarcinoma paper<sup>6</sup>, visualized using cBioPortal (<http://cbio.mskcc.org>). Each column represents a sample. Samples lacking alterations (n=193) in *RIT1* are not shown. 16% indicates the percentage of samples in the cohort with mutation or amplification in *RIT1* (37/230). **b**, Box plot showing the relationship between *RIT1* mRNA abundance and copy number of *RIT1* from TCGA analysis shown in (j). Diploid, two alleles present; Gain, low-level gene amplification event; Amplification, high-level gene amplification event. \*\*\*\*  $p < 0.0001$  (diploid vs. gain: \*\*\*\*  $p = 7.3338e^{-6}$ , diploid vs. amplification: \*\*\*\*  $p = 2.9354e^{-13}$  by unpaired two-tailed t-test). **c**, Pairwise comparisons of transcriptomic changes due to  $RIT1^{M90I}$ ,  $YAP1^{5SA}$ , or  $RIT1^{M90I} + YAP1^{5SA}$  compared to control. Differential expression is plotted as  $\log_2(\text{fold-change})$ . Pearson correlations are shown. For  $RIT1^{M90I}$  compared to  $YAP1^{5SA}$   $p = 6.155 \times 10^{-11}$ , for  $RIT1^{M90I}$  compared to  $RIT1^{M90I} + YAP1^{5SA}$   $p < 2.2 \times 10^{-16}$ . **d**, Gene Set Enrichment Analysis of the Cordenosi YAP signature in differentially expressed genes in  $RIT1^{M90I}$ ,  $YAP1^{5SA}$ , or  $RIT1^{M90I} + YAP1^{5SA}$  compared to control. **e**, Transcript levels from RNA-seq of *RIT1*, *YAP1*, and *YAP1*-regulated genes *TNNT2*, *ITGB2*, *COL4A3*. Data shown is the average transcripts per million (TPM) three individual replicates (points). n.s.,  $p > 0.05$ , \*  $p < 0.05$ , \*\*  $p < 0.01$ , \*\*\*  $p < 0.001$ , by unpaired two-tailed t-test. For *RIT1*, \*\*  $p = 0.0044$ ; for *YAP1*, \*\*\*  $p = 0.00049$ ; for *TNNT2*, \*\*\*  $p = 0.00061$ ; for *ITGB2*, \*\*\*  $p = 4.16 \times 10^{-6}$  for *COL4A3*, \*  $p = 0.0139$ , by unpaired two-tailed t-test. **f**, Quantitative RT-PCR validation of *TNNT2*, *ITGB2*, and *COL4A3* relative expression in SALE cell lines analyzed in (e). Data shown is the average of three biological replicates (points) after normalization to *18S* expression. For *TNNT2*, \*\*  $p = 0.0078$ ; for *ITGB2*, \*\*\*  $p = 0.0001$ ; for *COL4A3*, \*\*  $p = 0.0038$  by unpaired two-tailed t-test.

Supplementary Table 1. Sequence of each multi-guide sgRNA within the multiplex library from Synthego.

| guide_label     | guide_sequence        | guide_number | gene  | seqid | cutsite   | transcript_id      |
|-----------------|-----------------------|--------------|-------|-------|-----------|--------------------|
| AURKA+56381415  | TAAGTGTTCAATTTATTGTCC | 1            | AURKA | chr20 | 56381415  | ENST00000312783.10 |
| AURKA+56381497  | ATTCTGGAATATGCACCACT  | 2            | AURKA | chr20 | 56381497  | ENST00000312783.10 |
| AURKA+56381551  | CCTAATATTCTTAGACTGTA  | 3            | AURKA | chr20 | 56381551  | ENST00000312783.10 |
| NF2-29661210    | TTGGATCCACAGAATAAAAA  | 1            | NF2   | chr22 | 29661210  | ENST00000338641.8  |
| NF2+29661249    | GGTCATAAATGTGAAGCCCC  | 2            | NF2   | chr22 | 29661249  | ENST00000338641.8  |
| NF2+29661303    | TGTTTCGGATTTCAATCCAC  | 3            | NF2   | chr22 | 29661303  | ENST00000338641.8  |
| RIT1-155904353  | TTGTTTCCACAAGAACCAC   | 1            | RIT1  | chr1  | 155904353 | ENST00000368323.7  |
| RIT1-155904411  | GTTTAAACTCACGAATTC    | 2            | RIT1  | chr1  | 155904411 | ENST00000368323.7  |
| RIT1+155904488  | AGGCAGAGTTTACAGCCATG  | 3            | RIT1  | chr1  | 155904488 | ENST00000368323.7  |
| SHOC2-110964869 | TTGATAACTTGAAGAAGCTG  | 1            | SHOC2 | chr10 | 110964869 | ENST00000369452.8  |
| SHOC2-110964927 | TCCTTCAGTGGTGTATAGGC  | 2            | SHOC2 | chr10 | 110964927 | ENST00000369452.8  |
| SHOC2-110964981 | TCGTATAACTACTGTGGAAA  | 3            | SHOC2 | chr10 | 110964981 | ENST00000369452.8  |
| USP9X-41136832  | TAACAATACTCATCGTCTGG  | 1            | USP9X | chrX  | 41136832  | ENST00000378308.6  |
| USP9X+41136904  | GAATTTGCAATGAGGATTTA  | 2            | USP9X | chrX  | 41136904  | ENST00000378308.6  |
| USP9X+41136964  | TTCAGGCAACTGAACACTTG  | 3            | USP9X | chrX  | 41136964  | ENST00000378308.6  |

Supplementary Table 2. Sequence of each sgRNA used to generate individual gene knockouts in H2110iCas9 and SALEiCas9 cells.

| <b>gene_target</b>          | <b>guide_sequence</b> |
|-----------------------------|-----------------------|
| NTC (non-targeting control) | AAAATAGCAGTAAACTCAAC  |
| RIT1                        | CAGGTGTATCGTCAGTACGT  |
| NF2                         | GCTTGGTACGCAGAGCACCG  |
| AURKA                       | CCATATAGAAAATAATCCTG  |
| IGF1R                       | GGAGAACGACCATATCCGTG  |
| FURIN                       | CAACGTGCCGTGGTACAGCG  |

Supplementary Table 3.

| Primer Name | Sequence                                                                                         |
|-------------|--------------------------------------------------------------------------------------------------|
| P5          | AATGATACGGCGACCACCGAGATCTACACTCTTTCCCTACACGACGCTC<br>TTCCGATCT[s]TTGTGGAAAGGACGAAACACCG          |
| P7          | CAAGCAGAAGACGGCATAACGAGAT[NNNNNNNN]GTGACTGGAGTTCAGAC<br>GTGTGCTCTCCGATCTTCTACTATTCTTTCCCTGCACTGT |

P5/P7 primers were purchased from Integrated DNA Technologies (IDT).

[s] = stagger region, [NNNNNNNN] = barcode.

Supplementary Table 4. Primer sequences used for Sanger sequencing of pooled and clonal individual gene knockouts in PC9-Cas9 cells.

| <b>Gene</b> | <b>Forward Oligo</b>   | <b>Reverse Oligo</b>      |
|-------------|------------------------|---------------------------|
| AURKA       | CAGATTCTAAAGTGGGGTTTGG | CCTGGGCAACATAACAAGACC     |
| NF2         | GCCTGCTTATTTAACCAGAGGG | CAACAACCACACCCTCAAAGCC    |
| RIT1        | CGTATTGATGATGAGCCTGC   | CACAAAGGGAGGGAAAGAGA      |
| SHOC2       | CAGCAGAGGTGGGATGTTTA   | CCAAGGCCTCTTACCAATTTTCAGC |
| USP9X       | GCGTCAGACTTCTGCATTT    | GCTTCTCCTTGATTGCAAC       |

Supplementary Table 5. Primer sequences used for Sanger sequencing of pooled gene knockouts in H2110iCas9 and SALEiCas9 cells.

| <b>Gene</b> | <b>Forward Oligo</b>   | <b>Reverse Oligo</b>    |
|-------------|------------------------|-------------------------|
| RIT1        | CGTATTGATGATGAGCCTGC   | CACAAAGGGAGGGAAAGAGA    |
| NF2         | TGAGCTGTTTGAGTGGCGAGG  | CGCCACTGCATTTTCAGCCTGGA |
| AURKA       | ACTCTCACACCTGACGGCAGCT | CCACCAGCCGTAGTCAACCTGC  |
| FURIN       | TCCTGGCCTCAAGCGATCCTCC | ATTGGGGCCTGTGATGGGTGGA  |
| IGF1R       | GTGTGACATGCTGGGCCTCTGG | AACAAGGGCAGCTGAAGACGGC  |
