# Supplementary material for: Integrative oncogene-dependency mapping identifies RIT1 vulnerabilities and synergies in lung cancer
Source: Springer Nature journal article supplement (doi:10.1038/s41467-021-24841-y), 2021-08-09
Supplement: MOESM4 [file 41467_2021_24841_MOESM4_ESM%20(1).xlsx]

## Sheet: CRISPR Score
Column1	Gene Id	Control/Luciferase_DMSO_CS_avg	EGFRL858R/T790M_DMSO_CS_avg	EGFRL858R/T790M_ERLO_CS_avg	KRASG12V_DMSO_CS_avg	KRASG12V_ERLO_CS_avg	RIT1M90I_DMSO_CS_avg	RIT1M90I_ERLO_CS_avg	RIT1M90I_DMSO_CS_RepA	RIT1M90I_DMSO_CS_RepB	RIT1M90I_ERLO_CS_RepA	RIT1M90I_ERLO_CS_RepB	Control/Luciferase_DMSO_CS_RepA	Control/Luciferase_DMSO_CS_RepB	Control/Luciferase_DMSO_CS_RepC	KRASG12V_DMSO_CS_RepA	KRASG12V_DMSO_CS_RepB	KRASG12V_ERLO_CS_RepA	KRASG12V_ERLO_CS_RepB	EGFRL858R/T790M_DMSO_CS_RepA	EGFRL858R/T790M_DMSO_CS_RepB	EGFRL858R/T790M_ERLO_CS_RepA	EGFRL858R/T790M_ERLO_CS_RepB	Normalization	neglog10_RIT1M90I_DMSO_avg_pvalue	neglog10_RIT1M90I_ERLO_avg_pvalue	neglog10_Control/Luciferase_DMSO_avg_pvalue	neglog10_KRASG12V_DMSO_avg_pvalue	neglog10_KRASG12V_ERLO_avg_pvalue	neglog10_EGFRL858R/T790M_DMSO_avg_pvalue	neglog10_EGFRL858R/T790M_ERLO_avg_pvalue
1	A1BG	-0.121698	0.106042	0.140782	0.0220054	-0.0405122	-0.0482715	0.198805	-0.131781	0.0352383	0.324115	0.0734947	-0.29149	-0.125878	0.0522729	0.0558475	-0.0118368	0.00135784	-0.0823822	0.125224	0.0868591	0.1482	0.133363	NA	0.435701	0.772795	0.266001	0.270819	0.493407	0.462332	0.497129
2	A1CF	0.0335935	-0.00712301	-0.012098	-0.17216	-0.0123252	-0.104357	-0.0500222	-0.0506015	-0.158113	-0.264433	0.164389	0.110155	-0.0228159	0.0134417	-0.10046	-0.24386	-0.0201395	-0.00451085	0.120125	-0.134371	0.14936	-0.173556	NA	0.306933	0.426782	0.405607	0.443461	0.181042	0.36684	0.471064
3	A2M	0.152108	-0.117613	-0.108432	0.0404931	-0.085381	0.0332509	-0.126521	-0.0431161	0.109618	0.0303403	-0.283383	0.111482	0.113195	0.231648	-0.0915899	0.172576	-0.166286	-0.00447627	-0.228716	-0.00651102	-0.132974	-0.0838903	NA	0.251653	0.175256	0.954677	0.302217	0.266554	0.183593	0.177038
4	A2ML1	0.0306535	0.124568	0.0827557	-0.0357222	0.037893	-0.0762387	-0.111059	-0.209706	0.0572286	-0.193076	-0.0290409	0.107301	-0.177477	0.162136	-0.154721	0.0832769	0.285966	-0.21018	0.221782	0.0273547	-0.177911	0.343423	NA	0.440542	0.277444	0.500313	0.238425	0.394732	0.912558	0.432712
5	A3GALT2	-0.183661	-0.146044	0.0783417	-0.0882287	-0.123579	-0.0358764	0.110856	-0.0650149	-0.0067379	0.0539079	0.167803	-0.258475	-0.138951	-0.153556	-0.163976	-0.012481	-0.107766	-0.139392	-0.221197	-0.0708918	-0.213157	0.369841	NA	0.221773	0.397132	0.321482	0.184436	0.275417	0.28059	0.295163
6	A4GALT	0.0318961	0.109004	0.0890056	0.211109	0.0117301	0.487537	-0.0127877	0.380892	0.594182	-0.0863039	0.0607285	0.0931934	-0.00877065	0.0112656	0.348032	0.0741862	0.446121	-0.422661	-0.124815	0.342824	0.0918851	0.0861261	NA	0.841457	0.415929	0.274905	0.804754	0.489434	0.510505	0.289375
7	A4GNT	0.0646263	0.155351	0.0206305	0.0979526	-0.20093	0.480205	0.0423405	0.251308	0.709102	-0.0826119	0.167293	-0.274356	0.23131	0.236925	0.129829	0.0660758	-0.0360109	-0.365849	0.200253	0.110448	0.118004	-0.0767427	NA	0.776055	0.346527	0.454693	0.359837	0.495529	0.679823	0.248082
8	AAAS	-0.072201	-0.152337	-0.458719	-0.201521	-0.0145161	-0.240737	0.129767	0.271179	-0.752653	-0.0275207	0.287055	-0.343648	0.113327	0.0137177	-0.22499	-0.178051	-0.00445852	-0.0245738	-0.0241319	-0.280542	-0.751503	-0.165935	NA	0.391139	0.314124	0.365523	0.308145	0.638905	0.32609	0.398204
9	AACS	-0.0303266	0.0334779	0.268471	0.0544536	-0.0554095	-0.0539425	0.0435008	-0.098184	-0.00970102	0.0468959	0.0401056	-0.0502133	-0.0960338	0.0552674	0.124311	-0.0154036	-0.204032	0.0932131	-0.135158	0.202114	0.272736	0.264207	NA	0.477162	0.385192	0.279014	0.636924	0.219776	0.634203	0.881537
10	AADAC	-0.0694671	-0.0979611	-0.148632	-0.116322	-0.0148778	-0.114135	-0.264074	-0.186935	-0.0413352	-0.293594	-0.234554	-0.0455496	-0.0477412	-0.11511	-0.169114	-0.06353	-0.0558714	0.0261159	-0.104894	-0.0910284	0.0489528	-0.346216	NA	0.167418	0.396352	0.218245	0.259847	0.179421	0.286682	0.40309
11	AADACL2	-0.0128214	0.0215911	0.300054	0.142781	-0.384621	-0.162441	-0.0674904	-0.0315107	-0.293371	0.427878	-0.562859	0.114375	-0.227175	0.0743356	0.117249	0.168314	0.12849	-0.897732	0.00134818	0.041834	0.228906	0.371201	NA	0.224146	0.435239	0.199283	0.462786	0.575814	0.397696	0.791016
12	AADACL3	0.14917	0.162518	-0.398712	-0.0904435	0.145653	0.0965674	0.531531	0.293574	-0.100439	0.641258	0.421804	0.0174741	0.231992	0.198044	-0.169811	-0.0110763	0.408366	-0.11706	0.297231	0.0278052	-0.841993	0.0445695	NA	0.840367	1.16165	0.677781	0.329202	0.468809	0.846673	0.49966
13	AADACL4	0.199111	0.0236513	-0.112004	-0.166464	0.180498	-0.599136	0.0923295	-0.469986	-0.728285	0.258236	-0.0735773	0.313371	0.132703	0.151259	-0.16381	-0.169119	0.162436	0.19856	-0.139781	0.187084	-0.123653	-0.100354	NA	0.626013	0.321878	0.634512	0.403623	0.54578	0.247587	0.29838
14	AADAT	0.0068721	0.0208205	0.038055	-0.0724038	0.133323	0.10039	0.517723	-0.0611025	0.261883	0.58499	0.450456	0.254273	-0.23072	-0.00293676	-0.0979965	-0.0468112	0.0315698	0.235077	0.010697	0.0309441	-0.090506	0.166616	NA	0.561149	1.14824	0.379864	0.189039	0.633839	0.404113	0.191209
15	AAED1	-0.208831	-0.17673	0.147397	-0.0524775	0.010978	-0.134963	-0.294405	-0.550481	0.280556	-0.431118	-0.157691	-0.348495	-0.290337	0.0123379	-0.0918963	-0.0130588	-0.0483124	0.0702683	-0.0852241	-0.268237	0.274647	0.0201461	NA	0.506214	0.301225	0.609065	0.1892	0.437622	0.235073	0.34074
16	AAGAB	0.0887992	0.149367	-0.152124	0.240419	0.0639992	0.0406566	0.387253	0.0743098	0.00700345	0.588796	0.185709	-0.0127117	0.117376	0.161733	0.432998	0.0478396	0.268803	-0.140804	0.0460818	0.252652	-0.353776	0.0495289	NA	0.346681	0.64893	0.403403	0.584618	0.329571	1.00352	0.282508
17	AAK1	-0.119515	0.204353	-0.352796	0.0405264	0.255618	0.229927	0.0125326	-0.0111163	0.470971	0.345159	-0.320093	-0.288277	-0.0310087	-0.0392602	-0.0700176	0.15107	0.256868	0.254368	0.146501	0.262205	-0.0960639	-0.609529	NA	0.582611	0.286056	0.316053	0.411471	0.930643	0.723446	0.534287
18	AAMDC	-0.134222	-0.0785032	0.111152	-0.0899519	-0.0734291	-0.288963	0.00751211	-0.197932	-0.379993	0.230328	-0.215304	0.0911599	-0.400195	-0.0936313	0.0691195	-0.249023	0.0313918	-0.17825	0.0177264	-0.174733	0.248409	-0.0261045	NA	0.516926	0.264673	0.339135	0.296743	0.158209	0.381408	0.347754
19	AAMP	-1.17472	-1.5123	-0.878939	-1.59592	-1.11975	-1.40493	0.0791621	-1.68251	-1.12736	-0.19773	0.356054	-1.60008	-1.0549	-0.869175	-1.54861	-1.64323	-1.42484	-0.814667	-1.66139	-1.3632	-0.377164	-1.38071	essential_DepMap	2.81122	0.277206	2.60206	3.15919	1.78599	3.12797	0.98307
20	AANAT	0.0298502	0.0959704	0.230624	-0.0937427	0.192772	0.324502	-0.0335324	0.0411713	0.607832	-0.0327241	-0.0343407	0.234498	-0.0431515	-0.101796	-0.0487986	-0.138687	0.273522	0.112021	0.295832	-0.103892	0.150916	0.310333	NA	0.785616	0.305926	0.336299	0.395693	0.63529	0.416896	0.669141
21	AAR2	-0.116854	-0.00971526	-0.0463536	-0.0415372	-0.160638	-0.00622624	-0.144261	0.0853177	-0.0977702	-0.296225	0.00770284	-0.16424	-0.144398	-0.0419229	-0.0140681	-0.0690064	-0.149449	-0.171826	0.149425	-0.168855	0.010673	-0.10338	NA	0.20138	0.335114	0.180456	0.30136	0.163879	0.804945	0.242817
22	AARD	-0.0597756	-0.00773075	-0.381182	0.274142	0.173697	0.1392	-0.871875	0.189881	0.0885179	-0.521348	-1.2224	-0.279216	0.0423259	0.0575636	0.182977	0.365307	0.327169	0.0202256	0.125322	-0.140783	-0.0496885	-0.712675	NA	0.78408	0.914289	0.224026	1.01914	0.628417	0.632855	0.328699
23	AARS	-1.35119	-1.47937	-1.4533	-1.59156	-1.10649	-1.09142	-1.15145	-1.18401	-0.998834	-1.06024	-1.24267	-1.39413	-1.24501	-1.41443	-1.68645	-1.49667	-1.0124	-1.20058	-1.79303	-1.16571	-1.9871	-0.91951	essential_DepMap	2.51271	2.18315	4.26922	4.61024	3.53313	4.62388	2.61275
24	AARS2	-0.525902	-0.565163	-0.819857	-0.653257	-1.00344	-1.16061	-0.864914	-1.487	-0.834217	-0.900618	-0.829209	-0.700963	-0.459819	-0.416924	-0.794604	-0.51191	-0.80272	-1.20416	-0.518663	-0.611663	-0.592504	-1.04721	NA	1.27939	1.11348	1.13727	1.3559	1.69665	0.860924	1.21148
25	AARSD1	-0.288192	-0.0722894	-0.320158	-0.328347	-0.0932691	-0.522193	-0.0193517	-0.645769	-0.398618	-0.159137	0.120433	-0.36449	-0.228348	-0.271738	-0.561389	-0.0953048	0.136608	-0.323146	-0.255134	0.110555	-0.550303	-0.0900129	NA	0.815561	0.375383	0.696804	0.399154	0.264896	0.268194	0.512685
26	AASDH	-0.0845115	-0.0045284	0.171845	0.0365482	-0.0827514	0.198509	-0.032662	0.463933	-0.0669152	0.455599	-0.520923	-0.0406506	-0.152284	-0.0606004	-0.0523094	0.125406	0.251097	-0.4166	0.116614	-0.125671	0.115247	0.228444	NA	0.613136	0.410995	0.251812	0.853511	0.310549	0.380416	0.641486
27	AASDHPPT	-0.648346	-0.567657	-0.589355	-0.428893	-0.363303	-0.576413	-0.390267	-0.760469	-0.392357	-0.288715	-0.491818	-0.65934	-1.11652	-0.169173	-0.540757	-0.31703	-0.348485	-0.378121	-0.71811	-0.417205	-0.365003	-0.813708	essential_DepMap	0.673398	0.784746	0.910095	1.07433	0.719558	1.00574	0.842448
28	AASS	0.248044	0.384491	0.237084	0.161943	0.221551	0.36776	0.518502	0.379481	0.356039	0.43482	0.602184	-0.0182941	0.39117	0.371255	0.2511	0.0727857	0.43217	0.0109319	0.0840617	0.68492	0.0462219	0.427945	NA	0.945414	1.15071	0.815309	0.506206	0.632011	0.875672	0.608382
29	AATF	-0.622388	-0.940901	-0.44898	-0.631446	-0.983734	-1.07938	-0.842314	-1.38667	-0.772095	-0.606278	-1.07835	-0.424181	-0.8302	-0.612782	-0.686617	-0.576276	-0.790425	-1.17704	-1.20081	-0.680992	-0.41407	-0.483889	NA	1.34507	1.08392	1.94692	1.75538	1.82229	1.96397	0.984678
30	AATK	-0.0793465	-0.0296833	-0.00252288	-0.0037211	-0.193638	-0.296147	0.0985621	-0.59277	0.000476429	0.366942	-0.169817	-0.0566887	-0.104615	-0.0767359	-0.0781577	0.0707155	-0.238723	-0.148553	0.215312	-0.274679	-0.0130181	0.0079723	NA	0.333806	0.512113	0.197911	0.407501	0.306876	0.251998	0.226382
31	ABAT	0.331763	-0.0567577	-0.140413	0.24692	-0.122671	-0.014493	0.0264408	-0.0953227	0.0663366	-0.129571	0.182453	0.270967	0.309057	0.415266	0.0268186	0.467022	-0.230266	-0.0150768	-0.125261	0.0117457	-0.492034	0.211208	NA	0.238629	0.528437	1.47756	0.448924	0.95143	0.381879	0.411717
32	ABCA1	-0.0466518	-0.286463	0.0565551	0.145187	-0.263122	0.0405666	-0.156954	-0.0822916	0.163425	-0.228502	-0.0854062	-0.0903525	-0.0879304	0.0383276	0.174699	0.115676	-0.145053	-0.381191	-0.528917	-0.0440091	-0.0139872	0.127097	NA	0.447368	0.262716	0.207608	0.672483	0.66621	0.536875	0.386745
33	ABCA10	-0.256039	-0.227064	-0.128315	-0.201747	-0.260257	-0.168764	-0.201333	-0.0314935	-0.306035	-0.0248957	-0.377771	-0.213418	-0.305796	-0.248903	-0.0835606	-0.319934	-0.319556	-0.200957	-0.346467	-0.10766	-0.394682	0.138052	NA	0.503243	0.431247	0.447332	0.219488	0.505553	0.504483	0.395191
34	ABCA12	-0.128496	-0.312523	0.0754654	-0.109918	-0.272911	-0.553359	-0.405545	-0.14852	-0.958197	-0.283251	-0.527838	-0.237206	0.0043131	-0.152596	-0.201063	-0.0187732	-0.406955	-0.138867	-0.197723	-0.427322	-0.168356	0.319287	NA	0.444017	0.587581	0.348722	0.377356	0.51284	0.433563	0.492637
35	ABCA13	-0.133972	-0.0892794	-0.0632307	-0.000322407	-0.0778788	0.014489	-0.0774478	-0.211541	0.240519	-0.224969	0.0700731	-0.11299	-0.0491546	-0.239772	-0.0415005	0.0408557	0.0488988	-0.204656	-0.0294812	-0.149078	0.146717	-0.273179	NA	0.309911	0.344698	0.251037	0.200953	0.203471	0.27735	0.238918
36	ABCA2	-0.195796	0.103635	-0.188736	-0.104665	-0.0816072	-0.492276	-0.418644	-0.153567	-0.830985	-0.240658	-0.596629	-0.399779	-0.0750806	-0.112528	-0.0482783	-0.161051	-0.0304123	-0.132802	0.117866	0.0894045	-0.00277791	-0.374694	NA	0.619219	0.446056	0.560667	0.364461	0.413643	0.287325	0.268327
37	ABCA3	0.220898	0.115867	0.000174992	0.140873	-0.0566487	0.0685277	0.301326	0.127251	0.00980435	0.104027	0.498624	-0.00265821	0.374923	0.29043	0.208102	0.0736443	-0.0719076	-0.0413898	0.076053	0.15568	-0.0957005	0.0960505	NA	0.739666	0.392896	1.34294	0.826253	0.122479	0.52821	0.544135
38	ABCA4	-0.436079	-0.182997	-0.89143	-0.548658	-0.111874	-1.19851	-0.82955	-0.943281	-1.45373	-0.734073	-0.925027	-0.597088	-0.290854	-0.420295	-0.352197	-0.74512	-0.0574822	-0.166265	-0.272431	-0.0935638	-1.47569	-0.307169	NA	1.22259	0.97046	0.632644	0.858673	0.225454	0.216625	0.692762
39	ABCA5	-0.140489	-0.142757	-0.25068	-0.213589	-0.209757	-0.136322	-0.264202	-0.499019	0.226376	-0.343527	-0.184877	-0.32902	-0.185932	0.0934843	-0.0863414	-0.340837	0.185867	-0.605382	-0.274704	-0.0108105	-0.372229	-0.129132	NA	0.250271	0.190558	0.337242	0.481118	0.283683	0.289891	0.523038
40	ABCA6	0.00403685	0.0191054	0.28944	0.107673	-0.411704	0.0232664	0.0540078	-0.133498	0.180031	0.283864	-0.175848	-0.140352	0.111167	0.0412953	0.238567	-0.0232223	-0.593869	-0.229538	-0.0621121	0.100323	0.193033	0.385847	NA	0.238166	0.495915	0.308035	0.849512	0.819254	0.610604	1.28234
41	ABCA7	-0.0711303	0.0490973	-0.329271	0.134507	-0.0496006	-0.155948	-0.173419	-0.344507	0.0326105	-0.364002	0.0171632	-0.0112336	0.104508	-0.306665	0.182297	0.0867171	-0.042531	-0.0566702	0.0372409	0.0609537	0.0759225	-0.734465	NA	0.464638	0.193054	0.341989	0.786589	0.266967	0.27239	0.4544
42	ABCA8	-0.0885903	0.176131	-0.0875233	-0.0448542	-0.0450268	0.207956	0.195243	0.349863	0.0660482	0.438618	-0.0481313	-0.0818272	-0.0799901	-0.103954	-0.172236	0.0825279	0.0226114	-0.112665	0.184963	0.167299	0.0932322	-0.268279	NA	0.414082	0.362115	0.338187	0.561493	0.387158	0.776562	0.42814
43	ABCA9	-0.0319863	-0.227171	0.0764407	-0.089772	-0.00581694	-0.323312	-0.0329662	-0.459872	-0.186751	0.131538	-0.19747	0.206282	-0.253057	-0.0491841	-0.118094	-0.0614501	0.280365	-0.291999	0.0048412	-0.459184	0.275086	-0.122205	NA	0.3627	0.518879	0.320572	0.280951	0.463574	0.353165	0.402184
44	ABCB1	-0.123256	0.0277527	0.0523277	-0.153521	0.0460285	-0.293213	0.157194	0.0433041	-0.629731	0.657943	-0.343555	-0.201417	-0.0620631	-0.106289	-0.0613488	-0.245693	0.183722	-0.0916655	0.0839148	-0.0284094	0.0642052	0.0404501	NA	0.411919	0.476306	0.209012	0.187407	0.558101	0.279113	0.397239
45	ABCB10	0.0715008	0.127233	0.0790024	-0.0178464	0.101074	0.158183	-0.0200774	0.17392	0.142445	-0.0299239	-0.0102309	0.0910932	0.0489058	0.0745034	-0.00233674	-0.033356	0.129297	0.0728511	0.11227	0.142195	0.0843398	0.0736651	NA	0.407041	0.264896	0.432974	0.310989	0.312859	0.643506	0.625983
46	ABCB11	-0.00193677	0.111064	-0.0449506	0.0271083	0.132946	0.345001	-0.0537607	0.411645	0.278357	-0.105839	-0.00168275	0.165059	-0.162442	-0.00842758	-0.131384	0.1856	0.112158	0.153733	0.0973791	0.124748	-0.0328973	-0.0570039	NA	1.10338	0.544704	0.243364	0.718424	0.685368	0.631072	0.262791
47	ABCB4	0.0974675	0.0399665	-0.0268534	-0.0303655	-0.0263503	0.372598	-0.13929	0.597163	0.148033	-0.0186518	-0.259928	0.0449829	0.112744	0.134675	0.00227774	-0.0630088	-0.278833	0.226133	0.147152	-0.0672185	-0.0116881	-0.0420187	NA	0.644573	0.387412	0.59346	0.274354	0.346382	0.394087	0.309972
48	ABCB5	0.0113048	-0.0669708	-0.0982675	-0.0282204	-0.251649	0.0628564	-0.0423261	0.0341309	0.091582	-0.034444	-0.0502082	-0.0723364	0.0775781	0.0286727	-0.130061	0.0736199	-0.485821	-0.0174766	0.0123546	-0.146296	-0.0993865	-0.0971486	NA	0.457448	0.21615	0.170696	0.244213	0.536772	0.219481	0.253603
49	ABCB6	0.0664751	-0.108365	-0.0649148	-0.149953	0.0942058	-0.119126	-0.268598	-0.158434	-0.0798169	-0.038599	-0.498597	0.0638844	0.12104	0.0145005	-0.140043	-0.159864	0.0857965	0.102615	-0.281832	0.0651009	-0.0394536	-0.0903761	NA	0.740753	0.349241	0.298432	0.319012	0.398967	0.359906	0.283116
50	ABCB7	-1.02575	-1.16193	-0.658975	-1.04036	-1.06678	-1.29683	-0.885286	-1.15879	-1.43487	-1.38928	-0.381293	-1.15818	-0.815357	-1.1037	-0.948718	-1.13201	-1.45332	-0.68024	-1.32188	-1.00197	-0.465216	-0.852733	essential_DepMap	2.07211	1.16606	1.67162	2.24423	1.80319	2.24057	1.56382
51	ABCB8	-0.109174	0.0143827	0.0683731	-0.177359	-0.0393772	-0.210381	-0.435867	0.0618112	-0.482572	-0.872368	0.000633277	-0.0532256	-0.229355	-0.0449425	0.000148989	-0.354866	-0.143741	0.0649862	-0.143782	0.172548	0.00952948	0.127217	NA	0.364039	0.636678	0.275724	0.281523	0.200928	0.283196	0.388936
52	ABCB9	0.103605	-0.0235505	-0.00218191	0.192495	-0.134857	-0.0179771	-0.259345	-0.27729	0.241336	-0.259149	-0.25954	-0.0353695	0.129522	0.216662	0.182291	0.202698	-0.448241	0.178527	-0.00276525	-0.0443358	-0.103786	0.0994219	NA	0.381408	0.259712	0.563837	0.653657	0.564626	0.251277	0.415051
53	ABCC1	-0.0197978	0.0288109	-0.272295	-0.230065	-0.225396	-0.112317	0.030714	-0.211862	-0.0127723	-0.0882324	0.14966	0.0219877	-0.206361	0.12498	-0.120895	-0.339236	-0.120239	-0.330553	0.0254692	0.0321525	-0.350184	-0.194407	NA	0.202694	0.370395	0.254925	0.465968	0.321623	0.287182	0.571355
54	ABCC10	-0.0173216	0.0105695	-0.0261839	-0.161561	-0.0631714	-0.414873	-0.035213	-0.0635759	-0.766171	-0.035746	-0.03468	0.084506	-0.0326951	-0.103776	-0.216772	-0.10635	-0.330535	0.204192	0.00492444	0.0162146	0.0910026	-0.14337	NA	0.358992	0.467233	0.294992	0.427686	0.53457	0.397132	0.465187
55	ABCC11	-0.173234	-0.02577	0.325474	-0.0449509	-0.0386199	0.0173641	0.232924	0.0188149	0.0159132	0.354264	0.111585	-0.0150885	-0.125294	-0.379318	-0.0728644	-0.0170373	0.156127	-0.233367	-0.0623847	0.0108448	0.397089	0.25386	NA	0.359578	0.683652	0.378824	0.13476	0.267365	0.284352	1.07834
56	ABCC12	0.130374	0.12993	0.195305	0.0554706	0.0727598	0.188372	0.265816	0.296337	0.0804072	0.138099	0.393533	0.208149	0.0401458	0.142826	-0.0110609	0.122002	0.0747889	0.0707307	0.130092	0.129768	0.236498	0.154112	NA	0.440656	0.774176	0.627088	0.343552	0.230663	0.674628	0.641551
57	ABCC2	-0.0710646	0.132382	-0.0475004	0.0317092	-0.232496	0.206457	0.278708	0.248132	0.164783	0.170388	0.387028	-0.111535	-0.0180694	-0.0835896	-0.202439	0.265858	-0.142938	-0.322055	-0.0389699	0.303733	-0.409209	0.314208	NA	0.470974	0.897637	0.178486	0.4417	0.36213	0.979603	0.569675
58	ABCC3	-0.0286023	-0.268413	-0.41212	-0.169339	-0.243022	-0.0307883	-0.0897989	-0.0920686	0.0304921	-0.0936755	-0.0859223	-0.566472	0.24883	0.231836	-0.257601	-0.0810776	-0.0837999	-0.402245	-0.164654	-0.372173	-0.439416	-0.384824	NA	0.137302	0.366128	0.517126	0.299288	0.404928	0.443842	0.70321
59	ABCC4	0.0578406	-0.117978	0.0353469	0.156774	-0.324156	0.0417071	0.146435	-0.0635369	0.146951	-0.280675	0.573546	0.105768	-0.0149875	0.0827417	0.221028	0.0925198	-0.427393	-0.220919	-0.0890599	-0.146897	0.126311	-0.0556175	NA	0.324997	0.45583	0.38934	0.466711	0.615996	0.200591	0.199444
60	ABCC5	-0.06508	0.088893	-0.305483	-0.189374	-0.352959	-0.292437	0.291449	-0.212584	-0.372291	0.422757	0.160141	0.067038	-0.397598	0.13532	-0.100822	-0.277927	-0.665901	-0.0400162	0.0393951	0.138391	-0.706649	0.0956819	NA	0.457941	0.511851	0.50307	0.48514	1.26259	0.823981	0.505501
61	ABCC6	-0.0533097	-0.180684	0.196967	-0.0583612	-0.414051	0.00214123	-0.234565	-0.01199	0.0162725	-0.486101	0.0169713	-0.179148	-0.0149524	0.0341716	-0.117683	0.000960215	-0.581326	-0.246776	0.0398987	-0.401267	0.108318	0.285616	NA	0.542781	0.274513	0.405607	0.170738	0.700533	0.25662	0.495781
62	ABCC8	-0.177737	-0.123674	-0.201579	-0.0894931	0.318445	0.132846	-0.253221	-0.633454	0.899145	0.109537	-0.61598	-0.153606	-0.0517499	-0.327855	-0.197082	0.0180955	0.585258	0.0516309	0.120398	-0.367747	-0.424555	0.0213981	NA	0.886884	0.469896	0.300162	0.194979	0.407021	0.204002	0.573001
63	ABCC9	-0.00637658	0.0637696	0.00535948	-0.0366736	0.0117404	0.0185286	-0.0362596	-0.398503	0.43556	0.00560454	-0.0781238	-0.0837733	-0.139879	0.204523	-0.0315963	-0.0417508	0.110006	-0.0865251	0.186656	-0.0591169	0.268428	-0.257709	NA	0.424425	0.148246	0.333482	0.22963	0.309259	0.390961	0.438773
64	ABCD1	-0.0527045	-0.210689	0.0447258	-0.14374	-0.000185228	0.174701	-0.0944812	0.381557	-0.0321539	-0.0819162	-0.107046	-0.236653	0.027569	0.0509704	-0.0958558	-0.191623	0.00589916	-0.00626961	-0.360372	-0.0610057	0.0415433	0.0479083	NA	0.567379	0.256616	0.369572	0.2406	0.121662	0.250867	0.299054
65	ABCD2	-0.0461036	-0.127662	-0.083885	0.0442187	0.139244	0.302285	-0.00292767	0.384779	0.219791	-0.0289107	0.0230553	-0.158273	-0.187112	0.207074	0.0822066	0.00623074	0.186529	0.0919592	-0.0230323	-0.232292	0.227997	-0.395767	NA	0.898794	0.160048	0.378824	0.320309	0.58764	0.356888	0.441249
66	ABCD3	-0.385496	-0.332932	-0.35188	-0.415412	-0.261874	-0.396	-0.702321	-0.301989	-0.49001	-0.791889	-0.612752	-0.421854	-0.41156	-0.323074	-0.585716	-0.245108	-0.382928	-0.140821	-0.413852	-0.252013	-0.566547	-0.137213	NA	0.42229	1.25606	0.882729	0.692673	0.610232	0.63368	0.494276
67	ABCD4	-0.207448	-0.236038	-0.0944684	-0.270485	-0.13125	-0.460234	-0.0240477	-0.501748	-0.41872	-0.26669	0.218595	0.0901932	-0.502248	-0.21029	-0.196522	-0.344448	-0.224085	-0.0384156	-0.136585	-0.335492	-0.0679193	-0.121018	NA	0.565487	0.273224	0.546682	0.739471	0.214069	0.537118	0.289709
68	ABCE1	-1.47928	-2.0468	-1.73129	-2.30394	-1.80985	-1.4326	-2.05889	-1.34057	-1.52463	-2.07585	-2.04192	-1.4412	-1.65452	-1.34212	-1.94349	-2.66439	-2.19409	-1.42561	-1.79408	-2.29952	-1.89541	-1.56717	essential_DepMap	2.76232	4.50934	3.71444	4.9497	4.14509	4.27427	3.04125
69	ABCF1	-1.38535	-1.62839	-1.41435	-1.59055	-1.18235	-1.29194	-1.23924	-0.902093	-1.68179	-1.07191	-1.40656	-1.59141	-1.30471	-1.25994	-1.62763	-1.55348	-1.125	-1.2397	-1.10541	-2.15137	-1.45	-1.37871	essential_DepMap	3.06291	1.88596	3.64397	5.17783	1.99412	4.3332	3.0399
70	ABCF2	0.0029763	-0.0995109	-0.267704	0.0615249	-0.17775	0.247124	-0.312685	-0.0308915	0.525139	-0.498724	-0.126645	-0.0949049	0.069971	0.0338627	-0.0401984	0.163248	-0.00163106	-0.353868	0.0601267	-0.259149	-0.26481	-0.270599	NA	0.502588	0.266317	0.404504	0.474842	0.36232	0.359961	0.453408
71	ABCF3	-0.0609664	-0.011975	-0.0458911	-0.0404491	0.167799	0.216278	0.267469	-0.0980373	0.530594	0.265373	0.269566	0.169579	-0.119777	-0.232702	-0.0468439	-0.0340544	0.132464	0.203134	0.0857333	-0.109683	-0.267791	0.176009	NA	0.746176	1.04669	0.522879	0.231865	0.545773	0.301869	0.514712
72	ABCG1	0.122589	-0.00533601	-0.165905	-0.0807688	0.113927	-0.0581804	-0.0351151	-0.20864	0.0922789	-0.0823006	0.0120704	0.146038	0.0272376	0.194492	0.0134632	-0.175001	0.217134	0.0107194	0.0803406	-0.0910126	-0.00696044	-0.324849	NA	0.398174	0.26397	0.653647	0.331707	0.359491	0.225403	0.217613
73	ABCG2	-0.154385	-0.0789114	0.0588271	0.0231606	0.0724133	-0.422132	-0.158972	-0.172008	-0.672255	0.0732551	-0.391199	0.0911866	-0.186277	-0.368066	-0.0522388	0.0985599	0.100936	0.043891	-0.0535092	-0.104314	0.0462114	0.0714428	NA	0.630846	0.272825	0.402305	0.489938	0.357283	0.272984	0.302522
74	ABCG4	-0.0366953	-0.0113078	0.144841	0.0231625	-0.0288153	-0.0166243	0.17446	0.119889	-0.153138	0.350194	-0.00127302	0.0435295	-0.00847246	-0.145143	-0.0431686	0.0894936	0.183851	-0.241481	-0.00977089	-0.0128447	0.154623	0.13506	NA	0.974702	0.77618	0.29073	0.717922	0.376291	0.282925	0.661852
75	ABCG5	-0.17597	-0.00300519	-0.147469	-0.000259046	-0.200122	-0.349242	0.217059	-0.641698	-0.0567852	0.298705	0.135413	-0.218951	-0.036555	-0.272403	0.0820159	-0.082534	-0.118579	-0.281664	0.0358979	-0.0419083	-0.0490118	-0.245926	NA	0.544067	0.592677	0.35164	0.206262	0.461942	0.538622	0.322083
76	ABCG8	0.0268411	0.15214	0.0180371	0.0646564	0.0325564	-0.165325	0.167236	-0.0944982	-0.236151	0.0463823	0.28809	0.116002	0.0918115	-0.12729	0.151028	-0.0217147	-0.0225807	0.0876935	0.136723	0.167557	-0.193086	0.22916	Nonessential_DepMap	0.273407	0.588616	0.330683	0.438949	0.321928	0.988671	0.423227
77	ABHD1	0.0143202	-0.125176	-0.732703	-0.119597	0.0714653	-0.243639	0.297004	-0.393848	-0.09343	0.156239	0.437769	0.189868	0.0275093	-0.174416	-0.0643816	-0.174812	-0.0251362	0.168067	-0.212727	-0.037626	-0.920892	-0.544514	NA	0.32496	0.554832	0.304518	0.284448	0.361812	0.215233	0.966343
78	ABHD10	-0.0351041	0.0864255	-0.0734631	0.0436845	0.157405	-0.328002	-0.0465324	-0.526574	-0.12943	-0.322701	0.229636	0.0964403	-0.0578588	-0.143894	-0.112284	0.199653	0.11867	0.19614	-0.0849276	0.257779	-0.220353	0.0734266	NA	0.312962	0.369842	0.19382	0.495951	0.260353	0.884606	0.2849
79	ABHD11	-0.150753	-0.338847	-0.156918	-0.00368216	-0.0630189	0.0304376	-0.224657	0.148212	-0.0873368	-0.45708	0.00776609	-0.054037	-0.152025	-0.246197	-0.143815	0.136451	-0.216418	0.0903804	-0.36231	-0.315385	-0.365587	0.0517512	NA	0.365533	0.433191	0.393619	0.265292	0.0866498	0.650664	0.213788
80	ABHD12	0.106554	-0.0193453	-0.017815	0.185747	0.150576	0.330825	-0.249657	0.175995	0.485655	-0.230479	-0.268834	0.141744	0.0467258	0.131191	0.0651206	0.306373	0.0499048	0.251248	-0.209565	0.170874	-0.149605	0.113975	NA	1.01024	0.191489	0.576754	0.632324	0.354568	0.332626	0.41628
81	ABHD12B	0.0571789	0.0762351	-0.00377789	0.186914	-0.371389	-0.261926	0.0440361	-0.317056	-0.206796	0.0846953	0.003377	0.189581	-0.0227595	0.00471534	0.19632	0.177508	-0.18176	-0.561017	-0.00870144	0.161172	0.126692	-0.134248	NA	0.215736	0.132341	0.288193	0.762117	0.44323	0.295271	0.569868
82	ABHD13	0.0151837	0.0427469	0.121921	0.195794	0.131349	0.0866825	0.327597	0.140518	0.0328472	0.296106	0.359088	0.132917	-0.0195405	-0.0678249	0.263198	0.128389	0.0349106	0.227787	0.0418222	0.0436716	0.0287973	0.215045	NA	0.42789	0.927355	0.474955	1.05455	0.589827	0.300245	0.703572
83	ABHD14A	-0.0166825	0.00357842	0.0247988	-0.109223	-0.250395	-0.128096	-0.168647	-0.0372119	-0.21898	-0.298622	-0.0386716	-0.079557	0.01118	0.0183296	-0.0945429	-0.123903	-0.2455	-0.255291	0.0284488	-0.021292	-0.14206	0.191657	NA	0.248328	0.254531	0.387216	0.240725	0.134511	0.299933	0.335908
84	ABHD14B	0.0354062	-0.17832	-0.0319511	-0.137157	0.00852085	0.0185678	-0.171173	0.202036	-0.1649	-0.00133508	-0.341011	-0.0362049	0.0382838	0.10414	-0.1753	-0.0990135	-0.118712	0.135753	-0.111713	-0.244927	-0.0108349	-0.0530674	NA	0.319864	0.389414	0.271646	0.486103	0.393178	0.374209	0.170648
85	ABHD15	-0.0821477	-0.292175	-0.20287	-0.0539983	0.0963432	-0.465724	0.0316847	-0.609683	-0.321764	-0.141992	0.205362	-0.267362	-0.0868801	0.107799	-0.155812	0.0478153	0.240855	-0.0481688	-0.110972	-0.473377	-0.0728198	-0.33292	NA	0.487971	0.929	0.392545	0.679216	0.480307	0.417202	0.497566
86	ABHD16A	-0.13152	0.0468991	-0.0890558	-0.14771	0.066207	0.00396522	0.113151	-0.0142214	0.0221519	0.384001	-0.157698	0.155405	-0.291623	-0.258343	-0.11813	-0.17729	0.149909	-0.017495	0.0529224	0.0408758	-0.0312019	-0.14691	NA	0.334452	0.362933	0.657577	0.203988	0.316953	0.343198	0.49591
87	ABHD16B	0.0223608	0.0915033	0.132309	-0.0221513	0.133476	0.0781709	-0.321929	-0.327582	0.483924	-0.16748	-0.476378	-0.269455	0.173972	0.162566	-0.127677	0.0833743	0.0278482	0.239105	0.255642	-0.0726358	-0.0309345	0.295552	NA	0.354784	0.529259	0.29073	0.160607	0.982139	0.336983	0.415942
88	ABHD17A	-0.507421	-0.872925	-1.12759	-0.358639	-0.140938	-0.858998	-0.616643	-0.869275	-0.84872	-0.332841	-0.900444	-0.807885	-0.381151	-0.333226	-0.458873	-0.258406	-0.251735	-0.0301408	-0.82325	-0.922599	-1.16819	-1.08699	NA	1.02636	0.581997	0.703335	0.74063	0.29149	1.87556	1.88354
89	ABHD17B	-0.0171299	0.0180879	-0.12951	-0.0843226	0.0812949	0.169222	-0.0362613	0.494227	-0.155784	-0.169947	0.097424	-0.0578331	0.0645374	-0.0580941	0.035442	-0.204087	0.197317	-0.0347277	-0.0222182	0.0583939	-0.0502713	-0.208749	NA	0.71119	0.131141	0.354578	0.51944	0.472738	0.186439	0.367062
90	ABHD17C	0.220577	0.241867	0.110583	0.113519	0.27864	0.355571	0.353301	0.353624	0.357517	0.290067	0.416535	0.258933	0.143689	0.259109	0.0978445	0.129193	0.285469	0.27181	0.169918	0.313815	0.225183	-0.00401609	NA	0.97984	0.925001	1.21325	0.578692	1.3489	0.986087	0.579838
91	ABHD18	0.218508	0.176868	0.0179813	0.082978	0.129934	0.349905	0.277559	0.465779	0.23403	0.730795	-0.175676	0.310411	0.235252	0.10986	0.0941019	0.0718541	0.257588	0.00227969	0.25041	0.103326	0.155208	-0.119245	NA	0.853165	0.495521	0.774691	0.358566	0.589561	0.805472	0.409097
92	ABHD2	0.043123	0.00339108	-0.0875232	-0.203115	0.0659533	-0.328326	-0.0121155	-0.473162	-0.183489	0.123857	-0.148088	-0.19939	0.119536	0.209223	-0.184948	-0.221282	0.193894	-0.0619873	0.0214194	-0.0146373	-0.093734	-0.0813124	NA	0.415578	0.33849	0.920819	0.283671	0.468093	0.381225	0.653858
93	ABHD3	0.0479562	-0.0105948	0.170361	0.146699	0.100913	-0.233035	-0.165795	-0.208674	-0.257395	-0.271811	-0.0597782	-0.0303937	0.156889	0.0173735	0.241619	0.0517791	0.0704297	0.131396	0.126	-0.14719	0.11792	0.222802	NA	0.440442	0.258391	0.232844	1.59109	0.195312	0.262287	0.351664
94	ABHD4	-0.0536433	-0.161498	0.12449	-0.259636	-0.0373712	-0.532373	-0.357946	-0.774825	-0.289922	-0.0468633	-0.669028	-0.375297	0.0837605	0.130607	-0.380141	-0.139131	-0.30392	0.229178	-0.260946	-0.0620491	0.00274658	0.246233	NA	0.436307	0.621543	0.329754	0.6111	0.467099	0.385235	0.374127
95	ABHD5	-0.191398	0.0934111	-0.121828	0.0740062	-0.20914	0.10039	-0.666496	0.154209	0.0465705	-0.760658	-0.572333	-0.355649	0.0111349	-0.229681	0.0752876	0.0727248	-0.214862	-0.203419	-0.0392665	0.226089	0.057203	-0.30086	NA	0.375388	1.15852	0.342944	0.251955	0.583147	0.497232	0.397837
96	ABHD6	0.135293	0.0719465	0.112996	0.232682	0.181417	0.241173	0.153832	0.248533	0.233814	0.130666	0.176997	0.0784989	0.188092	0.139288	0.321125	0.144239	0.269068	0.0937672	0.145298	-0.00140502	0.0855982	0.140393	NA	0.724458	0.459176	0.632644	0.933125	0.715107	0.678837	0.28954
97	ABHD8	-0.311842	-0.394656	-0.213415	-0.486322	-0.42755	-0.456028	-0.26558	-0.381636	-0.53042	0.0480166	-0.579176	-0.219378	-0.402588	-0.31356	-0.460136	-0.512507	-0.545268	-0.309832	-0.434157	-0.355155	-0.160503	-0.266328	NA	0.674484	0.331978	0.583359	1.2263	0.610222	0.896694	0.293632
98	ABI1	-0.230831	-0.116285	0.0359228	-0.275122	-0.320228	-0.547799	-0.360653	-0.504546	-0.591052	-0.465828	-0.255479	-0.348888	-0.203618	-0.139986	-0.164793	-0.38545	-0.597678	-0.0427788	-0.151273	-0.0812962	-0.0730679	0.144914	NA	1.22109	0.369028	0.530178	0.396401	0.494127	0.123537	0.183918
99	ABI2	0.112679	-0.00693068	0.157595	0.00789501	-0.121535	0.0938179	-0.369325	0.0653773	0.122259	-0.219085	-0.519565	0.189194	0.220588	-0.0717452	-0.0159263	0.0317163	0.0188028	-0.261873	-0.167354	0.153492	0.147804	0.167386	NA	0.275294	0.697615	0.772113	0.275139	0.362005	1.16325	0.506856
100	ABI3	-0.226643	-0.115914	0.02479	-0.136059	-0.186002	-0.345859	0.0685687	-0.233683	-0.458036	0.250508	-0.113371	-0.256761	-0.156485	-0.266682	-0.142814	-0.129304	-0.219399	-0.152606	-0.0337066	-0.198121	-0.034481	0.084061	NA	0.626978	0.522777	0.537602	0.434118	0.581218	0.502172	0.318845
101	ABI3BP	-0.0674092	-0.103829	-0.302321	-0.357135	0.0367123	-0.483818	-0.0915025	-0.872784	-0.0948527	-0.373652	0.190647	-0.166374	0.0988487	-0.134702	-0.371643	-0.342627	0.121738	-0.0483134	-0.188854	-0.018803	-0.365843	-0.238798	NA	0.595911	0.715976	0.279014	0.544881	0.416915	0.200584	0.581649
102	ABL1	0.023501	-0.113001	0.0155011	-0.0226775	0.0568477	0.105444	0.250385	0.315773	-0.104886	0.366981	0.133789	-0.151079	-0.117062	0.338644	-0.146241	0.100886	0.223957	-0.110261	-0.254336	0.0283343	-0.152357	0.183359	NA	0.68202	0.563387	0.249492	0.364597	0.429644	0.25825	0.200863
103	ABL2	-0.0309644	0.190676	-0.174338	-0.158008	-0.0468097	-0.196727	0.163164	-0.274389	-0.119066	0.330201	-0.00387298	-0.0812578	0.0936006	-0.105236	-0.195437	-0.120578	-0.0926643	-0.00095499	0.13126	0.250092	-0.0621372	-0.28654	NA	0.240529	0.594833	0.280669	0.64885	1.04151	0.907507	0.176813
104	ABLIM1	-0.180094	-0.296448	-0.227666	-0.255696	-0.446751	-0.150061	-0.284717	-0.350068	0.049947	-0.324615	-0.244819	-0.289744	0.158565	-0.409102	-0.27747	-0.233923	-0.416716	-0.476786	-0.375333	-0.217563	0.413715	-0.869048	NA	0.485293	0.427814	0.443697	0.685996	0.772935	0.385161	0.514236
105	ABLIM2	0.149105	-0.0405576	-0.550083	0.00927868	-0.0562086	-0.175271	-0.0164329	-0.0330071	-0.317534	-0.223887	0.191021	0.34548	-0.0392108	0.141047	0.0660384	-0.047481	-0.470007	0.35759	-0.116664	0.0355489	-0.81129	-0.288876	NA	0.395438	0.456466	0.505845	0.507065	0.469019	0.138558	0.663082
106	ABLIM3	0.0848403	0.0939337	0.298302	0.00823956	0.179292	0.00770169	0.311425	0.11583	-0.100427	0.590594	0.0322562	0.0150472	0.129191	0.110283	0.00492914	0.01155	0.196237	0.162347	0.112284	0.0755831	0.240232	0.356372	NA	0.348785	0.46424	0.66354	0.454754	0.63988	0.727601	1.18636
107	ABO	0.0585589	0.168621	0.252081	0.163541	0.0603193	0.163002	-0.316159	0.340082	-0.0140784	0.0484913	-0.68081	-0.119874	0.105323	0.190228	0.0616819	0.265401	0.164137	-0.0434987	-0.00426696	0.341508	0.426665	0.0774972	NA	0.521903	0.249191	0.386158	0.900325	0.490858	0.523321	0.624677
108	ABR	-0.0189073	0.119371	-0.115322	-0.16056	-0.107248	-0.420582	-0.0720519	-0.841434	0.000270958	0.181992	-0.326095	-0.123716	0.262513	-0.195519	0.0900494	-0.41117	-0.0497849	-0.164711	0.00790477	0.230836	-0.388207	0.157564	NA	0.527441	0.474612	0.309804	0.394555	0.372772	0.43041	0.471861
109	ABRA	-0.0110566	0.0470283	0.0238189	0.0216584	-0.00867756	0.00282808	-0.000404131	0.159048	-0.153392	-0.287166	0.286358	0.0311685	-0.111858	0.0475193	0.13946	-0.0961432	-0.12262	0.105265	0.110564	-0.0165071	0.0623724	-0.0147345	NA	0.2105	0.295476	0.356547	0.324048	0.319483	0.354686	0.402014
110	ABRACL	0.153504	-0.0542956	0.0220476	0.01518	-0.0763467	0.295188	0.0162803	0.541103	0.0492741	-0.167036	0.199597	0.316791	0.252978	-0.109256	-0.065393	0.095753	-0.120562	-0.0321312	0.0124526	-0.121044	0.208171	-0.164076	NA	0.504904	0.46147	1.10292	0.421831	0.229277	0.270163	0.508372
111	ABRAXAS1	-0.0755931	-0.132599	0.133162	-0.0474931	0.00619039	-0.26651	0.0544165	-0.360721	-0.172299	0.10672	0.00211332	-0.152033	-0.0547713	-0.0199752	-0.115335	0.0203484	-0.0623241	0.0747048	-0.164255	-0.100943	0.337072	-0.070749	NA	0.544584	0.29347	0.2652	0.516879	0.229056	0.521737	0.549777
112	ABRAXAS2	0.158477	0.268325	0.196954	0.0296827	0.123644	-0.0216484	0.135378	0.0527755	-0.0960723	0.0524137	0.218343	0.208856	0.16382	0.102756	0.0505555	0.00880999	-0.0203929	0.267682	0.265372	0.271278	0.154456	0.239453	NA	0.550583	0.442613	1.00218	0.579854	0.343471	1.51516	0.613974
113	ABT1	-0.901921	-0.512991	-1.52747	-0.93643	-1.04278	-0.775078	-1.08611	-1.01379	-0.536368	-1.49613	-0.67608	-0.909426	-0.743262	-1.05308	-0.833282	-1.03958	-1.49501	-0.590552	-0.436192	-0.58979	-1.56733	-1.4876	essential_DepMap	0.885961	1.24605	1.9431	1.57913	1.20674	0.953152	2.29658
114	ABTB1	0.104526	-0.267115	-0.0704146	-0.182305	-0.195126	0.148586	-0.281459	0.431895	-0.134724	-0.477673	-0.0852451	0.112662	0.0337845	0.167132	-0.59928	0.234671	-0.274425	-0.115827	-0.242383	-0.291847	-0.131992	-0.00883682	NA	0.685875	0.364124	0.527244	0.343954	0.422072	0.351016	0.16304
115	ABTB2	0.293552	0.0720384	0.351192	0.111619	0.155267	-0.209665	0.0783506	0.0469734	-0.466303	0.230476	-0.073775	0.367248	0.30573	0.207678	0.110765	0.112473	0.137473	0.173062	0.0298967	0.11418	0.251035	0.45135	NA	0.364667	0.543725	1.68403	0.580689	0.696404	0.805488	1.82908
116	ACAA1	-0.117325	-0.237253	-0.0496636	-0.113399	0.0484262	-0.018849	-0.282865	0.492301	-0.529999	0.026867	-0.592596	-0.374664	-0.128369	0.151058	-0.194799	-0.0319982	-0.216335	0.313188	-0.0835504	-0.390956	-0.021616	-0.0777113	NA	0.435086	0.524746	0.284833	0.222961	0.472587	0.483253	0.278037
117	ACAA2	0.0457634	0.156442	0.128425	-0.0257429	0.327406	-0.157317	-0.185508	-0.331538	0.0169045	0.00239972	-0.373415	0.0630043	0.12324	-0.0489545	0.0346852	-0.0861709	0.393505	0.261308	-0.00565116	0.318534	-0.159333	0.416184	NA	0.152612	0.203571	0.314258	0.100352	1.14219	1.16067	0.530405
118	ACACA	-0.715457	-0.963315	-1.35032	-0.894004	-0.926482	-1.26197	-1.05572	-1.01121	-1.51273	-0.971205	-1.14024	-0.792217	-0.70742	-0.646736	-1.13138	-0.65663	-0.93482	-0.918144	-0.790167	-1.13646	-1.30275	-1.3979	NA	3.60511	1.88815	2.72584	2.26504	1.7396	2.37429	2.9702
119	ACACB	0.138471	-0.308353	-0.264737	0.205788	-0.0607248	0.0438458	0.179571	0.122813	-0.0351218	0.102494	0.256649	0.0554971	0.183739	0.176176	0.0171283	0.394449	-0.425973	0.304523	-0.0351236	-0.581582	-0.243986	-0.285488	NA	0.257196	0.718115	0.657577	0.610348	0.300213	0.352294	0.480251
120	ACAD10	-0.0770933	-0.0150874	0.0786369	-0.100149	-0.133434	-0.469294	0.118264	-0.680833	-0.257755	0.184785	0.0517433	-0.0878463	0.00306535	-0.146499	0.0403229	-0.240621	-0.140578	-0.126291	0.0318272	-0.062002	0.0545347	0.102739	NA	0.523103	0.309862	0.329754	0.26528	0.160283	0.288235	0.382994
121	ACAD11	-0.042654	0.0811932	0.0177564	0.128708	0.0660037	0.428733	0.219988	0.0464574	0.811008	0.0585696	0.381407	-0.0913639	0.0542864	-0.0908846	0.00829629	0.249119	0.0260722	0.105935	0.0627356	0.0996509	-0.0166017	0.0521144	NA	0.655451	0.612121	0.271646	0.348494	0.668549	0.292553	0.589729
122	ACAD8	0.240849	0.141261	0.280249	0.129603	0.0784505	0.411029	0.262207	0.499147	0.322912	0.281825	0.242589	0.279908	0.215804	0.226834	0.248788	0.0104174	0.017536	0.139365	0.149879	0.132642	0.179859	0.380638	NA	1.32578	0.637404	1.64589	0.487983	0.228042	0.74869	0.939742
123	ACAD9	-0.0817644	-0.0892371	-0.0161092	-0.296533	-0.269964	-0.122506	-0.249423	-0.0060492	-0.238963	-0.690398	0.191553	0.0206943	-0.218719	-0.0472681	-0.576705	-0.0163614	-0.344461	-0.195467	-0.128777	-0.0496971	-0.241453	0.209235	NA	0.298765	0.273833	0.4698	0.523882	0.48815	0.357585	0.350967
124	ACADL	-0.0118335	0.19125	0.0538319	0.0502002	-0.227081	-0.130835	-0.125225	-0.480787	0.219118	-0.0755727	-0.174878	0.0527635	-0.0631492	-0.0251149	0.149281	-0.048881	-0.29235	-0.161812	0.0460678	0.336431	0.272439	-0.164775	NA	0.450925	0.334841	0.380907	0.520367	0.356972	0.39544	0.338802
125	ACADM	-0.0690983	-0.0680538	0.0484503	-0.156121	0.0387356	0.0198959	-0.0934538	-0.00248538	0.0422772	-0.147051	-0.0398569	0.0982271	0.00764218	-0.313164	-0.0507674	-0.261475	0.27365	-0.196179	-0.0886171	-0.0474905	0.267562	-0.170661	NA	0.159794	0.364357	0.209012	0.201498	0.306691	0.192539	0.317422
126	ACADS	-0.0780607	-0.0332601	-0.0496177	0.0054367	-0.168	0.345595	0.00749288	0.173886	0.517304	0.0280071	-0.0130214	-0.136038	0.0357393	-0.133883	0.089376	-0.0785026	-0.242855	-0.0931444	-0.0532973	-0.013223	0.00902298	-0.108258	NA	1.28919	0.288543	0.432974	0.479785	0.381398	0.459295	0.368774
127	ACADSB	0.0338453	-0.155855	-0.393956	0.0358692	0.00732324	-0.0271859	-0.447516	-0.113102	0.0587306	-0.504444	-0.390588	-0.311079	0.23284	0.179774	0.00303222	0.0687062	-0.0269117	0.0415582	-0.129197	-0.182512	-0.663518	-0.124394	NA	0.333061	0.640373	0.392545	0.43563	0.282176	0.207395	0.60873
128	ACADVL	-0.111829	-0.151508	0.21602	-0.0423492	-0.100663	-0.719835	-0.283068	-0.310222	-1.12945	-0.31193	-0.254207	0.00363095	-0.266177	-0.0729417	0.193436	-0.278134	-0.169751	-0.0315747	-0.166423	-0.136593	0.193488	0.238553	NA	0.439986	0.371662	0.193142	0.274534	0.385936	0.174074	0.467877
129	ACAN	-0.112514	4.32141e-05	-0.0213429	0.208794	-0.0647489	0.167174	0.114439	0.228444	0.105905	0.0958942	0.132984	-0.290017	-0.0406752	-0.00684842	0.0504243	0.367164	-0.286459	0.156961	-0.170137	0.170224	0.0621688	-0.104855	NA	0.497	0.444398	0.563837	0.65215	0.450301	0.243349	0.593383
130	ACAP1	-0.143011	0.0718558	-0.0199405	0.133847	0.107227	-0.211543	-0.0311663	-0.286417	-0.136669	-0.110906	0.0485733	-0.255321	-0.23072	0.0570064	0.0835177	0.184176	0.0580808	0.156374	-0.0462182	0.18993	-0.297941	0.25806	NA	0.369603	0.775881	0.271646	0.606565	0.614456	0.71622	0.296382
131	ACAP2	0.0799774	-0.056728	-0.0451698	-0.0163873	-0.0503716	-0.0709615	-0.0690542	0.0914523	-0.233375	-0.183986	0.0458777	0.216797	-0.0507232	0.0738588	0.0274443	-0.0602189	0.0147127	-0.115456	-0.0672169	-0.0462392	0.0364992	-0.126839	NA	0.185446	0.390038	0.539102	0.509192	0.150043	0.134653	0.26704
132	ACAP3	-0.0279905	0.0102497	-0.00683832	-0.0782125	-0.100809	0.355416	0.0506632	0.236917	0.473915	0.248228	-0.146902	-0.0305051	-0.0727057	0.0192394	-0.128761	-0.0276636	0.0701937	-0.271812	-0.0447802	0.0652796	-0.0133376	-0.000339033	NA	0.990932	0.539508	0.35164	0.630348	0.412817	0.661484	0.393221
133	ACAT1	-0.0209664	-0.203515	0.0590374	0.0653854	-0.053868	0.355283	0.140116	0.196566	0.514	-0.0633363	0.343568	0.0392758	-0.0181933	-0.0839818	-0.12487	0.255641	-0.150944	0.0432079	-0.42356	0.0165292	0.152028	-0.0339529	NA	0.815249	0.279307	0.326979	0.309724	0.203978	0.295065	0.558855
134	ACAT2	0.078871	0.42054	0.378497	0.103648	0.0249489	0.084228	0.502675	0.153773	0.0146828	0.711222	0.294128	0.172986	-0.0708139	0.13444	-0.0669639	0.27426	0.10147	-0.0515718	0.2213	0.619781	0.317846	0.439149	NA	0.988516	0.820405	0.607303	0.820868	0.914925	0.976713	0.945393
135	ACBD3	0.264906	0.111804	0.224587	0.0144677	0.173468	0.269166	0.383237	0.110773	0.427558	0.2113	0.555173	0.083986	0.343494	0.36724	-0.00041836	0.0293538	0.298108	0.0488274	0.154789	0.068819	0.205001	0.244174	NA	0.717769	0.628551	1.02182	0.365724	0.833967	0.770289	0.986404
136	ACBD4	-0.354467	-0.262022	-0.273475	-0.233573	-0.0658912	-0.17728	-0.237566	-0.0348636	-0.319697	-0.141245	-0.333887	-0.28361	-0.539866	-0.239926	-0.185401	-0.281745	0.111103	-0.242885	-0.254448	-0.269595	-0.0339103	-0.513039	NA	0.179983	0.218126	0.815309	0.419337	0.205007	0.428181	0.278305
137	ACBD5	-0.0528002	0.143742	0.251402	-0.045047	0.248544	0.0127021	0.324885	0.125336	-0.0999318	0.234593	0.415177	-0.0660093	-0.0598189	-0.0325723	-0.0972843	0.00719035	0.172574	0.324515	0.228483	0.0590017	0.25539	0.247415	NA	0.281245	0.890292	0.228413	0.289976	1.07953	0.531198	0.824503
138	ACBD6	0.111321	0.0386152	0.0503804	0.157821	0.128643	0.435822	0.502615	0.521312	0.350332	0.457273	0.547957	0.200369	-0.0527468	0.186341	0.193561	0.122081	0.114609	0.142677	0.0141172	0.0631131	0.0471722	0.0535887	NA	1.56808	1.12428	0.730487	1.10396	0.316246	0.483524	0.274056
139	ACBD7	0.146357	0.260298	0.0183422	-0.1021	0.0627298	0.32262	0.0960208	0.275514	0.369725	0.326364	-0.134322	0.180074	0.115991	0.143008	-0.186492	-0.0177083	0.0379243	0.0875352	0.269932	0.250664	-0.0323355	0.06902	NA	0.963028	0.342337	0.829738	0.208667	0.394197	1.44434	0.24649
140	ACCS	0.091365	0.0241583	0.0260429	-0.157075	0.0319313	0.121639	0.12979	-0.186261	0.42954	-0.0837303	0.34331	0.198635	-0.00581794	0.081278	-0.0352245	-0.278926	0.00446266	0.0594	-0.0264156	0.0747322	-0.128525	0.180611	NA	0.347338	0.280544	0.454693	0.412361	0.422957	0.565426	0.377584
141	ACCSL	-0.151035	-0.100961	-0.225793	-0.119221	0.0390177	-0.345053	-0.145251	-0.209901	-0.480205	-0.0560131	-0.234489	-0.236873	-9.34316e-05	-0.216138	-0.11432	-0.124122	0.0904868	-0.0124515	0.00776908	-0.20969	-0.042902	-0.408684	Nonessential_DepMap	0.40794	0.329022	0.348722	0.18695	0.304426	0.153613	0.377036
142	ACD	-0.128776	-0.0155158	-0.124949	-0.0790251	-0.2199	-0.0551918	-0.0187632	-0.0977328	-0.0126509	-0.105968	0.0684414	-0.116404	-0.264766	-0.00515847	-0.0539799	-0.10407	-0.302194	-0.137605	-0.0773631	0.0463315	0.0329119	-0.28281	NA	0.203138	0.327067	0.402305	0.169498	0.314998	0.266843	0.415019
143	ACE	-0.364196	-0.197811	0.0647469	-0.115864	-0.564174	-0.252032	-0.140868	-0.17789	-0.326174	-0.543287	0.261551	-0.192089	-0.371185	-0.529312	-0.156837	-0.0748913	-0.793654	-0.334693	-0.211244	-0.184378	0.190976	-0.0614821	NA	0.266345	0.537265	0.623423	0.279535	0.917215	0.387116	0.329351
144	ACE2	0.139169	0.262761	0.346964	0.174827	0.132458	0.155432	0.275509	0.614604	-0.30374	0.155796	0.395222	0.125503	0.406769	-0.114765	0.0625699	0.287083	-0.110486	0.375403	0.155727	0.369794	0.486703	0.207224	NA	0.320168	1.2757	0.463442	0.697957	0.58155	1.06267	0.919835
145	ACER1	0.104702	-0.20838	0.100092	-0.0512054	0.181496	-0.5302	-0.333177	-0.658634	-0.401766	-0.20029	-0.466063	0.293963	0.0506419	-0.0304996	0.017772	-0.120183	0.120471	0.242521	0.0144739	-0.431234	-0.05361	0.253794	NA	0.724723	0.342246	0.473661	0.352847	0.69935	0.470287	0.888032
146	ACER2	0.172383	0.359577	-0.0617389	0.19113	0.188407	-0.179132	0.0750439	-0.449942	0.0916781	0.111226	0.0388621	0.294456	0.305339	-0.0826456	0.126802	0.255458	0.484579	-0.107766	0.395321	0.323833	-0.327417	0.20394	NA	0.304737	0.359082	0.665546	0.813212	0.963135	1.19679	0.400193
147	ACER3	0.0387402	-0.168888	0.19659	0.104053	-0.103129	0.0537938	-0.0329443	0.305144	-0.197556	0.091824	-0.157713	0.150171	0.0439493	-0.0779001	-0.0283126	0.236418	-0.0154061	-0.190851	-0.241865	-0.0959113	0.441734	-0.0485543	NA	0.655009	0.44676	0.496209	0.535034	0.24144	0.24657	0.752471
148	ACHE	-0.429354	0.0205394	0.198508	0.0286082	-0.287732	0.220339	-0.502481	-0.180383	0.621061	-0.41458	-0.590383	-0.316572	-0.523432	-0.448058	-0.0684574	0.125674	-0.256996	-0.318468	-0.160506	0.201585	0.31805	0.078966	NA	0.548382	0.504268	0.737549	0.274803	0.813058	0.280246	0.461213
149	ACIN1	-0.0280968	-0.184034	0.0155414	0.0564886	-0.0127734	0.254936	-0.256323	0.0421804	0.467691	-0.471478	-0.0411688	0.0665179	-0.0657785	-0.0850298	0.0834164	0.0295609	-0.11701	0.0914635	-0.305704	-0.0623635	0.102558	-0.0714753	NA	0.653214	0.315397	0.289883	0.623469	0.264389	0.312479	0.239966
150	ACKR1	0.0645372	0.0359307	0.0152309	0.229747	0.111371	0.0293135	-0.00451642	0.139899	-0.0812716	0.476316	-0.485349	0.121836	-0.104198	0.175974	0.373283	0.0862117	0.0936082	0.129134	0.0253083	0.0465531	0.0819065	-0.0514448	NA	0.271135	0.400581	0.55752	1.19157	0.491495	0.377201	0.602418
151	ACKR2	-0.0616448	-0.0170113	0.0744631	-0.0779821	0.0730848	0.0272248	-0.179952	0.207471	-0.153022	-0.24311	-0.116795	-0.0545181	-0.0500065	-0.0804098	0.057701	-0.213665	-0.0127409	0.158911	-0.0843295	0.050307	-0.128468	0.277394	NA	0.440686	0.307536	0.229885	0.397479	0.290573	0.390182	0.441694
152	ACKR3	0.173081	0.178058	-0.0348002	0.00302792	0.0117225	0.0366364	0.15361	-0.155518	0.228791	0.619039	-0.31182	0.0071199	0.319096	0.193028	-0.0281934	0.0342493	0.0705208	-0.0470757	0.293168	0.0629486	0.0709515	-0.140552	NA	0.519926	0.791097	0.449772	0.329522	0.261751	0.531917	0.149498
153	ACKR4	0.260368	0.133814	0.0837959	0.0494972	0.226904	-0.0464727	0.129627	-0.0659414	-0.0270039	0.18361	0.0756439	0.290676	0.236034	0.254395	0.140509	-0.0415145	0.240694	0.213115	0.0753746	0.192254	0.0634219	0.10417	NA	0.345135	0.479431	1.7167	0.775169	0.936235	0.899881	0.583892
154	ACLY	-0.43737	-0.880506	-0.820363	-0.594381	-0.311357	-0.559308	-0.370446	-0.260319	-0.858297	-0.559256	-0.181635	-0.40882	-0.344779	-0.558512	-0.892222	-0.296541	-0.313649	-0.309066	-1.33245	-0.428567	-0.832438	-0.808288	NA	0.733134	0.313829	0.744727	0.761941	0.494646	1.79072	1.91957
155	ACMSD	0.0308882	0.0409992	0.33611	0.131939	0.103071	-0.20595	-0.105773	-0.00278007	-0.409119	0.0904465	-0.301993	-0.12499	0.105747	0.111908	0.0673793	0.196499	-0.303014	0.509156	-0.0407835	0.122782	0.106271	0.565949	NA	0.303246	0.413165	0.408935	0.711941	0.582126	0.524256	0.556963
156	ACO1	0.0121579	0.00263019	-0.37926	-0.213618	-0.157013	-0.0970621	0.189651	-0.445746	0.251621	0.130409	0.248893	-0.168427	0.0847213	0.12018	-0.198506	-0.228729	-0.344304	0.0302775	0.331056	-0.325796	-0.470062	-0.288458	NA	0.428396	0.445662	0.5157	0.487703	0.22636	0.312287	0.506396
157	ACO2	-1.26605	-1.17318	-0.771696	-1.15904	-0.864669	-1.51995	-0.796817	-1.16056	-1.87933	-0.565241	-1.02839	-1.50267	-1.34109	-0.954377	-1.19473	-1.12336	-0.53405	-1.19529	-1.14248	-1.20389	-0.830662	-0.71273	essential_DepMap	2.12371	1.03235	2.37986	2.3479	1.0735	2.323	1.04467
158	ACOD1	0.122668	0.0689314	-0.175881	0.118885	0.113411	-0.206436	-0.0380445	0.143694	-0.556566	-0.422985	0.346896	0.0288483	0.373889	-0.0347329	0.0934165	0.144354	0.000927306	0.225895	0.089944	0.0479188	-0.319815	-0.0319469	NA	0.295952	0.254742	0.74958	0.600958	0.270661	0.498934	0.288518
159	ACOT1	0.170561	0.195385	-0.181053	0.131174	0.218747	0.337654	0.359606	0.46555	0.209758	0.561184	0.158027	0.126929	0.248432	0.13632	0.00251791	0.25983	0.213131	0.224362	0.209521	0.181249	-0.865073	0.502966	NA	0.631809	1.32556	0.939302	0.42856	0.589197	0.840613	0.351393
160	ACOT11	0.058337	-0.122187	-0.147682	0.0260808	0.0051434	-0.127758	0.149299	0.105889	-0.361404	0.313328	-0.01473	-0.0431528	0.0896115	0.128552	0.0537855	-0.0016239	-0.181462	0.191749	-0.258393	0.0140195	0.0685653	-0.363929	NA	0.278791	0.371065	0.467246	0.283125	0.334973	0.357367	0.519971
161	ACOT12	0.027899	-0.0964213	0.11172	0.0823934	-0.00282401	-0.232927	0.153004	-0.372142	-0.0937124	0.0663365	0.239671	0.0732585	0.168425	-0.157987	0.0702577	0.0945291	-0.329459	0.323811	-0.243922	0.0510792	0.26386	-0.0404192	NA	0.41675	0.328138	0.37366	0.4117	0.500258	0.684135	0.592737
162	ACOT13	-0.0560223	0.000433354	-0.406916	-0.135421	-0.194321	0.0508368	0.0312289	0.0958669	0.00580667	0.108268	-0.0458105	-0.0179114	-0.284811	0.134655	-0.11395	-0.156893	-0.263301	-0.125341	-0.10399	0.104856	-0.591407	-0.222424	NA	0.293073	0.477536	0.30103	0.261212	0.47055	0.341993	0.638716
163	ACOT2	-0.0318128	0.0450976	0.00654645	0.0476734	0.0315119	0.171209	-0.00634063	0.018268	0.324149	0.0676206	-0.0803018	-0.223625	0.0151777	0.113009	0.141981	-0.046634	0.0180079	0.0450158	0.0605953	0.0295999	-0.0583716	0.0714645	NA	0.697258	0.236044	0.268411	0.594375	0.354052	0.36198	0.27291
164	ACOT4	0.0974773	0.107077	0.084026	0.135317	0.161539	-0.150995	-0.0824313	-0.47588	0.173891	-0.0873958	-0.0774668	-0.0935408	0.229308	0.156664	0.188722	0.081913	-0.00943037	0.332509	0.130785	0.0833697	0.186219	-0.0181671	NA	0.339542	0.139617	0.50307	0.752051	0.972282	0.763223	0.42461
165	ACOT6	-0.000392082	0.0526905	0.236628	0.0811588	0.0232347	0.161468	0.26048	0.141343	0.181593	0.529891	-0.00893057	0.13273	-0.0416579	-0.0922482	0.172184	-0.0098664	0.0901308	-0.0436615	0.0336877	0.0716934	0.277122	0.196134	NA	0.608527	0.589974	0.477556	1.30317	0.283071	0.322142	0.837421
166	ACOT7	-0.175641	0.140301	0.0374252	0.0763316	0.0636373	0.0779773	0.309023	0.0765687	0.0793859	0.60689	0.0111553	-0.106141	-0.0401551	-0.380628	0.127529	0.0251342	0.134927	-0.00765263	-0.00287437	0.283477	0.183201	-0.108351	NA	0.353902	0.497325	0.25649	0.407479	0.206454	0.502739	0.29292
167	ACOT8	-0.0248479	-0.362228	0.0239111	-0.113515	0.00811377	-0.244476	0.219019	-0.290339	-0.198613	-0.094881	0.532919	0.203809	-0.113276	-0.165077	-0.14546	-0.0815708	-0.0571651	0.0733926	-0.609346	-0.11511	-0.19201	0.239832	NA	0.651199	0.425713	0.437707	0.5133	0.672371	0.501689	0.331218
168	ACOT9	0.124663	0.024525	-0.0692949	0.0099833	0.0753952	0.0883252	0.250647	0.246297	-0.0696465	0.218912	0.282383	0.0967203	0.144319	0.13295	-0.0618428	0.0818094	0.110465	0.0403252	0.0494462	-0.000396124	0.059866	-0.198456	NA	0.276811	0.970659	0.899629	0.180456	0.342915	0.256612	0.0740102
169	ACOX1	-0.404309	-0.527885	-0.37841	-1.03686	-0.429686	-0.694902	0.0909597	-0.429841	-0.959963	0.227262	-0.0453426	-0.41508	-0.507993	-0.289853	-0.886918	-1.18681	-0.390917	-0.468455	-0.37136	-0.68441	-0.45919	-0.297629	NA	1.83748	0.228082	0.987163	1.92859	0.652085	1.05379	0.493116
170	ACOX2	0.0546531	0.0440619	-0.151055	-0.270838	-0.426615	-0.131217	-0.134932	-0.431688	0.169253	0.249069	-0.518932	-0.0152725	0.0564069	0.122825	-0.0389302	-0.502746	-0.207816	-0.645414	0.119468	-0.0313438	-0.157103	-0.145007	NA	0.339286	0.348107	0.325139	0.38512	0.391895	0.515857	0.187789
171	ACOX3	0.0879249	0.196592	0.398538	0.122405	0.195401	-0.169436	-0.187322	-0.239164	-0.0997083	0.251162	-0.625806	0.161685	0.0815406	0.0205486	0.0512646	0.193546	0.249992	0.140811	0.118195	0.274989	0.5632	0.233875	NA	0.159223	0.381617	0.421361	0.399708	0.863264	0.969429	1.26129
172	ACOXL	-0.216196	-0.0103038	0.354503	-0.245055	-0.469733	-0.139095	-0.272794	-0.397781	0.119591	-0.0892216	-0.456366	-0.0893051	-0.247239	-0.312043	-0.231826	-0.258284	-0.632783	-0.306683	0.177228	-0.197835	0.351609	0.357396	NA	0.258837	0.384829	0.276544	0.430369	0.750533	0.244815	1.0616
173	ACP1	0.125965	0.202769	0.274866	0.311895	0.0552536	0.256456	-0.180583	0.346423	0.166489	0.0995987	-0.460766	-0.195049	0.387672	0.185273	0.306542	0.317248	0.122032	-0.0115247	0.189223	0.216314	0.230206	0.319525	NA	0.45185	0.376348	0.645892	1.59438	0.556784	0.9281	0.879936
174	ACP2	-0.0832038	0.0943732	-0.172092	0.0606224	-0.123887	-0.547239	-0.186059	-0.65383	-0.440649	0.0645465	-0.436664	-0.421461	0.0652994	0.10655	-0.0626384	0.183883	-0.383449	0.135674	0.12514	0.0636065	-0.19096	-0.153224	NA	0.788439	0.46083	0.308035	0.211623	0.244194	0.193227	0.403958
175	ACP4	-0.209455	-0.41751	-0.339324	-0.196614	-0.112274	-0.209078	-0.682349	-0.324246	-0.0939095	-0.419328	-0.94537	-0.149859	-0.111198	-0.367307	-0.320069	-0.073159	-0.0984021	-0.126145	-0.148259	-0.686762	-0.205946	-0.472702	NA	0.180371	0.877481	0.429457	0.366052	0.303862	0.51758	0.385583
176	ACP5	-0.136302	-0.152297	-0.0494379	-0.0469201	0.1434	0.0591324	-0.275644	0.229418	-0.111153	-0.348009	-0.203278	-0.20605	-0.0128478	-0.190007	-0.0219776	-0.0718627	-0.0480574	0.334858	-0.229457	-0.0751362	-0.154226	0.0553502	NA	0.946426	0.325952	0.480172	0.66291	0.326354	0.301943	0.301913
177	ACP6	-0.20269	-0.85351	-0.350154	-0.220381	-0.0959427	-0.139384	-0.169721	-0.0331493	-0.245619	-0.0969729	-0.242468	-0.272769	-0.0694972	-0.265803	-0.185747	-0.255015	0.00945935	-0.201345	-1.29593	-0.411084	0.249176	-0.949484	NA	0.790405	0.188157	0.279014	0.315905	0.233821	0.783122	0.639104
178	ACP7	-0.249489	-0.199919	-0.250529	-0.267426	0.0753426	-0.0832023	0.191817	0.116897	-0.283301	0.453584	-0.0699502	-0.270642	-0.117662	-0.360163	-0.248876	-0.285977	0.040876	0.109809	-0.210104	-0.189734	-0.37907	-0.121988	NA	0.226832	0.303293	0.428291	0.823186	0.28454	0.455101	0.313292
179	ACPP	0.0995504	0.230543	-0.085177	0.16996	0.127198	0.131945	0.0746119	0.15414	0.10975	0.504676	-0.355452	-0.137005	0.284638	0.151018	0.131438	0.208482	0.280982	-0.0265862	0.259265	0.201821	-0.260361	0.090007	NA	0.39262	0.427982	0.387216	0.669099	0.652708	0.902403	0.289861
180	ACR	-0.249913	-0.370144	-0.223943	-0.253483	-0.243952	-0.253977	-0.0563703	-0.0789595	-0.428994	0.013229	-0.12597	-0.0344541	-0.30353	-0.411754	-0.113459	-0.393506	-0.051309	-0.436595	-0.075006	-0.665283	-0.278266	-0.16962	NA	0.293436	0.290531	0.578396	0.498824	0.455777	0.344208	0.276865
181	ACRBP	-0.0713427	-0.00613138	0.057972	-0.155637	-0.260078	-0.252191	0.0948175	-0.408984	-0.0953982	0.38804	-0.198405	0.0504367	-0.0658169	-0.198648	-0.0660437	-0.24523	-0.60455	0.0843943	-0.0648006	0.0525379	-0.0418697	0.157814	NA	0.415008	0.295721	0.254925	0.302178	0.277264	0.159954	0.317079
182	ACRV1	0.173503	0.289897	-0.145184	0.113348	0.394994	0.180808	0.387429	-0.0457075	0.407323	0.366747	0.408111	0.0453163	0.206209	0.268985	0.176427	0.0502691	0.502173	0.287815	0.368442	0.211352	-0.144357	-0.14601	NA	0.570353	0.85942	1.15927	0.435535	1.43406	1.02545	0.792393
183	ACSBG1	-0.0547861	-0.127854	-0.0743412	0.0339819	-0.18225	-0.138983	0.199701	-0.477703	0.199737	0.00532203	0.39408	0.17666	-0.159606	-0.181413	-0.0389135	0.106877	-0.0769204	-0.287579	-0.104822	-0.150887	0.0195341	-0.168217	NA	0.350334	0.360962	0.254925	0.225593	0.441958	0.274701	0.296
184	ACSBG2	0.0166416	0.0541846	-0.159335	0.179646	-0.0338418	0.336372	0.130216	0.233374	0.439369	0.301834	-0.0414024	0.0461497	-0.0867145	0.0904898	0.149573	0.209718	-0.149474	0.0817907	0.103793	0.00457616	-0.207241	-0.111429	NA	0.773157	0.30031	0.333482	0.840794	0.172705	0.223669	0.332538
185	ACSF2	-0.336718	-0.185194	-0.0871718	-0.37466	-0.233426	-0.158008	-0.360185	-0.41482	0.0988035	-0.355371	-0.364998	-0.377464	-0.372252	-0.260438	-0.539875	-0.209446	-0.424383	-0.0424685	-0.145118	-0.225271	0.0486604	-0.223004	NA	0.288332	0.432615	0.821023	0.71735	0.361181	0.256631	0.301665
186	ACSF3	0.0619979	0.188911	0.152203	0.173778	0.154144	0.372787	0.0461326	0.540105	0.205468	0.00591817	0.0863471	0.235998	-0.121325	0.0713209	0.222906	0.124651	0.099764	0.208524	0.0964768	0.281346	0.334508	-0.0301013	NA	0.974981	0.210218	0.517126	0.828388	0.441585	0.691915	0.408569
187	ACSL1	-0.0116534	0.137897	0.261182	0.0583043	0.122419	-0.292022	0.140541	0.0384767	-0.622521	0.432563	-0.15148	0.0195542	-0.101188	0.0466733	-0.0548595	0.171468	0.111947	0.132892	0.315102	-0.0393085	-0.00916605	0.531531	NA	0.314581	0.735728	0.210419	0.476397	0.573879	0.342442	0.343155
188	ACSL3	-0.943318	-0.779491	-0.890816	-1.02053	-0.485061	-1.47755	-1.02238	-1.27006	-1.68504	-0.81719	-1.22758	-0.843354	-1.0282	-0.958406	-0.871423	-1.16964	-0.483213	-0.486909	-0.8741	-0.684881	-0.611981	-1.16965	NA	2.44421	1.45595	2.83863	2.80105	1.10322	2.23335	2.1108
189	ACSL4	-0.00227365	-0.138052	-0.11742	-0.231516	0.00374814	-0.152872	0.0562711	-0.0696291	-0.236115	0.145437	-0.0328952	0.101241	-0.0467072	-0.0613544	-0.346684	-0.116347	0.117412	-0.109916	-0.184847	-0.0912572	-0.0382317	-0.196608	NA	0.196034	0.192746	0.429457	0.659774	0.34195	0.270556	0.0903263
190	ACSL5	0.0245391	0.305894	-0.00816932	0.117934	0.011345	-0.132287	0.196892	-0.117151	-0.147423	0.110136	0.283648	-0.0910552	0.00352323	0.161149	0.134263	0.101604	-0.0164063	0.0390963	0.249522	0.362265	-0.0365389	0.0202003	NA	0.422462	0.615145	0.233587	0.708887	0.238719	1.32328	0.505322
191	ACSL6	-0.164176	0.0937655	-0.0295437	-0.172432	-0.0598472	-0.257223	0.222125	-0.331997	-0.18245	0.00687697	0.437374	-0.334874	-0.162303	0.00464887	-0.287524	-0.0573401	-0.0400149	-0.0796795	0.25574	-0.0682093	0.104934	-0.164021	NA	0.2824	0.629034	0.436519	0.33941	0.32829	0.481093	0.272052
192	ACSM1	0.097272	0.178619	-0.0606913	0.242163	0.290735	0.311311	-0.0996197	0.398734	0.223889	0.113055	-0.312294	-0.0685561	0.264746	0.0956261	0.671803	-0.187477	0.46268	0.118791	-0.0699658	0.427204	0.202876	-0.324259	NA	0.553711	0.22241	0.585027	0.404081	1.40725	0.857994	0.35126
193	ACSM2A	0.0457096	-0.00408505	-0.0741477	0.323563	0.209292	-0.188974	0.00907941	-0.339932	-0.0380152	0.269871	-0.251712	0.110715	0.085808	-0.0593939	0.360488	0.286639	0.243136	0.175449	0.262469	-0.270639	-0.0165729	-0.131722	NA	0.428412	0.234887	0.536107	1.26898	0.923642	0.603583	0.345453
194	ACSM2B	0.0159487	0.277745	0.140118	-0.0155608	-0.0357673	0.511781	-0.119828	0.589744	0.433818	-0.0514649	-0.18819	-0.0315752	-0.11687	0.196291	-0.106708	0.0755866	-0.11795	0.0464155	0.0927488	0.46274	0.134666	0.145569	NA	1.1542	0.509564	0.4698	0.434613	0.421969	0.533818	0.732009
195	ACSM3	0.0222461	0.0344727	0.288125	0.078781	0.00247337	0.29106	0.177367	0.394159	0.187961	0.411769	-0.0570338	-0.0145972	0.127156	-0.045821	-0.0705813	0.228143	-0.0218149	0.0267616	0.0788298	-0.0098845	0.15527	0.42098	NA	0.837461	0.626913	0.235824	0.399599	0.462773	0.590515	0.906267
196	ACSM4	-0.0250274	0.0247447	-0.0372414	0.127061	0.0425574	-0.228986	0.230449	-0.321264	-0.136708	0.592726	-0.131828	-0.071491	-0.0265637	0.0229724	0.210301	0.043821	0.249143	-0.164028	0.108332	-0.058843	-0.0608512	-0.0136315	NA	0.295271	0.749117	0.229885	0.602216	0.419959	0.546873	0.432727
197	ACSM5	0.0855645	0.164873	0.117308	-0.0607272	-0.0987015	0.290948	0.290922	0.0767751	0.50512	0.383736	0.198109	0.071365	0.131417	0.0539112	-0.110484	-0.0109703	-0.139733	-0.0576696	0.176969	0.152777	0.110537	0.124078	NA	0.527242	0.733016	0.627088	0.154297	0.641979	0.503202	0.482613
198	ACSM6	0.13088	0.0254161	-0.107164	-0.0509084	-0.0425943	0.38997	0.229328	0.137261	0.642678	0.567947	-0.109291	0.375322	0.0421933	-0.0248752	-0.0585961	-0.0432206	0.169511	-0.254699	0.0873421	-0.0365099	-0.260382	0.0460546	NA	0.690718	0.454671	0.910095	0.45145	0.279316	0.492403	0.458433
199	ACSS1	-0.0812505	0.0859823	-0.189999	-0.00303051	0.246957	0.560104	0.277483	0.32232	0.797887	0.292767	0.262198	-0.271102	0.0795726	-0.0522219	0.0758538	-0.0819148	0.631706	-0.137793	0.014411	0.157554	-0.462877	0.0828794	NA	1.22231	0.59369	0.226945	0.479215	0.404167	0.426403	0.410782
200	ACSS2	-0.0260742	-0.150741	0.00982036	0.0331711	-0.0393542	-0.38799	0.0184061	-0.452534	-0.323446	-0.205302	0.242115	-0.0836193	0.181552	-0.176155	0.141713	-0.0753705	0.00900811	-0.0877164	-0.336787	0.0353058	0.249041	-0.2294	NA	0.454854	0.648548	0.427128	0.383173	0.278895	0.32222	0.267184
201	ACSS3	0.266774	0.0957733	0.5534	0.198039	0.236473	0.628185	-0.00272186	0.57869	0.67768	0.185291	-0.190735	0.26078	-0.111029	0.65057	0.0633029	0.332774	0.425919	0.0470278	0.0594622	0.132084	0.778906	0.327894	NA	1.26304	0.174006	0.863279	0.607281	0.622591	0.64099	1.27904
202	ACTA1	-0.18384	-0.115852	-0.0868161	-0.137811	0.103228	-0.212733	-0.247911	-0.12699	-0.298477	-0.332351	-0.16347	-0.0725524	-0.383782	-0.0951856	-0.107648	-0.167974	-0.112655	0.319112	-0.112746	-0.118957	-0.130071	-0.0435613	NA	0.274268	0.392347	0.352617	0.199468	0.394251	0.142493	0.328272
203	ACTA2	0.0833311	0.250547	-0.332567	-0.00135984	0.119822	0.181438	-0.159268	0.331803	0.0310736	-0.0616273	-0.256909	0.130863	0.00213965	0.11699	-0.00071157	-0.00200811	0.254355	-0.0147106	0.358391	0.142702	-0.592608	-0.0725252	NA	0.363969	0.401538	0.415669	0.213913	0.356192	0.564538	0.416518
204	ACTB	-1.87802	-2.04225	-2.13076	-1.66384	-2.35584	-1.89349	-2.07976	-1.96929	-1.81769	-2.50396	-1.65556	-1.81796	-2.19808	-1.618	-1.77012	-1.55756	-2.43147	-2.28021	-1.93292	-2.15158	-2.12589	-2.13564	NA	3.3812	3.5423	5.20621	4.76615	3.52044	4.85232	4.79317
205	ACTBL2	-0.0997295	-0.243254	0.0609386	-0.0183802	0.1723	0.274202	0.249539	0.408194	0.14021	0.337213	0.161866	-0.15528	0.0991999	-0.243109	-0.0154823	-0.0212782	0.294519	0.0500813	-0.247874	-0.238635	-0.0293618	0.151239	NA	0.465365	0.742706	0.238072	0.568749	1.04159	0.391217	0.354344
206	ACTC1	0.229189	-0.00339337	0.0997587	0.0607237	-0.0176207	-0.182905	-0.267088	-0.425599	0.059788	-0.0132811	-0.520895	0.175633	0.204658	0.307276	-0.0447842	0.166232	0.155527	-0.190768	0.116684	-0.12347	0.371138	-0.171621	NA	0.603504	0.413332	1.17718	0.317192	0.19232	0.288201	0.315846
207	ACTG1	-0.102571	0.0305775	-0.263167	-0.0800745	0.00987386	-0.0705683	0.323145	-0.140683	-0.000453599	0.281358	0.364932	-0.20233	-0.0401445	-0.0652372	0.0012676	-0.161417	-0.0286215	0.0483692	0.0922871	-0.0311322	-0.433124	-0.0932098	NA	0.237809	0.619988	0.188425	0.765711	0.278602	0.220317	0.313212
208	ACTG2	0.12793	0.226363	0.106812	-0.0439814	0.134052	0.0691342	0.114301	-0.185352	0.323621	0.183128	0.0454752	0.145131	0.098471	0.140188	0.00423009	-0.0921928	0.0416335	0.22647	0.132519	0.320207	-0.10628	0.319905	NA	0.810588	0.288657	0.774691	0.393302	0.59165	1.18719	0.87309
209	ACTL10	0.0460945	0.133644	-0.297048	0.286514	0.231016	0.369389	0.272225	0.375686	0.363093	0.500917	0.0435344	-0.131998	0.119841	0.15044	0.322198	0.25083	0.317184	0.144847	0.140731	0.126557	-0.122792	-0.471303	NA	1.01468	0.775735	0.59346	1.85404	1.408	0.553696	0.344986
210	ACTL6A	-0.943102	-0.748774	-0.835256	-0.368705	-0.44614	-0.966714	-0.698526	-1.07497	-0.858453	-1.01058	-0.386469	-0.813352	-1.2301	-0.785853	-0.195055	-0.542354	-0.440971	-0.451309	-0.805974	-0.691574	-0.613599	-1.05691	essential_DepMap	2.1452	0.928759	2.25104	1.37914	0.944316	1.94982	1.30986
211	ACTL6B	0.12266	0.168381	0.0438957	0.0579535	0.281819	0.151635	0.081542	-0.00332474	0.306594	-0.0764716	0.239556	0.225397	0.183726	-0.041142	0.148298	-0.032391	0.338835	0.224804	0.00035217	0.33641	-0.175353	0.263144	NA	0.569562	0.368912	0.401209	0.518772	0.833841	0.932963	0.288881
212	ACTL7A	-0.00742717	0.049814	-0.0486765	0.113611	0.00712403	-0.105831	0.172023	0.0816369	-0.293298	0.184544	0.159501	0.0555437	-0.00169635	-0.0761289	0.0458295	0.181393	-0.229906	0.244154	0.145459	-0.0458309	-0.215941	0.118588	Nonessential_DepMap	0.221726	0.506751	0.258061	0.710355	0.254149	0.535615	0.36507
213	ACTL7B	0.207839	0.0356117	0.23764	0.0849786	0.151989	0.309837	0.052278	0.402827	0.216847	-0.0622842	0.16684	0.0791189	0.350445	0.193955	-0.0452777	0.215235	0.116696	0.187283	-0.0275836	0.0988071	0.408509	0.0667706	Nonessential_DepMap	0.835087	0.376709	1.11238	0.309064	0.669353	0.417476	1.29261
214	ACTL8	-0.0571039	0.0319323	0.0584645	-0.104044	-0.0601223	0.0684283	-0.0527737	-0.105368	0.242225	-0.0658773	-0.03967	-0.0736145	-0.0909348	-0.00676248	-0.0337871	-0.174301	0.0375683	-0.157813	0.100932	-0.0370676	0.00855303	0.108376	NA	0.331195	0.16515	0.222573	0.324071	0.209989	0.337355	0.32034
215	ACTL9	0.100166	-0.107092	-0.0150738	-0.138876	-0.0437682	-0.46075	-0.0812349	-0.389422	-0.532078	-0.106471	-0.0559991	0.0749519	0.25034	-0.0247933	-0.0256106	-0.252141	-0.482468	0.394932	0.0121378	-0.226322	-0.287644	0.257496	Nonessential_DepMap	0.485804	0.342332	0.29243	0.283888	1.10121	0.236797	0.608465
216	ACTN1	0.051783	0.0499485	0.185202	0.0244857	0.0449197	0.154032	-0.0875884	0.0532112	0.254854	-0.433515	0.258338	0.123556	-0.00427864	0.0360717	0.107439	-0.058468	-0.0113802	0.10122	0.321292	-0.221395	-0.0208515	0.391256	NA	0.450813	0.687209	0.478862	0.307889	0.447648	0.40784	0.795942
217	ACTN2	-0.0588557	-0.00217479	-0.281237	0.0611796	0.102899	-0.0254908	-0.189228	-0.428133	0.377151	-0.364827	-0.0136295	-0.0534482	-0.0437598	-0.0793591	-0.0469899	0.169349	0.0223009	0.183497	-0.0990382	0.0946886	-0.0625203	-0.499954	NA	0.397625	0.211764	0.323306	0.606188	0.637951	0.245996	0.446056
218	ACTN3	-0.0616135	-0.154321	0.0237155	0.25314	-0.196068	0.0126195	-0.439422	-0.180542	0.205781	-0.52685	-0.351994	-0.228552	-0.0050029	0.0487144	0.183984	0.322295	-0.107485	-0.284651	-0.416552	0.107909	0.368031	-0.3206	NA	0.196045	0.657597	0.401209	1.29525	0.485911	0.503873	0.453216
219	ACTN4	-0.00937838	-0.0596267	-0.0444202	-0.0960914	0.249704	-0.213537	-0.175762	-0.492942	0.065868	-0.501285	0.149761	-0.259795	-0.0937378	0.325397	-0.205407	0.0132244	0.0783987	0.421009	-0.233598	0.114345	-0.270893	0.182053	NA	0.214496	0.427808	0.659556	0.445874	0.90136	0.143304	0.276959
220	ACTR10	-1.30291	-0.938576	-1.27661	-1.32381	-0.973716	-1.24224	-1.61779	-1.13061	-1.35388	-1.31254	-1.92303	-1.55354	-1.22248	-1.1327	-1.46082	-1.18681	-0.929603	-1.01783	-1.06931	-0.807837	-1.30129	-1.25193	essential_DepMap	1.84941	2.17266	3.15864	3.40792	2.60043	2.34464	1.99895
221	ACTR1A	-0.970439	-0.526086	-0.778913	-1.26839	-0.725625	-1.12017	-0.85596	-1.10763	-1.1327	-1.05253	-0.659389	-0.901826	-0.820658	-1.18884	-1.19246	-1.34433	-0.897106	-0.554143	-0.470248	-0.581925	-0.644929	-0.912897	NA	1.80523	1.67592	2.63827	3.94	1.20748	0.932883	1.55427
222	ACTR1B	-0.328524	-0.239123	-0.517213	-0.481324	-0.464513	-0.273738	-0.547765	-0.0336378	-0.513838	-0.810357	-0.285173	-0.171521	-0.535015	-0.279036	-0.2403	-0.722348	-0.617548	-0.311478	-0.179678	-0.298568	-0.636627	-0.3978	NA	0.492468	0.51897	0.628932	0.637313	0.62273	0.430579	1.19152
223	ACTR2	-0.633238	-0.730097	-0.812611	-0.990964	-0.830111	-0.764281	-0.432875	-0.835988	-0.692574	-0.401117	-0.464633	-0.695716	-0.587476	-0.616522	-1.09628	-0.885651	-0.628188	-1.03203	-0.840387	-0.619807	-0.540288	-1.08493	NA	1.96529	0.758105	1.77469	3.19735	1.59408	1.82373	1.44117
224	ACTR3	-0.397127	-0.217598	-0.123162	-0.430534	-0.723656	-0.381306	-0.359568	-0.278104	-0.484507	-0.452185	-0.266951	-0.405673	-0.405556	-0.380151	-0.592742	-0.268325	-0.688049	-0.759263	-0.313971	-0.121225	-0.172538	-0.0737849	essential_DepMap	0.398282	0.495808	1.26201	0.910171	2.05341	0.350514	0.322626
225	ACTR3B	-0.214489	-0.359158	0.00896185	0.0206708	-0.18294	-0.135537	0.249402	-0.211793	-0.0592809	0.308472	0.190331	-0.24014	-0.314841	-0.0884869	-0.0321565	0.0734981	-0.0980667	-0.267813	-0.684719	-0.0335976	0.224494	-0.20657	NA	0.560637	0.577033	0.970616	0.417752	0.294397	0.713205	0.487122
226	ACTR3C	-0.164627	-0.098521	0.130391	0.0518333	-0.0680607	-0.127192	-0.249345	-0.179565	-0.07482	-0.70587	0.20718	-0.244327	-0.146923	-0.102632	-0.0626867	0.166353	0.00986918	-0.145991	0.301225	-0.498267	0.125116	0.135667	NA	0.218349	0.406669	0.316053	0.573725	0.446311	0.293138	0.839354
227	ACTR5	-0.260499	-0.331735	-0.240027	-0.398124	-0.218089	-0.249277	-0.322594	-0.17053	-0.328024	-0.352072	-0.293116	-0.291764	-0.272956	-0.216776	-0.57214	-0.224108	-0.233851	-0.202328	-0.517195	-0.146275	-0.211586	-0.268469	NA	0.202113	0.648025	0.542118	0.68025	0.347072	0.575045	0.297888
228	ACTR6	-0.445155	-0.751283	-0.419166	-0.586151	-0.26553	-0.784045	-0.190877	-0.707906	-0.860183	-0.546983	0.16523	-0.163587	-0.699395	-0.472484	-0.598529	-0.573773	-0.538396	0.00733687	-0.952788	-0.549778	-0.236608	-0.601724	essential_DepMap	1.05807	0.340269	1.03058	1.06569	0.358521	0.954094	0.586072
229	ACTR8	-0.580155	-0.324252	-0.621484	-0.595675	-0.528739	-0.714312	-0.283752	-0.36619	-1.06243	-0.0983932	-0.469111	-0.75308	-0.51067	-0.476714	-0.863914	-0.327436	-0.643753	-0.413725	-0.237242	-0.411263	-0.794424	-0.448544	essential_DepMap	1.70185	0.534833	1.17263	1.09406	1.02317	0.707174	0.828906
230	ACTRT1	0.00545281	-0.264878	-0.537042	0.00871883	-0.197931	0.0267018	-0.433661	0.0721082	-0.0187045	-0.386781	-0.48054	-0.146992	0.157333	0.00601788	-0.269335	0.286773	-0.771589	0.375728	-0.0567368	-0.47302	-0.21452	-0.859563	NA	0.347947	0.687579	0.534617	0.407829	0.332154	0.410615	0.830928
231	ACTRT2	-0.0257458	0.0261318	-0.0312078	-0.135533	-0.0947672	-0.268904	-0.0152334	-0.372589	-0.165219	-0.223817	0.19335	-0.0741592	0.0488926	-0.0519706	0.00509601	-0.276161	-0.139858	-0.0496768	0.148655	-0.0963918	0.172215	-0.23463	NA	0.367158	0.18928	0.191789	0.219805	0.444779	0.316831	0.292904
232	ACTRT3	0.06819	-0.264345	-0.245572	0.0605173	-0.162376	0.164159	-0.443291	-0.19533	0.523649	-0.462777	-0.423804	0.131756	-0.0133389	0.0861524	-0.161348	0.282383	-0.556239	0.231486	-0.170753	-0.357936	-0.0267624	-0.464382	NA	0.439478	0.67921	0.417937	0.365987	0.513747	0.418363	0.478672
233	ACVR1	0.102719	0.0655905	-0.280948	-0.0448325	0.175808	0.196146	-0.371504	0.179458	0.212834	-0.365395	-0.377613	0.190441	0.1452	-0.0274843	-0.0152517	-0.0744133	0.237407	0.114208	0.0419481	0.0892329	0.00684034	-0.568737	NA	0.594415	0.458078	0.514279	0.329779	1.4551	0.393194	0.357748
234	ACVR1B	0.208711	0.0917783	0.0156577	-0.214731	-0.16772	-0.107878	-0.0542218	-0.699512	0.483756	-0.205551	0.0971078	0.0890197	0.295731	0.241383	-0.169978	-0.259484	0.0266186	-0.362058	0.152048	0.031509	-0.13394	0.165256	NA	0.359862	0.476963	0.636388	0.440417	0.252852	0.361621	0.235723
235	ACVR1C	-0.0629236	0.188756	-0.0788262	0.0712031	0.0553504	-0.13318	0.218727	-0.282163	0.0158039	0.235348	0.202105	-0.0725151	-0.344614	0.228358	0.131051	0.0113551	-0.0976569	0.208358	0.432812	-0.0553	0.0916449	-0.249297	NA	0.332541	0.495855	0.716699	0.433674	0.706284	0.617344	0.506277
236	ACVR2A	0.15581	-0.152937	-0.187873	-0.00260581	-0.189731	-0.302552	-0.163294	-0.117666	-0.487439	-0.250651	-0.0759379	-0.00128677	0.312529	0.156188	0.112219	-0.117431	-0.204744	-0.174717	-0.130297	-0.175576	-0.326148	-0.0495982	NA	0.377427	0.147441	0.530178	0.352153	0.182881	0.300665	0.385155
237	ACVR2B	-0.05051	0.00867566	0.236013	0.0517798	0.0782269	0.14227	0.0566013	0.335174	-0.0506343	-0.147953	0.261156	0.0184808	-0.113172	-0.0568392	-0.0286839	0.132244	0.286856	-0.130403	0.0165233	0.000827999	0.28096	0.191067	NA	0.361536	0.615467	0.360514	0.316588	0.502096	0.453704	0.885222
238	ACVRL1	-0.0710536	-0.0730141	-0.0306562	0.0502309	0.101652	0.0819108	-0.00988127	-0.0127606	0.176582	-0.0243392	0.0045767	-0.179328	-0.0798748	0.0460422	0.178138	-0.0776757	0.201925	0.00137989	-0.0497029	-0.0963253	0.0324681	-0.0937805	NA	0.250047	0.198761	0.343902	0.266261	0.318257	0.40139	0.509922
239	ACY1	0.0457408	0.0813752	0.156372	-0.108409	-0.141527	-0.0969353	0.147892	-0.0042306	-0.18964	0.32957	-0.0337872	0.224871	-0.0531751	-0.0344731	0.123673	-0.34049	-0.288566	0.00551228	0.131778	0.0309727	-0.141945	0.454689	NA	0.162585	0.396682	0.596879	0.268137	0.510752	0.33112	0.869747
240	ACY3	-0.107303	0.00806639	0.0908602	-0.178952	0.0950187	-0.254762	-0.0736765	-0.379056	-0.130469	-0.139113	-0.00824051	-0.15678	-0.144955	-0.0201733	-0.275116	-0.0827873	0.0583789	0.131659	0.0872441	-0.0711114	0.318608	-0.136888	NA	0.27606	0.428344	0.310691	0.438565	0.370035	0.287822	0.390649
241	ACYP1	-0.0379076	0.0826783	0.0839481	0.0563118	-0.0286464	0.281443	0.164272	0.339887	0.223	0.267995	0.0605488	-0.0870009	-0.00565493	-0.0210669	-0.190705	0.303329	0.0455994	-0.102892	0.14478	0.0205763	0.272929	-0.105033	NA	0.622922	0.413053	0.2652	0.495962	0.143915	0.494477	0.674187
242	ACYP2	0.00926425	0.0509961	0.0809808	0.0474704	-0.184458	0.14638	-0.10932	0.0935277	0.199232	0.0281978	-0.246839	-0.0581067	0.0254286	0.0604709	0.0368962	0.0580446	-0.226424	-0.142491	-0.0911911	0.193183	-0.111747	0.273708	NA	0.371718	0.30329	0.278189	0.432145	0.377097	0.486756	0.371376
243	ADA	0.215949	0.00135356	-0.0932339	0.131514	-0.185608	0.193131	0.183593	0.213308	0.172953	0.221013	0.146174	0.30695	0.0801756	0.26072	0.171951	0.0910767	-0.313823	-0.0573934	-0.271095	0.273802	0.133731	-0.320199	NA	0.606442	0.64299	1.12668	0.725796	0.316867	0.47181	0.340212
244	ADA2	-0.0310867	-0.188923	0.394041	0.149795	0.0357629	-0.295763	-0.155409	-0.670238	0.078713	-0.377808	0.0669894	-0.0611539	-0.216473	0.184367	0.175164	0.124425	-0.231756	0.303282	-0.464491	0.0866446	0.399617	0.388465	NA	0.4984	0.832565	0.320572	0.96172	0.577403	0.267421	1.27717
245	ADAD1	0.0454733	0.0635793	0.0665915	-0.130013	0.0312167	0.158668	0.0101612	0.0661111	0.251225	0.202942	-0.18262	-0.137932	-0.0205165	0.294868	-0.247374	-0.0126521	0.148696	-0.0862626	0.0700518	0.0571069	0.433479	-0.300296	Nonessential_DepMap	0.496693	0.271995	0.416801	0.44841	0.796206	0.324011	0.472994
246	ADAD2	0.0757479	0.000927621	0.0285159	0.217668	-0.111546	0.582915	0.0588057	0.492416	0.673415	-0.110033	0.227645	-0.118148	0.248114	0.0972778	0.0971174	0.338218	-0.301143	0.0780499	-0.0490524	0.0509076	-0.0594203	0.116452	NA	1.8842	0.680615	0.552842	1.8635	0.584367	0.342576	0.308344
247	ADAL	-0.0604025	0.0106851	0.0839138	0.0157816	-0.0249309	-0.202952	-0.0542042	-0.0134509	-0.392453	-0.101979	-0.00642981	-0.0604118	-0.0291586	-0.0916372	-0.028107	0.0596703	-0.0611894	0.0113276	0.0550207	-0.0336505	0.0733274	0.0945003	NA	0.395169	0.23517	0.157391	0.538007	0.269266	0.492016	0.403425
248	ADAM10	0.0754106	0.321559	0.16289	0.0182187	0.0775084	0.327422	-0.0760378	0.700408	-0.0455648	-0.607679	0.455603	-0.0715103	0.0356929	0.262049	0.141772	-0.105335	0.0576213	0.0973955	0.206569	0.436549	0.199691	0.126089	NA	0.867997	1.13966	0.326058	0.247375	0.726144	1.16526	0.497539
249	ADAM11	-0.285069	-0.31047	-0.279398	-0.351152	-0.262283	-0.271923	-0.261276	-0.419327	-0.124519	-0.27687	-0.245681	-0.229839	-0.391316	-0.234051	-0.109418	-0.592886	-0.276416	-0.248151	-0.145489	-0.475451	0.382991	-0.941787	NA	0.242748	0.638754	0.563837	0.464604	0.360036	0.452348	0.463354
250	ADAM12	0.0121004	0.0149494	-0.503017	-0.143673	0.113804	-0.418641	-0.325603	-0.330174	-0.507109	0.0639706	-0.715176	-0.00688855	-0.286189	0.329379	-0.0208239	-0.266523	0.382576	-0.154968	-0.134641	0.164539	-0.477758	-0.528275	NA	0.394549	0.470927	0.50307	0.272296	0.509178	0.611966	0.617938
251	ADAM15	-0.119017	-0.224982	0.360199	0.198856	0.00778521	-0.0725045	0.112993	-0.144502	-0.000506469	0.0548107	0.171175	-0.046021	-0.186582	-0.12445	0.197822	0.199891	-0.048491	0.0640614	-0.341893	-0.108071	0.234895	0.485502	NA	0.326481	0.348722	0.278189	1.21627	0.436661	0.306929	1.06062
252	ADAM17	0.134717	0.215479	0.0245051	0.288319	-0.116492	0.557423	0.130796	0.555402	0.559444	0.0914816	0.170111	0.13785	0.291643	-0.0253405	0.26467	0.311969	-0.211724	-0.0212595	0.251397	0.179562	0.0500285	-0.00101818	NA	1.60037	0.408852	0.488117	1.41836	0.409019	0.813547	0.296962
253	ADAM18	0.0372128	-0.0172906	0.0750388	-0.0307762	0.0303074	0.0945392	0.34034	0.150597	0.0384814	0.185081	0.495598	0.0136804	-0.243701	0.341659	0.0495006	-0.111053	-0.0509858	0.111601	0.0533491	-0.0879302	-0.074437	0.224515	Nonessential_DepMap	0.459439	0.536103	0.510042	0.429983	0.411986	0.397848	0.414218
254	ADAM19	-0.102115	-0.0549913	0.266792	-0.110983	-0.176884	0.420196	0.0413263	-0.108594	0.948987	-0.258184	0.340837	-0.113292	-0.274083	0.0810295	-0.19002	-0.0319459	-0.29312	-0.0606485	-0.0312984	-0.0786842	0.27329	0.260293	NA	0.470848	0.381769	0.308919	0.197945	0.311465	0.163331	0.922659
255	ADAM2	0.00816672	-0.0219204	0.0501193	-0.143571	-0.254199	0.0135756	-0.0410197	-0.000455797	0.0276071	-0.139727	0.0576879	-0.210811	0.20827	0.0270412	-0.22033	-0.0668119	-0.309873	-0.198525	0.0577206	-0.101561	-0.0532225	0.153461	Nonessential_DepMap	0.281087	0.38425	0.249492	0.313864	0.415997	0.232258	0.192959
256	ADAM20	0.0832332	0.207376	-0.0910666	0.177309	0.114493	0.0406391	-0.00893746	0.154346	-0.0730683	-0.188165	0.17029	-0.00810931	0.207329	0.0504802	0.210391	0.144226	0.127542	0.101445	0.193811	0.220941	-0.16857	-0.0135632	Nonessential_DepMap	0.317048	0.366597	0.406714	1.0894	0.790034	1.34816	0.245338
257	ADAM21	0.0201086	-0.0147091	0.0587026	-0.0097749	0.198782	-0.22017	-0.0824344	-0.0938001	-0.346541	0.111226	-0.276094	0.126349	-0.027506	-0.0385177	-0.054822	0.0352722	0.172065	0.2255	0.0554824	-0.0849006	-0.0629077	0.180313	NA	0.353915	0.201401	0.455932	0.363728	0.728937	0.420434	0.45342
258	ADAM22	-0.260494	-0.395896	-0.270282	-0.356838	-0.0959548	-0.436731	0.312694	-0.78151	-0.0919521	0.283078	0.34231	-0.301278	-0.189822	-0.290383	-0.361172	-0.352504	0.010664	-0.202574	-0.119788	-0.672004	-0.0117419	-0.528822	NA	0.397181	0.659338	0.482804	0.792958	0.217062	0.684752	0.619744
259	ADAM23	-0.0673434	0.0395961	-0.0577834	0.0700213	-0.0740996	-0.327235	0.0682532	-0.21787	-0.4366	0.261139	-0.124633	0.0084	-0.133876	-0.0765546	0.0244765	0.115566	-0.155344	0.00714524	-0.00141043	0.0806026	-0.0878942	-0.0276725	NA	0.40616	0.565695	0.366532	0.369262	0.297802	0.498961	0.230331
260	ADAM28	0.208429	0.215038	-0.243619	0.323635	0.261556	0.0719062	0.09848	0.123352	0.02046	0.143772	0.0531881	-0.0394971	0.280576	0.384206	0.35811	0.28916	0.238438	0.284674	0.0271339	0.402943	-0.0324493	-0.454788	NA	0.742811	0.553129	0.832683	1.54033	1.0133	0.494946	0.288248
261	ADAM29	0.133574	0.0886475	0.00681213	0.0885446	0.237333	-0.0969004	0.48907	-0.114266	-0.0795345	0.477748	0.500392	0.363121	-0.0662033	0.103804	0.14617	0.0309187	0.187043	0.287623	0.107017	0.0702776	-0.130812	0.144437	NA	0.202417	1.10799	0.486782	0.329884	0.794696	0.719324	0.309003
262	ADAM30	-0.164925	-0.105022	0.25339	-0.184808	-0.144945	0.172042	-0.446128	0.0132307	0.330854	-0.401451	-0.490805	-0.188369	-0.211861	-0.0945451	-0.412585	0.0429685	-0.0202534	-0.269637	-0.148895	-0.0611492	0.29426	0.21252	Nonessential_DepMap	0.284498	0.468745	0.294136	0.36994	0.382963	0.342113	0.595928
263	ADAM32	-0.141214	0.284688	-0.0134607	-0.0319715	0.17069	-0.106591	0.340197	-0.074953	-0.138229	0.391916	0.288478	-0.28383	-0.0964771	-0.0433356	0.0362347	-0.100178	0.255895	0.0854857	0.383179	0.186197	0.190527	-0.217448	NA	0.607892	0.680946	0.16813	0.150157	0.766098	1.14246	0.296829
264	ADAM33	-0.0120706	-0.0648668	-0.496069	-0.319113	-0.127109	-0.222155	-0.353791	-0.498366	0.0540564	-0.322903	-0.384679	-0.201403	-0.206063	0.371255	-0.0327489	-0.605478	-0.120591	-0.133627	0.24876	-0.378493	-0.619239	-0.3729	NA	0.376002	0.389409	0.383	0.385957	0.168031	0.500533	0.620247
265	ADAM7	0.171525	0.143299	0.0304202	0.148992	0.0690385	0.295276	0.465084	0.213892	0.376659	0.68975	0.240418	0.154592	0.148659	0.211324	-0.01122	0.309204	0.117072	0.0210046	0.0253013	0.261296	0.119957	-0.0591162	NA	0.795466	1.01038	1.21681	0.782757	0.1938	0.433382	0.294885
266	ADAM8	0.181018	0.391596	-0.0190671	0.24785	0.18116	0.599739	-0.00795131	0.601967	0.59751	0.0248521	-0.0407547	0.378663	0.114354	0.0500371	0.202083	0.293617	0.0942168	0.268102	0.565069	0.218123	-0.251369	0.213235	NA	1.5882	0.794113	0.61261	1.09871	0.484862	1.35939	0.370621
267	ADAM9	-0.0390446	0.0894392	0.0694221	0.000860443	-0.112316	0.00108096	0.110089	0.301096	-0.298934	0.184622	0.0355555	0.0906799	-0.17097	-0.0368438	0.0512408	-0.0495199	-0.0600004	-0.164632	0.135121	0.0437574	0.154519	-0.0156744	NA	0.360894	0.228413	0.171985	0.231728	0.451617	0.420108	0.302797
268	ADAMDEC1	0.0231585	0.0499722	-0.0205541	0.176505	-0.0826807	-0.0117961	0.0763966	0.0194456	-0.0430379	0.291522	-0.138729	-0.352162	0.272956	0.148681	0.127606	0.225403	0.0770947	-0.242456	0.325902	-0.225957	0.01072	-0.0518283	NA	0.389531	0.283321	0.655608	0.607827	0.354465	0.370682	0.192394
269	ADAMTS1	0.192145	0.0150948	0.180982	0.117177	0.197736	0.102305	0.429233	0.151996	0.0526145	0.338925	0.519542	0.448148	0.0370446	0.0912417	0.214681	0.0196725	0.0472967	0.348176	0.20154	-0.171351	0.205419	0.156545	NA	0.354205	1.04575	0.573489	1.02132	0.525452	0.229623	0.630626
270	ADAMTS10	-0.303346	-0.575911	-0.28582	-0.195305	-0.663053	-0.140499	-0.838727	0.24429	-0.525289	-0.105995	-1.57146	-0.343548	-0.340803	-0.225686	-0.233638	-0.156972	-0.751718	-0.574389	-0.876478	-0.275344	-0.0483795	-0.523261	NA	0.803244	0.742796	0.414539	0.328554	1.5683	0.615886	0.699263
271	ADAMTS12	-0.00980525	0.121554	0.0932595	-0.0203006	-0.0112397	0.0189227	-0.407232	0.12732	-0.0894744	-0.611624	-0.20284	-0.0672953	-0.0533084	0.091188	-0.14953	0.108929	-0.125211	0.102732	0.12586	0.117248	0.0215236	0.164995	NA	0.407834	0.488377	0.154902	0.204534	0.481302	0.434873	0.704542
272	ADAMTS13	0.259213	0.075248	0.147312	0.0624042	0.294192	0.176431	0.289241	0.210957	0.141904	0.480511	0.0979704	0.0859395	0.244132	0.447568	0.0281178	0.0966906	0.354641	0.233744	0.0148936	0.135602	0.140723	0.1539	NA	0.533036	0.835186	0.939302	0.387396	1.06696	0.473448	0.346088
273	ADAMTS14	-0.169963	-0.27457	-0.0469022	-0.0887221	-0.351953	-0.193826	-0.316925	-0.38081	-0.00684244	-0.602208	-0.031643	-0.177461	-0.0653882	-0.267038	-0.0716725	-0.105772	-0.129935	-0.573972	-0.219147	-0.329993	-0.0811013	-0.012703	NA	0.310141	0.326122	0.21467	0.331428	0.411819	0.567945	0.323295
274	ADAMTS15	0.169076	0.310016	0.351859	0.229308	0.0885746	0.15884	0.248056	-0.0554461	0.373126	0.085637	0.410476	0.159592	0.14406	0.203576	0.22492	0.233696	0.0868604	0.0902888	0.366329	0.253703	0.366329	0.33739	NA	0.4069	0.356761	1.00966	1.23182	0.366956	1.51646	1.57473
275	ADAMTS16	0.222208	0.109432	0.393713	0.220352	0.236803	-0.00757215	-0.17646	0.198825	-0.21397	-0.354609	0.00168922	0.0387691	0.388957	0.238899	0.140682	0.300022	0.270893	0.202713	0.078564	0.1403	0.522315	0.265112	NA	0.229645	0.759139	0.767004	0.846156	0.667208	0.504587	0.968569
276	ADAMTS17	0.00781268	-0.266138	-0.0734388	-0.0419339	0.149502	-0.213086	-0.0713982	-0.207312	-0.21886	0.209938	-0.352735	-0.0270595	0.0463878	0.00410972	-0.0279789	-0.0558889	0.198514	0.100491	-0.313726	-0.218549	-0.160769	0.0138912	NA	0.185946	0.383137	0.378824	0.191485	0.627714	0.634362	0.384073
277	ADAMTS18	0.0595894	0.350158	0.236955	0.124156	0.297322	0.170388	0.0502312	0.0531195	0.287657	0.247738	-0.147275	-0.0111949	0.0770347	0.112928	0.116635	0.131677	0.248493	0.346151	0.367239	0.333078	0.276036	0.197874	NA	1.10104	0.448324	0.66354	0.699481	1.0363	1.86049	0.908534
278	ADAMTS19	0.104554	0.215367	0.153611	-0.0398823	0.260056	-0.0795836	0.498917	-0.254919	0.0957515	0.466433	0.531402	0.0992872	0.183441	0.0309354	0.0656748	-0.145439	0.371274	0.148838	0.204653	0.226082	0.217909	0.0893132	NA	0.23616	1.3344	0.754487	0.386401	1.08715	1.24597	0.557246
279	ADAMTS2	-0.0654488	-0.0950491	0.176368	-0.00929418	-0.0640791	0.0757415	-0.0293504	0.0843774	0.0671056	0.0636749	-0.122376	-0.0204983	-0.032216	-0.143632	-0.111358	0.0927694	0.154943	-0.283101	-0.00408231	-0.186016	0.165599	0.187137	NA	0.569039	0.290883	0.437707	0.278717	0.207279	0.256926	0.554513
280	ADAMTS20	0.0560196	0.171627	-0.24803	-0.0577791	-0.43561	0.122382	-0.0502327	0.410487	-0.165724	-0.220151	0.119686	0.0804257	-0.0108666	0.0984997	-0.232732	0.117174	-0.378689	-0.492532	0.188489	0.154765	0.0843189	-0.580379	NA	0.578166	0.493793	0.376751	0.35924	0.812665	0.665506	0.410324
281	ADAMTS3	-0.0930571	-0.0893576	0.0388179	-0.273669	-0.524067	-0.0396544	-0.527874	0.151916	-0.231224	0.0126827	-1.06843	-0.0949202	-0.422573	0.238322	-0.357018	-0.19032	-0.827351	-0.220782	-0.278195	0.0994792	-0.0534022	0.131038	NA	0.206748	0.589359	0.375718	0.465384	0.603067	0.339647	0.348678
282	ADAMTS4	0.0145448	-0.424589	-0.22171	-0.291469	-0.108694	-0.131146	-0.199166	-0.166908	-0.0953838	-0.215855	-0.182476	0.00320759	0.002247	0.0381799	-0.222112	-0.360827	-0.209016	-0.00837247	-0.434234	-0.414945	-0.352982	-0.0904379	NA	0.267357	0.271042	0.289037	0.746178	0.281432	0.846902	0.378211
283	ADAMTS5	0.00833955	0.115216	-0.0291898	-0.138541	-0.0886566	-0.122502	0.144781	-0.326012	0.081008	0.189291	0.100271	-0.00664253	0.0703487	-0.0386875	-0.147188	-0.129894	0.0180286	-0.195342	0.229637	0.000795823	0.159725	-0.218104	NA	0.471919	0.344554	0.226945	0.465644	0.269674	0.429457	0.216304
284	ADAMTS6	-0.0855622	-0.0182361	0.22678	0.0034957	-0.0666077	-0.0668663	0.0165821	1.43332e-05	-0.133747	0.162045	-0.128881	-0.0483492	-0.101387	-0.10695	0.0800195	-0.0730281	0.0559695	-0.189185	0.140556	-0.177028	0.370746	0.0828144	NA	0.192472	0.363793	0.233587	0.785991	0.404223	0.268407	0.801676
285	ADAMTS7	-0.0536999	-0.285466	-0.0568791	-0.0836419	-0.00502493	0.00737795	-0.276593	-0.0935642	0.10832	-0.268566	-0.28462	-0.0159619	-0.00230465	-0.142833	-0.113046	-0.0542384	-0.129036	0.118986	-0.145762	-0.42517	0.242978	-0.356736	NA	0.231173	0.444797	0.372634	0.297845	0.418836	0.457056	0.333585
286	ADAMTS8	0.188362	0.186736	0.395737	0.071476	-0.0586122	0.181813	0.287523	0.0281338	0.335492	0.154154	0.420891	0.144291	0.265071	0.155724	0.0722303	0.0707216	-0.226863	0.109639	0.304652	0.068819	0.419302	0.372172	NA	0.477471	0.401298	1.03905	0.679501	0.283458	0.578929	1.80392
287	ADAMTS9	0.0489769	-0.0688708	-0.0832945	0.0785842	0.119749	0.188375	-0.199867	0.108113	0.268636	-0.196773	-0.202962	-0.176308	0.257477	0.0657616	0.0607761	0.0963923	0.0482654	0.191232	-0.209306	0.0715647	-0.067771	-0.098818	NA	0.582495	0.5781	0.441291	0.589535	0.547164	0.400597	0.215169
288	ADAMTSL1	0.188735	0.14662	0.145851	0.331978	0.311858	0.156739	0.169856	-0.0147202	0.328199	0.0499466	0.289765	0.188148	0.182062	0.195996	0.357723	0.306233	0.231326	0.392391	0.254817	0.0384233	-0.00550882	0.29721	NA	0.517823	0.498455	0.882729	1.75732	1.01798	0.783991	0.378168
289	ADAMTSL2	0.0224139	0.063086	0.062837	0.102694	0.0571202	0.0485459	0.429808	-0.236286	0.333377	0.578196	0.281419	-0.188029	0.161753	0.0935178	0.0994476	0.10594	-0.059521	0.173761	0.140766	-0.0145937	-0.346842	0.472516	NA	0.413846	0.842651	0.363512	0.466476	0.483842	0.596065	0.317599
290	ADAMTSL3	0.0200315	-0.16754	0.0486641	-0.0196325	0.0220509	-0.131985	0.207704	-0.0988721	-0.165097	-0.0606164	0.476025	-0.317406	0.131411	0.24609	0.160688	-0.199953	0.0963239	-0.052222	-0.510739	0.175658	0.0718758	0.0254524	NA	0.382392	0.469391	0.31158	0.847592	0.277321	0.359976	0.365145
291	ADAMTSL4	-0.142901	-0.133371	-0.142298	-0.278046	-0.216012	-0.278338	-0.0391646	-0.250642	-0.306035	-0.0475883	-0.0307409	-0.233873	-0.201657	0.0068276	-0.262881	-0.29321	-0.0226027	-0.409422	-0.0768294	-0.189913	-0.0694618	-0.215134	NA	0.359002	0.325244	0.551294	0.894251	0.343686	0.260273	0.174749
292	ADAMTSL5	-0.0604827	0.0659889	0.0238393	-0.0906656	0.0332	-0.239905	-0.161608	0.0799398	-0.55975	-0.310708	-0.0125081	-0.282536	0.00570397	0.0953844	0.0192976	-0.200629	-0.0215768	0.0879768	0.187866	-0.0558885	0.270157	-0.222478	NA	0.356552	0.169536	0.151811	0.26301	0.201128	0.405469	0.266353
293	ADAP1	-0.123141	0.0161113	-0.211927	0.0786589	-0.27425	0.159404	-0.123012	-0.0651927	0.384	0.475312	-0.721336	-0.0443435	-0.0614654	-0.263614	0.0783031	0.0790147	-0.124201	-0.424298	0.118264	-0.0860418	-0.0497355	-0.374119	NA	0.795419	0.420731	0.173925	0.537258	0.3677	0.309622	0.587844
294	ADAP2	0.00548454	-0.233557	0.0769638	-0.158467	0.0687983	-0.538545	-0.454225	-1.09954	0.022445	-0.316918	-0.591533	-0.0929134	-0.0023126	0.11168	-0.336631	0.0196969	0.0860449	0.0515518	-0.23036	-0.236754	0.168257	-0.0143291	NA	0.33461	0.466311	0.393619	0.305658	0.172308	0.379994	0.357135
295	ADAR	-0.207205	-0.104507	-0.175349	0.01533	0.055041	-0.2068	0.0684908	-0.14765	-0.26595	0.0694962	0.0674854	-0.109055	-0.533929	0.0213677	-0.149113	0.179773	0.149176	-0.0390942	-0.270389	0.0613756	-0.097856	-0.252842	NA	0.243661	0.301126	0.255707	0.411913	0.450439	0.208994	0.203301
296	ADARB1	-0.100497	-0.021624	0.23525	0.0264063	0.125281	0.0795155	0.0804756	0.0251411	0.13389	-0.110549	0.2715	-0.130291	0.0408482	-0.212049	-0.0974905	0.150303	0.125389	0.125172	0.115404	-0.158652	0.22417	0.246331	NA	0.427447	0.447239	0.303644	0.478693	0.541491	0.737492	0.880992
297	ADARB2	0.0875542	0.00325313	-0.000968515	-0.0171488	0.164299	0.0360463	-0.0605126	0.0259666	0.0461259	0.0688113	-0.189837	0.0720317	0.15789	0.0327415	0.0168661	-0.0511638	0.0716261	0.256972	0.00793345	-0.00142719	0.155537	-0.157474	NA	0.276614	0.433568	0.434152	0.237614	0.797679	0.395882	0.363031
298	ADAT1	-0.0341475	0.251517	0.252574	-0.0718857	0.139199	0.180462	-0.134774	0.0649645	0.29596	-0.2031	-0.0664481	0.157338	-0.202916	-0.0568654	-0.15428	0.0105088	0.074851	0.203546	0.420809	0.0822257	0.427667	0.0774809	NA	0.756825	0.455386	0.283997	0.36814	0.912538	0.9337	0.45095
299	ADAT2	-0.867938	-0.759542	-0.758726	-0.442126	-1.2702	-0.459765	-0.602324	-0.488711	-0.43082	-1.17277	-0.0318781	-0.903626	-0.935956	-0.764233	-0.383794	-0.500457	-1.05963	-1.48077	-1.12667	-0.392415	-1.1083	-0.409155	essential_DepMap	1.08657	0.700804	2.37263	1.25467	1.94275	1.50914	2.4233
300	ADAT3	-0.77535	-0.735731	-0.951952	-0.619302	-0.550572	-0.588066	-0.805502	-0.856628	-0.319505	-0.76634	-0.844664	-0.808351	-0.926348	-0.591351	-0.769991	-0.468612	-0.433652	-0.667493	-0.732281	-0.73918	-1.04835	-0.855552	NA	0.782159	2.32925	3.40894	1.49732	0.983296	2.30146	1.80107
301	ADCK1	0.148621	0.0818643	0.42333	0.0804023	0.265947	0.332235	0.134765	0.419901	0.244568	0.0431136	0.226416	-0.278909	0.323164	0.401609	0.0382728	0.122532	0.121258	0.410637	-0.0841827	0.247911	0.330253	0.516408	NA	0.547018	0.63989	0.596879	0.30405	0.806063	0.581177	1.62233
302	ADCK2	0.103305	-0.0105534	0.203111	0.0566001	-0.179933	-0.152187	-0.102423	-0.207368	-0.0970059	-0.145237	-0.0596093	0.121182	0.114745	0.0739864	-0.0594186	0.172619	-0.132973	-0.226893	-0.154092	0.132985	0.214212	0.19201	NA	0.382774	0.163182	0.705534	0.407701	0.226854	0.383708	0.832284
303	ADCK5	0.0620803	0.0397233	0.00147936	0.0368437	0.0155495	0.297879	0.142442	0.311393	0.284365	0.0377593	0.247125	0.17962	0.16773	-0.161109	-0.0722196	0.145907	-0.0328167	0.0639156	-0.00426626	0.083713	-0.0649555	0.0679143	NA	0.848367	0.370407	0.614394	0.473008	0.32691	0.520461	0.330558
304	ADCY1	-0.0590174	-0.0452391	-0.0538854	-0.0524022	0.0254339	-0.105832	-0.35259	-0.352247	0.140583	-0.40065	-0.304531	0.114995	-0.25596	-0.0360878	0.00220682	-0.107011	0.0647831	-0.0139154	-0.0793502	-0.0111279	-0.00513809	-0.102633	NA	0.666522	0.429994	0.365523	0.120245	0.245847	0.116265	0.247356
305	ADCY10	-0.0365304	-0.173081	-0.0837103	-0.127953	-0.0359185	-0.00367313	-0.390997	0.0698722	-0.0772184	-0.522842	-0.259152	-0.128104	-0.0268778	0.0453909	-0.198601	-0.0573041	-0.0318186	-0.0400184	-0.151336	-0.194825	-0.237443	0.0700227	NA	0.330158	0.472428	0.245652	0.371243	0.221223	0.292464	0.269363
306	ADCY2	0.0220894	-0.102101	-0.155176	0.0804193	0.14163	-0.0623761	-0.0325097	-0.353279	0.228527	0.139165	-0.204184	0.00992012	0.0404771	0.0158709	0.189157	-0.0283181	0.157601	0.12566	0.0499847	-0.254186	-0.494269	0.183917	NA	0.544173	0.188103	0.383	0.472628	0.580209	0.253401	0.309769
307	ADCY3	-0.0540501	-0.135251	-0.09742	0.16207	0.322495	-0.273812	0.287116	0.136539	-0.684163	0.452533	0.121698	-0.169707	0.088114	-0.0805569	0.18772	0.136421	0.412837	0.232152	-0.234004	-0.0364992	-0.360058	0.165218	NA	0.465162	0.399591	0.372634	0.687051	0.874067	0.358893	0.37083
308	ADCY4	0.0530565	-0.0173378	-0.481596	-0.505876	-0.173531	-0.161295	0.0861992	-0.289238	-0.0333519	0.226686	-0.0542877	0.153231	0.190379	-0.184441	-0.480595	-0.531157	-0.513351	0.166288	0.049698	-0.0843736	0.062717	-1.02591	NA	0.501581	0.355639	0.341989	0.958154	0.503991	0.293133	0.46978
309	ADCY5	-0.110746	-0.0600049	-0.00404357	0.0261356	-0.114431	-0.071821	-0.683223	-0.0955431	-0.0480989	-0.56412	-0.802326	-0.394725	-0.0305952	0.0930814	0.0831423	-0.0308712	-0.0616054	-0.167257	0.0642184	-0.184228	0.342779	-0.350866	NA	0.303207	0.862978	0.436519	0.389249	0.312542	0.559129	0.315024
310	ADCY6	-0.253347	-0.487052	-0.208495	-0.35576	-0.126126	-0.241747	-0.338441	-0.0651216	-0.418372	-0.375435	-0.301447	-0.339268	-0.382907	-0.0378671	-0.0856924	-0.625827	-0.0866621	-0.16559	-0.639234	-0.33487	-0.482557	0.0655673	NA	0.365316	0.295592	0.536107	0.410125	0.314164	0.589243	0.52385
311	ADCY7	-0.12189	0.0498692	-0.0929344	-0.0780143	-0.0230236	-0.265819	-0.0490058	-0.411885	-0.119753	0.0470282	-0.14504	-0.104864	-0.130642	-0.130164	-0.19496	0.0389316	0.274429	-0.320476	0.0931894	0.00654891	-0.106508	-0.0793606	NA	0.325189	0.288281	0.200659	0.552214	0.419092	0.583535	0.238764
312	ADCY8	0.0230218	0.161281	0.118581	-0.0118555	0.107008	0.248857	0.0209543	0.572017	-0.0743023	0.0543126	-0.0124039	0.165993	0.131908	-0.228835	0.0549	-0.078611	0.0815988	0.132417	-0.0184951	0.341058	0.177128	0.0600333	NA	0.697576	0.22295	0.519993	0.463783	0.572546	0.541135	0.248482
313	ADCY9	-0.0604137	0.0655184	0.00667817	0.0449164	-0.0524271	-0.02924	-0.03863	-0.0675743	0.00909421	-0.245257	0.167997	-0.209884	-0.032929	0.061572	-0.0121795	0.102012	-0.0569473	-0.0479068	-0.201626	0.332663	0.109633	-0.0962771	NA	0.29243	0.188304	0.151195	0.246398	0.380536	0.379143	0.431487
314	ADCYAP1	-0.0151566	0.186018	-0.0414272	-0.118032	0.0395632	0.403434	0.255743	-0.0103159	0.817185	0.433801	0.0776854	-0.00403765	-0.0465892	0.00515713	-0.292411	0.0563458	0.0269664	0.05216	-0.0551185	0.427154	-0.381978	0.299124	NA	0.464939	0.882629	0.386158	0.463802	0.325626	0.43374	0.390854
315	ADCYAP1R1	0.00405964	0.0147705	-0.112277	0.0155231	-0.303039	-0.0993662	0.14909	-0.453394	0.254661	0.505096	-0.206916	0.016654	0.0751727	-0.0796478	-0.389152	0.420198	-0.481682	-0.124396	-0.0796768	0.109218	-0.247871	0.0233169	NA	0.564681	0.654522	0.352617	0.425564	0.331982	0.272463	0.362235
316	ADD1	0.0121787	0.0913892	-0.0232314	-0.0138675	-0.0639109	0.0262184	-0.130438	0.00181688	0.0506199	-0.204042	-0.0568354	-0.0274215	-0.00253591	0.0664934	-0.0835815	0.0558465	-0.137858	0.0100363	0.142367	0.0404111	0.12757	-0.174032	NA	0.159957	0.387084	0.365523	0.329759	0.213462	0.514364	0.220696
317	ADD2	0.131163	0.142107	-0.0398651	0.160789	0.00751631	0.0586409	0.164108	0.176569	-0.0592869	0.194405	0.133811	0.193341	0.099392	0.100756	0.206541	0.115036	0.121307	-0.106275	0.0235178	0.260696	0.158456	-0.238186	NA	0.205627	0.37956	0.546682	0.771872	0.552237	0.596216	0.158428
318	ADD3	-0.0454455	-0.0375323	-0.0102185	0.00765205	-0.254729	-0.395867	0.173352	-0.0614179	-0.730316	0.104984	0.241719	-0.113124	0.154735	-0.177948	0.135402	-0.120097	-0.124222	-0.385236	0.00341504	-0.0784797	0.114223	-0.13466	NA	0.502048	0.443004	0.387216	0.259077	0.439561	0.28223	0.430258
319	ADGB	0.124113	0.0991718	-1.80993e-05	-0.00675816	-0.228618	-0.30594	-0.194726	-0.606691	-0.00518905	-0.216478	-0.172973	-0.0217957	0.00988851	0.384247	-0.00610556	-0.00741076	0.0171345	-0.47437	0.141122	0.0572213	-0.159991	0.159955	NA	0.525398	0.304006	0.514279	0.211008	0.400646	0.481249	0.326161
320	ADGRA1	0.120526	0.281587	-0.116583	0.234699	0.0922608	0.324875	-0.00276111	0.150757	0.498992	-0.121362	0.11584	0.0912599	0.180916	0.0894021	0.12176	0.347637	0.00461997	0.179902	0.179165	0.384009	-0.250007	0.0168397	NA	0.671722	0.156113	0.443697	0.695404	0.694519	0.803741	0.181078
321	ADGRA2	-0.222587	-0.220762	-0.0914149	0.0441679	-0.0113287	-0.54139	-0.0978562	-0.324142	-0.758637	-0.178811	-0.0169015	-0.0304604	-0.447011	-0.190289	-0.149769	0.238105	-0.0244622	0.0018048	-0.195681	-0.245842	-0.228191	0.0453608	NA	0.534714	0.447058	0.393619	0.240362	0.283266	0.248825	0.304961
322	ADGRA3	0.0713446	0.187092	0.161909	0.148004	0.173875	0.299461	0.344106	0.478117	0.120805	0.227916	0.460297	-0.00722124	-0.0931043	0.314359	0.0517652	0.244242	0.198125	0.149625	0.258216	0.115968	0.162205	0.161613	NA	0.66155	0.930917	0.372634	0.721149	0.59187	0.799389	0.558195
323	ADGRB1	0.0108573	0.121448	0.202802	-0.12091	-0.0246249	0.0150056	0.116553	0.0385226	-0.00851144	-0.189675	0.422782	0.0688581	-0.0470663	0.0107802	-0.0710867	-0.170733	0.118169	-0.167419	0.144662	0.0982351	0.149192	0.256412	NA	0.288518	0.360044	0.413413	0.248567	0.236763	0.692354	0.747693
324	ADGRB2	-0.306382	-0.300692	-0.10984	-0.0986837	-0.0975854	-0.255661	-0.290106	-0.445528	-0.0657939	-0.00813695	-0.572074	-0.138785	-0.371782	-0.408579	-0.240062	0.0426945	-0.251159	0.0559883	-0.0420244	-0.559359	-0.32842	0.108739	NA	0.254176	0.39194	0.636388	0.321077	0.147981	0.541804	0.234071
325	ADGRB3	0.0587116	-0.197698	-0.0652171	-0.236833	0.0135434	0.00296275	-0.321419	0.0800889	-0.0741634	-0.559357	-0.0834812	0.209109	-0.184388	0.151414	-0.0887276	-0.384939	0.0667577	-0.039671	-0.202144	-0.193252	-0.0463885	-0.0840458	NA	0.263376	0.581094	0.429457	0.328517	1.01915	0.326376	0.206412
326	ADGRD1	0.0937699	0.0155237	0.320172	0.134466	-0.388759	0.299349	0.100705	0.30543	0.293268	0.276743	-0.0753327	0.203462	0.0458378	0.0320096	0.36718	-0.0982476	-0.385904	-0.391614	0.193525	-0.162477	-0.131898	0.772242	NA	0.604726	0.2162	0.338187	0.6498	0.612228	0.279452	0.493731
327	ADGRE1	-0.0806657	-0.211422	-0.265611	-0.0157772	-0.270547	-0.104631	-0.62516	0.0105716	-0.219833	-0.899217	-0.351103	-0.0856528	-0.164039	0.0076944	0.0789885	-0.110543	-0.200931	-0.340163	-0.264807	-0.158037	-0.459639	-0.0715821	NA	0.229376	0.649713	0.203426	0.460893	0.603539	0.449191	0.431605
328	ADGRE2	-0.271362	-0.324765	0.052068	-0.273722	-0.0371227	-0.435559	0.153777	-0.686658	-0.18446	0.133943	0.173611	-0.211231	-0.493475	-0.109379	-0.279478	-0.267966	-0.0174507	-0.0567948	-0.40052	-0.24901	0.130885	-0.0267495	NA	0.531643	0.58321	0.537602	0.720584	1.26651	0.524067	0.210451
329	ADGRE3	-0.0987056	-0.0628432	-0.301326	-0.0427706	-0.24856	0.0803301	0.00513234	-0.0535197	0.21418	0.0403586	-0.030094	-0.213078	-0.201305	0.118266	-0.194519	0.108978	-0.313997	-0.183124	-0.0890886	-0.0365978	-0.372287	-0.230365	NA	0.209648	0.607488	0.262807	0.232191	0.321159	0.369054	0.430749
330	ADGRE5	-0.306687	-0.48147	-1.32809	-0.0966667	-0.392527	-0.614467	-0.781412	-0.629555	-0.599379	-0.922642	-0.640182	-0.393565	-0.182944	-0.343552	-0.134173	-0.0591607	-0.322723	-0.462331	-0.115633	-0.847306	-1.463	-1.19318	NA	0.723481	1.10398	0.440093	0.457007	0.867732	0.426683	1.92204
331	ADGRF1	0.0156715	-0.170463	-0.162421	0.00688841	0.0548285	-0.0468919	0.0721912	0.114202	-0.207986	0.201526	-0.057143	0.148898	0.204486	-0.306369	-0.00486061	0.0186374	0.0668033	0.0428538	-0.116477	-0.224448	-0.0984565	-0.226386	NA	0.12787	0.427349	0.576754	0.190632	0.295198	0.247875	0.167102
332	ADGRF2	0.0766001	-0.0763533	0.186527	-0.0250998	-0.0911865	0.0284187	0.180073	0.0237307	0.0331067	0.116191	0.243955	0.17408	-0.0026691	0.0583895	0.0462944	-0.096494	-0.0861128	-0.0962603	-0.0500211	-0.102685	0.0035716	0.369483	NA	0.598436	0.615889	0.559091	0.36832	0.204788	0.256126	0.414302
333	ADGRF3	0.0914041	0.0726932	0.186351	0.119771	0.280178	0.344	-0.206219	0.249496	0.438504	-0.365675	-0.0467625	-0.0143651	0.36939	-0.080812	0.127136	0.112406	0.445955	0.1144	-0.0169507	0.162337	0.105623	0.267079	NA	1.03251	0.230645	0.314258	0.75738	0.437574	0.632476	0.476559
334	ADGRF4	0.0436398	0.0266166	-0.210276	-0.0262837	-0.209136	0.261775	0.107949	0.257798	0.265752	0.327088	-0.111189	0.272768	0.138766	-0.280614	-0.0385422	-0.0140251	-0.0795459	-0.338726	-0.021027	0.0742603	-0.301346	-0.119207	NA	0.691811	0.335132	0.508638	0.155775	0.73783	0.19071	0.468011
335	ADGRF5	-0.0105041	0.277702	0.0526727	-0.0780907	-0.193916	0.0804147	0.306303	-0.0109466	0.171776	0.21039	0.402217	-0.0668669	0.0458113	-0.0104566	-0.057946	-0.0982354	-0.116778	-0.271054	0.37743	0.177975	-0.0939272	0.199273	NA	0.360907	1.16485	0.258848	0.39247	0.312685	1.58236	0.38926
336	ADGRG1	0.125747	0.388913	0.520783	0.0980654	0.230302	-0.368596	0.0462583	-0.918868	0.181677	0.0628266	0.02969	0.209409	0.0913211	0.0765109	-0.0536402	0.249771	0.306384	0.15422	0.330294	0.447532	0.672593	0.368974	NA	0.441417	0.219035	0.607303	0.331311	1.36705	1.79108	1.58102
337	ADGRG2	0.132147	-0.267794	-0.0305369	0.0972142	0.150607	0.17924	0.381151	0.139073	0.219407	0.410173	0.352129	0.348754	0.234484	-0.186797	-0.0342263	0.228655	0.034716	0.266499	-0.305969	-0.229618	0.0555425	-0.116616	NA	0.511308	1.12607	0.571865	0.565616	0.679171	0.395018	0.148265
338	ADGRG3	-0.105608	-0.0350092	0.182295	-0.185586	-0.0810736	-0.0561215	-0.116611	-0.00721535	-0.105028	0.208156	-0.441379	0.0467164	-0.303802	-0.0597397	-0.0290379	-0.342134	0.0268919	-0.189039	-0.0880205	0.0180022	0.155887	0.208704	NA	0.132105	0.33059	0.219683	0.368876	0.20292	0.376084	0.611056
339	ADGRG4	0.14023	0.399796	0.0550251	0.0794021	0.0623967	0.331274	0.21635	0.207678	0.45487	0.174131	0.258568	0.18136	0.1167	0.12263	-0.137516	0.29632	0.0850306	0.0397628	0.457061	0.34253	0.144389	-0.0343383	NA	1.23944	0.429989	0.413413	0.323768	0.413779	1.21926	0.449093
340	ADGRG5	0.00993936	-0.176458	0.139729	-0.212592	-0.256121	0.138414	-0.168214	0.0975296	0.179298	-0.586752	0.250323	0.0747319	0.0136072	-0.0585211	-0.19344	-0.231743	-0.36966	-0.142583	-0.201528	-0.151387	0.100663	0.178795	NA	0.479464	0.388585	0.428291	0.453704	0.346879	0.262255	0.803741
341	ADGRG6	0.0141619	-0.224213	0.0589071	-0.0628709	0.0723517	-0.333628	-0.0599498	-0.153562	-0.513694	0.552608	-0.672507	-0.320333	0.159665	0.203153	-0.114596	-0.0111463	0.00898742	0.135716	-0.269409	-0.179016	0.00580123	0.112013	NA	0.326947	0.807943	1.05502	0.218528	0.352651	0.491814	0.33885
342	ADGRG7	0.0427081	0.133518	-0.0599998	-0.0844886	0.127667	0.0818462	0.13664	-0.0297002	0.193392	0.0306049	0.242675	-0.0157272	0.0136006	0.130251	-0.0447515	-0.124226	0.0034774	0.251856	-0.0666994	0.333736	-0.165312	0.045312	NA	0.391752	0.316615	0.358526	0.180124	0.509143	0.836359	0.244106
343	ADGRL1	0.0135893	-0.0895995	-0.220833	0.0736857	0.0129204	-0.178807	-0.163978	-0.0287851	-0.328829	-0.0416186	-0.286338	0.0846194	-0.139276	0.0954247	0.0436543	0.103717	-0.0724379	0.0982786	-0.209614	0.030415	-0.188396	-0.25327	NA	0.313493	0.592686	0.301899	0.41202	0.890116	0.365357	0.572222
344	ADGRL2	-0.20376	-0.35563	-0.234562	0.0421818	-0.678314	-0.0867084	-0.0805207	0.058096	-0.231513	0.173112	-0.334153	-0.319286	-0.125447	-0.166547	-0.0209854	0.105349	-1.16387	-0.192755	-0.408431	-0.302829	-0.753017	0.283893	NA	0.170551	0.801537	0.37366	0.468694	0.558936	0.742669	0.348213
345	ADGRL3	0.239966	0.242886	0.124973	0.192067	-0.136893	0.167154	0.302755	0.236069	0.0982388	0.0782981	0.527212	0.163939	0.248651	0.307309	0.10943	0.274705	-0.208081	-0.0657061	0.303079	0.182694	-0.054528	0.304473	NA	0.64475	0.82283	0.950782	0.850442	0.340721	0.947152	0.401691
346	ADGRL4	0.0623056	0.19401	0.164721	-0.0637528	0.149782	0.279018	0.25743	0.0812012	0.476835	0.494247	0.0206128	0.104114	0.0926663	-0.00986374	-0.0879737	-0.039532	0.239514	0.0600498	0.147166	0.240854	0.101665	0.227778	NA	0.812326	0.520531	0.543634	0.413756	0.392859	1.01517	0.789481
347	ADGRV1	-0.306105	-0.140261	0.274837	-0.110786	-0.102127	-0.156718	-0.214512	-0.427307	0.113871	-0.1347	-0.294324	-0.198596	-0.307287	-0.412433	-0.181408	-0.040164	-0.0531928	-0.15106	-0.184392	-0.0961294	0.540016	0.00965798	NA	0.39435	0.423503	0.525784	0.205296	0.371305	0.401702	0.872804
348	ADH1A	-0.00854495	-0.244551	-0.130939	-0.114937	-0.136412	0.318905	-0.276938	0.488276	0.149535	-0.221326	-0.33255	0.0508167	-0.237883	0.161431	-0.236743	0.00686764	0.374131	-0.646956	-0.334304	-0.154798	-0.00921514	-0.252663	NA	0.525428	0.274754	0.467246	0.352245	0.317927	0.271472	0.34605
349	ADH1B	0.00865908	-0.137864	-0.108924	0.0300399	0.301793	-0.0740139	-0.198962	0.118559	-0.266587	-0.0591276	-0.338797	0.00222151	0.0460896	-0.0223339	0.0437318	0.016348	0.150625	0.45296	0.100792	-0.37652	-0.172157	-0.0456914	NA	0.24891	0.285565	0.208309	0.56982	0.657245	0.271431	0.260495
350	ADH1C	0.135616	0.0153553	0.0438806	0.287907	0.100374	-0.192661	0.281369	-0.385512	0.00018925	-0.130147	0.692884	0.191668	0.277681	-0.0625019	0.351495	0.224319	0.1654	0.0353471	0.16191	-0.131199	-0.00651138	0.0942727	NA	0.246061	0.477623	0.527244	1.07656	0.435452	0.378424	0.464554
351	ADH4	-0.254876	-0.134376	-0.41904	-0.128335	0.0124589	-0.288431	-0.235847	-0.561363	-0.0154999	-0.783087	0.311394	-0.00482838	-0.445878	-0.313923	-0.151283	-0.105387	-0.0370566	0.0619744	-0.132731	-0.136021	-0.533839	-0.304242	NA	0.409844	0.788563	0.474955	0.134177	0.412194	0.361311	0.562194
352	ADH5	-0.117493	-0.160105	-0.205683	-0.0418182	0.0229669	-0.0651864	0.186213	-0.176174	0.0458015	0.420788	-0.0483634	-0.127617	0.0374091	-0.262271	-0.102743	0.0191063	-0.0900112	0.135945	-0.406633	0.0864229	-0.144953	-0.266414	NA	0.408563	0.685792	0.49485	0.118787	0.388431	0.379656	0.420171
353	ADH6	-0.12309	-0.0158771	3.26046e-05	-0.0957113	0.0558003	-0.153018	-0.282502	-0.212596	-0.0934396	-0.0795542	-0.48545	-0.00571379	-0.271333	-0.0922234	-0.121771	-0.0696518	0.0717586	0.039842	-0.00993316	-0.0218211	-0.0325094	0.0325746	NA	0.204433	0.291826	0.276544	0.426374	0.244453	0.209965	0.195254
354	ADH7	0.0397467	0.0340693	0.0442215	0.00685773	-0.0902253	0.333382	0.197724	0.686935	-0.0201704	0.634393	-0.238946	0.165352	-0.0905498	0.0444375	0.00843336	0.00528209	0.091853	-0.272304	-0.00918195	0.0773206	-0.235391	0.323834	Nonessential_DepMap	0.466006	0.760757	0.379864	0.251002	0.20937	0.256059	0.697734
355	ADHFE1	-0.150694	-0.0273447	0.122869	-0.265952	-0.0785558	-0.0167523	0.110706	-0.103927	0.070422	0.182139	0.0392718	0.110295	-0.168213	-0.394163	-0.416715	-0.11519	0.312009	-0.469121	-0.0434156	-0.0112738	0.012605	0.233133	NA	0.239766	0.225191	0.471083	0.373588	0.389267	0.219481	0.774328
356	ADI1	0.109735	-0.0217669	0.0758659	-0.215913	0.168017	0.0552381	0.219521	0.145712	-0.0352359	0.350482	0.088561	-0.110331	0.121557	0.317978	-0.348317	-0.0835095	0.0203966	0.315637	-0.0316908	-0.011843	-0.170888	0.32262	NA	0.395655	0.619671	0.500313	0.419029	0.387	0.48461	0.829514
357	ADIG	0.119669	-0.162118	-0.0511572	0.160329	-0.0199615	0.262003	-0.33851	0.235989	0.288017	-0.635532	-0.0414879	0.381456	-0.0974028	0.0749533	-0.0863581	0.407016	0.237813	-0.277736	-0.0974413	-0.226794	-0.255228	0.152914	NA	0.816039	0.323924	0.59176	0.5901	0.522676	0.2308	0.542716
358	ADIPOQ	0.121688	0.110508	-0.236361	0.246659	0.127757	0.105392	-0.278824	0.0384308	0.172353	0.114292	-0.671939	0.232044	0.0716143	0.0614041	0.144645	0.348672	0.0243749	0.23114	0.0092561	0.21176	0.166889	-0.639611	NA	0.161759	0.497561	0.614394	1.20883	0.531512	0.372721	0.452656
359	ADIPOR1	-0.00383129	0.121231	-0.377899	0.031729	0.024591	-0.223249	-0.203377	-0.31873	-0.127768	-0.218283	-0.188471	-0.163294	0.0299147	0.121885	-0.0604133	0.123871	-0.0793939	0.128576	0.237625	0.00483714	-0.281963	-0.473834	NA	0.163863	0.247168	0.213959	0.481394	0.288534	0.460359	0.561054
360	ADIPOR2	0.010527	0.29491	0.0774943	0.113685	0.268475	0.404542	0.520764	0.43037	0.378713	0.67789	0.363638	-0.200463	0.261499	-0.0294549	0.108596	0.118775	0.255763	0.281187	0.202121	0.387699	0.0425041	0.112485	NA	1.10419	1.26264	0.297569	0.855163	0.94445	1.10839	0.586549
361	ADIRF	-0.167354	-0.445971	0.0182481	-0.0992106	-0.158477	-0.434695	-0.308773	-0.0730221	-0.796367	-0.400977	-0.216569	-0.359996	0.0100939	-0.152159	-0.160973	-0.0374484	-0.293198	-0.0237552	-0.136431	-0.755512	0.171682	-0.135186	NA	0.377268	0.503873	0.253366	0.254792	0.48807	0.367842	0.695994
362	ADK	-0.102131	-0.163011	-0.136927	-0.0636874	-0.206853	-0.00338266	-0.333304	-0.103923	0.0971573	0.0906411	-0.757249	-0.0554751	-0.190955	-0.0599619	-0.0652446	-0.0621302	-0.104844	-0.308862	0.171401	-0.497423	-0.11238	-0.161474	NA	0.240208	0.432212	0.183096	0.180848	0.339372	0.403257	0.20949
363	ADM	-0.0380481	0.117218	-0.198334	-0.102142	0.100984	-0.238406	0.0086098	-0.347626	-0.129187	0.275739	-0.258519	0.196735	-0.357217	0.0463376	0.13567	-0.339954	-0.13352	0.335487	0.1223	0.112135	-0.211361	-0.185306	NA	0.262652	0.668729	0.367543	0.344982	0.739837	0.504213	0.161009
364	ADM2	0.0173152	0.0291004	-0.0185382	0.0562746	0.114357	0.0777753	0.144053	-0.00710527	0.162656	0.102253	0.185853	0.118355	0.12216	-0.18857	0.0548761	0.0576732	0.129918	0.0987952	0.141864	-0.0836629	-0.0488103	0.0117339	NA	0.480284	0.489006	0.36251	0.313332	0.694058	0.336162	0.209518
365	ADM5	-0.31961	-0.260266	-0.330327	-0.508327	-0.563027	-0.7708	-0.408897	-0.710039	-0.831561	-0.533434	-0.284361	-0.278389	-0.607574	-0.0728658	-0.782566	-0.234087	-0.796013	-0.33004	-0.0876463	-0.432885	-0.269901	-0.390754	NA	0.877473	0.595851	0.600326	0.662559	0.767557	0.396288	0.435329
366	ADNP	-0.400848	-0.197979	-0.35687	-0.410722	-0.220775	-0.588134	0.166156	-0.661925	-0.514342	0.0622351	0.270077	-0.438449	-0.388739	-0.375357	-0.185157	-0.636287	-0.228804	-0.212746	-0.06076	-0.335199	-0.454501	-0.259238	NA	0.675008	0.359941	1.27737	0.630444	0.370998	0.268964	0.528224
367	ADNP2	0.0478514	0.20184	-0.283562	0.24041	0.266521	0.0193747	-0.0152829	-0.0650287	0.103778	-0.0200114	-0.0105544	0.0725518	0.0667175	0.00428496	0.316232	0.164588	0.134319	0.398723	0.303708	0.0999726	-0.112657	-0.454468	NA	0.369415	0.165061	0.266001	0.755649	1.42916	1.11862	0.328415
368	ADO	-0.0588487	-0.373644	-0.285837	-0.334974	-0.529615	-1.13286	0.10119	-0.647741	-1.61799	0.319399	-0.117018	0.0231945	-0.348059	0.148319	-0.496269	-0.17368	-0.653937	-0.405294	-0.450251	-0.297038	-0.372287	-0.199388	NA	0.906187	0.287898	0.630784	0.456708	0.890659	0.709042	0.341126
369	ADORA1	-0.119159	0.0625207	-0.313127	0.0795291	0.255044	0.393482	0.355704	0.377647	0.409318	0.40808	0.303329	0.0262547	-0.31341	-0.0703225	0.0413062	0.117752	0.3083	0.201788	0.175409	-0.0503678	-0.387868	-0.238386	NA	0.758827	0.653061	0.310691	0.217714	0.80153	0.540261	0.597043
370	ADORA2A	-0.118571	-0.215379	0.0888734	0.04079	-0.175361	-0.261756	0.465896	-0.255446	-0.268065	0.43689	0.494901	0.162019	-0.0882584	-0.429473	-0.0303937	0.111974	-0.0946556	-0.256066	-0.0168129	-0.413944	-0.102037	0.279784	NA	0.268673	0.959912	0.284833	0.236381	0.334203	0.328008	0.495342
371	ADORA2B	0.15527	0.25243	0.488988	0.116793	0.283808	0.0645226	-0.198582	0.0676591	0.0613861	-0.256301	-0.140864	-0.0106162	0.332633	0.143793	0.102713	0.130874	0.273315	0.294301	0.273681	0.23118	0.328556	0.64942	NA	0.178283	0.336813	0.467246	0.824738	1.42503	0.946069	1.09013
372	ADORA3	-0.0376647	0.0113776	-0.0236122	-0.169122	-0.181383	0.232989	-0.133849	0.29628	0.169697	-0.284551	0.0168534	-0.00747459	-0.095012	-0.0105076	-0.115275	-0.222969	-0.0539369	-0.308829	0.10259	-0.0798347	0.0360658	-0.0832903	NA	0.412519	0.256471	0.254145	0.183229	0.25372	0.183361	0.336031
373	ADPGK	-0.0654562	0.0437834	-0.295517	-0.0144962	-0.244656	0.151066	0.00162904	0.30574	-0.00360777	0.0591377	-0.0558796	0.0899131	-0.0880166	-0.198265	0.017915	-0.0469074	-0.176627	-0.312686	-0.0524901	0.140057	-0.145548	-0.445487	NA	0.408802	0.213206	0.35164	0.496155	0.400019	0.184841	0.383446
374	ADPRH	0.0246411	-0.161413	-0.0445165	-0.168834	0.228598	-0.304852	0.172941	-0.357235	-0.252469	0.0754887	0.270393	-0.0541354	-0.0350713	0.16313	-0.255771	-0.0818965	0.505734	-0.0485366	-0.162101	-0.160725	0.177316	-0.266349	NA	0.194615	0.503077	0.329754	0.249064	0.357463	0.161271	0.25573
375	ADPRHL1	-0.0523022	0.000578557	0.00486714	-0.385997	0.0527813	-0.130744	-0.0270359	-0.246709	-0.0147789	0.120432	-0.174504	0.00607915	-0.322859	0.159874	-0.4855	-0.286494	0.140147	-0.0345848	0.0782003	-0.0770432	0.343782	-0.334048	NA	0.76025	0.300327	0.543634	0.833397	0.651199	0.55332	0.448556
376	ADPRHL2	-0.181583	-0.0262306	0.106448	-0.159204	-0.0706699	0.34208	-0.0617649	0.417195	0.266966	-0.0653761	-0.0581537	-0.084298	-0.0789292	-0.381521	-0.320838	0.00242885	-0.0522403	-0.0890995	-0.180706	0.128245	0.181112	0.0317832	NA	0.614635	0.372061	0.258061	0.470461	0.233104	0.224269	0.326302
377	ADPRM	0.197233	-0.13573	0.108337	0.149127	0.0634256	0.0906759	0.201529	0.194525	-0.0131736	0.163812	0.239247	0.408605	0.166954	0.0161388	0.0618905	0.236363	0.252476	-0.125624	-0.283993	0.0125322	0.1959	0.0207748	NA	0.382224	0.37952	0.512862	0.767786	0.325835	0.395634	0.471276
378	ADRA1A	0.192188	0.175906	0.197795	0.172968	0.0660631	0.198035	0.0760601	0.12318	0.272889	0.27819	-0.12607	0.218443	0.187953	0.170166	0.0478856	0.29805	0.110105	0.022021	0.112452	0.23936	0.17294	0.22265	NA	0.669718	0.298924	0.879426	0.794354	0.309543	0.647933	0.824517
379	ADRA1B	0.0937907	0.156749	-0.124172	0.212855	0.190075	0.455178	-0.0277131	0.431058	0.479298	0.050219	-0.105645	-0.0371383	0.0376278	0.280883	0.396698	0.0290129	0.402405	-0.0222551	0.248676	0.064822	-0.0292056	-0.219139	NA	0.987106	0.450892	0.38405	1.10904	0.862121	0.694993	0.252988
380	ADRA1D	-0.06708	0.0661868	-0.391435	0.0522394	0.0716464	0.0365836	-0.670155	-0.0384572	0.111624	-0.858204	-0.482107	-0.107859	0.0244214	-0.117803	0.0839051	0.0205737	-0.25568	0.398973	0.110067	0.0223066	-0.436059	-0.346812	NA	0.19698	0.850335	0.348722	0.316552	1.85317	0.266871	0.460265
381	ADRA2A	0.0552656	0.0492932	-0.0290238	0.0140342	-0.0191032	0.025541	-0.0774404	0.436723	-0.38564	-0.16376	0.00887882	-0.139205	0.19674	0.108262	0.00595419	0.0221142	-0.0734911	0.0352847	0.284145	-0.185558	-0.0626322	0.00458467	NA	0.682604	0.170992	0.403403	0.230704	0.241338	0.60378	0.274048
382	ADRA2B	-0.248558	-0.503374	-0.488333	-0.302509	-0.321745	-0.207881	-0.413846	-0.406106	-0.00965656	-0.196998	-0.630694	-0.143112	-0.223808	-0.378754	-0.278793	-0.326224	-0.120256	-0.523234	-0.605961	-0.400788	-0.567409	-0.409258	NA	0.540811	0.66882	0.655608	0.747159	0.431008	1.34811	0.788678
383	ADRA2C	0.134346	-0.0150231	-0.0909057	-0.0916449	0.121884	-0.364427	-0.385467	-0.0173552	-0.711499	-0.333962	-0.436973	0.198422	-0.103903	0.308518	-0.21117	0.0278803	-0.0781263	0.321894	-0.086195	0.0561487	-0.16339	-0.0184214	NA	0.315842	0.579681	0.609065	0.206122	0.363805	0.219935	0.212355
384	ADRB1	0.0706262	0.0543805	-0.511752	0.179546	-0.166234	-0.0627212	-0.644638	-0.140262	0.0148198	-0.645019	-0.644258	0.00232018	0.217971	-0.00841214	0.0111748	0.347917	-0.0476586	-0.284809	-0.0126981	0.121459	-1.31523	0.291725	NA	0.393651	0.736897	0.315155	0.491997	0.250913	0.405696	0.453485
385	ADRB2	-0.104502	-0.177916	-0.105224	-0.208931	0.0910555	-0.208408	-0.0503063	-0.181013	-0.235802	-0.117903	0.0172904	-0.0517074	-0.234563	-0.0272345	-0.237905	-0.179957	0.0575509	0.12456	-0.168829	-0.187003	-0.100329	-0.110118	NA	0.321755	0.109381	0.264401	0.501731	0.510365	0.410352	0.373983
386	ADRB3	-0.352067	-0.325998	-0.516952	-0.0990122	-0.18728	-0.431771	-0.0509559	-0.462269	-0.401273	-0.0437717	-0.05814	-0.270682	-0.492759	-0.29276	0.0163774	-0.214402	-0.104078	-0.270483	-0.578025	-0.07397	-0.652657	-0.381247	NA	0.439663	0.290951	0.703335	0.163271	0.482237	0.521854	0.791023
387	ADRM1	-0.465545	-0.832746	-0.612654	-0.534228	-0.452102	-0.818868	-0.565952	-0.684755	-0.952982	-0.624753	-0.507151	-0.435862	-0.475815	-0.484959	-0.610347	-0.458109	-0.47067	-0.433533	-0.749256	-0.916235	-0.719912	-0.505396	NA	1.58968	1.06767	1.39903	1.41178	1.23524	2.52828	1.12889
388	ADSL	-1.73894	-1.79301	-2.09127	-2.01171	-3.143	-1.88727	-2.69167	-2.06343	-1.71111	-3.81289	-1.57045	-2.18666	-1.16132	-1.86884	-2.39766	-1.62575	-3.15969	-3.12631	-1.8222	-1.76383	-2.10182	-2.08073	essential_DepMap	2.25588	2.39675	2.77211	4.00678	4.86806	3.72718	4.27205
389	ADSS	-1.04625	-0.7961	-0.819102	-0.868679	-1.10331	-0.856446	-0.518158	-1.15568	-0.557215	-0.0889336	-0.947383	-1.09491	-0.847759	-1.19609	-1.11302	-0.624335	-1.04928	-1.15734	-0.800309	-0.791892	-0.487794	-1.15041	NA	0.915029	0.611868	2.12784	1.39061	1.62921	1.21394	0.934981
390	ADSSL1	0.00702488	0.000162037	0.0318285	-0.00909846	-0.0611288	-0.259213	-0.120793	-0.113223	-0.405202	-0.298318	0.0567319	-0.029671	0.0393639	0.0113818	-0.143511	0.125314	-0.0997268	-0.0225309	0.00976669	-0.00944262	-0.0596517	0.123309	NA	0.270997	0.296184	0.330683	0.310518	0.366198	0.466692	0.394189
391	ADTRP	-0.16336	0.29305	0.143076	0.100164	0.0463265	-0.053208	0.207075	0.00659271	-0.113009	0.0664843	0.347666	-0.247174	-0.0539677	-0.188939	-0.0303484	0.230676	-0.0179645	0.110617	0.445786	0.140314	0.125314	0.160838	NA	0.493143	0.375161	0.402305	0.376053	0.222551	0.889326	0.421177
392	AEBP1	-0.182593	-0.00814632	-0.0355052	0.0843441	0.0782764	0.0746474	0.0681756	0.18346	-0.0341653	0.269272	-0.132921	-0.0963996	-0.212285	-0.239094	-0.0517647	0.220453	0.0425319	0.114021	-0.157715	0.141423	0.0882195	-0.15923	NA	0.267944	0.490347	0.298432	0.658833	0.233364	0.51878	0.212256
393	AEBP2	0.0129656	0.0124765	0.214085	0.171235	-0.313598	-0.532566	-0.202289	-0.461512	-0.60362	0.249341	-0.653919	-0.0333133	-0.0460492	0.118259	0.0950137	0.247457	0.17589	-0.803087	0.0978477	-0.0728946	0.0194715	0.408698	NA	0.509241	0.477725	0.443697	0.648233	0.550072	0.454872	0.805074
394	AEN	0.157912	0.0836188	-0.0917519	0.116092	0.0694281	0.0920403	0.344809	0.32787	-0.14379	0.164715	0.524904	0.200302	-0.0382805	0.311714	0.287036	-0.054853	0.00741845	0.131438	-0.122717	0.289955	-0.0140514	-0.169452	NA	0.316804	0.902096	1.17849	0.675623	0.266602	0.41119	0.373347
395	AES	-0.529719	-0.47813	-0.700194	-0.107585	0.012859	-0.731572	-1.06815	-0.788906	-0.674238	-1.08491	-1.0514	-0.731545	-0.0938471	-0.763763	0.0168661	-0.232035	0.0196059	0.00611215	-0.181615	-0.774646	-0.552532	-0.847855	NA	1.02504	1.3736	0.528708	0.260364	0.728046	0.700691	0.941519
396	AFAP1	-0.0801091	0.155634	-0.310864	-0.221077	0.0345769	-0.164461	0.0248811	-0.36439	0.0354679	-0.069981	0.119743	0.103181	-0.194156	-0.149353	-0.258495	-0.183659	0.399632	-0.330478	0.202757	0.10851	-0.323621	-0.298106	NA	0.231162	0.403606	0.333482	0.490616	0.407898	0.54872	0.58373
397	AFAP1L1	0.292619	0.0920069	-0.0813649	0.153121	-0.10086	0.241863	0.450205	0.347662	0.136065	0.200265	0.700144	0.202975	0.464915	0.209968	0.169901	0.136341	-0.2948	0.0930798	0.200057	-0.0160437	0.00665758	-0.169387	NA	0.543414	0.912245	0.906578	0.650713	0.489301	0.716047	0.301738
398	AFAP1L2	0.0350242	-0.0691559	-0.0747404	0.113573	0.0999268	-0.345131	0.145744	-0.561982	-0.12828	0.0272483	0.26424	-0.054956	0.0726812	0.0873475	-0.0306571	0.257802	-0.0745765	0.27443	-0.0928649	-0.045447	-0.218745	0.0692639	NA	0.324891	0.318551	0.28567	0.421786	0.39762	0.19884	0.162156
399	AFDN	0.016296	-0.0683866	0.0452311	0.130373	0.192662	0.0714482	-0.521669	0.310005	-0.167109	-0.333028	-0.71031	-0.24426	-0.00582921	0.298977	0.276011	-0.0152648	0.0739485	0.311376	-0.183119	0.0463458	-0.0156048	0.106067	NA	0.566382	0.550853	0.262807	0.433061	0.418151	0.143676	0.221983
400	AFF1	-0.028233	0.239722	0.0215926	-0.155909	0.231347	0.206022	0.137395	0.183758	0.228287	0.30739	-0.0326005	-0.0957209	-0.0397939	0.0508159	-0.194948	-0.11687	0.184145	0.27855	0.0241263	0.455318	0.0375435	0.00564161	NA	0.490307	0.740131	0.201349	0.205686	0.871601	0.855715	0.582935
401	AFF2	-0.0345588	-0.285392	0.0269544	-0.0554474	-0.0318557	-0.367417	0.0771786	-0.221345	-0.513489	0.20702	-0.0526628	-0.137565	0.0957343	-0.0618459	-0.0917854	-0.0191093	-0.00746398	-0.0562474	-0.00505523	-0.56573	0.0498614	0.00404753	NA	0.47163	0.253681	0.207608	0.20346	0.40893	0.584116	0.19003
402	AFF3	-0.496293	-0.557473	-0.873392	-0.823559	-0.442215	-0.504262	-0.930915	-0.167303	-0.841222	-0.963111	-0.898719	-0.266075	-0.450112	-0.772693	-0.991388	-0.655729	-0.881748	-0.00268126	-0.528917	-0.586029	-0.710252	-1.03653	NA	0.557298	1.2826	0.809668	1.54687	0.398137	1.04468	1.49598
403	AFF4	0.165802	-0.117626	-0.122574	-0.0405602	0.0425221	-0.13988	0.0664008	-0.292369	0.0126077	0.284821	-0.15202	0.247086	0.071568	0.178754	-0.133356	0.0522358	-0.0132803	0.0983244	-0.1217	-0.113551	-0.113085	-0.132064	NA	0.221548	0.553214	0.617983	0.280188	0.424985	0.320895	0.464497
404	AFG1L	0.00787545	0.148457	0.240963	-0.00132344	0.0684351	0.171311	-0.114234	0.0848361	0.257786	-0.432371	0.203902	0.118482	-0.0739667	-0.020889	-0.0297417	0.0270949	0.00259149	0.134279	0.0529504	0.243964	0.163333	0.318593	NA	0.439669	0.225753	0.432974	0.83751	0.611828	0.563768	1.38081
405	AFG3L2	-1.12779	-1.20482	-0.930022	-1.17807	-1.83059	-1.19689	-0.837921	-0.943647	-1.45013	-0.524819	-1.15102	-1.33053	-0.7261	-1.32674	-1.30993	-1.04621	-1.95059	-1.71059	-1.2425	-1.16714	-1.63333	-0.226711	essential_DepMap	1.82333	1.38924	2.27409	2.35804	2.67001	3.84958	1.14266
406	AFM	-0.0773499	0.124322	-0.269258	0.062148	-0.12932	0.39154	-0.00579273	0.237491	0.54559	0.381892	-0.393477	0.033222	-0.0440845	-0.221187	-0.114667	0.238963	-0.167449	-0.0911907	0.0188804	0.229764	-0.333344	-0.205172	Nonessential_DepMap	0.69867	0.371836	0.275724	0.556749	0.398146	0.777554	0.345525
407	AFMID	0.0441702	-0.128485	-0.251448	-0.0186171	-0.415296	-0.247927	-0.0172767	-0.147932	-0.347923	0.161695	-0.196248	0.0889797	0.101486	-0.0579551	-0.151765	0.114531	-0.290988	-0.539605	-0.0973966	-0.159574	-0.472323	-0.030574	NA	0.444217	0.316039	0.486782	0.451494	0.568814	0.230863	0.56813
408	AFP	0.0731015	-0.0533863	0.397216	-0.107065	0.226461	0.257986	0.126733	-0.182964	0.698936	0.356887	-0.10342	0.152631	0.0709716	-0.00429839	-0.470172	0.256042	0.205498	0.247424	-0.312083	0.20531	0.422065	0.372367	NA	0.321423	0.409125	0.363512	0.28813	0.789937	0.774271	1.14117
409	AFTPH	0.160682	-0.171873	0.211043	-0.0673462	0.111597	0.172941	-0.0875675	0.0752041	0.270679	0.246189	-0.421324	0.0993205	0.0183782	0.364346	-0.0740856	-0.0606068	-0.0263628	0.249557	-0.203263	-0.140483	0.355504	0.0665809	NA	0.537984	0.240944	0.490797	0.455064	0.278985	0.536361	0.639402
410	AGA	-0.0194706	0.0864068	0.0651601	0.0521082	0.0120721	0.106981	0.329647	-0.0461192	0.260081	0.649686	0.00960842	-0.24724	0.134817	0.0540119	0.166796	-0.0625802	-0.0392507	0.0633949	0.122986	0.0498279	0.0683303	0.06199	NA	0.436335	0.805463	0.518557	0.385746	0.480723	0.27856	0.573787
411	AGAP1	0.179331	-0.0050895	0.136983	0.135334	0.286781	0.31421	0.406827	0.436998	0.191422	0.585247	0.228407	0.141644	0.109875	0.286475	0.304194	-0.0335253	0.348626	0.224937	0.0416124	-0.0517914	0.238357	0.0356099	NA	0.777089	0.655777	0.987163	0.757103	1.15908	0.369903	1.0266
412	AGAP11	-0.226301	-0.37361	-0.271939	-0.215014	-0.666026	-0.317789	-0.751397	-0.371683	-0.263896	-0.579133	-0.923662	-0.145552	0.0735824	-0.606934	-0.047081	-0.382948	-0.833354	-0.498698	-0.768834	0.0216131	-0.797662	0.253784	NA	0.457031	1.44154	0.657577	0.596691	1.37837	0.72268	0.85422
413	AGAP2	-0.319715	-0.136396	-0.301019	-0.299316	-0.185664	-0.280206	-0.39639	-0.219326	-0.341086	-0.0429284	-0.749852	-0.53353	-0.158115	-0.267501	-0.393437	-0.205196	-0.239543	-0.131786	-0.377061	0.10427	-0.536711	-0.0653277	NA	0.211316	0.373751	0.568636	0.489157	0.373429	0.426255	0.39072
414	AGAP3	0.143455	0.0266875	0.0122528	0.210118	-0.161737	0.114295	-0.33978	0.101153	0.127437	0.10005	-0.779611	0.243952	0.0800166	0.106396	0.30361	0.116626	-0.25645	-0.0670245	0.117656	-0.064281	0.202782	-0.178277	NA	0.424137	0.397837	0.505845	0.649437	0.296988	0.363397	0.235484
415	AGAP4	-1.25362	-1.43585	-1.04676	-1.07924	-0.663559	-1.15688	-1.98987	-1.29803	-1.01573	-1.68493	-2.2948	-0.890091	-1.71296	-1.15782	-1.08918	-1.06929	-0.454338	-0.872779	-1.06855	-1.80315	-1.1861	-0.907423	NA	1.20989	2.29936	2.70553	2.01117	0.922369	2.62379	2.52978
416	AGAP5	-0.775819	-0.707992	-1.10359	-1.1951	-0.730708	-0.630035	-0.451896	-0.30716	-0.95291	-0.511768	-0.392025	-0.754747	-0.777123	-0.795588	-1.3877	-1.0025	-0.777302	-0.684114	-0.952368	-0.463617	-1.62926	-0.577913	NA	0.916329	0.72356	1.99568	1.82305	1.43229	1.29743	1.31057
417	AGAP6	-0.848934	-0.51523	-0.631092	-0.684747	-0.133063	-0.530286	-0.0403352	-0.321929	-0.738643	-0.0334097	-0.0472607	-0.908893	-0.951594	-0.686316	-0.648607	-0.720886	-0.235006	-0.0311194	-0.60494	-0.425521	-0.697041	-0.565143	NA	1.31431	0.380234	1.95861	1.82026	0.384871	1.19597	1.14263
418	AGAP9	-1.51806	-1.2255	-0.994993	-1.20513	-1.30706	-0.98576	-0.821881	-0.703434	-1.26809	-0.788675	-0.855087	-2.16973	-1.01024	-1.37421	-0.856166	-1.55409	-1.29481	-1.3193	-1.21522	-1.23578	-1.52472	-0.465265	NA	0.956396	1.03447	2.22113	1.78427	2.46665	2.20067	0.911098
419	AGBL1	0.0204981	0.128274	-0.171698	0.0196563	-0.0108534	-0.220568	-0.359878	-0.316769	-0.124367	-0.867698	0.147942	0.249819	-0.0402346	-0.14809	-0.012223	0.0515356	0.128279	-0.149986	0.0704295	0.186119	-0.0132572	-0.33014	NA	0.500787	0.458847	0.318759	0.197729	0.455498	0.382779	0.33272
420	AGBL2	-0.17793	-0.00237043	-0.224275	-0.243364	0.0280025	-0.0625411	0.143028	0.163806	-0.288889	0.294316	-0.0082592	0.0288883	-0.317843	-0.244834	0.127469	-0.614197	0.0378705	0.0181344	0.0462497	-0.0509906	-0.525495	0.0769443	NA	0.256314	0.42151	0.412289	0.697569	0.283166	1.04772	0.395412
421	AGBL3	0.0154156	0.12532	0.186207	-0.229719	0.037778	-0.129172	-0.0591382	0.0691039	-0.327448	-0.320101	0.201825	0.0855461	-0.00459538	-0.034704	-0.307149	-0.152289	0.0250207	0.0505353	0.131554	0.119085	0.107926	0.264489	NA	0.28228	0.261109	0.413413	0.339595	0.363959	0.739006	0.593615
422	AGBL4	0.0553118	0.189025	0.0248205	0.111576	-0.106383	-0.209915	0.0980584	-0.0746469	-0.345183	0.0527172	0.1434	0.0738185	0.0360639	0.056053	0.0187911	0.20436	-0.13222	-0.0805473	0.319935	0.0581151	0.0956029	-0.0459619	NA	0.26647	0.66832	0.399027	0.392501	0.166063	0.660212	0.237584
423	AGBL5	0.139375	0.0604404	-0.000660675	0.1626	-0.158162	0.592497	0.0657887	0.668038	0.516956	0.349556	-0.217978	0.201289	0.000396256	0.21644	0.0999005	0.2253	-0.265214	-0.0511106	-0.011032	0.131913	-0.0467038	0.0453825	NA	1.23012	0.247268	0.677781	0.858913	0.470505	0.545483	0.181029
424	AGER	0.18669	-0.254334	-0.163779	-0.0326081	-0.0946537	-0.0364734	0.157965	-0.337329	0.264382	0.132456	0.183474	0.344213	0.027569	0.188288	0.020269	-0.0854853	-0.0993873	-0.0899201	-0.288274	-0.220394	0.0853528	-0.412911	NA	0.511485	0.278029	0.841638	0.180907	0.140525	0.3932	0.360389
425	AGFG1	-0.131177	-0.11298	-0.0705838	-0.102013	-0.421109	0.213475	0.159281	-0.018776	0.445726	0.303631	0.0149305	-0.265095	-0.149414	0.0209783	0.0743817	-0.278408	-0.608772	-0.233446	-0.0743086	-0.151652	-0.021299	-0.119868	NA	0.693146	0.374718	0.372634	0.214041	0.599024	0.298847	0.238963
426	AGFG2	0.226084	0.272173	0.148606	0.231919	0.190744	0.400272	0.265723	0.380101	0.420444	0.254835	0.276611	0.202702	0.230607	0.244942	0.227846	0.235992	0.115168	0.266319	0.219635	0.324712	0.211205	0.0860069	NA	1.40428	0.61519	1.48413	1.39014	0.569221	1.28749	0.430199
427	AGGF1	-0.0964459	0.0617935	0.273023	0.0469393	-0.0945867	-0.448072	-0.112132	-0.237455	-0.658689	-0.587608	0.363343	-0.08401	-0.0494489	-0.155879	0.153602	-0.0597234	-0.0496272	-0.139546	0.196658	-0.0730712	0.704967	-0.158921	NA	0.372373	0.533986	0.262807	0.377962	0.220761	0.551332	0.415439
428	AGK	-0.149386	-0.352908	-0.0227913	-0.272953	-0.0483727	0.189866	-0.289864	0.138408	0.241324	-0.250721	-0.329007	0.246006	-0.567458	-0.126706	-0.441143	-0.104763	0.156412	-0.253158	-0.416943	-0.288872	0.161296	-0.206879	NA	0.458003	0.245357	0.37059	0.470794	0.402519	0.840568	0.330441
429	AGL	-0.155828	-0.284589	0.032066	-0.262672	-0.0398689	-0.400686	-0.375133	-0.42889	-0.372483	-0.22465	-0.525617	-0.147566	-0.134512	-0.185407	-0.0338508	-0.491494	-0.0893616	0.00962385	-0.437304	-0.131873	-0.0855893	0.149721	NA	0.537026	0.511738	0.333482	0.624328	0.162967	0.421046	0.230844
430	AGMAT	-0.0944474	-0.237649	0.118558	-0.269377	-0.149147	0.0150186	0.322961	-0.184287	0.214324	0.601302	0.0446198	-0.0438288	0.042571	-0.282084	-0.493957	-0.0447964	-0.259037	-0.0392575	-0.116962	-0.358337	0.333166	-0.096051	NA	0.35637	0.571287	0.294136	0.445303	0.394981	0.341826	0.502165
431	AGMO	0.00285859	0.220574	0.282986	0.0387281	0.151404	0.386075	0.173162	0.484997	0.287152	0.089178	0.257145	-0.274016	0.166225	0.116366	-0.136914	0.21437	0.131392	0.171416	0.392978	0.0481691	0.247401	0.318571	NA	0.939266	0.477087	0.498941	0.539576	0.712646	0.549644	1.98632
432	AGO1	-0.256913	-0.07872	-0.0102331	-0.110426	-0.0993712	-0.10807	0.11375	-0.3787	0.16256	0.340652	-0.113152	-0.153113	-0.413216	-0.204409	-0.213977	-0.00687494	0.0267677	-0.22551	-0.181727	0.0242872	0.033596	-0.0540621	NA	0.241292	0.31599	0.427128	0.430024	0.823648	0.301908	0.269589
433	AGO2	-0.0248143	-0.000943462	-0.118799	-0.0552203	-0.190325	-0.0768073	0.106354	-0.0633351	-0.0902795	0.261567	-0.0488584	-0.130411	0.0650476	-0.00907953	-0.0784539	-0.0319867	-0.181437	-0.199212	-0.339305	0.337418	0.096689	-0.334286	NA	0.220494	0.309379	0.308035	0.208966	0.463372	0.683055	0.228593
434	AGO3	-0.0397277	0.0458901	-0.0534633	-0.066704	-0.0595182	-0.276686	0.248329	-0.223833	-0.329538	0.231628	0.26503	0.216023	-0.122438	-0.212768	-0.125919	-0.00748931	0.0189353	-0.137972	0.0693663	0.0224139	-0.137078	0.0301517	NA	0.237168	0.668785	0.281498	0.360638	0.516655	0.392636	0.277601
435	AGO4	-0.061994	-0.0521437	-0.169136	-0.0373218	-0.0735615	-0.563506	0.0137974	-0.982485	-0.144528	0.0752396	-0.0476449	-0.124198	-0.0508581	-0.0109259	-0.122891	0.0482476	-0.137233	-0.00989004	0.0113614	-0.115649	-0.135235	-0.203036	NA	0.665961	0.223045	0.142668	0.568381	0.169819	0.218589	0.22564
436	AGPAT1	-0.0727232	-0.308126	0.135514	-0.221862	0.0860711	-0.403836	-0.118275	-0.72795	-0.0797224	-0.237203	0.000652685	0.148664	-0.32115	-0.0456845	-0.241969	-0.201755	0.349251	-0.177109	-0.422665	-0.193588	0.183937	0.0870909	NA	0.485778	0.392904	0.223299	0.460936	0.325394	0.507631	0.380442
437	AGPAT2	-0.118064	-0.0498227	-0.108245	0.0273156	-0.0459498	0.055462	-0.357528	-0.355721	0.466645	-0.641532	-0.0735241	-0.111076	-0.184282	-0.0588333	0.167178	-0.112547	0.0306963	-0.122596	-0.0661437	-0.0335018	-0.0557697	-0.16072	NA	0.393495	0.304545	0.386158	0.549451	0.398891	0.194465	0.231702
438	AGPAT3	-0.1784	-0.23487	-0.0439376	-0.173325	-0.31888	-0.247712	-0.353962	-0.498503	0.00307907	-0.615959	-0.0919639	-0.238846	-0.157757	-0.138597	-0.250843	-0.0958071	-0.0580394	-0.579721	-0.370018	-0.0997216	0.00116965	-0.0890449	NA	0.331964	0.715897	0.369572	0.505254	0.395026	0.471746	0.147197
439	AGPAT4	0.12875	0.037199	0.0731412	0.0608652	-0.102479	0.020587	0.0171572	0.227847	-0.186673	0.281498	-0.247184	0.0209877	0.254363	0.110901	0.157756	-0.0360254	-0.129194	-0.0757642	0.0910981	-0.0167001	-0.0674405	0.213723	NA	0.319438	0.440225	0.619789	0.97689	0.187123	0.372665	0.333576
440	AGPAT5	0.0212816	0.0507042	0.190284	0.0362799	0.0171595	0.279546	0.0137488	0.368187	0.190905	0.0647956	-0.0372979	-0.000334693	0.185574	-0.121395	-0.0954315	0.167991	0.00319589	0.0311231	0.159714	-0.0583051	0.0728365	0.307731	NA	1.1798	0.114554	0.428291	0.382386	0.201515	0.56982	0.833389
441	AGPS	-0.207809	-0.332407	-0.113059	-0.391911	-0.400525	-0.500399	-0.0335312	-0.448486	-0.552313	-0.469602	0.40254	-0.16482	-0.356866	-0.101741	-0.26312	-0.520702	-0.311641	-0.489408	-0.302752	-0.362062	-0.101724	-0.124394	NA	0.543308	0.547187	0.366532	0.803903	0.843498	0.485545	0.432568
442	AGR2	-0.000178673	0.0508821	0.273431	0.0513178	0.272207	-0.173593	0.19565	-0.279595	-0.067591	0.183315	0.207985	-0.119005	0.0720848	0.0463846	-0.0852359	0.187871	0.342917	0.201497	-0.0141319	0.115896	0.439907	0.106956	NA	0.210278	0.421063	0.216096	0.358526	0.70137	0.323887	1.23357
443	AGR3	-0.0208579	-0.0459759	0.0944986	0.0534974	-0.0332217	0.0817917	0.168057	-0.0902009	0.253784	0.0239805	0.312134	-0.0970684	-0.00128154	0.0357763	0.189544	-0.0825492	0.0493501	-0.115793	0.0503904	-0.142342	0.232712	-0.0437152	NA	0.584226	0.320182	0.276544	0.31007	0.377221	0.358308	0.469263
444	AGRN	-0.188774	-0.0161549	-0.215674	-0.0567428	-0.0271329	-0.109753	-0.351145	0.0672922	-0.286798	-0.458894	-0.243396	-0.148652	-0.256775	-0.160894	-0.014648	-0.0988376	0.0365623	-0.0908282	0.050894	-0.0832039	-0.115409	-0.315939	NA	0.273558	0.516777	0.396856	0.232136	0.18018	0.312761	0.456174
445	AGRP	-0.0224458	0.0817522	0.296338	0.211175	0.193563	0.0810186	-0.227587	0.192874	-0.0308369	-0.410487	-0.0446873	-0.0218231	0.0473221	-0.0928364	0.182911	0.239438	0.227724	0.159402	-0.0285349	0.192039	0.355906	0.23677	NA	0.344468	0.358025	0.510042	0.884921	0.781399	0.729985	0.815656
446	AGT	-0.056398	-0.225278	-0.0213032	-0.133384	0.309656	0.174097	0.2477	0.0720967	0.276098	-0.0503998	0.5458	0.0256547	-0.0650543	-0.129794	-0.242845	-0.023922	0.503126	0.116187	-0.113556	-0.337	-0.178376	0.13577	NA	0.82472	0.551484	0.651695	0.348756	0.583076	0.357877	0.328735
447	AGTPBP1	0.188583	-0.107253	0.303893	-0.0143602	0.358198	-0.0723513	-0.0610546	-0.217996	0.0732938	-0.309579	0.18747	0.244499	0.205851	0.115399	-0.234055	0.205334	0.372144	0.344252	0.162336	-0.376842	0.103681	0.504105	NA	0.241751	0.382952	0.779892	0.8489	1.34806	0.391688	0.830986
448	AGTR1	-0.224959	-0.291467	0.294038	-0.0286594	0.0288029	-0.618613	-0.61725	-0.774011	-0.463215	-1.24702	0.0125153	-0.257961	-0.333336	-0.0835816	0.0262882	-0.0836069	0.268198	-0.210593	-0.0186776	-0.564257	0.230457	0.357618	NA	0.61711	0.430026	0.335358	0.474961	0.28171	0.261941	0.83221
449	AGTR2	0.0469975	-0.00427776	-0.0214667	-0.0905179	-0.0609478	0.0119333	-0.141305	-0.0649037	0.0887703	-0.0803457	-0.202265	0.033862	0.0905922	0.0165383	-0.0062176	-0.174818	0.00986918	-0.131765	0.0906434	-0.099199	-0.0674264	0.0244931	NA	0.52	0.231732	0.554396	0.344842	0.164351	0.596116	0.618253
450	AGTRAP	0.213673	0.327366	0.40302	0.318805	0.209245	-0.0967291	0.194275	0.156399	-0.349857	0.164349	0.224202	0.0869662	0.312661	0.24139	0.381257	0.256353	-0.142987	0.561477	0.289964	0.364768	0.238086	0.567954	NA	0.222272	0.74665	0.815309	1.27608	0.82842	1.42258	1.1498
451	AGXT	-0.00597928	-0.0787959	-0.263704	0.150367	-0.0351189	-0.0482969	0.0902401	-0.225966	0.129372	0.159866	0.0206142	0.0566438	0.223596	-0.298178	0.131409	0.169325	-0.0922421	0.0220044	-0.139565	-0.0180272	0.214808	-0.742215	NA	0.37105	0.153295	0.496209	0.515287	0.180696	0.30163	0.532584
452	AGXT2	0.0096104	0.0275941	0.0599429	-0.212639	0.0270252	-0.321876	0.124368	-0.286349	-0.357403	0.161173	0.0875619	-0.254428	0.0246269	0.258632	-0.178446	-0.246831	0.197425	-0.143375	0.0805015	-0.0253133	-0.0967532	0.216639	NA	0.36728	0.669802	0.332547	0.302579	0.428181	0.269089	0.774174
453	AHCTF1	-0.808407	-0.749225	-0.635916	-0.825888	-0.727742	-1.18901	-0.892553	-1.40926	-0.968759	-1.16553	-0.619574	-0.79035	-0.722323	-0.912548	-0.805033	-0.846743	-0.666894	-0.78859	-0.909982	-0.588468	-0.517041	-0.75479	NA	2.31618	1.47444	2.10182	2.8775	1.34086	1.97553	1.12481
454	AHCY	-1.27079	-0.9705	-1.37676	-1.68863	-1.52031	-1.12697	-1.07445	-0.821483	-1.43246	-0.665494	-1.4834	-1.17498	-1.16662	-1.47076	-2.01649	-1.36077	-1.31054	-1.73008	-1.11121	-0.829788	-1.96752	-0.786011	essential_DepMap	1.53634	1.15098	2.07779	2.24049	2.31367	1.61307	2.03008
455	AHCYL1	-0.290162	-0.469047	0.0818184	-0.24431	0.0525415	-0.155524	-0.750695	-0.078213	-0.232835	-0.627111	-0.874279	-0.737813	0.109192	-0.241867	-0.241582	-0.247038	0.00437572	0.100707	-0.438675	-0.499418	-0.0764499	0.240087	NA	0.419811	0.94471	0.568636	0.555737	0.473209	1.16533	0.500368
456	AHCYL2	0.140863	0.0572811	0.0171902	-0.0252179	0.23625	0.192772	0.315576	0.156548	0.228996	0.557067	0.0740841	0.0351021	0.164609	0.222879	0.0741553	-0.124591	0.454028	0.0184718	-0.0929215	0.207484	0.0103806	0.0239998	NA	0.539583	0.501835	0.563837	0.204047	0.430657	0.28669	0.602835
457	AHDC1	0.179054	-0.0161375	-0.0160011	-0.121825	-0.146775	0.0232644	-0.0070891	0.103825	-0.0572959	0.16796	-0.182138	0.0891464	0.331838	0.116178	-0.173553	-0.0700975	-0.204562	-0.088987	-0.063355	0.03108	0.122452	-0.154455	NA	0.395062	0.23104	0.649752	0.146914	0.507152	0.372133	0.240143
458	AHI1	0.0525796	0.114524	-0.0578424	-0.214923	0.0530303	0.182415	0.259712	0.452695	-0.0878661	0.549246	-0.0298223	-0.0298244	0.138077	0.0494865	0.0991139	-0.528959	0.146469	-0.0404082	0.087419	0.14163	0.269269	-0.384954	NA	0.590139	0.580407	0.625252	0.295346	0.396455	0.498961	0.296382
459	AHNAK	0.212502	0.507472	0.375776	0.130932	0.133578	0.293186	0.324467	0.481488	0.104884	0.235029	0.413904	0.116575	0.24769	0.273242	-0.0921239	0.353988	0.310308	-0.043152	0.533084	0.48186	0.34538	0.406172	NA	0.758007	0.700929	1.02965	0.626565	0.502821	2.15379	1.27254
460	AHNAK2	0.308173	0.171702	0.212776	0.164394	0.292527	0.464594	0.37895	0.310338	0.618851	0.999391	-0.241491	0.217623	0.220621	0.486275	0.235909	0.092879	0.240801	0.344252	-0.0134416	0.356845	0.221737	0.203815	NA	0.780836	1.52321	0.946922	0.586657	1.079	0.97745	0.647297
461	AHR	-0.0405928	-0.14944	-0.155785	-0.0626839	-0.347361	-0.163689	-0.388254	-0.150544	-0.176835	-0.572626	-0.203882	0.167646	-0.0566286	-0.232796	-0.164245	0.0388768	-0.33768	-0.357043	-0.0697832	-0.229096	-0.215591	-0.09598	NA	0.152131	0.505213	0.251812	0.319791	0.656848	0.366168	0.250198
462	AHRR	0.168001	-0.0175967	0.14043	-0.0311281	-0.0511701	0.124896	-0.128832	0.267602	-0.0178105	-0.129976	-0.127688	0.197522	0.314782	-0.00830069	-0.0211624	-0.0410938	-0.0281148	-0.0742254	-0.00959043	-0.0256029	-0.110368	0.391229	NA	0.497914	0.263508	0.595166	0.251014	0.242942	0.501538	0.364522
463	AHSA1	0.0548385	0.0316423	-0.0263398	0.169396	0.136381	0.127259	-0.0269876	0.102701	0.151818	0.0745392	-0.128514	0.328472	-0.00612408	-0.157833	0.136623	0.202168	0.0335196	0.239242	-0.01641	0.0796945	-0.238033	0.185354	NA	0.49745	0.132904	0.444906	1.39514	0.39385	0.319121	0.226795
464	AHSA2	0.0167861	-0.211251	0.0438416	0.0295109	-0.0753631	0.208052	-0.294464	-0.121771	0.537876	-0.352383	-0.236545	0.0997939	-0.110128	0.0606924	0.157029	-0.0980071	-0.319693	0.168967	-0.274418	-0.148084	0.253813	-0.16613	NA	0.457572	0.399741	0.350665	0.522119	0.168149	0.44283	0.262235
465	AHSG	-0.114092	-0.311377	-0.348902	-0.116113	-0.0245552	-0.143254	0.589168	-0.00532107	-0.281186	0.573535	0.604801	0.0482698	-0.418378	0.0278334	-0.29365	0.0614239	-0.177095	0.127984	-0.144293	-0.478461	0.132165	-0.829968	NA	0.353283	1.4283	0.268411	0.595549	0.412424	0.448507	0.333499
466	AHSP	-0.0204431	0.168497	-0.0500622	0.0251079	0.0258648	0.45065	0.295835	0.438764	0.462536	0.317725	0.273944	-0.131271	0.165934	-0.095992	-0.220312	0.270528	0.104711	-0.0529815	-0.0128016	0.349795	-0.451217	0.351092	NA	1.08393	0.825142	0.324222	0.750731	0.475181	1.15606	0.475617
467	AICDA	0.101502	0.0182674	0.229401	0.215901	-0.0941776	0.191199	0.491266	0.288196	0.0942014	0.0630056	0.919527	0.17712	0.0537298	0.0736574	0.313217	0.118586	-0.248584	0.060229	-0.0285803	0.0651152	0.287816	0.170985	Nonessential_DepMap	0.445311	0.480236	0.405607	0.725729	0.17889	0.346252	0.701474
468	AIDA	0.0819778	-0.12939	-0.017031	0.034383	-0.0273389	0.142563	-0.0595484	0.0665239	0.218602	0.350007	-0.469104	0.0133271	0.0921097	0.140497	0.0483445	0.0204215	-0.0147748	-0.0399031	-0.259254	0.000473346	0.121455	-0.155517	NA	0.534141	0.496584	0.716699	0.470499	0.196826	0.318822	0.238076
469	AIF1	0.02149	-0.186308	-0.129102	-0.0238703	-0.184795	0.0234105	-0.0143104	0.0418135	0.00500762	-0.148436	0.119815	-0.174101	0.105091	0.13348	-0.146294	0.0985538	-0.179305	-0.190285	-0.0237891	-0.348827	-0.123821	-0.134384	NA	0.208759	0.183126	0.500313	0.247437	0.285038	0.402321	0.278095
470	AIF1L	-0.269303	0.0928686	0.0511524	-0.171682	-0.0481982	-0.0706217	-0.153761	-0.16148	0.0202365	0.168224	-0.475746	-0.0939828	-0.25645	-0.457478	0.0398342	-0.383198	-0.375567	0.279171	0.0631483	0.122589	0.172653	-0.0703485	NA	0.373326	0.543368	0.524329	0.443185	0.343437	0.38063	0.319338
471	AIFM1	-0.583322	-0.490828	-0.507775	-0.738457	-0.51394	-0.610111	-0.598482	-0.918513	-0.30171	-0.158506	-1.03846	-0.546957	-0.800447	-0.402563	-0.601676	-0.875239	-0.352848	-0.675032	-0.522944	-0.458712	-0.349651	-0.665899	essential_DepMap	0.774709	0.814379	1.37675	1.42767	0.746639	1.12433	0.572806
472	AIFM2	-0.144304	-0.108246	-0.133696	-0.302163	-0.223722	-0.0227266	-0.317304	0.170583	-0.216036	-0.0687592	-0.565849	-0.232966	-0.118377	-0.0815707	-0.376029	-0.228297	-0.474271	0.0268283	0.122447	-0.338938	-0.435975	0.168584	NA	0.246513	0.572725	0.347754	0.518937	0.517891	0.266598	0.43807
473	AIFM3	-0.0298952	0.175263	0.0210932	0.0751249	-0.0950771	-0.0571091	0.112579	0.0735988	-0.187817	0.13718	0.0879788	0.0926667	-0.132272	-0.0500801	0.136051	0.0141986	-0.0873121	-0.102842	0.290824	0.0597024	0.146336	-0.10415	NA	0.465161	0.381711	0.368556	0.431845	0.278461	0.589453	0.208748
474	AIG1	0.0311697	-0.282	-0.00878423	0.0723057	0.0260686	0.297262	-0.119696	0.276179	0.318346	0.20474	-0.444132	0.148971	0.0467721	-0.102234	0.199359	-0.0547481	0.213558	-0.16142	-0.325995	-0.238005	0.195435	-0.213004	NA	0.604647	0.453951	0.353596	0.514404	0.694294	0.60313	0.571015
475	AIM2	0.13356	0.0696212	-0.0974984	-0.0450312	-0.0978848	0.0953173	-0.100508	-0.0632938	0.253928	-0.25792	0.0569044	-0.0182961	0.201564	0.217414	-0.107604	0.0175414	-0.178469	-0.0173004	0.11981	0.0194322	-0.0798168	-0.11518	NA	0.45185	0.48809	0.565431	0.42979	0.456503	0.399152	0.33771
476	AIMP1	-0.0915514	-0.0650767	-0.0756432	-0.317381	-0.0433674	-0.461987	0.0710888	-0.220622	-0.703352	0.316013	-0.173836	-0.0770314	0.0108745	-0.208497	-0.376363	-0.2584	-0.289427	0.202692	0.179333	-0.309486	-0.285576	0.13429	NA	0.766433	0.225563	0.299296	0.626206	0.513711	0.302374	0.549816
477	AIMP2	-0.445114	-0.0841912	-0.180485	-0.11922	-0.69615	-0.274062	-0.289484	-0.0878886	-0.460235	-0.217326	-0.361641	-0.567792	-0.551793	-0.215755	-0.144733	-0.0937065	-0.2148	-1.1775	-0.228156	0.0597739	-0.314838	-0.0461316	NA	0.458739	0.502511	0.649752	0.685566	0.784221	0.397734	0.24723
478	AIP	-0.0839994	0.0339224	-0.00915494	0.0451878	-0.11283	0.0693335	-0.0250733	-0.117196	0.255863	0.0249525	-0.0750991	0.0318419	-0.0989295	-0.184911	0.0924451	-0.00206961	-0.242561	0.0169014	0.115334	-0.0474891	-0.0164863	-0.00182363	NA	0.460142	0.133099	0.286509	0.383677	0.320327	0.32429	0.219982
479	AIPL1	-0.196131	0.0205251	-0.0785706	0.0495056	-0.130488	-0.239722	-0.116616	-0.275891	-0.203552	-0.132715	-0.100516	-0.328147	-0.0625508	-0.197694	-0.0764086	0.17542	-0.0636894	-0.197287	0.0336317	0.00741838	-0.234519	0.0773779	Nonessential_DepMap	0.599994	0.226254	0.276544	0.524336	0.246088	0.361296	0.306783
480	AIRE	-0.00525812	0.0936459	-0.357874	0.181654	0.273922	0.312305	0.233119	0.230553	0.394058	0.345703	0.120534	-0.235619	0.154788	0.0650566	0.238645	0.124663	0.342664	0.205179	0.200428	-0.0131364	-0.398948	-0.3168	NA	0.585829	0.306911	0.480172	0.587682	0.738227	0.298855	0.485459
481	AJAP1	0.0907249	-0.113881	0.30262	0.152535	0.0062102	0.0766908	0.127891	0.159828	-0.00644592	0.42854	-0.172757	-0.0842033	0.18967	0.166709	0.101915	0.203155	-0.302492	0.314913	0.120915	-0.348677	0.345348	0.259892	NA	0.579821	0.536272	0.460924	0.820721	0.847221	0.315918	0.808577
482	AJUBA	0.303094	0.613874	0.421128	0.383811	0.302471	0.420585	0.615587	0.177956	0.663213	0.582072	0.649101	0.166873	0.36226	0.380151	0.583423	0.1842	0.31102	0.293921	0.593474	0.634275	0.463467	0.37879	NA	0.837731	2.37914	1.72816	1.20867	1.03445	3.41335	1.78751
483	AK1	0.0811641	0.208088	0.0188095	0.0946892	0.0334334	0.0856941	0.0595139	-0.0279882	0.199376	-0.0769891	0.196017	0.0595041	0.112976	0.0710121	0.0697571	0.119621	0.058826	0.00804087	0.238422	0.177753	0.163531	-0.125912	NA	0.392191	0.404058	0.47237	0.49953	0.264389	0.837929	0.438463
484	AK2	-0.20104	-0.0663256	-0.134606	-0.11665	0.0314979	0.0352798	-0.259288	0.254094	-0.183535	-0.10227	-0.416307	-0.029905	-0.255251	-0.317965	-0.0873867	-0.145914	0.117602	-0.0546065	0.0423748	-0.175026	-0.154477	-0.114736	NA	0.434223	0.307611	0.565431	0.288028	0.343878	0.289908	0.118079
485	AK3	-0.134238	0.0552371	-0.0431982	-0.0143437	0.129475	-0.184373	0.11148	-0.282163	-0.0865833	-0.156787	0.379746	0.000881403	-0.216798	-0.186797	0.0781363	-0.106824	0.117118	0.141831	-0.117531	0.228005	0.0519657	-0.138362	NA	0.470948	0.379219	0.255707	0.542519	0.307382	0.448709	0.327403
486	AK4	-0.301796	-0.0429194	-0.236201	-0.0705218	-0.233789	-0.0246653	-0.237579	0.101176	-0.150507	-0.198065	-0.277094	-0.276763	-0.380456	-0.248171	-0.0852734	-0.0557703	-0.1698	-0.297777	0.0635749	-0.149414	-0.50772	0.0353172	NA	0.291966	0.336836	0.737549	0.187846	0.246168	0.26187	0.660166
487	AK5	-0.119565	-0.277176	0.0733049	-0.10679	-0.260408	-0.0185127	0.0251931	-0.128607	0.091582	-0.0448455	0.0952317	-0.251014	-0.113277	0.00559623	-0.205491	-0.00808845	-0.157708	-0.363108	-0.205389	-0.348963	-0.137397	0.284007	NA	0.428297	0.288125	0.372634	0.224561	0.512437	0.422606	0.386888
488	AK6	-1.05202	-1.11069	-0.929294	-0.960496	-0.762737	-0.989195	-1.0686	-0.97064	-1.00775	-0.992295	-1.14491	-1.00657	-1.20598	-0.943501	-0.533314	-1.38768	-0.665859	-0.859615	-1.0398	-1.18158	-1.23518	-0.623405	NA	1.31781	1.26099	2.64397	1.47359	1.54856	2.88579	1.26993
489	AK7	0.246458	0.226363	0.0262251	0.29836	-0.149141	0.0795026	0.236428	0.0655608	0.0934444	-0.0281682	0.501025	0.100434	0.301834	0.337107	0.196463	0.400257	-0.0378506	-0.260431	0.444226	0.0084995	0.0544668	-0.00201658	NA	0.733145	0.501027	0.869666	1.54468	0.601756	0.491989	0.346913
490	AK8	-0.00383015	-0.199321	-0.114437	-0.232237	-0.15318	0.221067	0.203188	0.414638	0.0274965	0.0472228	0.359152	0.0386557	-0.0209081	-0.029238	-0.234764	-0.229709	-0.279053	-0.0273081	0.00910921	-0.407752	-0.301758	0.0728846	NA	0.599282	0.610161	0.257275	0.38842	0.419526	0.41887	0.578161
491	AK9	0.0978602	0.170276	0.14004	0.00279882	0.150671	-0.0436442	0.113367	-0.278494	0.191206	0.294822	-0.068087	0.110768	0.101884	0.0809288	-0.0646003	0.070198	0.179823	0.121519	0.0623019	0.27825	-0.0748657	0.354946	NA	0.25448	0.405707	0.764472	0.512084	0.565974	0.881342	0.503793
492	AKAIN1	0.126191	0.124796	0.191469	0.0839288	0.192028	0.307351	0.256513	0.383483	0.231218	0.410189	0.102837	0.305344	-0.00767332	0.080902	0.0134871	0.15437	0.294134	0.0899222	0.071038	0.178554	0.26034	0.122599	NA	0.787175	0.804693	0.667562	0.399423	0.851104	0.764971	0.498393
493	AKAP1	-0.0313425	0.00805046	-0.366321	0.0646347	-0.0470069	0.0755645	-0.085662	-0.143738	0.294867	0.103599	-0.274923	-0.172788	-0.101571	0.180332	0.071992	0.0572774	-0.248642	0.154628	0.0489356	-0.0328347	-0.412551	-0.320091	NA	0.48451	0.195247	0.254925	0.299811	0.349527	0.502573	0.615512
494	AKAP10	0.0784476	0.0741672	0.135406	-0.0662741	-0.024843	0.1873	0.156901	0.206646	0.167955	0.112697	0.201106	0.0517168	0.196276	-0.0126501	-0.127099	-0.00544954	0.123299	-0.172984	-0.0416669	0.190001	0.15786	0.112951	NA	0.671896	0.336153	0.481486	0.292481	0.308132	0.995954	0.448611
495	AKAP11	-0.0807319	0.00350986	-0.164834	0.0378342	-0.265507	0.242558	0.0398034	0.599858	-0.114743	0.301639	-0.222032	0.0138871	-0.112639	-0.143444	-0.101365	0.177033	-0.00153171	-0.529482	-0.0127414	0.0197611	-0.102653	-0.227015	NA	0.409683	0.388526	0.306273	0.483227	0.692643	1.47612	0.327034
496	AKAP12	0.188633	0.0109249	0.291241	0.196506	-0.100835	0.230394	-0.711396	0.186373	0.274416	-1.03175	-0.39104	-0.151399	0.177914	0.539383	0.309528	0.0834839	0.0377919	-0.239461	-0.0810974	0.102947	0.24055	0.341932	NA	0.76301	0.578881	1.12784	0.523442	0.488522	0.45592	1.01567
497	AKAP13	0.0637235	0.00875878	0.0506178	0.0870071	0.20073	0.088463	-0.00863084	0.382509	-0.205583	0.143865	-0.161127	-0.0409006	0.199424	0.0326475	0.0263537	0.147661	0.0927761	0.308685	-0.113494	0.131012	-0.0220405	0.123276	NA	0.59043	0.579566	0.29243	0.565878	0.637034	0.343121	0.423639
498	AKAP14	-0.0363753	-0.0434843	-0.194491	0.102659	0.0200311	-0.100172	0.23178	-0.270009	0.069665	0.238352	0.225208	0.125116	-0.135857	-0.0983849	0.184312	0.021006	0.156193	-0.116131	-0.0965334	0.00956489	-0.240561	-0.148422	NA	0.157647	0.533162	0.185752	0.485415	0.35031	0.118926	0.391511
499	AKAP17A	-0.235069	-0.252829	-0.177667	-0.158714	-0.320793	-0.291931	-0.299631	-0.340345	-0.243517	-0.343122	-0.25614	-0.0738359	-0.39013	-0.241242	-0.106581	-0.210846	-0.332038	-0.309549	-0.235619	-0.270038	-0.229454	-0.125879	NA	0.352818	0.512289	0.596879	0.444567	0.565383	0.712098	0.416682
500	AKAP2	0.0830523	0.177748	0.239631	0.177083	-0.168604	-0.056232	0.447734	0.0201198	-0.132584	0.506248	0.38922	0.0125537	0.144663	0.09194	0.124531	0.229635	-0.388173	0.0509644	0.114264	0.241233	0.554114	-0.0748532	NA	0.603949	1.40738	0.50724	0.869027	0.447971	0.773506	0.604
501	AKAP3	0.307062	0.273666	-0.0415718	0.298043	-0.075409	0.339613	0.355083	0.253819	0.425407	0.412905	0.297262	0.522474	0.192578	0.206134	0.273139	0.322947	-0.202074	0.051256	0.303247	0.244086	-0.307956	0.224813	NA	0.78063	0.825353	0.90309	1.06023	0.673136	1.0861	0.319859
502	AKAP4	0.169242	-0.06343	-0.182546	-0.142817	0.0166695	0.450101	-0.0679067	0.500293	0.399909	-0.266325	0.130511	0.0714517	0.174575	0.2617	-0.118463	-0.167171	0.00868107	0.0246579	-0.118222	-0.00863821	-0.430226	0.0651337	NA	0.982992	0.516926	0.829738	0.258817	0.230685	0.995193	0.412519
503	AKAP5	0.00757476	0.159596	0.0999698	0.144602	-0.0636967	-0.0811937	-0.00599136	-0.289536	0.127149	0.0680798	-0.0800625	-0.10873	0.105561	0.0258931	0.109126	0.180078	0.0216923	-0.149086	0.267848	0.0513438	0.0474594	0.15248	NA	0.287771	0.332328	0.281498	0.737727	0.302936	0.726617	0.340117
504	AKAP6	0.00653762	-0.0185441	0.00934958	0.0281989	0.028052	0.0947103	-0.0391776	0.125692	0.0637292	-0.00729878	-0.0710564	0.038189	0.197528	-0.216105	-0.029613	0.0860108	0.133093	-0.0769893	-0.0764839	0.0393957	0.00740427	0.0112949	NA	0.657427	0.383388	0.392545	0.500325	0.422324	0.24933	0.264868
505	AKAP7	-0.00619533	0.0701072	-0.0108808	-0.021757	-0.00927025	-0.0167105	-0.314805	-0.049339	0.015918	-0.776114	0.146505	0.0405626	-0.0384428	-0.0207057	-0.017067	-0.026447	-0.136865	0.118324	0.0758572	0.0643572	-0.0371378	0.0153763	NA	0.280395	0.486846	0.20204	0.319297	0.726976	0.464586	0.303465
506	AKAP8	-0.065328	-0.00403049	-0.149929	0.0631195	0.134426	-0.11144	0.0393977	0.00445075	-0.227331	0.0630289	0.0157665	-0.0995192	0.0291063	-0.125571	0.0331834	0.0930556	0.241224	0.0276281	-0.0344361	0.0263751	-0.1462	-0.153658	NA	0.30093	0.225669	0.363512	0.443885	0.372726	0.206447	0.252588
507	AKAP8L	-0.440124	-0.483133	-0.38022	-0.479937	-0.457222	-0.584651	-0.319612	-0.0959333	-1.07337	-0.327643	-0.311582	-0.526902	-0.359324	-0.434146	-0.370701	-0.589172	-0.236662	-0.677782	-0.169368	-0.796897	-0.554104	-0.206337	NA	0.573391	0.583414	1.17134	0.68856	0.642972	0.543967	0.587318
508	AKAP9	-0.190126	0.0636402	0.209019	-0.108826	0.0375501	-0.167359	0.458925	-0.251135	-0.0835823	0.479017	0.438833	-0.293004	-0.212438	-0.0649364	-0.0489408	-0.168711	0.0756748	-0.000574661	0.0498239	0.0774565	0.382699	0.0353389	NA	0.228982	1.17552	0.406714	0.150178	0.140378	0.279485	0.415999
509	AKIP1	0.0226003	0.0945236	0.0811112	-0.0744372	0.0176869	-0.103182	-0.444755	0.0974837	-0.303848	-0.394852	-0.494658	-0.000519375	-0.120216	0.188536	0.0430047	-0.191879	0.194391	-0.159017	-0.0211536	0.210201	-0.104348	0.26657	NA	0.213082	0.565024	0.386158	0.184595	0.279779	1.01274	0.509697
510	AKIRIN1	-0.228101	-0.282445	-0.203085	-0.340062	-0.241677	-0.234146	-0.19115	-0.26134	-0.206952	-0.219225	-0.163075	-0.10619	-0.322541	-0.25557	-0.293066	-0.387058	-0.202856	-0.280497	-0.107473	-0.457418	-0.0743059	-0.331863	NA	0.334719	0.248271	0.761954	0.843867	0.412609	0.315909	0.32274
511	AKIRIN2	-0.980678	-0.973953	-1.77004	-1.10308	-0.696316	-0.831611	-1.51769	-0.0489594	-1.61426	-0.842872	-2.19252	-1.20658	-1.05106	-0.684395	-0.774103	-1.43207	-0.0707895	-1.32184	-1.52787	-0.420036	-2.47871	-1.06136	essential_DepMap	0.982164	1.25056	1.80134	2.18031	0.379791	0.977948	1.88842
512	AKNA	0.194049	0.222172	0.14642	0.150056	0.0264523	-0.0290996	0.203056	-0.0139909	-0.0442082	0.563301	-0.157188	0.156425	0.344156	0.0815667	0.231279	0.0688341	-0.187183	0.240088	0.260385	0.183959	-0.0926156	0.385456	NA	0.380578	0.658656	1.1261	0.630107	0.611604	0.818156	0.67435
513	AKNAD1	-0.250945	-0.194058	-0.107639	-0.424408	-0.232252	-0.490523	-0.586557	-0.153834	-0.827212	-0.0660828	-1.10703	-0.513028	-0.175608	-0.0641992	-0.334294	-0.514522	-0.154405	-0.310099	-0.183532	-0.204585	-0.134588	-0.0806913	NA	0.63762	0.662591	0.359519	0.937535	0.360543	0.40542	0.169402
514	AKR1A1	0.0450028	-0.0458324	0.122856	-0.0178754	0.0389866	-0.0490374	0.067	-0.0112229	-0.0868518	-0.102263	0.236263	0.0998606	0.0190607	0.0160871	-0.043404	0.0076531	0.0753312	0.00264211	-0.0112173	-0.0804474	0.0456527	0.200059	NA	0.265516	0.267401	0.425969	0.231784	0.276848	0.135477	0.422411
515	AKR1B1	0.112824	-0.0530483	0.0329721	0.180455	0.195749	0.240392	0.22395	-0.164959	0.645742	0.413465	0.0344342	0.0205676	0.279079	0.0388245	0.17011	0.1908	0.204148	0.18735	-0.0918591	-0.0142376	0.00790555	0.0580387	NA	0.672865	0.613651	0.452225	0.843557	0.566486	0.194428	0.500698
516	AKR1B10	-0.0646157	0.202662	-0.0904956	0.20986	-0.117257	-0.0312432	-0.0180595	0.158681	-0.221167	-0.211139	0.17502	-0.149713	-0.0578998	0.0137653	0.216279	0.203441	-0.0498571	-0.184657	0.181186	0.224137	-0.0743372	-0.106654	NA	0.310176	0.346435	0.316053	1.36652	0.594107	0.981551	0.412362
517	AKR1B15	-0.0621545	0.0507997	0.034759	0.0964184	0.185142	0.301808	0.220763	0.0104547	0.593161	0.104004	0.337523	-0.144039	-0.0662364	0.0238117	0.0616283	0.131208	0.186028	0.184255	0.0342962	0.0673031	0.00743038	0.0620875	NA	0.541323	0.340089	0.50724	0.737739	0.659546	0.826118	0.403145
518	AKR1C1	-0.00432127	0.185342	0.157562	0.263315	0.172362	0.0616708	0.246366	-0.0459231	0.169265	0.311141	0.18159	0.0533102	-0.110886	0.0446121	0.229056	0.297575	0.10794	0.236785	0.126777	0.243907	0.227486	0.0876383	NA	0.698818	0.924563	1.383	1.74	1.17535	1.83472	1.02068
519	AKR1C2	0.0141255	0.00523867	-0.144009	-0.042801	0.118616	-0.165555	-0.101719	0.377842	-0.708952	-0.236938	0.0334997	0.0572972	0.15828	-0.173201	-0.136437	0.0508354	0.227509	0.00972382	-0.129444	0.139921	-0.288307	0.000289167	NA	0.647547	0.323512	0.422508	0.0909631	0.695326	0.273	0.308742
520	AKR1C3	-0.048988	0.143375	-0.247447	0.0358454	-0.0758388	0.264873	0.110522	0.276202	0.253544	0.159057	0.0619864	-0.389132	0.174701	0.067467	0.129543	-0.0578525	0.0180659	-0.169744	0.362839	-0.0760886	-0.364694	-0.130199	NA	0.660678	0.405956	0.405607	0.387826	0.557472	0.433174	0.395293
521	AKR1C4	-0.00630709	0.0457867	0.268437	-0.021164	0.0168925	0.264152	0.147659	0.218766	0.309538	-0.209567	0.504885	-0.253981	0.0239973	0.211062	-0.0988868	0.0565589	0.235167	-0.201382	0.154314	-0.0627405	0.260147	0.276727	NA	0.703346	0.683371	0.357535	0.522796	0.277013	0.768492	0.976017
522	AKR1D1	-0.116907	-0.0119306	-0.0177842	-0.0790174	-0.0731773	-0.0772389	-0.128898	0.169173	-0.323651	-0.11147	-0.146327	-0.192209	-0.0630339	-0.095479	-0.108039	-0.0499952	0.00821742	-0.154572	-0.167186	0.143325	0.0504619	-0.0860302	NA	0.4853	0.138364	0.293282	0.303093	0.182504	0.39937	0.175194
523	AKR1E2	0.0145679	0.0962234	0.00376881	0.102972	0.0778921	-0.0697772	0.187428	-0.015508	-0.124046	0.373603	0.00125218	0.0740052	0.0118817	-0.0421832	0.155122	0.0508232	-0.145152	0.300937	-0.046305	0.238752	-0.00111221	0.00864982	NA	0.26245	0.639463	0.264401	0.539801	0.349134	0.571007	0.284306
524	AKR7A2	-0.108524	0.0829492	0.0530844	0.202508	-0.0255436	-0.252352	-0.018777	-0.513995	0.00929007	0.0777923	-0.115346	-0.0443615	-0.00117949	-0.28003	0.131498	0.273517	0.0890172	-0.140104	-0.0908791	0.256778	0.0168502	0.0893186	NA	0.315047	0.163524	0.325139	0.990987	0.263249	0.424091	1.20781
525	AKR7A3	0.041447	0.115672	0.127094	0.0972768	0.136257	0.0920573	0.0976167	0.0596211	0.124493	0.157025	0.038208	0.09222	-0.133345	0.165467	0.0795963	0.114957	0.17536	0.0971539	0.0139494	0.217394	0.117194	0.136995	NA	0.514896	0.280909	0.364516	0.547776	0.572977	0.512394	0.452921
526	AKT1	0.0434363	-0.106832	0.0897644	0.164677	0.0383133	0.191743	0.207479	0.342983	0.0405025	0.197377	0.217581	-0.00605648	0.108874	0.027491	0.193013	0.136341	-0.0932274	0.169854	-0.294953	0.081289	0.0566808	0.122848	NA	0.464427	0.593221	0.978811	0.701267	0.52348	0.288496	0.408763
527	AKT1S1	-0.0847709	-0.355464	-0.347332	0.116112	-0.459473	-0.198442	-0.147597	0.0121402	-0.409023	-0.480731	0.185537	-0.0430541	-0.0356538	-0.175605	0.182357	0.0498672	-0.0398766	-0.879069	-0.27767	-0.433257	-0.393236	-0.301429	NA	0.269908	0.319642	0.364516	0.412244	0.573813	0.610533	0.518866
528	AKT2	-0.211355	-0.162861	-0.168769	-0.108373	-0.129537	-0.511294	-0.114973	-0.655825	-0.366763	-0.199302	-0.0306439	-0.135785	-0.153768	-0.344512	0.0376471	-0.254394	-0.271506	0.0124315	-0.18905	-0.136672	-0.33313	-0.00440906	NA	0.59779	0.153864	0.371611	0.239649	0.275094	0.240049	0.288767
529	AKT3	0.223963	0.360083	0.275436	0.120667	-0.265046	0.489376	0.106495	0.250161	0.728591	0.235613	-0.0226219	0.321385	0.195766	0.154737	0.101206	0.140129	-0.480605	-0.049486	0.230127	0.49004	-0.00944071	0.560312	NA	0.992233	0.168153	0.764472	0.636144	0.634522	1.00624	1.3812
530	AKTIP	-0.0870969	-0.110869	-0.316404	-0.346505	-0.314653	-0.00994387	-0.264226	0.144611	-0.164499	-0.364391	-0.16406	-0.118677	-0.280404	0.137791	-0.512997	-0.180012	0.048518	-0.677823	-0.159254	-0.0624847	-0.534491	-0.0983172	NA	0.209546	0.389037	0.372634	0.881811	0.683551	0.165875	0.396466
531	ALAD	-0.666476	-1.60334	-2.56666	-1.27396	-0.423276	-0.774292	-0.349568	-0.539416	-1.00917	-0.141712	-0.557425	-0.374797	-0.750219	-0.874412	-1.22923	-1.31869	-0.753415	-0.093136	-1.66895	-1.53773	-3.2972	-1.83612	NA	1.49297	0.448233	1.82974	4.07912	0.454274	3.97121	3.70415
532	ALAS1	-0.576398	-1.72892	-1.23116	-1.23993	-0.784882	-0.550334	-0.563229	-0.193467	-0.907201	-0.328086	-0.798372	-0.311585	-0.52876	-0.888847	-1.09395	-1.38591	-0.857199	-0.712566	-1.47758	-1.98026	-1.00621	-1.45611	NA	0.899771	0.789919	1.2993	4.68952	2.55272	5.81446	2.58723
533	ALAS2	-0.0883099	-0.171715	0.257077	0.061349	0.00959785	-0.348133	0.290058	-0.611208	-0.0850569	0.237309	0.342806	-0.45903	0.127084	0.0670171	0.297662	-0.174964	-0.0403043	0.0595	-0.166696	-0.176735	0.220771	0.293384	NA	0.419155	0.637367	0.381952	0.50502	0.250298	0.245067	1.01359
534	ALB	0.0204588	0.164874	-0.105404	0.199985	0.045698	-0.245724	-0.141252	-0.59418	0.102733	-0.107059	-0.175446	0.123902	-0.0214383	-0.041088	0.174061	0.225909	0.0519415	0.0394545	0.242654	0.087095	-0.33409	0.123282	NA	0.299244	0.181867	0.330683	0.890339	0.492495	0.66741	0.306018
535	ALCAM	-0.137773	-0.11969	-0.126866	-0.0113344	0.117145	0.146289	0.0493709	0.49315	-0.200572	0.0108421	0.0878997	-0.119552	0.0149391	-0.308706	0.0359784	-0.0586471	0.0423994	0.191891	-0.119903	-0.119478	-0.172611	-0.08112	NA	0.508332	0.395553	0.347754	0.185676	0.380948	0.078985	0.312551
536	ALDH16A1	-0.530648	-0.811819	-0.56535	-0.490915	-0.400677	-0.710593	-0.50343	-0.433178	-0.988008	-0.796279	-0.210582	-0.70625	-0.339067	-0.546628	-0.674042	-0.307787	-0.329525	-0.471829	-0.919144	-0.704495	-0.794111	-0.33659	NA	1.02122	0.679003	1.1209	1.19238	0.820606	1.44987	1.24062
537	ALDH18A1	-0.0333066	-0.0566395	-0.000827642	-0.175497	-0.0409304	0.344331	-0.874808	0.04077	0.647893	0.0568964	-1.80651	-0.398999	0.218594	0.0804857	-0.00771523	-0.343279	-0.109401	0.0275406	-0.14935	0.0360709	-0.165876	0.16422	NA	0.44919	0.637054	0.303644	0.370025	0.423365	0.205773	0.398826
538	ALDH1A1	0.22836	-0.0663556	0.0996013	0.0688266	0.0912299	0.278525	0.307835	0.253521	0.30353	0.356031	0.259639	0.131003	0.205361	0.348715	0.0593875	0.0782657	0.265661	-0.0832008	0.0364085	-0.16912	0.191127	0.00807528	NA	1.01926	0.796737	1.04818	0.817197	0.274734	0.454489	0.504414
539	ALDH1A2	-0.0876299	-0.1753	-0.0187754	-0.0291546	0.0509681	-0.305723	-0.388128	-0.546457	-0.0649884	-0.706267	-0.0699883	-0.116363	-0.134326	-0.0122009	-0.0614912	0.00318204	-0.128887	0.230823	-0.326442	-0.0241578	-0.0122306	-0.0253202	NA	0.852197	0.540644	0.192465	0.170764	0.345876	0.638036	0.204808
540	ALDH1A3	-0.0747819	0.0331056	0.242509	0.0716423	0.15686	0.161084	0.200337	-0.0556926	0.37786	0.0587875	0.341886	-0.142192	-0.104589	0.0224353	0.0942211	0.0490635	0.448067	-0.134347	0.0391853	0.0270258	0.230415	0.254602	NA	0.497839	0.381439	0.341989	0.484683	0.726534	0.28698	0.818457
541	ALDH1B1	0.0258764	-0.0253452	-0.0213701	0.0866848	0.0327548	-0.420749	-0.238741	-0.786326	-0.0551715	0.136542	-0.614024	-0.0136864	-0.0194576	0.110773	0.234944	-0.0615743	0.0122081	0.0533014	0.112466	-0.163156	-0.0560514	0.0133112	NA	0.514185	0.409638	0.327902	0.368749	0.214311	0.334993	0.2436
542	ALDH1L1	0.111186	0.119937	-0.37362	0.0519284	0.0103767	0.362074	-0.114122	0.28854	0.435608	-0.311961	0.0837162	0.0786456	0.0839394	0.170972	0.0749658	0.0288911	-0.300099	0.320853	0.202701	0.037172	-0.53152	-0.215719	NA	1.31557	0.155001	0.521434	0.356473	0.279208	0.517405	0.470243
543	ALDH1L2	-0.120245	0.0311743	0.215846	-0.0610979	-0.063261	0.0397747	0.0146668	-0.166316	0.245866	0.118611	-0.0892777	0.0358955	-0.352698	-0.0439315	-0.0159305	-0.106265	-0.10048	-0.0260418	-0.108183	0.170531	0.357849	0.0738439	NA	0.332711	0.204144	0.286509	0.22755	0.148892	0.299413	0.616289
544	ALDH2	0.100363	-0.0296061	0.0757842	0.103152	0.156978	0.09994	-0.0727962	0.115544	0.0843364	-0.18513	0.0395378	0.0390091	0.185077	0.0770011	0.141355	0.0649494	0.0528109	0.261146	-0.103749	0.0445367	-0.0205382	0.172107	NA	0.402574	0.197048	0.798603	0.627354	0.461075	0.356616	0.524278
545	ALDH3A1	-0.0397985	-0.0209932	0.0814961	-0.0693834	-0.0307757	-0.0663363	-0.425174	-0.0800557	-0.0526169	-0.721474	-0.128874	0.0238612	0.0596074	-0.202864	-0.110212	-0.0285544	-0.0307373	-0.030814	-0.191289	0.149302	-0.00561848	0.168611	NA	0.505428	0.374281	0.159267	0.143706	0.185822	0.232325	0.343633
546	ALDH3A2	0.216139	-0.0807139	0.506871	0.231585	0.374262	0.197559	0.463771	0.271982	0.123136	0.218483	0.709058	0.297843	0.0144554	0.33612	-0.00983624	0.473007	0.452	0.296525	-0.259177	0.0977489	0.361233	0.65251	NA	0.562368	0.730598	0.703335	2.23393	1.46075	0.792241	1.20005
547	ALDH3B1	0.0570289	-0.248593	-0.139866	-0.273965	-0.140871	0.233082	-0.408637	0.0959587	0.370206	-0.360181	-0.457092	0.105621	-0.126925	0.19239	-0.503349	-0.0445815	-0.462481	0.180739	-0.029228	-0.467957	0.0876555	-0.367387	NA	0.741998	0.446295	0.372634	0.367522	0.466492	0.351769	0.602842
548	ALDH3B2	0.122214	-0.00605657	-0.018421	0.102246	0.0736929	-0.166746	0.261988	-0.0757121	-0.25778	0.313943	0.210034	0.0432828	0.0466462	0.276713	0.0671468	0.137346	0.0615251	0.0858606	-0.0433218	0.0312087	-0.0114552	-0.0253868	NA	0.244624	0.5541	0.725842	0.627263	0.210825	0.325433	0.300839
549	ALDH4A1	-0.0959966	0.0490206	0.0582314	-0.0918908	0.214308	-0.184413	0.219348	-0.324624	-0.0442022	-0.0649823	0.503677	-0.0996252	-0.0346479	-0.153717	-0.161038	-0.0227431	0.0844925	0.344123	0.143983	-0.0459418	0.113336	0.00312718	NA	0.154	0.336874	0.203426	0.152153	0.501164	0.49743	0.519677
550	ALDH5A1	-0.0696806	-0.139365	0.21286	-0.0075457	0.255147	0.0873296	0.0536522	-0.358794	0.533454	0.191688	-0.084384	0.105114	-0.0390074	-0.275149	-0.13847	0.123378	0.290201	0.220092	-0.36759	0.0888611	0.636094	-0.210375	NA	0.524522	0.340864	0.215383	0.437541	0.968345	0.213486	0.543142
551	ALDH6A1	-0.120014	0.00400925	0.00297366	0.0943541	-0.160578	-0.0168522	0.109616	0.200993	-0.234697	0.0900574	0.129174	-0.100567	-0.110022	-0.149453	0.0885774	0.100131	-0.271092	-0.0500646	0.0111446	-0.00312609	0.0331104	-0.027163	NA	0.279047	0.356671	0.229148	0.572668	0.29054	0.386771	0.15926
552	ALDH7A1	0.00341184	0.229307	0.0358959	-0.0727502	-0.0935	-0.16369	0.238894	-0.0958665	-0.231513	-0.0420058	0.519793	0.0170674	-0.134551	0.12772	-0.209853	0.0643527	-0.221581	0.0345807	0.0540555	0.404559	0.120296	-0.0485041	NA	0.222443	0.552004	0.142668	0.216021	0.0809559	0.660901	0.219262
553	ALDH8A1	0.097013	0.344329	0.0283924	0.092558	-0.00293001	-0.114091	-0.274057	-0.0138155	-0.214366	-0.0891391	-0.458976	0.000928074	0.252931	0.0371795	0.138799	0.0463174	-0.215926	0.210066	0.272989	0.41567	-0.0280892	0.084874	NA	0.26166	0.396314	0.554396	0.384687	0.329453	1.32733	0.2159
554	ALDH9A1	-0.11888	-0.201726	0.0305484	-0.0983612	-0.133079	-0.0179834	0.237971	-0.119402	0.0834352	0.241037	0.234905	-0.127371	-0.194931	-0.0343388	-0.109789	-0.0869338	-0.180096	-0.0860627	-0.327407	-0.0760443	-0.363922	0.425018	NA	0.293308	0.517012	0.177178	0.312204	0.213632	0.354303	0.306545
555	ALDOA	-1.44546	-1.04677	-1.542	-1.90873	-1.36802	-1.42866	-1.36756	-1.32693	-1.53039	-1.53178	-1.20335	-1.31999	-1.42458	-1.59182	-2.00874	-1.80872	-1.76749	-0.968549	-1.16486	-0.928676	-1.85765	-1.22635	essential_DepMap	4.20135	3.03759	6.37059	6.59176	3.42947	4.18575	3.86973
556	ALDOB	-0.0175996	0.068232	0.0114879	0.139061	0.173488	0.316977	0.274173	0.333741	0.300214	0.145943	0.402403	-0.0325619	-0.0143626	-0.0058742	0.237322	0.0408009	0.186119	0.160856	0.168624	-0.0321604	0.0777136	-0.0547377	NA	0.723872	0.344357	0.204815	0.649313	0.572408	0.692346	0.190915
557	ALDOC	-0.167389	-0.320217	-0.225756	-0.199091	-0.274186	-0.0599599	-0.600157	-0.332502	0.212582	-0.759561	-0.440754	-0.0852101	-0.198436	-0.218522	-0.33756	-0.0606226	-0.323791	-0.224581	-0.407613	-0.232821	-0.214693	-0.23682	NA	0.498236	0.979429	0.546682	0.461613	0.455293	0.541028	0.329898
558	ALG1	-0.97948	-1.21925	-0.96322	-1.09849	-0.881338	-0.686352	-1.08006	-0.65813	-0.714575	-1.42609	-0.734031	-0.758414	-1.1201	-1.05992	-1.47256	-0.724418	-0.87086	-0.891816	-1.18857	-1.24994	-0.944598	-0.981842	essential_DepMap	1.50221	2.19163	3.10902	3.68492	1.97254	3.31563	1.59292
559	ALG10	0.0957794	0.0838078	-0.00276155	0.223872	0.194713	0.0463143	0.341825	0.170686	-0.0780578	0.58036	0.10329	-0.155166	0.250678	0.191826	0.169508	0.278236	0.150621	0.238805	0.140633	0.0269829	-0.0747545	0.0692314	NA	0.367183	0.549798	0.478862	1.17607	0.76607	0.732746	0.151192
560	ALG10B	-0.312857	-0.153342	-0.0881605	-0.320327	-0.395811	-0.500588	-0.623222	-0.759907	-0.24127	-0.681464	-0.56498	-0.313286	-0.235756	-0.389531	-0.300748	-0.339906	-0.330957	-0.460665	-0.148769	-0.157915	-0.0694827	-0.106838	NA	0.70857	0.898855	0.640165	0.659655	0.677843	0.387969	0.342571
561	ALG11	-1.0567	-1.48521	-1.11506	-1.86039	-1.59409	-1.94718	-0.699699	-2.42898	-1.46539	-0.423694	-0.975704	-1.00817	-1.24978	-0.912146	-1.13263	-2.58816	-1.4106	-1.77757	-1.51864	-1.45179	-1.09326	-1.13686	essential_DepMap	1.58032	0.78894	1.77989	3.32798	2.50689	1.96424	2.2773
562	ALG12	-0.213467	-0.122673	-0.587188	-0.0408522	-0.0299884	-0.304419	-0.253655	-0.55047	-0.0583689	-0.270823	-0.236488	-0.00771595	-0.386406	-0.246278	0.190992	-0.272697	-0.172077	0.1121	-0.0255021	-0.219844	-0.150038	-1.02434	NA	0.365845	0.356839	0.365523	0.37108	0.394523	0.237562	0.507977
563	ALG13	-1.66365	-1.29034	-2.10928	-1.04764	-0.998241	-1.16088	-1.84433	-1.3525	-0.969263	-1.99709	-1.69157	-1.14231	-1.86312	-1.98553	-1.17613	-0.91914	-1.03951	-0.956968	-1.19724	-1.38343	-1.30896	-2.90959	essential_DepMap	2.05837	2.40979	2.73049	2.16143	1.55882	2.0002	2.48495
564	ALG14	-0.70713	-0.855826	-0.945662	-0.835409	-0.667777	-0.997919	-1.10404	-0.874814	-1.12102	-1.45123	-0.756846	-0.696816	-0.813236	-0.611339	-0.613887	-1.05693	-0.128726	-1.20683	-0.723272	-0.988381	-0.91306	-0.978265	essential_DepMap	2.00353	1.60268	1.82974	2.52365	0.581147	2.08985	1.28312
565	ALG1L	-0.280451	-0.311956	-0.327715	-0.0701878	-0.293457	0.297625	0.0351534	0.110051	0.485198	-0.0401351	0.110442	-0.331727	-0.394662	-0.114963	0.0102331	-0.150609	-0.2359	-0.351015	-0.268878	-0.355033	-0.188219	-0.467211	NA	0.545381	0.261802	0.528708	0.224044	0.540178	0.426102	0.566078
566	ALG1L2	-0.936988	-0.671945	-1.51259	-0.873574	-1.20909	-0.854151	-0.981871	-1.07364	-0.634657	-0.881006	-1.08274	-1.23312	-0.700681	-0.877165	-1.03138	-0.715772	-0.501801	-1.91637	-0.311964	-1.03193	-0.91849	-2.1067	NA	1.27663	1.37014	1.6925	1.28487	1.30465	0.670583	1.54301
567	ALG2	-1.48657	-1.28555	-2.27461	-2.23262	-2.98092	-1.59175	-3.21627	-1.43827	-1.74524	-4.79768	-1.63486	-1.8661	-1.06093	-1.53267	-2.09706	-2.36817	-2.99808	-2.96376	-0.766805	-1.8043	-1.65015	-2.89907	essential_DepMap	2.63967	3.56907	2.92812	3.73805	3.11813	1.84365	2.88153
568	ALG3	0.050163	-0.281933	-0.276507	-0.073954	0.00674196	-0.130606	-0.463193	-0.00194187	-0.259269	-0.578526	-0.347861	0.0944335	0.178981	-0.122926	-0.0890631	-0.0588449	0.0940512	-0.0805672	-0.269745	-0.29412	-0.659758	0.106745	NA	0.292034	0.606118	0.327902	0.210705	0.241607	0.584282	0.415323
569	ALG5	-0.324792	-0.449039	-0.324594	-0.409735	-0.492878	-0.478273	-1.10492	-0.411082	-0.545464	-1.19799	-1.01186	-0.242993	-0.42083	-0.310552	-0.269985	-0.549485	-0.284021	-0.701735	-0.251042	-0.647035	-0.309027	-0.340162	NA	0.88369	1.64671	0.754487	1.01483	0.567225	0.863119	0.692632
570	ALG6	-0.853302	-0.56775	-0.162278	-0.535768	-0.0615539	-0.869091	-1.41671	-1.01778	-0.720403	-1.98674	-0.846676	-1.12171	-1.05212	-0.38608	-0.344074	-0.727462	-0.0549131	-0.0681947	-0.605443	-0.530057	-0.308129	-0.0164283	NA	1.08961	2.10669	1.86328	1.03433	0.294816	1.22773	0.280288
571	ALG8	-0.272604	-0.0182359	-0.196103	-0.11386	-0.109906	0.011132	-0.115835	-0.0178047	0.0400687	-0.0984913	-0.133179	-0.305338	-0.4005	-0.111972	-0.182034	-0.0456866	-0.250248	0.0304358	0.0911051	-0.127577	-0.146832	-0.245373	essential_DepMap	0.357348	0.292089	0.480172	0.237764	0.188807	0.403304	0.572384
572	ALG9	-0.0512195	-0.133371	0.125817	-0.0629647	-0.309084	0.0191888	0.0504699	0.384125	-0.345748	0.25738	-0.15644	-0.161994	0.106429	-0.0980942	0.0776953	-0.203625	-0.291352	-0.326816	-0.0892347	-0.177507	-0.0280527	0.279687	NA	0.5524	0.257856	0.436519	0.555866	0.454211	0.336455	0.443437
573	ALK	0.00839928	0.224056	-0.1106	-0.136304	0.0894336	-0.0317181	0.138092	-0.153793	0.0903564	0.110673	0.16551	-0.0225585	-0.0245314	0.0722877	-0.0599545	-0.212654	0.304479	-0.125612	0.340338	0.107774	-0.0266032	-0.194597	NA	0.359533	0.41253	0.30103	0.213724	0.620957	0.644201	0.277909
574	ALKAL1	0.124508	-0.0548437	0.0483551	-0.014758	0.156161	0.172964	0.25499	0.026368	0.319559	0.397799	0.112181	0.189261	0.168087	0.0161764	-0.13903	0.109514	0.0503519	0.26197	-0.242859	0.133171	-0.0260998	0.12281	NA	1.17251	0.611739	0.709965	0.251366	0.519724	0.30398	0.341431
575	ALKAL2	0.0657409	0.0396871	0.154528	0.144244	0.0935078	0.565825	-0.124655	0.62224	0.50941	-0.112005	-0.137305	0.054917	0.0339965	0.108309	0.0649716	0.223516	0.213508	-0.0264925	0.00871752	0.0706566	0.261776	0.0472796	NA	1.92177	0.432485	0.449772	0.58872	0.435808	0.365185	0.433313
576	ALKBH1	-0.0641382	-0.00370469	-0.21782	-0.142933	0.208565	-0.0529946	-0.0482177	0.20871	-0.314699	0.1987	-0.295136	-0.0399045	0.00697424	-0.159484	-0.0220539	-0.263813	0.264638	0.152491	0.0304912	-0.0379006	-0.240984	-0.194656	NA	0.391041	0.20899	0.238824	0.213618	0.704897	0.139168	0.285281
577	ALKBH2	0.0844857	0.0170576	0.0760231	0.0165286	-0.0702667	0.00286225	0.0716589	0.0182829	-0.0125584	-0.0479622	0.19128	0.0938468	0.203326	-0.0437161	-0.0150747	0.0481319	-0.0924988	-0.0480347	-0.0324301	0.0665452	0.0316535	0.120393	NA	0.232785	0.573741	0.548214	0.451678	0.169171	0.306858	0.357827
578	ALKBH3	-0.0751028	-0.217068	-0.164437	-0.210006	-0.127059	-0.340778	-0.389822	-0.345241	-0.336315	-0.426464	-0.35318	-0.274269	0.0808581	-0.0318975	-0.134918	-0.285094	-0.109269	-0.144849	-0.397562	-0.0365742	-0.343991	0.0151161	NA	0.684996	0.510245	0.21254	0.356992	0.239604	0.401883	0.330167
579	ALKBH4	0.159613	0.091526	0.134291	0.148313	0.144154	0.243897	0.135983	0.179986	0.307808	0.0563827	0.215583	0.0695715	0.112386	0.296882	0.0950733	0.201553	0.186947	0.101361	0.140353	0.0426991	0.0844808	0.184102	NA	0.907318	0.353846	0.931814	0.843001	0.396953	0.736637	0.553952
580	ALKBH5	-0.088001	0.1029	-0.127506	-0.38735	-0.113303	0.136498	-0.0270598	0.418433	-0.145437	-0.151479	0.0973594	-0.0649198	-0.0713904	-0.127693	-0.25393	-0.520769	-0.0218364	-0.204769	0.118048	0.0877528	-0.126692	-0.128319	NA	0.348786	0.14496	0.360514	0.49447	0.441357	0.306176	0.300028
581	ALKBH6	-0.0580691	-0.153134	0.113754	-0.167819	-0.0615509	-0.230678	0.0741343	-0.340563	-0.120793	0.087497	0.0607716	-0.151093	0.0181131	-0.0412279	-0.0410458	-0.294592	-0.0818389	-0.0412628	-0.0377088	-0.268558	0.152905	0.0746028	NA	0.273407	0.484742	0.250264	0.304208	0.229376	0.230626	0.435151
582	ALKBH7	-0.264024	-0.32078	-0.481896	-0.185803	0.11813	-0.515084	-0.38963	-0.750459	-0.279708	-0.603959	-0.175302	-0.555251	-0.421671	0.18485	-0.492038	0.120431	0.138819	0.0974413	-0.450761	-0.190799	-0.842254	-0.121538	NA	0.323018	0.593264	0.408935	0.611393	0.524423	0.421298	0.460126
583	ALKBH8	-0.109289	-0.314486	-0.173232	-0.122388	-0.163236	-0.456729	0.0614122	-0.479045	-0.434413	0.00540297	0.117422	-0.182402	-0.104878	-0.0405869	-0.245533	0.000756846	-0.0973257	-0.229147	-0.386105	-0.242867	-0.0926834	-0.25378	NA	0.743715	0.333707	0.243364	0.296915	0.318167	0.697474	0.230372
584	ALLC	0.0300633	-0.0599033	0.0558022	0.14558	-0.25619	0.17523	0.311753	0.201887	0.148573	0.0734496	0.550055	-0.210837	0.264143	0.0368841	0.144967	0.146193	-0.195645	-0.316735	-0.101039	-0.0187673	0.0285623	0.083042	NA	0.618957	0.548171	0.416801	1.2038	0.624858	0.300934	0.566366
585	ALMS1	-0.134079	0.176814	-0.026516	-0.142109	-0.214761	-0.228566	-0.203898	-0.104547	-0.352585	-0.173005	-0.234791	-0.20689	-0.156067	-0.0392804	-0.0332763	-0.250941	-0.188781	-0.24074	0.169618	0.184009	-0.0328817	-0.0201504	NA	0.595731	0.388835	0.224026	0.385926	0.345737	0.671121	0.178493
586	ALOX12	0.0572955	0.119715	0.160414	0.189478	0.0620244	0.138981	0.117634	0.271994	0.00596768	0.458098	-0.22283	0.0366156	0.158247	-0.0229764	0.220164	0.158791	0.181855	-0.0578066	-0.0792257	0.318656	0.176569	0.144258	NA	0.592754	0.352036	0.435334	1.05722	0.364944	0.55639	0.471103
587	ALOX12B	-0.0897913	-0.135987	-0.122005	-0.161593	-0.141641	0.0172337	0.145687	-0.136299	0.170767	-0.122043	0.413416	-0.248567	-0.0648482	0.0440414	-0.0682941	-0.254893	-0.115338	-0.167944	-0.242929	-0.0290465	-0.146686	-0.0973232	NA	0.33788	0.319596	0.310691	0.31804	0.27408	0.251161	0.295961
588	ALOX15	-0.0123484	-0.17277	0.0214036	-0.0264589	-0.209763	0.222762	0.0137403	0.210785	0.234739	0.258182	-0.230701	-0.118118	0.238751	-0.157678	-0.0244348	-0.0284831	-0.220256	-0.19927	-0.238487	-0.107053	0.0475952	-0.00478793	NA	0.575478	0.273346	0.280669	0.413914	0.324552	0.158481	0.266398
589	ALOX15B	0.0845126	-0.0326899	-0.173875	-0.106706	0.0852976	-0.131465	0.376454	0.0574997	-0.32043	0.420991	0.331916	0.166013	0.158307	-0.0707818	-0.160967	-0.0524449	-0.0100522	0.180647	0.0518592	-0.117239	-0.172303	-0.175447	NA	0.412789	0.995296	0.578396	0.409426	0.373654	0.516299	0.342409
590	ALOX5	-0.0921768	-0.1569	0.2196	-0.185698	-0.225616	-0.320399	-0.450254	-0.360056	-0.280742	-0.598176	-0.302331	-0.083584	-0.0455814	-0.147365	-0.351798	-0.0195976	-0.133226	-0.318006	0.178703	-0.492504	0.394604	0.0445966	NA	0.374142	0.339785	0.261219	0.31759	0.229479	0.392872	0.844004
591	ALOX5AP	0.0884279	0.0242077	0.142803	0.0980342	0.185536	0.0114509	0.000741259	0.277509	-0.254607	0.156916	-0.155434	0.191828	-0.0343563	0.107812	0.100425	0.0956434	0.105373	0.265699	-0.0221196	0.070535	0.388171	-0.102564	NA	0.488253	0.207685	0.530178	0.63899	0.609015	0.462603	0.385171
592	ALOXE3	-0.0765909	-0.0168161	-0.0782588	-0.0787561	-0.100761	-0.147763	-0.0478929	-0.0686395	-0.226887	0.0421953	-0.137981	-0.00239486	-0.121358	-0.10602	-0.0966162	-0.060896	0.0130982	-0.214621	0.0445221	-0.0781543	-0.0705427	-0.0859749	NA	0.135631	0.18065	0.167491	0.146223	0.25395	0.35803	0.31804
593	ALPI	-0.019084	0.019298	-0.0645602	-0.0617391	-0.249347	0.00746575	-0.352121	0.463956	-0.449024	-0.587686	-0.116557	-0.016216	0.0462619	-0.0872979	-0.206706	0.0832281	-0.383801	-0.114894	-0.243894	0.28249	-0.0313935	-0.097727	Nonessential_DepMap	0.380048	0.547363	0.258061	0.260808	0.669312	0.395499	0.324002
594	ALPK1	0.000942457	-0.0537051	-0.225559	-0.12426	0.134446	-0.112826	0.130819	-0.179618	-0.0460346	0.283833	-0.0221956	0.125649	0.0370181	-0.15984	-0.0266475	-0.221873	0.0546696	0.214223	-0.0163611	-0.0910491	-0.201837	-0.249281	NA	0.685111	0.44798	0.454693	0.372281	0.548076	0.395553	0.857471
595	ALPK2	0.0381591	0.0968997	0.192618	0.0215293	0.15927	0.0456305	0.357818	0.124155	-0.0328941	0.4895	0.226135	0.125096	0.116833	-0.127451	-0.0399016	0.0829602	0.174176	0.144364	0.266736	-0.0729361	0.188501	0.196736	NA	0.20259	0.648774	0.277366	0.639208	0.435825	0.464206	0.843057
596	ALPK3	0.210925	-0.012245	-0.13286	0.0343445	0.132023	0.329845	0.29986	-0.0718811	0.731571	-0.103588	0.703307	0.252766	0.0853905	0.29462	-0.022753	0.091442	0.145248	0.118799	-0.0967769	0.0722869	-0.132269	-0.133451	NA	0.402108	0.456123	0.754487	0.361975	0.274297	0.176542	0.326887
597	ALPL	0.12806	-0.0684361	0.0572674	0.0401495	0.0252699	0.161188	0.107785	0.242582	0.0797944	-0.0106795	0.22625	-0.0495059	0.200736	0.23295	0.133149	-0.0528499	-0.0201743	0.0707141	-0.198255	0.0613827	-0.0475607	0.162096	NA	0.520036	0.284109	0.50724	0.66375	0.133739	0.86385	0.393232
598	ALPP	0.048374	0.150486	0.228863	0.0752378	0.0875588	0.111402	-0.0515185	0.121105	0.101699	0.154138	-0.257175	-0.0496213	-0.0204615	0.215205	0.155527	-0.00505133	-0.111985	0.287102	0.242507	0.0584654	0.306828	0.150897	NA	0.301252	0.354868	0.411168	0.493718	0.303872	0.727089	0.879821
599	ALPPL2	0.111935	0.0612485	0.0754187	0.210413	0.263116	0.104384	0.127081	-0.0257419	0.234511	0.415411	-0.161249	0.0611108	-0.0237469	0.29844	0.192488	0.228338	0.217755	0.308477	0.0334429	0.0890542	0.111048	0.0397889	NA	0.529347	0.765449	0.661544	1.13341	1.12127	0.414393	0.379115
600	ALS2	-0.143105	-0.0570131	-0.266369	-0.334882	-0.209455	0.0944976	0.239667	0.373519	-0.184524	0.256081	0.223253	-0.426608	-0.144829	0.142121	-0.481507	-0.188256	-0.403121	-0.0157895	-0.311936	0.19791	-0.172424	-0.360314	NA	0.322635	0.600993	0.352617	0.55396	0.45927	0.317197	0.608888
601	ALS2CL	-0.189347	0.214392	-0.0866036	-0.0520681	-0.116195	0.102674	0.0635082	0.209799	-0.00445008	0.0477208	0.0792955	-0.111775	-0.0895035	-0.366763	-0.134203	0.0300662	-0.486649	0.25426	0.135527	0.293258	-0.118489	-0.0547179	NA	0.586667	0.318845	0.316953	0.303504	0.302814	0.688341	0.358794
602	ALS2CR12	-0.231442	0.0113937	-0.362807	-0.17448	-0.046861	-0.044325	0.0431907	0.49315	-0.5818	0.463779	-0.377397	-0.201917	-0.377513	-0.114896	-0.00668483	-0.342274	-0.0269374	-0.0667846	-0.0500358	0.0728231	-0.525218	-0.200396	NA	0.348707	0.427328	0.346787	0.478293	0.362478	0.123704	0.394797
603	ALX1	0.0202105	0.0573947	-0.0228252	0.258059	0.133762	-0.481857	-0.416821	-0.349231	-0.614483	-1.04623	0.212586	0.0663179	0.0504034	-0.0560899	0.0686546	0.447464	0.154752	0.112771	0.17862	-0.06383	0.241756	-0.287407	NA	0.68723	0.398049	0.274905	0.593477	0.674936	0.375352	0.63382
604	ALX3	-0.0791224	-0.185524	-0.224563	-0.158356	-0.382004	-0.329455	0.0336067	-0.39058	-0.268329	-0.0546503	0.121864	-0.188629	-0.0790491	0.030311	-0.238405	-0.0783077	-0.318737	-0.445272	0.0273507	-0.3984	-0.156022	-0.293103	Nonessential_DepMap	0.356291	0.178231	0.224754	0.283604	0.578602	0.526015	0.338017
605	ALX4	-0.190354	-0.318495	-0.579634	-0.292225	-0.260145	-0.0495269	-0.647542	-0.0462086	-0.0528452	-0.783656	-0.511428	-0.183475	-0.266211	-0.121375	-0.155603	-0.428846	-0.267379	-0.252912	-0.42291	-0.214081	-0.656625	-0.502643	NA	0.218456	0.8642	0.356547	0.644099	0.278049	0.368465	1.13548
606	ALYREF	-0.759466	-0.830437	-0.695394	-1.01534	-1.37084	-0.987126	-1.39935	-1.30961	-0.664637	-1.39932	-1.39937	-1.11158	-0.7644	-0.402422	-1.04347	-0.987213	-1.73272	-1.00896	-0.59384	-1.06703	-0.809097	-0.581691	essential_DepMap	1.41372	3.18307	1.48812	1.6092	2.50295	1.55023	1.13393
607	AMACR	0.0573671	0.019351	-0.0248088	-0.0840937	-0.023445	-0.0219267	-0.184561	-0.197653	0.1538	-0.00912687	-0.359995	0.0775188	0.153397	-0.0588145	-0.0796291	-0.0885583	-0.0201122	-0.0267778	0.0630993	-0.0243974	-0.20239	0.152773	NA	0.311322	0.196871	0.380907	0.205352	0.247686	0.265748	0.258931
608	AMBN	-0.024388	-0.0717763	-0.109759	-0.112056	0.0599227	0.0361882	-0.0365575	0.148074	-0.0756978	-0.331043	0.257929	-0.212311	0.266376	-0.12723	-0.144054	-0.0800589	-0.156263	0.276109	-0.0491258	-0.0944269	-0.233229	0.0137123	NA	0.26858	0.38224	0.379864	0.138555	0.442891	0.159778	0.220743
609	AMBP	-0.0146557	0.218486	0.236082	0.0308919	-0.0334515	0.361914	-0.04099	0.0258405	0.697987	-0.450994	0.369014	-0.0126337	0.0885911	-0.119925	-0.130764	0.192548	0.101391	-0.168294	0.162155	0.274818	0.290161	0.182004	NA	0.924174	0.437077	0.318759	0.333646	0.284235	0.867465	0.798187
610	AMBRA1	-0.340177	-0.0284122	-0.201667	-0.254605	-0.250977	-0.430167	-0.714606	-0.394031	-0.466303	-0.742665	-0.686546	-0.369563	-0.358443	-0.292525	-0.332364	-0.176846	-0.0603225	-0.441632	0.0102493	-0.0670736	-0.108627	-0.294708	NA	0.46066	0.933544	0.978811	0.584593	0.481842	0.192573	0.422135
611	AMD1	-1.05184	-0.54063	-0.983549	-0.627626	-0.928364	-1.21458	-1.04953	-1.00787	-1.42129	-1.1488	-0.950258	-0.536957	-1.4931	-1.12545	-0.668083	-0.587169	-1.23127	-0.62546	-0.660951	-0.420308	-1.03425	-0.932844	essential_DepMap	1.46119	1.49975	1.52143	1.9611	2.37809	0.852001	1.50475
612	AMDHD1	0.0179788	-0.217316	0.138753	-0.0557818	-0.216366	-0.0601963	-0.0917394	-0.0857322	-0.0346604	0.107179	-0.290658	-0.0781782	0.0851122	0.0470023	-0.00267941	-0.108884	-0.117176	-0.315556	-0.444697	0.0100654	0.137898	0.139607	NA	0.416348	0.357021	0.268411	0.379999	0.346952	0.323828	0.467042
613	AMDHD2	0.112987	0.0928074	-0.050583	0.0211402	0.00392529	-0.23053	0.0732795	-0.203664	-0.257395	0.119234	0.0273251	0.193448	0.031505	0.114009	0.0317412	0.0105392	0.126014	-0.118164	0.0236996	0.161915	0.0709098	-0.172076	NA	0.231362	0.395261	0.653647	0.479497	0.245606	0.546865	0.339941
614	AMELX	0.0978938	0.223181	0.146599	0.158849	0.092533	0.237036	0.25799	0.264517	0.209554	0.135709	0.380271	0.0360622	-0.0614667	0.319086	0.162774	0.154925	0.0307336	0.154333	0.333847	0.112514	0.186303	0.106896	NA	0.697767	0.374348	0.580044	1.1075	0.230966	0.762437	0.596605
615	AMELY	0.136247	0.224433	0.291406	0.216309	-0.0741783	0.113781	0.365623	-0.125365	0.352927	0.626448	0.104799	0.102968	0.189776	0.115997	0.180778	0.251841	0.157435	-0.305792	0.289474	0.159391	0.3898	0.193012	NA	0.719097	0.425089	0.519993	0.956811	0.327482	0.903507	1.02942
616	AMER1	0.162075	0.0911485	0.161505	0.207714	0.106442	0.136963	0.0159107	-0.46947	0.743395	-0.0395528	0.0713741	0.246246	0.0687385	0.171241	0.27566	0.139769	0.142404	0.0704808	0.213053	-0.0307561	-0.000715364	0.323726	NA	0.371522	0.251548	0.718967	0.662651	0.345164	0.417579	0.671682
617	AMER2	0.120549	0.00152522	0.11954	-0.0777551	0.00476257	0.39703	0.332508	0.447513	0.346547	-0.0951495	0.760166	0.113015	0.223418	0.0252149	-0.17058	0.0150693	-0.0738111	0.0833362	0.0771442	-0.0740937	0.282365	-0.0432843	NA	0.817503	0.445725	0.59346	0.31289	0.208762	0.667521	0.565623
618	AMER3	-0.135453	-0.15791	-0.298055	-0.248468	0.0782251	-0.216436	-0.326774	-0.176799	-0.256073	-0.107955	-0.545593	-0.0506133	-0.0225124	-0.333233	-0.161646	-0.33529	0.208946	-0.0524957	-0.193793	-0.122028	-0.297174	-0.298936	NA	0.335278	0.63071	0.28735	0.667713	0.41895	0.300006	0.360369
619	AMFR	-0.0382326	0.160652	-0.081261	-0.0691298	0.0146851	0.0116546	-0.186067	-0.0841937	0.107503	-0.110265	-0.261869	-0.237386	0.124857	-0.00216867	-0.0478313	-0.0904282	-0.0767942	0.106164	0.196756	0.124548	-0.0472281	-0.115294	NA	0.223197	0.229852	0.428291	0.0664469	0.237659	1.00131	0.258801
620	AMH	0.159274	0.0844161	-0.0227941	0.0179912	0.0127559	0.252654	0.558522	0.406336	0.0989717	0.75759	0.359454	0.138577	0.0446318	0.294613	0.0030787	0.0329036	0.204645	-0.179133	0.135772	0.0330606	-0.129611	0.0840231	NA	0.708995	1.67028	0.537602	0.150624	0.722322	0.759148	0.242327
621	AMHR2	0.105442	-0.130845	-0.101245	0.0148725	0.00106143	0.256289	0.22821	0.42763	0.0849492	0.0738777	0.382543	0.0525902	-0.0627098	0.326445	0.0243752	0.00536977	-0.119817	0.12194	-0.19131	-0.0703813	-0.459775	0.257285	NA	0.553278	0.57449	0.522879	0.276663	0.439729	0.146798	0.345323
622	AMIGO1	-0.104133	-0.322995	-0.282049	-0.0687331	-0.303141	-0.264026	-0.232027	-0.515944	-0.012109	-0.0915011	-0.372552	-0.158413	-0.0572275	-0.0967574	0.0203823	-0.157848	-0.0836724	-0.522609	-0.248069	-0.397921	-0.40204	-0.162059	NA	0.397349	0.43371	0.317855	0.536226	0.495568	0.725015	0.380881
623	AMIGO2	0.0820955	0.113074	-0.0565458	-0.191592	-0.0698125	-0.127354	-0.0856562	-0.251307	-0.00340109	-0.114736	-0.0565769	0.153045	0.0915531	0.00168861	-0.177052	-0.206133	0.154719	-0.294344	0.151215	0.0749324	0.207915	-0.321007	NA	0.311607	0.116234	0.485452	0.534112	0.297591	0.446202	0.359663
624	AMIGO3	-0.178606	-0.0276019	-0.198164	0.073922	-0.0795052	0.161721	0.0657148	-0.0771168	0.400558	0.40843	-0.277	-0.155226	-0.258829	-0.121764	0.0488153	0.0990288	0.132493	-0.291503	-0.227716	0.172512	-0.262894	-0.133435	NA	0.742116	0.416392	0.289037	0.417425	0.264788	0.363452	0.355862
625	AMMECR1	0.131531	-0.0923045	-0.269641	-0.0310767	0.0544052	0.0818574	-0.649543	0.3446	-0.180885	-0.785609	-0.513476	0.334253	-0.0223275	0.0826678	-0.110243	0.0480893	0.117114	-0.00830331	-0.278111	0.0935016	-0.477623	-0.0616599	NA	0.371412	0.772242	0.744727	0.188643	0.750452	0.343255	0.453538
626	AMMECR1L	-0.272313	-0.242451	-0.408639	-0.202956	-0.305857	-0.519641	-0.421566	-0.327892	-0.711391	-0.161682	-0.681449	-0.335561	-0.271949	-0.209431	-0.285486	-0.120426	-0.158665	-0.45305	-0.378942	-0.10596	-0.391602	-0.425676	NA	0.677294	0.397396	0.559091	0.400641	0.566809	0.286404	0.867452
627	AMN	-0.00556024	-0.0830078	0.175649	0.0164969	0.099575	0.1029	-0.116539	-0.132912	0.338712	0.201012	-0.43409	-0.0464584	0.119125	-0.0893477	0.201272	-0.168279	0.254885	-0.055735	-0.171054	0.00503806	0.13171	0.219588	NA	0.405779	0.271731	0.216811	0.323654	0.517291	0.612245	0.558682
628	AMN1	0.275424	0.12111	0.160228	0.215752	0.145855	0.381243	0.147697	0.442135	0.320352	0.204	0.0913932	0.22071	0.395398	0.210163	0.204389	0.227114	0.112167	0.179543	0.131743	0.110476	0.178611	0.141846	NA	1.36972	0.368298	0.974694	1.22914	0.757211	0.878112	0.507875
629	AMOT	-0.00813392	0.16175	0.381333	0.0431999	-0.117896	0.232236	0.207038	0.179711	0.284761	0.239379	0.174697	0.0502367	-0.0348672	-0.0397712	-0.168297	0.254697	-0.388421	0.152629	0.355313	-0.0318129	0.169291	0.593375	NA	0.643945	1.33495	0.308035	0.587573	0.250156	0.879731	1.8605
630	AMOTL1	-0.184138	0.198034	-0.255881	-0.252113	-0.179014	0.10473	-0.350241	0.108457	0.101002	0.299086	-0.999569	-0.175648	-0.122041	-0.254724	-0.0813586	-0.422867	-0.349425	-0.00860283	0.411325	-0.0152565	-0.203753	-0.308009	NA	0.279431	0.321243	0.354578	0.422894	0.230752	0.347552	0.271407
631	AMOTL2	0.323362	0.2357	0.41101	0.393304	0.362562	0.428854	0.51799	0.309306	0.548401	0.585014	0.450967	0.332526	0.183494	0.454067	0.317639	0.46897	0.36581	0.359315	0.488788	-0.0173887	0.510879	0.31114	NA	0.721589	1.46719	1.12901	1.64383	1.22269	0.735499	0.996202
632	AMPD1	-0.350438	-0.57664	-0.584317	-0.078575	-0.289487	-0.549445	-0.0331276	-0.21357	-0.885321	0.253824	-0.320079	-0.447616	-0.553019	-0.050678	0.0318127	-0.188963	-0.232704	-0.34627	-0.29489	-0.858389	-0.545718	-0.622917	NA	0.529678	0.356784	0.555955	0.184585	0.753772	0.764774	1.0919
633	AMPD2	-0.283551	-0.218406	-0.338747	-0.379845	-0.404142	-0.482803	-0.130334	-0.561581	-0.404025	-0.376797	0.116128	-0.420494	-0.0928717	-0.337288	-0.615043	-0.144648	-0.283135	-0.52515	-0.242516	-0.194296	-0.173128	-0.504366	NA	0.45355	0.347971	0.455932	0.63345	0.621847	0.327893	0.357946
634	AMPD3	-0.137647	0.0379452	-0.134945	-0.19428	-0.187325	-0.648289	0.0313876	-0.48769	-0.808888	-0.043634	0.106409	-0.203877	0.00563837	-0.214701	-0.166754	-0.221806	-0.251366	-0.123283	-0.00751518	0.0834055	-0.26634	-0.00354942	NA	1.00093	0.227561	0.338187	0.490831	0.317277	0.334039	0.482758
635	AMPH	0.0376334	-0.087389	0.012875	0.121008	0.146178	0.272147	0.269646	0.0424671	0.501828	0.751519	-0.212228	-0.00945075	-0.141363	0.263714	0.100097	0.141919	0.253622	0.0387339	0.147228	-0.322006	0.171766	-0.146015	NA	0.742031	0.476558	0.408935	0.486862	0.836675	0.330869	0.318496
636	AMT	0.0401829	0.151953	-0.116602	-0.0570245	0.0934418	0.0875276	0.0624062	-0.120893	0.295948	0.498364	-0.373552	0.0188342	0.0794268	0.0222876	-0.0130085	-0.101041	-0.0681342	0.255018	0.115963	0.187942	-0.276517	0.043312	NA	0.325943	0.349045	0.649752	0.246635	0.299582	0.788492	0.190568
637	AMTN	-0.0732867	0.00420838	-0.0049406	-0.0781941	0.0095583	0.178985	0.116122	0.0794697	0.278501	-0.0290702	0.261314	-0.0284969	-0.172116	-0.0192467	-0.088932	-0.0674561	-0.0777165	0.0968331	-0.0504848	0.0589016	-0.0517568	0.0418756	NA	0.600352	0.403936	0.223299	0.0988279	0.168963	0.245434	0.237201
638	AMY1A	-0.891155	-0.960892	-0.956508	-0.956351	-0.844047	-0.946295	-0.844851	-0.904581	-0.988008	-0.894781	-0.794922	-0.728345	-1.11851	-0.826607	-1.10444	-0.808261	-0.773866	-0.914228	-0.895363	-1.02642	-0.822987	-1.09003	NA	1.48583	1.21058	1.82102	2.11639	1.40694	2.26839	1.35228
639	AMY1B	-0.780224	-1.09498	-1.40872	-1.00517	-0.81628	-1.37775	-1.27378	-1.78651	-0.968987	-1.55294	-0.994609	-0.772415	-0.768641	-0.799617	-1.01606	-0.994276	-0.675091	-0.957468	-1.0093	-1.18065	-1.40979	-1.40765	NA	2.48231	1.66702	2.77211	3.18612	2.36816	4.30016	3.02802
640	AMY1C	-0.853275	-1.02209	-0.745723	-0.659515	-0.96145	-0.799434	-1.33497	-0.273105	-1.32576	-1.61007	-1.05988	-0.650192	-0.806941	-1.10269	-0.649412	-0.669618	-0.816174	-1.10673	-0.918445	-1.12574	-0.600284	-0.891162	NA	0.711178	1.46177	1.75945	1.79072	1.67943	1.97886	1.00762
641	AMY2A	-0.833115	-0.60236	-0.724967	-1.10222	-0.580193	-0.376975	-0.185837	-0.147698	-0.606252	0.363766	-0.73544	-1.23459	-0.284599	-0.98016	-1.07798	-1.12647	-0.520554	-0.639832	-0.493854	-0.710865	-0.15643	-1.2935	NA	0.75413	0.560663	0.869666	2.39549	1.01948	0.946098	1.02331
642	AMY2B	-0.399211	-0.111449	-0.418553	-0.359772	-0.336483	-0.169147	-0.496672	-0.292105	-0.0461884	-0.393093	-0.600252	-0.428468	-0.412103	-0.357061	-0.365481	-0.354062	-0.249317	-0.423648	-0.0123134	-0.210584	-0.556783	-0.280323	NA	0.473428	1.04684	0.8041	0.773555	0.763805	0.532481	0.604848
643	AMZ1	-0.06927	0.0919056	-0.386947	-0.0895911	-0.378288	0.327742	-0.162573	0.754324	-0.0988408	0.169073	-0.494219	-0.0549206	-0.217295	0.0644053	-0.0352346	-0.143948	-0.509625	-0.246951	-0.0380158	0.221827	-0.265588	-0.508307	NA	0.52183	0.551371	0.210419	0.332888	0.64158	0.563933	0.690484
644	AMZ2	-0.0415336	-0.00975465	-0.0158528	-0.0411943	0.0787084	0.0373585	0.176146	0.141298	-0.0665804	0.375082	-0.0227908	-0.0422133	-0.0372587	-0.0451288	-0.198381	0.115992	-0.024122	0.181539	0.0279033	-0.0474126	-0.0309591	-0.000746632	NA	0.417914	0.530325	0.49485	0.313251	0.418449	0.450561	0.255656
645	ANAPC1	-0.86702	-1.14532	-0.988051	-1.0293	-0.862832	-1.25136	-1.60142	-1.65029	-0.852433	-1.69622	-1.50662	-0.771082	-0.844446	-0.985531	-0.933342	-1.12525	-0.847719	-0.877945	-1.10806	-1.18258	-1.21654	-0.75956	NA	2.27715	2.42584	2.00087	2.43542	1.40688	2.51703	1.46229
646	ANAPC10	-0.44903	-0.264592	-0.457348	-0.396836	-0.312388	-0.670506	-0.548224	-0.588287	-0.752725	-0.708757	-0.387691	-0.28167	-0.574084	-0.491337	-0.407448	-0.386224	-0.301018	-0.323758	-0.36268	-0.166503	-0.298338	-0.616358	essential_DepMap	1.46753	0.99612	1.30452	1.37267	0.698362	1.35056	0.557547
647	ANAPC11	-1.79247	-1.875	-1.70142	-1.6037	-1.91224	-1.58977	-1.33711	-1.63916	-1.54037	-1.35721	-1.317	-1.55588	-1.8164	-2.00514	-1.37006	-1.83734	-2.39624	-1.42824	-2.17772	-1.57227	-1.56649	-1.83634	essential_DepMap	4.92082	2.73013	6.59176	6.11464	3.01772	6.59176	3.57155
648	ANAPC13	-0.594265	-0.769838	-0.12528	-0.193155	-0.538757	-0.325381	-0.432958	-0.0722194	-0.578543	-0.658405	-0.207512	-0.635998	-0.69418	-0.452617	-0.0659192	-0.320391	-0.489795	-0.587719	-0.483796	-1.05588	-0.150493	-0.100067	NA	0.41174	0.309326	0.9914	0.90436	0.978143	1.0202	0.454204
649	ANAPC15	-0.63441	-0.288151	-0.257007	-0.611788	-0.260503	-0.322371	-0.861935	-0.307826	-0.336916	-0.743638	-0.980233	-0.627097	-0.668185	-0.607948	-0.697046	-0.52653	-0.166025	-0.35498	-0.356322	-0.21998	-0.277817	-0.236197	essential_DepMap	0.572157	1.60113	1.28988	1.3031	0.53929	0.391838	1.13322
650	ANAPC16	-0.349041	-0.0926333	-0.209132	-0.265849	-0.0429832	-0.157712	-0.194629	-0.390591	0.0751683	-0.0392268	-0.350032	-0.411447	-0.396107	-0.23957	-0.302178	-0.229521	-0.131607	0.0456406	-0.286462	0.101195	-0.23454	-0.183724	NA	0.294709	0.354666	0.647817	0.515999	0.224426	0.334588	0.337502
651	ANAPC2	-1.12933	-1.00778	-1.19623	-1.67621	-1.34438	-1.28558	-1.64082	-1.01434	-1.55683	-1.72758	-1.55406	-1.49467	-0.902626	-0.990701	-1.67084	-1.68159	-1.08248	-1.60628	-1.33993	-0.675622	-1.54655	-0.845904	NA	2.37558	2.58236	2.25259	3.07804	1.79871	1.93306	1.55343
652	ANAPC4	-0.847593	-0.76813	-0.686045	-0.874167	-0.521414	-1.04916	-0.649298	-1.01849	-1.07982	-0.642707	-0.655888	-1.03284	-0.71402	-0.795924	-0.976788	-0.771546	-0.617714	-0.425114	-0.835141	-0.70112	-0.544668	-0.827421	essential_DepMap	2.05513	1.02731	3.20343	1.83181	0.935374	2.72145	1.0951
653	ANAPC5	-0.962579	-1.03515	-1.24712	-1.19956	-1.30683	-1.28437	-0.81456	-1.46224	-1.1065	-1.01611	-0.613011	-1.21865	-0.958088	-0.710997	-1.14777	-1.25135	-1.81402	-0.799629	-0.997762	-1.07254	-1.5478	-0.946448	essential_DepMap	3.00326	1.17246	2.33819	2.19363	2.29443	1.81664	1.55457
654	ANAPC7	0.0500315	0.255107	0.182528	0.314659	0.146585	0.102143	0.126528	0.266593	-0.0623065	0.0411602	0.211896	0.0698849	0.2877	-0.20749	0.221279	0.408039	0.246593	0.0465779	0.28113	0.229085	0.0883396	0.276716	NA	0.441487	0.679968	0.725842	1.37394	0.51622	1.46676	0.716767
655	ANG	-0.141672	-0.149837	-0.0900229	-0.265093	-0.165478	-0.342145	-0.0647152	-0.154904	-0.529386	-0.253242	0.123812	-0.0702696	-0.254793	-0.099952	-0.15586	-0.374326	-0.303589	-0.0273677	-0.190086	-0.109588	-0.08901	-0.0910357	NA	0.482823	0.235835	0.282329	0.631823	0.24884	0.191472	0.0629538
656	ANGEL1	-0.133755	-0.164671	0.0328346	-0.114678	-0.0886083	-0.22377	0.131801	-0.224257	-0.223282	0.265303	-0.00170144	-0.124925	-0.215082	-0.0612598	-0.12602	-0.103336	-0.0175207	-0.159696	-0.0799888	-0.249353	-0.0964806	0.16215	NA	0.528122	0.483676	0.41005	0.356705	0.556972	0.322461	0.258628
657	ANGEL2	-0.363171	-0.101452	-0.0239176	0.00640542	-0.210665	-0.319503	-0.589338	-0.138121	-0.500885	-0.645735	-0.532942	-0.423121	-0.0625866	-0.603806	0.0730468	-0.060236	-0.0434004	-0.377929	0.0642534	-0.267157	0.0918224	-0.139658	NA	0.48052	0.807309	0.464706	0.173045	0.451463	0.263281	0.235241
658	ANGPT1	-0.0313857	-0.029128	-0.149212	-0.016503	-0.0348402	-0.0908851	0.322358	-0.153483	-0.0282872	0.426804	0.217912	0.0908199	-0.210649	0.0256715	-0.123827	0.090821	0.087945	-0.157626	0.00947992	-0.067736	-0.325757	0.0273332	NA	0.448662	0.708476	0.452225	0.408084	0.125823	0.437838	0.225582
659	ANGPT2	0.0576175	0.152619	0.106883	0.0642203	-0.00094356	0.209986	-0.101704	-0.0353899	0.455363	0.186575	-0.389984	-0.0680747	0.207508	0.0334196	0.0706153	0.0578254	-0.0799454	0.0780582	0.292384	0.012854	-0.0716554	0.285421	NA	0.54971	0.179418	0.449772	0.622002	0.263647	0.544615	0.304094
660	ANGPT4	0.0856895	0.00784026	0.110559	-0.0470934	-0.0159778	-0.121053	0.287848	-0.215669	-0.0264379	0.107903	0.467794	0.0626443	0.0803744	0.11405	-0.131968	0.0377808	-0.185792	0.153837	0.0733392	-0.0576587	0.263499	-0.0423808	NA	0.294038	0.610638	0.632644	0.265272	0.452305	0.258738	0.411754
661	ANGPTL1	0.0397325	0.297801	0.148172	0.156554	0.189512	0.351722	0.236134	0.0475238	0.655919	-0.0899508	0.562218	0.0280749	-0.065911	0.157034	0.0906036	0.222505	0.30339	0.0756338	0.229805	0.365797	0.234869	0.0614751	NA	0.49852	0.398114	0.508638	0.825897	0.966844	1.28767	0.531195
662	ANGPTL2	0.0459562	0.244767	-0.058356	0.00318049	0.183982	0.372053	-0.742479	0.408973	0.335132	-0.442045	-1.04291	0.0644044	-0.032334	0.105798	0.00337013	0.00299085	0.213835	0.154128	0.10082	0.388714	-0.338142	0.22143	NA	0.661892	0.60635	0.158641	0.304348	0.36204	0.735988	0.364496
663	ANGPTL3	0.126835	-0.0424068	-0.0174581	0.041623	0.116418	-0.054351	0.0249969	-0.213754	0.105052	0.0278032	0.0221906	0.00362629	0.122193	0.254684	0.0861876	-0.00294153	0.102136	0.1307	0.135359	-0.220173	0.0407966	-0.0757128	NA	0.24829	0.258092	0.485452	0.50805	0.332374	0.432367	0.219989
664	ANGPTL4	-0.284994	-0.332545	0.117517	-0.358507	-0.0653719	-0.354173	-0.218126	-0.437914	-0.270432	0.0570754	-0.493328	-0.352709	-0.222384	-0.279889	-0.347316	-0.369698	-0.0754608	-0.055283	-0.549859	-0.115232	0.186308	0.0487268	NA	0.261846	0.199544	0.486782	0.618344	0.193467	0.466126	0.280242
665	ANGPTL5	0.241132	0.45071	0.0399333	0.192351	0.351988	0.0638079	-0.153915	0.33905	-0.211434	-0.0173669	-0.290464	0.317531	0.179756	0.226109	0.268723	0.11598	0.223481	0.480496	0.420725	0.480695	0.143752	-0.0638849	NA	0.33792	0.399414	1.06399	0.66773	1.01095	2.30855	0.358833
666	ANGPTL6	-0.373496	-0.438585	-1.02791	-0.584929	-0.509498	-0.349208	-0.797535	-0.0475364	-0.650879	-0.362749	-1.23232	-0.311399	-0.348589	-0.460499	-0.839658	-0.3302	-0.354086	-0.66491	-0.690111	-0.18706	-0.337046	-1.71877	NA	0.611757	1.26831	0.838632	1.34178	0.863267	0.5576	0.737574
667	ANGPTL7	0.10567	0.0383917	0.235578	0.18075	0.260272	0.733804	0.136679	0.74655	0.721058	0.383689	-0.110331	0.0517634	0.226757	0.0384888	0.353652	0.00784794	0.156218	0.364326	0.00288766	0.0738957	0.188391	0.282765	NA	1.93507	0.66354	0.490797	0.416618	0.833629	0.230759	0.798412
668	ANGPTL8	-0.0733681	-0.127518	0.169381	-0.100921	0.128444	-0.165049	-0.172197	-0.262716	-0.0673814	-0.28045	-0.0639445	-0.106554	-0.21538	0.10183	-0.0164954	-0.185346	0.181321	0.0755671	-0.121871	-0.133165	-0.0933033	0.432065	NA	0.15426	0.379479	0.278189	0.197168	0.548075	0.400101	1.58343
669	ANHX	-0.084773	0.155174	-0.128588	0.0542297	-0.20156	-0.145913	-0.270882	-0.192131	-0.0996939	-0.186586	-0.355179	-0.349268	-0.112413	0.207363	0.0629275	0.045532	-0.117449	-0.285671	0.0941686	0.216178	-0.0412018	-0.215974	NA	0.123901	0.259211	0.346787	0.538697	0.39737	0.605242	0.175006
670	ANK1	-0.028265	-0.0487391	0.183494	-0.048309	0.0766622	-0.0379525	-0.0167114	0.0431092	-0.119014	-0.0411192	0.00769637	0.070845	-0.0769658	-0.0786742	-0.146205	0.0495871	0.0278896	0.125435	0.0689746	-0.166453	0.0586337	0.308354	NA	0.212518	0.294316	0.21254	0.23585	0.339808	0.371918	0.518092
671	ANK2	0.031072	0.0375171	-0.0556073	0.0132957	-0.125175	0.122529	-0.107437	0.357144	-0.112086	-0.462746	0.247872	-0.0584812	0.116223	0.0354741	-0.102285	0.128876	-0.00871792	-0.241631	0.0755075	-0.000473346	-0.0973918	-0.0138229	NA	0.511784	0.401698	0.49485	0.28523	0.165681	0.393877	0.334602
672	ANK3	-0.13462	-0.252538	-0.0457885	-0.373106	0.141042	-0.125307	-0.0680288	0.143786	-0.3944	0.0699164	-0.205974	-0.358016	-0.0464216	0.000576073	-0.504082	-0.242131	0.140081	0.142002	-0.205914	-0.299161	-0.0857408	-0.0058362	NA	0.312806	0.376766	0.272459	0.753748	0.162705	0.501469	0.183298
673	ANKAR	-0.0166267	0.0913069	0.257517	0.247566	0.127062	-0.110908	0.19978	-0.527858	0.306041	0.205269	0.194292	0.0167607	-0.120001	0.0533606	0.105383	0.389748	0.229496	0.0246288	0.240926	-0.0583123	0.296536	0.218498	NA	0.429702	0.704818	0.444906	2.00368	0.592533	0.404537	0.818727
674	ANKDD1A	-0.0188176	-0.478537	-0.13059	-0.0821157	-0.31781	0.104112	0.10498	-0.222916	0.431139	0.219378	-0.00941937	-0.0860388	0.0530539	-0.0234679	-0.317524	0.153293	-0.40147	-0.23415	-0.558895	-0.398178	-0.0870493	-0.17413	NA	0.678236	0.683233	0.374688	0.402947	0.526834	0.602834	0.227557
675	ANKDD1B	-0.0292005	-0.108373	0.141461	-0.107453	0.0249213	0.0773593	0.148037	0.16829	-0.0135713	-0.265756	0.56183	-0.0827666	0.0516094	-0.0564444	0.0381536	-0.25306	-0.0534933	0.103336	-0.200626	-0.0161195	0.336905	-0.0539824	NA	0.364617	0.341944	0.332547	0.272276	0.454068	0.16417	1.3098
676	ANKEF1	-0.0108919	-0.0400358	-0.0663212	-0.112395	-0.0130634	-0.135873	-0.170187	0.0255768	-0.297324	-0.302567	-0.0378061	-0.02468	-0.00401889	-0.00397678	-0.16847	-0.0563191	-0.358002	0.331875	0.100303	-0.180374	-0.0490296	-0.0836128	NA	0.293383	0.225107	0.360514	0.297975	0.415835	0.333693	0.35756
677	ANKFN1	0.151503	0.0144301	0.106198	-0.0701612	0.023407	0.291372	0.0283334	0.254438	0.328307	-0.0759073	0.132574	-0.0404152	0.178431	0.316494	-0.0362233	-0.104099	0.449309	-0.402495	-0.0669654	0.0958255	-0.0378166	0.250212	NA	0.885139	0.457349	0.49485	0.27187	0.58263	0.271362	0.581724
678	ANKFY1	-0.360534	-0.424131	-0.0320814	-0.393782	-0.255196	-0.09743	-0.138744	0.158073	-0.352933	-0.322841	0.045353	-0.137305	-0.406418	-0.537879	-0.0953564	-0.692208	-0.405812	-0.104579	-0.581012	-0.26725	-0.264747	0.200584	NA	0.393355	0.359091	0.565431	0.547105	0.396569	0.818408	0.340231
679	ANKH	0.22224	0.307028	0.299215	0.369569	0.219267	0.321641	0.158351	0.37079	0.272493	0.0347864	0.281915	0.179794	0.229779	0.257148	0.29417	0.444968	0.157609	0.280924	0.232134	0.381921	0.453906	0.144523	NA	0.988942	0.443263	1.09313	1.89992	0.704609	1.42795	0.639184
680	ANKHD1	-0.216191	0.0232406	-0.256133	-0.130502	-0.197038	-0.173916	-0.181193	-0.0401749	-0.307657	0.00132418	-0.363711	-0.180582	-0.122909	-0.345083	-0.030296	-0.230708	-0.178705	-0.215371	0.0113684	0.0351127	-0.606707	0.0944407	NA	0.208422	0.464434	0.399027	0.380834	0.190077	0.25321	0.317088
681	ANKHD1-EIF4EBP3	-0.137709	-0.0886291	0.0592104	-0.00736304	0.113412	-0.144837	-0.126067	-0.149425	-0.140249	-0.121851	-0.130283	-0.298284	-0.106057	-0.00878478	-0.122194	0.107468	0.015404	0.211419	-0.14921	-0.0280483	0.121382	-0.00296132	NA	0.32949	0.20117	0.201349	0.343498	0.733286	0.251789	0.279981
682	ANKIB1	-0.0298571	-0.0912175	-0.07546	-0.0823167	-0.0617609	-0.0759849	-0.0719908	-0.192359	0.0403896	-0.325658	0.181677	-0.0875736	0.0729462	-0.0749439	-0.151318	-0.0133151	-0.132712	0.00919061	-0.122674	-0.0597606	0.0210745	-0.171994	NA	0.177554	0.213472	0.303644	0.373911	0.248363	0.0798219	0.14869
683	ANKK1	-0.0441345	0.231699	0.339933	0.0819275	0.0644955	0.0389533	0.0979994	-0.0972819	0.175188	-0.219926	0.415924	-0.349588	0.182758	0.0344267	0.180009	-0.0161538	-0.0141191	0.14311	0.412591	0.0508075	0.31571	0.364155	NA	0.318727	0.493814	0.296709	0.646266	0.246915	0.822436	1.25698
684	ANKLE1	-0.244964	-0.0527786	-0.773438	-0.211116	-0.209834	-0.582979	-0.540933	-0.703296	-0.462662	-0.968014	-0.113853	-0.096763	-0.598483	-0.039645	-0.114202	-0.30803	-0.350811	-0.068857	-0.0177844	-0.0877729	-0.770405	-0.776471	NA	0.800415	0.446929	0.364516	0.338736	0.310128	0.252452	1.49658
685	ANKLE2	-1.30054	-0.84384	-1.16205	-1.12936	-0.884523	-1.22956	-1.25046	-1.11185	-1.34727	-1.33667	-1.16425	-1.22445	-1.26409	-1.41309	-1.44437	-0.81435	-0.785084	-0.983962	-0.850599	-0.837082	-1.27711	-1.04699	essential_DepMap	1.5919	1.85391	3.065	1.56318	1.68755	1.54231	1.64694
686	ANKMY1	-0.0157506	-0.0227872	-0.067421	0.0830787	-0.0951186	-0.177864	0.11221	0.195924	-0.551652	-0.0865491	0.31097	0.134177	-0.0447186	-0.13671	0.110354	0.0558039	-0.0770682	-0.113169	-0.0334212	-0.0121533	-0.186501	0.0516591	NA	0.278614	0.563233	0.423659	0.49485	0.192698	0.284515	0.177953
687	ANKMY2	0.125725	0.0807298	0.123344	-0.0537314	-0.0857336	-0.284967	-0.37422	-0.184234	-0.385701	-0.249686	-0.498755	0.0727918	0.125241	0.179143	0.042671	-0.150134	-0.167702	-0.0037656	0.091182	0.0702776	0.25114	-0.00445134	NA	0.318135	0.494199	0.575118	0.256706	0.28653	0.360693	0.620459
688	ANKRA2	0.0402741	-0.200497	-0.0387984	-0.305648	-0.0252478	-0.765268	-0.0555373	-0.518088	-1.01245	-0.402946	0.291871	-0.0370249	0.0989878	0.0588595	-0.275956	-0.335339	-0.00657808	-0.0439175	-0.22305	-0.177943	0.0426294	-0.120226	NA	0.77904	0.261465	0.305395	0.607532	0.64594	0.364637	0.268867
689	ANKRD1	0.12138	0.0531588	0.152293	-0.025279	0.0597612	0.290967	0.471871	0.653785	-0.0718508	0.630487	0.313256	0.0991472	0.181923	0.0830706	0.039578	-0.090136	-0.0861442	0.205667	-0.015735	0.122053	0.215398	0.0891885	NA	0.531275	0.925041	0.675718	0.217517	0.342375	0.819732	0.328119
690	ANKRD10	0.0215282	0.222586	0.0796349	0.113438	0.0986075	-0.235592	0.152246	-0.487392	0.0162088	0.1588	0.145693	-0.28785	0.42963	-0.0771951	0.0825344	0.144342	0.11285	0.0843651	0.300924	0.144247	0.144436	0.0148343	NA	0.23117	0.34349	0.431798	0.428	0.415166	0.701944	0.353979
691	ANKRD11	-0.134032	-0.0619861	-0.32555	-0.1755	-0.180589	-0.364005	0.117673	-0.308124	-0.419886	0.378273	-0.142927	-0.228812	-0.130543	-0.04274	-0.114008	-0.236992	-0.137014	-0.224164	-0.0330883	-0.0908839	-0.414112	-0.236988	NA	0.833585	0.32279	0.367543	0.420199	0.365553	0.131162	0.506681
692	ANKRD12	-0.0178074	-0.282522	0.213898	-0.0835367	-0.180719	0.0104521	0.254256	-0.0225542	0.0434584	0.287825	0.220687	-0.109093	0.0240504	0.0316202	-0.114935	-0.0521381	0.0141414	-0.37558	-0.371249	-0.193795	0.418435	0.00935987	NA	0.273354	0.64237	0.408935	0.280023	0.438565	0.59776	0.3798
693	ANKRD13A	0.0463282	-0.00390363	0.251246	-0.0824867	-0.306545	0.366386	0.0854859	0.384423	0.348349	-0.0749812	0.245953	0.230771	-0.271359	0.179573	-0.00551139	-0.159462	-0.377041	-0.236049	0.0105081	-0.0183154	0.294704	0.207788	NA	0.647702	0.320822	0.595166	0.162181	0.776452	0.69725	1.61756
694	ANKRD13B	-0.0429344	-0.175811	-0.132842	-0.0832742	-0.157591	-0.245284	-0.0626633	-0.13081	-0.359758	-0.115676	-0.00965011	-0.257294	0.0251371	0.103354	-0.0314724	-0.135076	-0.289717	-0.0254656	0.106297	-0.457918	-0.000120098	-0.265563	NA	0.352744	0.263914	0.295849	0.308675	0.292153	0.53166	0.32885
695	ANKRD13C	-0.025282	-0.127127	0.0432536	0.0207451	-0.164817	-0.104564	-0.371061	-0.159321	-0.0498076	-0.579996	-0.162126	-0.0784569	0.148573	-0.145962	-0.0533129	0.0948031	-0.471953	0.142319	-0.35314	0.0988858	-0.051501	0.138008	NA	0.177845	0.615261	0.278189	0.415935	0.270895	0.320168	0.253849
696	ANKRD13D	-0.0973775	-0.0698922	-0.0869713	0.0575278	-0.0725792	0.364559	-0.333294	0.486304	0.242814	0.145873	-0.812461	-0.183522	-0.149308	0.0406977	-0.0341089	0.149165	-0.299478	0.15432	0.0143271	-0.154111	-0.164523	-0.00941949	NA	0.628338	0.340953	0.160522	0.497346	0.195912	0.115148	0.241648
697	ANKRD16	0.0429668	-0.0548426	0.185497	-0.0412259	-0.0531642	-0.113601	-0.0356588	-0.400384	0.173182	-0.069665	-0.00165256	-0.00837666	-0.00556283	0.14284	0.0576354	-0.140087	0.0763247	-0.182653	-0.0320643	-0.0776209	0.171071	0.199923	NA	0.229063	0.117524	0.431798	0.196512	0.351099	0.218313	0.858743
698	ANKRD17	-0.378409	-0.0908281	-0.220592	-0.00185382	-0.205423	-0.177863	-0.63839	-0.10083	-0.254896	-0.752853	-0.523928	-0.403633	-0.232423	-0.499172	-0.0331893	0.0294817	-0.275898	-0.134947	-0.00582952	-0.175827	-0.210782	-0.230403	NA	0.143501	1.22858	0.869666	0.164002	0.327307	0.326196	0.353866
699	ANKRD18A	-0.0598453	-0.124587	-0.0226327	-0.0477186	-0.17174	-0.12701	0.271135	-0.49449	0.240471	-0.0184176	0.560687	-0.210344	-0.00565957	0.0364678	-0.0882097	-0.00722749	-0.196539	-0.14694	-0.126924	-0.12225	-0.321261	0.275996	NA	0.358814	0.767431	0.188425	0.322859	0.125643	0.324813	0.488036
700	ANKRD18B	0.05174	-0.146029	-0.035816	0.0381368	-0.0575943	0.171402	0.0226379	0.0179939	0.32481	-0.248845	0.294121	0.270834	-0.00758718	-0.108027	0.234378	-0.158104	-0.162212	0.0470236	-0.367213	0.0751541	-0.202025	0.130393	NA	0.331172	0.415121	0.422508	0.350284	0.213391	0.402244	0.485213
701	ANKRD2	-0.0868984	-0.0521075	0.176342	-0.0564942	-0.0859488	-0.337041	-0.0768813	-0.315416	-0.358665	0.176746	-0.330509	-0.246114	0.194023	-0.208605	-0.130889	0.0179007	0.0458934	-0.217791	0.045928	-0.150143	0.408666	-0.0559811	NA	0.432503	0.217671	0.327902	0.343969	0.246635	0.274705	0.631595
702	ANKRD20A1	-1.22181	-1.07312	-1.45067	-1.00296	-0.812318	-1.23134	-1.47315	-0.95524	-1.50744	-1.66236	-1.28393	-1.15105	-1.05974	-1.45465	-1.06487	-0.94106	-0.609848	-1.01479	-1.10981	-1.03643	-1.01227	-1.88907	NA	2.15876	2.21496	3.38828	2.61105	1.22845	3.05868	1.84075
703	ANKRD20A2	-0.419865	-0.155513	-0.260329	-0.371114	-0.320854	-0.169763	-0.352235	-0.0521036	-0.287423	-0.421289	-0.283182	-0.261561	-0.581453	-0.416582	-0.236212	-0.506016	-0.0789406	-0.562766	-0.165073	-0.145953	-0.203445	-0.317212	NA	0.846771	0.579566	1.08725	1.60992	0.850242	0.917479	0.788945
704	ANKRD20A3	-0.825287	-1.02277	-0.817238	-0.762621	-0.716192	-1.55406	-1.08678	-1.16894	-1.93917	-0.637548	-1.53602	-0.828686	-0.776857	-0.870316	-0.865463	-0.659778	-0.89632	-0.536064	-0.947402	-1.09814	-0.864238	-0.770238	NA	3.01541	1.3536	2.46725	1.8263	1.2371	3.0525	1.60185
705	ANKRD20A4	-0.45161	-0.517387	-0.540304	-0.461714	-0.366619	-0.798851	-0.496996	-0.823191	-0.77451	-0.514336	-0.479656	-0.222018	-0.629693	-0.50312	-0.438718	-0.484711	-0.517946	-0.215292	-0.50343	-0.531344	-0.265979	-0.814629	NA	1.87377	0.806667	1.767	2.1339	0.669962	1.5496	0.841977
706	ANKRD22	-0.0953043	-0.0454841	-0.334465	-0.121273	-0.0227639	-0.0671625	-0.306775	-0.0740816	-0.0602434	-0.0383274	-0.575223	-0.000299357	-0.296798	0.0111844	-0.257798	0.015252	0.05077	-0.0962978	-0.0989843	0.00801614	-0.335918	-0.333012	NA	0.287809	0.573074	0.187087	0.401729	0.32263	0.224193	0.66968
707	ANKRD23	-0.210258	-0.131403	-0.127406	-0.235318	-0.148975	-0.267673	-0.11248	-0.264241	-0.271105	-0.13747	-0.0874893	-0.37407	-0.0614336	-0.195271	-0.311058	-0.159578	-0.240541	-0.0574084	-0.19736	-0.0654457	-0.257364	0.00255156	NA	0.349008	0.549843	0.341035	0.862396	0.36417	0.518823	0.305821
708	ANKRD24	-0.184973	-0.363259	-0.133014	-0.194805	-0.0691017	-0.190903	-0.222308	-0.28753	-0.0942771	-0.00660069	-0.438015	-0.167814	-0.178862	-0.208242	-0.24738	-0.142231	0.0502484	-0.188452	-0.540395	-0.186123	-0.128045	-0.137983	NA	0.425992	0.357002	0.372634	0.462798	0.305136	0.540598	0.175077
709	ANKRD26	0.102388	0.174822	-0.0803966	0.0227021	0.00836888	-0.0606835	0.108974	-0.151312	0.0299454	0.0529117	0.165036	0.163132	0.0745631	0.0694678	0.00210074	0.0433034	-0.0351639	0.0519017	0.259517	0.0901267	-0.0260246	-0.134769	NA	0.341388	0.392652	0.58838	0.386317	0.19644	0.872053	0.192161
710	ANKRD27	0.124842	0.286524	0.077091	0.0286166	0.0414603	0.230967	0.0199367	0.0834257	0.378509	0.478737	-0.438863	0.114382	0.164748	0.0953978	-0.0291064	0.0863396	0.101234	-0.0183131	0.373702	0.199347	0.0976393	0.0565427	NA	0.817557	0.295789	0.835647	0.514818	0.240585	1.2107	0.393904
711	ANKRD28	-0.444774	-0.401425	-0.675942	-0.392549	-0.551825	-0.814766	-0.453162	-0.614717	-1.01482	0.164263	-1.07059	-0.326307	-0.524817	-0.4832	-0.445887	-0.339212	-0.5006	-0.603049	-0.428568	-0.374282	-0.641431	-0.710453	NA	0.752419	0.41656	0.931814	1.10341	0.896811	0.794311	1.11198
712	ANKRD30A	0.0577309	-0.105191	0.00152554	0.104855	0.0749851	0.333207	0.109177	0.284492	0.381922	-0.00543099	0.223785	-0.199797	0.194706	0.178284	0.0178077	0.191902	0.132332	0.0176387	-0.0578231	-0.15256	-0.0398327	0.0428838	Nonessential_DepMap	0.749619	0.646113	0.450997	0.562769	0.39321	0.289773	0.164696
713	ANKRD30B	-0.00465402	0.0350202	0.00894963	0.126748	-0.142931	-0.235238	0.180857	-0.391635	-0.078842	0.0798702	0.281844	-0.0522015	-0.0344445	0.0726839	0.0999423	0.153555	-0.113177	-0.172685	0.0845303	-0.01449	0.1026	-0.0847006	NA	0.496523	0.628572	0.286509	0.696577	0.187344	0.371203	0.486769
714	ANKRD31	0.0472887	0.00581684	-0.222447	0.0690862	-0.14315	-0.170179	-0.219001	-0.436435	0.0960759	-0.362298	-0.0757043	-0.0154839	0.0812822	0.0760678	-0.162075	0.300248	-0.249437	-0.0368639	-0.0660445	0.0776781	-0.208719	-0.236175	NA	0.484014	0.49403	0.402305	0.413771	0.217284	0.173329	0.687622
715	ANKRD33	-0.0379041	-0.270256	-0.203414	-0.0794873	0.0388153	-0.0153475	0.204408	-0.119261	0.088566	0.21418	0.194637	-0.0441375	0.166981	-0.236556	-0.125186	-0.033789	-0.0244887	0.102119	-0.281335	-0.259177	-0.397867	-0.0089604	NA	0.497853	0.384255	0.442493	0.2581	0.363893	0.541453	0.308264
716	ANKRD33B	-0.0107375	0.158477	-0.1858	-0.107755	-0.363697	0.165676	0.628134	0.098596	0.232756	0.798292	0.457975	0.155045	-0.0691255	-0.118132	-0.221409	0.00589829	-0.497909	-0.229484	0.334162	-0.0172078	-0.236848	-0.134752	NA	0.539643	1.10421	0.258848	0.459802	0.681989	0.594654	0.390384
717	ANKRD34A	0.0468617	-0.0894423	-0.308634	-0.266204	-0.0730225	-0.233328	-0.0571674	0.31301	-0.779665	0.147764	-0.262099	0.174867	-0.126792	0.0925107	-0.162075	-0.370332	-0.185995	0.0399503	-0.0186811	-0.160203	-0.160377	-0.456891	NA	0.405525	0.135477	0.387216	0.349829	0.981318	0.266875	0.508372
718	ANKRD34B	0.0767861	-0.0972847	-0.0934281	-0.0290355	-0.168051	-0.51549	0.0165867	-0.712905	-0.318075	-0.150444	0.183617	0.013047	0.169665	0.0476469	0.078917	-0.136988	-0.113376	-0.222727	-0.0531567	-0.141413	-0.11863	-0.0682259	NA	0.495366	0.331759	0.531653	0.353802	0.277835	0.241137	0.379536
719	ANKRD34C	0.0853309	-0.115933	-0.216747	0.203176	0.277802	0.353727	0.251823	0.262557	0.444897	-0.125112	0.628759	-0.257341	0.416291	0.0970428	0.176302	0.230049	-0.0311173	0.586721	-0.0708044	-0.161061	0.0813165	-0.514811	NA	0.87136	0.398659	0.368556	0.726004	0.962916	0.284214	0.294722
720	ANKRD35	0.0751833	0.054789	-0.26983	0.146803	0.202284	-0.0273093	0.135913	-0.183426	0.128807	0.347501	-0.0756741	-0.108015	0.198728	0.134837	0.0914439	0.202162	0.399176	0.00539148	0.104353	0.0052254	-0.209001	-0.33066	NA	0.377947	0.394593	0.37366	0.414613	0.790517	0.355266	0.541498
721	ANKRD36	-0.678297	-0.608351	-0.501127	-0.638509	-0.184124	-0.600927	-0.615393	-0.943017	-0.258837	-0.495432	-0.735353	-0.810552	-0.638347	-0.585993	-0.816297	-0.460721	-0.223866	-0.144383	-1.118	-0.0987056	-0.535687	-0.466566	NA	0.646008	0.654048	1.98716	1.02954	0.586801	0.820207	0.874519
722	ANKRD36B	-0.0488643	-0.287639	-0.0962865	-0.00799992	-0.0230141	-0.226582	0.0156187	-0.244782	-0.208382	-0.25016	0.281398	-0.102191	-0.00249284	-0.0419087	0.028374	-0.0443739	-0.0966468	0.0506187	-0.207453	-0.367825	-0.168398	-0.0241754	NA	0.337431	0.27536	0.17134	0.845911	0.36217	0.581508	0.346021
723	ANKRD37	0.168189	0.175737	0.175166	0.1322	0.149693	0.288679	0.0150163	0.12083	0.456528	0.0197398	0.0102927	0.101007	0.172832	0.230728	-0.0208745	0.285275	0.0705498	0.228836	-0.0584053	0.409879	-0.0503773	0.400709	NA	0.517913	0.250824	0.744727	0.51783	0.376394	0.509259	0.785689
724	ANKRD39	-0.154554	-0.455069	-0.275246	-0.204764	-0.171841	0.366982	0.0356691	0.151113	0.582851	-0.433367	0.504705	-0.0995446	-0.195945	-0.168172	0.0528976	-0.462426	-0.378047	0.034364	-0.121035	-0.789103	-0.330848	-0.219643	NA	0.892402	0.607579	0.237321	0.403057	0.772945	0.504071	0.572977
725	ANKRD40	0.00444696	0.0634399	0.00960634	-0.221273	-0.289315	-0.186664	-0.181814	-0.0292874	-0.344041	-0.55805	0.194421	-0.00504107	0.0475938	-0.0292119	-0.126467	-0.31608	-0.221117	-0.357513	0.126546	0.000333917	0.11427	-0.0950575	NA	0.261703	0.405094	0.294136	0.650442	0.292553	0.366496	0.245071
726	ANKRD42	0.0484286	0.0793292	0.189968	0.0635219	-0.130493	0.0791855	0.240818	0.179986	-0.0216148	0.204911	0.276726	0.0238812	0.0088992	0.112505	0.00164424	0.1254	-0.0829189	-0.178067	0.00601697	0.152641	0.187196	0.192741	NA	0.557108	0.497894	0.44855	0.501407	0.136451	0.428734	0.772289
727	ANKRD44	-0.255645	-0.200501	0.0409911	-0.189881	-0.242779	0.0378019	-0.306174	-0.0211449	0.0967488	-0.38496	-0.227387	-0.620977	-0.0527277	-0.0932298	-0.234365	-0.145397	-0.387403	-0.0981557	-0.0986591	-0.302343	0.0964018	-0.0144196	NA	0.378164	0.393103	0.255707	0.418431	0.351523	0.356227	0.257589
728	ANKRD45	0.0130144	0.0908368	-0.00100089	-0.0317557	0.0622383	-0.260309	-0.0479944	-0.378643	-0.141975	-0.0156431	-0.0803457	-0.0303617	0.00818222	0.0612228	-0.0275456	-0.0359657	0.0644892	0.0599874	0.0279383	0.153735	0.0690822	-0.071084	NA	0.380526	0.306423	0.277366	0.197722	0.483491	0.418107	0.113975
729	ANKRD46	-0.0987583	0.142173	-0.57	0.0261666	-0.125181	0.0436371	-0.154941	0.0436596	0.0436146	-0.0506218	-0.25926	0.142124	-0.306174	-0.132225	-0.0129388	0.0652721	-0.040349	-0.210014	0.0827467	0.201599	-0.400604	-0.739397	NA	0.176118	0.166591	0.293282	0.264501	0.121757	0.641818	0.70506
730	ANKRD49	-1.18366	-1.36069	-1.42825	-1.12163	-1.27668	-1.07064	-1.31782	-1.25664	-0.884636	-1.68058	-0.955074	-1.0061	-1.2407	-1.30418	-0.939421	-1.30383	-1.12541	-1.42794	-1.53773	-1.18365	-1.013	-1.84349	NA	1.98903	2.13066	3.03574	2.93528	3.00867	3.77812	2.44737
731	ANKRD50	0.153871	0.0872342	0.248938	0.0217504	-0.00162588	0.328594	0.312974	0.241814	0.415374	-0.00551348	0.631461	-0.0568622	0.213591	0.304886	0.169115	-0.125614	-0.0673299	0.0640781	0.170037	0.00443101	0.0514592	0.446417	NA	0.789633	0.874553	0.505845	0.377719	0.525733	0.455039	0.882017
732	ANKRD52	-0.146753	-0.363781	-0.121726	-0.219241	-0.386939	-0.0176191	0.125923	-0.0747627	0.0395244	-0.350461	0.602306	-0.1658	-0.134989	-0.139469	-0.418413	-0.0200695	-0.260267	-0.513611	-0.341061	-0.386502	-0.0613822	-0.182071	NA	0.4212	0.325246	0.546682	0.535712	0.842428	0.508218	0.33426
733	ANKRD53	-0.181491	-0.246342	-0.0582558	-0.101142	0.203925	0.0242686	-0.379306	-0.196884	0.245421	-0.780885	0.022274	-0.0836026	-0.41647	-0.0443992	-0.0735164	-0.128768	0.391228	0.0166222	-0.378348	-0.114336	-0.591564	0.475052	NA	0.258136	0.371153	0.380907	0.260436	1.10483	0.523067	0.606662
734	ANKRD54	-0.0789591	-0.0585048	-0.100698	0.078449	-0.188031	-0.0854164	-0.0115597	-0.283803	0.11297	-0.174102	0.150983	0.0241012	-0.0716031	-0.189376	0.0173965	0.139501	-0.0781222	-0.297939	-0.221015	0.104005	-0.080634	-0.120763	NA	0.308812	0.49236	0.197911	0.775299	0.296756	0.452502	0.140207
735	ANKRD55	-0.111933	0.0638254	0.080393	0.247946	0.181286	0.0674963	0.486672	-0.306576	0.441568	0.698926	0.274418	-0.219305	0.0610453	-0.177539	0.383736	0.112156	0.0212866	0.341286	0.0614416	0.0662091	-0.00749409	0.16828	NA	0.695962	0.980016	0.250264	0.747741	0.621442	0.364335	0.492097
736	ANKRD6	0.0262345	0.161407	0.0920006	0.158685	0.103309	0.173213	-0.047491	0.296624	0.0498028	0.0232964	-0.118278	0.0562771	0.0196902	0.00273601	0.145616	0.171754	0.214245	-0.00762597	0.16845	0.154365	0.088444	0.0955573	NA	0.501042	0.814033	0.518557	0.706803	0.338064	0.696752	0.198089
737	ANKRD60	-0.0635989	-0.0513572	-0.0809288	-0.0151224	-0.184351	0.138668	-0.239254	-0.102722	0.380059	-0.596526	0.118018	-0.32188	0.00577354	0.125309	0.0159424	-0.0461871	-0.0772288	-0.291474	0.00998352	-0.112698	0.113142	-0.275	NA	0.610625	0.434814	0.228413	0.353861	0.266807	0.139225	0.187645
738	ANKRD61	0.161126	0.282121	-0.0444539	0.190935	0.148436	0.24884	0.0643696	-0.118611	0.616291	-0.0468849	0.175624	0.210776	0.24215	0.030452	0.313378	0.0684931	0.246167	0.0507061	0.248403	0.315839	-0.0290197	-0.059888	NA	0.796536	0.18297	0.764472	0.879209	0.557312	1.09881	0.408563
739	ANKRD62	0.100062	0.0229984	0.0889369	0.0719429	0.0109931	-0.123361	0.283264	-0.0478197	-0.198902	0.15557	0.410957	0.0973671	0.135042	0.0677758	0.0898051	0.0540807	-0.0230212	0.0450074	-0.00492514	0.0509219	0.0292203	0.148654	NA	0.198202	1.1303	0.590067	0.646132	0.472538	0.190696	0.272097
740	ANKRD63	-0.275657	-0.261201	-0.53859	-0.320645	-0.246956	-0.213579	-0.491478	-0.505486	0.0783285	-0.739101	-0.243856	-0.15982	-0.278774	-0.388376	-0.33256	-0.308731	-0.140797	-0.353114	-0.419398	-0.103004	-0.926584	-0.150596	NA	0.258478	0.921415	0.548214	0.690359	0.538194	0.671784	0.744635
741	ANKRD65	0.0148116	-0.0573597	0.08299	0.0131782	-0.0305259	-0.000480253	-0.0804488	-0.559551	0.558591	0.116634	-0.277532	-0.202397	-0.177371	0.424202	0.0986848	-0.0723285	-0.284973	0.223921	-0.0830188	-0.0317006	-0.086725	0.252705	NA	0.457	0.0755191	0.530178	0.593017	0.420989	0.199912	0.776134
742	ANKRD66	0.0228561	0.040602	-0.0470906	0.0644845	0.0147714	0.114384	-0.197606	-0.00281103	0.231579	0.012555	-0.407767	-0.0266694	0.115991	-0.0207534	0.143381	-0.0144124	0.0852086	-0.0556658	0.0661979	0.0150062	0.00473602	-0.0989172	NA	0.454464	0.256369	0.363512	0.57263	0.449576	0.355011	0.39149
743	ANKRD7	0.187387	0.100877	-0.0513109	0.0202393	0.124336	0.463709	-0.0873079	0.660344	0.267074	-0.00117554	-0.17344	0.0321419	0.19116	0.338859	-0.147588	0.188066	0.179736	0.0689353	-0.0676007	0.269355	0.00428696	-0.106909	NA	0.832848	0.420897	0.677781	0.297932	0.853285	0.360339	0.306255
744	ANKRD9	0.0547202	0.0571865	0.0919873	0.0402246	0.0531844	-0.279644	0.381649	-0.292942	-0.266347	0.501617	0.261681	0.154098	-0.0780373	0.0880995	0.0287614	0.0516878	-0.0531708	0.15954	0.201771	-0.0873982	-0.0706382	0.254613	NA	0.383528	1.02894	0.510042	0.497839	0.282925	0.681487	0.483042
745	ANKS1A	-0.18503	-0.0666685	0.169452	-0.130156	0.114834	-0.0777091	0.332459	-0.323902	0.168484	0.285467	0.379452	-0.0227071	-0.238327	-0.294056	-0.045764	-0.214548	0.208209	0.0214586	-0.113812	-0.0195252	0.313397	0.0255066	NA	0.304076	0.765141	0.383	0.215529	0.356384	0.170304	0.452
746	ANKS1B	0.0620606	0.094196	-0.0492252	0.119002	0.194648	-0.243989	0.012694	-0.190246	-0.297732	-0.15309	0.178478	0.0217877	0.101493	0.0629014	0.0591372	0.178866	0.249706	0.13959	0.237897	-0.0495055	-0.110612	0.0121621	NA	0.38363	0.405105	0.59346	0.581914	0.550776	0.355556	0.250302
747	ANKS3	0.100068	-0.117581	-0.141351	0.00411699	-0.244959	-0.0314532	0.128389	-0.15861	0.0957034	0.244601	0.0121767	0.166453	0.171586	-0.0378335	0.108143	-0.0999086	-0.214166	-0.275753	-0.143649	-0.0915132	0.210943	-0.493645	NA	0.4145	0.569885	0.386158	0.238708	0.481973	0.14846	0.425257
748	ANKS4B	0.0714012	-0.177442	0.0601078	0.0991357	0.198217	0.141162	0.253723	0.281786	0.000538912	0.479912	0.0275335	0.174106	-0.000882631	0.0409797	0.0300427	0.168229	0.010751	0.385684	-0.16159	-0.193295	-0.0416143	0.16183	NA	0.363552	0.514755	0.480172	0.660419	0.975796	0.34259	0.396769
749	ANKS6	0.032436	-0.184535	0.161778	-0.0230638	-0.0163906	-0.236118	-0.069161	0.221816	-0.694052	-0.182453	0.044131	0.0774121	0.0676385	-0.0477425	-0.0506602	0.00453255	0.0443203	-0.0771014	-0.0115985	-0.357472	0.0775726	0.245984	NA	0.515494	0.304159	0.327902	0.356005	0.328401	0.302653	0.50078
750	ANKUB1	-0.0345852	-0.0370279	-0.0351364	0.105943	-0.0847247	0.131976	0.110816	0.26524	-0.0012887	0.105973	0.11566	0.0651312	0.0232618	-0.192148	0.306715	-0.0948281	-0.0819204	-0.087529	-0.161415	0.0873596	0.164461	-0.234733	NA	0.312583	0.467698	0.250264	0.661108	0.350385	0.212295	0.512636
751	ANKZF1	0.0494471	-0.0836258	-0.111488	0.0266444	0.155162	-0.16414	0.24429	-0.0729406	-0.25534	0.380359	0.108221	0.0825926	-0.0629981	0.128747	-0.0814694	0.134758	0.113781	0.196544	-0.216322	0.04907	-0.223058	8.1574e-05	NA	0.31684	0.623358	0.47237	0.392556	0.613403	0.271188	0.358204
752	ANLN	-0.362826	-0.623652	-0.567202	-0.366968	-0.672215	-0.647919	-0.582013	-0.575891	-0.719946	-0.565249	-0.598778	-0.312059	-0.428106	-0.348313	-0.628166	-0.10577	-1.11192	-0.232513	-0.502031	-0.745272	-0.341834	-0.792569	essential_DepMap	0.996296	0.867772	1.06098	0.73403	0.752522	1.11644	0.641636
753	ANO1	0.0240295	-0.193185	0.115329	-0.28368	-0.188622	0.481617	0.270147	0.595695	0.367539	0.318076	0.222218	-0.0227471	-0.0731821	0.168018	-0.0867949	-0.480565	-0.254247	-0.122996	0.197043	-0.583412	0.30287	-0.072213	NA	0.763836	0.570547	0.182435	0.55752	0.513803	0.432221	0.537316
754	ANO10	-0.00834369	0.20328	0.0567709	0.0761336	-0.196891	0.281267	0.0544902	-0.035649	0.598183	-0.21247	0.32145	0.183974	-0.0720736	-0.136931	-0.000441007	0.152708	-0.220231	-0.173551	0.196287	0.210272	-0.0208348	0.134377	NA	0.435174	0.416133	0.211832	0.494892	0.394733	0.854018	0.544713
755	ANO2	0.0933678	0.0558895	-0.417695	0.15774	-0.115747	0.105519	0.32721	-0.00146027	0.212498	0.409387	0.245033	0.0996006	0.162554	0.0179482	0.12418	0.191299	-0.170885	-0.060608	-0.094575	0.206354	-0.639812	-0.195578	NA	0.286677	0.838902	0.718967	0.750961	0.232937	0.538892	0.330813
756	ANO3	0.0417425	-0.101528	-0.165018	-0.0153951	0.00628928	-0.195214	-0.0168921	-0.0581258	-0.332302	-0.0666011	0.0328168	-0.0893678	0.172467	0.0421278	-0.237166	0.206376	0.110084	-0.0975059	-0.218406	0.0153494	-0.318953	-0.0110835	NA	0.391437	0.194968	0.379864	0.543824	0.2851	0.322576	0.246038
757	ANO4	-0.000609654	-0.0147049	0.10382	0.0548119	0.0352538	0.112446	0.0723528	-0.180618	0.405509	-0.309237	0.453943	0.0178674	-0.0330112	0.0133148	0.155205	-0.0455813	0.1211	-0.0505928	-0.165577	0.136167	0.0807108	0.126929	NA	0.478632	0.385788	0.238824	0.716145	0.339391	0.479956	0.360832
758	ANO5	0.0271704	0.0547009	0.102756	0.0693679	0.00604707	-0.0300423	0.0580118	-0.0787531	0.0186685	0.0796056	0.0364181	0.096447	-0.0617769	0.0468412	0.0426114	0.0961244	0.0203262	-0.00823208	0.0078705	0.101531	0.018093	0.187419	NA	0.416858	0.207013	0.568636	0.752186	0.183513	0.384771	0.470108
759	ANO6	-0.010561	-0.25299	-0.160861	-0.130687	0.00353855	-0.208082	0.252139	0.173519	-0.589682	0.458759	0.0455183	-0.0293323	-0.204201	0.20185	-0.258155	-0.00321979	0.176954	-0.169877	-0.110948	-0.395032	-0.213674	-0.108047	NA	0.31842	0.34787	0.245652	0.30103	0.339823	0.353101	0.215782
760	ANO7	0.0616748	0.0273908	0.170597	-0.125516	-0.0505204	-0.155169	-0.158827	-0.0679504	-0.242387	-0.00426051	-0.313394	0.0765921	0.1913	-0.0828672	-0.0450381	-0.205993	-0.0697843	-0.0312564	0.206898	-0.152117	0.0737347	0.267459	NA	0.0765254	0.224816	0.316053	0.406155	0.364692	0.687072	0.454025
761	ANO8	-0.296855	-0.149415	-0.0889602	-0.236369	-0.083526	-0.00392768	0.0693114	0.264391	-0.272247	0.377432	-0.238809	-0.539977	-0.0402637	-0.310324	-0.384301	-0.0884372	-0.0728912	-0.0941608	0.00738158	-0.306211	0.11521	-0.29313	NA	0.216565	0.516567	0.512862	0.393849	0.439567	0.5014	0.205331
762	ANO9	-0.0245905	0.104763	-0.0178151	-0.144619	-0.0166686	0.174321	0.0457877	-0.0961956	0.444837	-0.105973	0.197548	0.0419693	-0.06346	-0.0522808	-0.160001	-0.129237	-0.0684803	0.035143	0.0958753	0.113651	-0.0171661	-0.0184642	NA	0.449274	0.176872	0.183759	0.285214	0.28105	0.666845	0.211941
763	ANOS1	0.158057	-0.219945	0.0113276	-0.0331482	0.188842	-0.380445	0.238717	-0.461764	-0.299126	0.00101366	0.47642	0.299923	0.0869676	0.0872804	-0.0655372	-0.000759282	0.154545	0.223138	-0.309732	-0.130158	0.22051	-0.197854	NA	0.491746	0.564968	0.69037	0.517198	0.639435	0.164474	0.310482
764	ANP32A	-0.153287	0.0348481	-0.120944	0.0448559	-0.142969	0.0534453	-0.228395	-0.33022	0.43711	0.254454	-0.711244	-0.315266	-0.0307788	-0.113816	0.00709246	0.0826193	0.11954	-0.405477	0.0435498	0.0261463	0.0283482	-0.270236	NA	0.418357	0.489301	0.404504	0.418705	0.452035	0.190248	0.480717
765	ANP32B	-0.0634	0.221108	-0.0707793	0.0644015	0.0559346	0.389399	0.468001	0.00835512	0.770443	0.346038	0.589964	-0.0424154	0.0461161	-0.193901	0.225617	-0.0968142	0.319879	-0.20801	0.27729	0.164925	-0.178778	0.0372197	NA	0.793641	1.05058	0.347754	0.330965	0.567812	0.76585	0.301556
766	ANP32C	0.0478851	0.301826	0.286914	0.0542121	0.00395389	-0.0237823	0.372965	-0.340184	0.29262	0.614455	0.131474	0.270254	-0.159884	0.0332853	-0.032563	0.140987	0.0612187	-0.053311	0.146725	0.456927	0.29979	0.274039	NA	0.435245	0.452731	0.396856	0.334428	0.329105	1.52589	0.714938
767	ANP32D	-0.00745637	0.127784	0.116513	0.0559158	-0.0238213	-0.0705658	-0.162419	-0.336939	0.195808	-0.0314205	-0.293418	-0.212998	-0.0413617	0.23199	0.0913188	0.0205128	-0.136786	0.0891432	0.30524	-0.0496728	-0.167792	0.400817	NA	0.34103	0.268786	0.342944	1.00394	0.39559	0.534535	0.823657
768	ANP32E	-0.147839	-0.383339	-0.207205	-0.209256	-0.159662	-0.474638	-0.134713	-0.218684	-0.730592	-0.26283	-0.00659586	-0.258368	0.056705	-0.241853	0.047975	-0.466487	-0.0697686	-0.249555	-0.354028	-0.41265	-0.457478	0.0430681	NA	0.695897	0.473338	0.341989	0.296838	0.36195	0.63045	0.708269
769	ANPEP	-0.127463	0.107534	0.17886	-0.00393215	-0.55537	-0.187647	-0.0956152	-0.182425	-0.19287	-0.155456	-0.0357748	-0.261281	-0.0509086	-0.0702003	0.0173369	-0.0252012	-0.864402	-0.246339	0.0403184	0.17475	0.446403	-0.0886834	NA	0.267747	0.564458	0.273273	0.317151	0.534347	0.445093	0.352194
770	ANTXR1	0.173612	0.262956	0.318798	0.252265	0.253118	0.41668	0.425488	0.26923	0.56413	0.720802	0.130173	0.281988	0.133312	0.105536	0.345958	0.158572	0.0564001	0.449836	0.0531322	0.472779	0.0925691	0.545027	NA	0.908155	0.678349	0.703335	0.914137	1.33276	0.770407	0.66933
771	ANTXR2	0.0454066	-0.0949077	-0.0303902	-0.0546103	0.00544596	-0.0174466	-0.0966385	-0.0493562	0.0144629	0.0110725	-0.204349	-0.146079	0.0818918	0.200407	0.0442681	-0.153489	-0.0298332	0.0407251	-0.14074	-0.0490757	-0.0379811	-0.0227992	NA	0.467838	0.343346	0.756962	0.367882	0.268403	0.401691	0.226605
772	ANTXRL	-0.456483	-0.300693	-0.500172	-0.186242	-0.593561	-0.971385	-0.629449	-1.0515	-0.891268	-0.559902	-0.698996	-0.877157	-0.325483	-0.166809	-0.0700015	-0.302483	-0.594904	-0.592218	-0.327044	-0.274343	-0.523892	-0.476452	Nonessential_DepMap	0.944922	0.842823	0.525784	0.36202	0.934532	0.666081	0.883592
773	ANXA1	0.0580341	0.172381	-0.0524424	0.180346	0.0713235	0.306543	-0.212824	0.700144	-0.0870591	0.0612545	-0.486902	-0.0654576	0.164768	0.0747921	0.354743	0.00594883	0.392718	-0.250071	0.225063	0.1197	0.0834678	-0.188353	NA	0.478768	0.223669	0.627088	0.370287	0.358969	0.514052	0.25613
774	ANXA10	0.291705	0.0963284	0.210761	0.102741	-0.318049	0.57201	0.0938211	0.665504	0.478517	0.376063	-0.18842	0.164819	0.501161	0.209135	0.107398	0.098085	-0.2302	-0.405898	0.186139	0.00651817	0.204808	0.216715	NA	2.04539	0.418466	0.995679	0.862988	0.699035	1.2317	0.719809
775	ANXA11	-0.231357	-0.10171	-0.833791	-0.0760201	-0.288039	-0.602701	-0.335444	-0.438006	-0.767397	-0.0803184	-0.590569	-0.0667678	-0.344103	-0.283199	-0.204227	0.0521871	-0.242731	-0.333348	-0.216888	0.0134689	-0.89729	-0.770292	NA	0.706181	0.48357	0.427128	0.194941	0.479464	0.623004	1.38717
776	ANXA13	0.0158381	-0.0229007	-0.0604503	0.0454578	0.223042	-0.0557076	0.290261	-0.06378	-0.0476351	0.218351	0.362171	-0.012065	-0.0667976	0.126377	-0.119095	0.210011	0.372558	0.0735259	-0.134941	0.08914	-0.386495	0.265594	NA	1.00726	0.625477	0.480172	0.842879	0.935617	0.447788	0.398005
777	ANXA2	0.10865	0.00524708	0.11209	0.235729	-0.0380884	0.193123	-0.147817	0.0353004	0.350945	-0.319883	0.0242485	-0.0800924	0.0889025	0.317139	0.302329	0.16913	-0.132981	0.0568047	-0.0298883	0.0403825	-0.0874921	0.311671	NA	0.431147	0.343926	0.809668	0.899333	0.712512	0.286404	0.40484
778	ANXA2R	0.179731	-0.0266048	-0.0551256	-0.279846	0.0180914	0.316594	0.302045	0.406439	0.226749	0.756189	-0.152099	0.153151	0.223027	0.163016	0.109257	-0.668948	0.0235262	0.0126565	0.152698	-0.205908	-0.439484	0.329233	NA	0.512791	0.431818	0.645892	0.436329	0.282404	0.320454	0.80764
779	ANXA3	-0.108827	-0.578374	0.162965	-0.190608	-0.06028	-0.609538	-0.17317	-0.583517	-0.635559	0.047036	-0.393377	-0.0967017	0.00860962	-0.238389	-0.161116	-0.220101	0.134372	-0.254932	-0.587314	-0.569434	0.0276903	0.29824	NA	0.777973	0.622651	0.254925	0.388367	0.298061	1.04489	0.344773
780	ANXA4	0.04003	-0.135217	-0.10368	-0.0334756	0.0678336	-0.097964	0.175311	-0.143887	-0.0520413	0.302386	0.0482354	0.0948135	0.0652928	-0.0400162	-0.0579761	-0.00897499	0.102107	0.0335601	-0.359967	0.0895333	-0.241929	0.0345692	NA	0.20592	0.272951	0.454693	0.150495	0.545315	0.290764	0.415601
781	ANXA5	0.00447616	-0.113905	-0.0434348	-0.0405604	-0.0933843	0.115161	0.205215	0.10942	0.120901	0.261559	0.14887	-0.146399	0.161826	-0.00199813	-0.199001	0.11788	-0.184207	-0.00256171	-0.101995	-0.125814	-0.311027	0.224157	NA	0.467475	0.607549	0.295849	0.786814	0.372481	0.203124	0.321218
782	ANXA6	-0.100863	-0.322056	0.091283	-0.156085	-0.0539042	0.226615	0.139843	0.102598	0.350632	0.119919	0.159767	-0.0115062	-0.128309	-0.162774	-0.169221	-0.142949	-0.251002	0.143193	-0.26529	-0.378822	0.416101	-0.233535	NA	0.512077	0.309396	0.174574	0.33604	0.563615	0.555986	0.402165
783	ANXA7	-0.252367	-0.194872	-0.0440702	-0.432525	-0.277117	-0.344351	0.0910122	-0.550883	-0.137819	0.11574	0.0662849	-0.216191	-0.376579	-0.164332	-0.45994	-0.405111	-0.121887	-0.432346	-0.230814	-0.158931	-0.247678	0.159537	NA	0.388469	0.777098	0.511449	0.948402	0.485518	0.664542	0.243817
784	ANXA8	-0.557315	-0.470275	-0.129303	-0.474519	-0.658225	-0.554967	-0.664342	-0.52584	-0.584095	-1.4173	0.0886114	-0.41184	-0.753864	-0.506242	-0.347572	-0.601465	-0.998158	-0.318293	-0.384258	-0.556291	-0.0609419	-0.197665	NA	0.946248	0.346472	1.18111	0.823138	1.05018	0.881362	0.183669
785	ANXA8L1	-0.229759	-0.0567448	0.122312	-0.533499	-0.21815	-0.783003	0.0572143	-0.52842	-1.03759	-0.386525	0.500953	-0.20285	-0.193519	-0.292908	-0.238095	-0.828903	-0.288748	-0.147553	-0.254169	0.140679	0.00369692	0.240927	NA	0.922738	0.360319	0.329754	0.75841	0.509402	0.547432	0.468604
786	ANXA9	-0.0799787	-0.21614	-0.407157	-0.164078	-0.0460341	-0.194431	-0.188884	-0.341984	-0.0468769	-0.49874	0.120972	-0.0192082	-0.10553	-0.115198	-0.144685	-0.18347	-0.117826	0.0257577	-0.190093	-0.242188	-0.637149	-0.177165	NA	0.278663	1.0147	0.251037	0.238174	0.309591	0.263388	0.640772
787	AOAH	-0.039674	-0.072348	0.130138	0.0861799	0.0293901	0.200256	-0.253643	-0.120925	0.521438	-0.454341	-0.0529453	-0.0485332	-0.0193523	-0.0511367	0.0304897	0.14187	0.164605	-0.105825	-0.0881289	-0.0565671	0.511036	-0.250761	NA	0.527426	0.401713	0.153663	0.571865	0.299872	0.195854	0.379259
788	AOC1	0.0778038	-0.0531595	-0.0139494	-0.0758261	-0.121483	-0.555758	-0.15236	-0.915508	-0.196007	-0.0259876	-0.278733	-0.118547	0.217653	0.134306	-0.006158	-0.145494	-0.178718	-0.0642481	0.0444032	-0.150722	0.400525	-0.428424	NA	0.694104	0.156341	0.438899	0.2111	0.308136	0.0798454	0.321314
789	AOC2	-0.00629352	-0.131075	-0.381963	-0.0383182	-0.29252	-0.291598	-0.0698178	-0.15985	-0.423346	-0.107038	-0.0325976	-0.0637833	0.0120136	0.0328892	0.00904123	-0.0856777	-0.364845	-0.220195	-0.105965	-0.156185	-0.421417	-0.342508	NA	0.546185	0.740848	0.192465	0.280963	0.414833	0.212706	0.548229
790	AOC3	-0.0658061	-0.268506	0.137027	-0.180214	-0.0682377	0.18385	-0.418199	0.379929	-0.012228	-0.497106	-0.339293	-0.100561	-0.167292	0.0704346	-0.31731	-0.0431183	-0.523617	0.387142	-0.315489	-0.221524	0.431343	-0.15729	NA	0.674397	0.726316	0.244888	0.313565	0.954567	0.495081	0.335495
791	AOX1	-0.0614294	0.19406	-0.091623	-0.198674	-0.478778	-0.439317	-0.702433	-0.676728	-0.201906	-0.807338	-0.597528	0.175	-0.145359	-0.213929	-0.330123	-0.0672248	-0.542081	-0.415475	0.174752	0.213368	-0.436032	0.252786	NA	0.708951	1.04179	0.359519	0.340945	0.934906	0.664903	0.36235
792	AP1AR	-0.0561463	0.0285959	-0.0905582	0.0192446	0.0436648	0.0505709	0.410014	0.0755137	0.0256281	0.600011	0.220018	-0.290057	0.193851	-0.0722327	-0.0527031	0.0911924	0.053378	0.0339516	0.105633	-0.0484408	-0.20697	0.0258535	NA	0.458795	0.770061	0.531653	0.51647	0.473868	0.235458	0.322347
793	AP1B1	-0.13658	0.368985	-0.445697	0.23854	0.0837484	0.00960845	0.535619	0.110143	-0.0909259	0.329259	0.741979	-0.278063	0.0455198	-0.177196	0.119329	0.357751	-0.074774	0.242271	0.510401	0.227569	-0.469524	-0.421871	NA	0.225122	1.39257	0.302771	0.881583	0.77627	1.53734	0.507072
794	AP1G1	0.00431256	0.0920708	-0.0410393	0.103556	0.045426	-0.171263	-0.386897	-0.481728	0.139201	-0.746525	-0.027269	-0.0716857	0.0573942	0.0272292	0.104966	0.102146	0.0696349	0.021217	0.00300656	0.181135	0.00970179	-0.0917805	NA	0.998933	0.607321	0.422508	0.865648	0.402272	0.412233	0.194598
795	AP1G2	-0.173324	-0.198639	-0.094515	-0.36441	-0.0345034	-0.309218	-0.232882	-0.8138	0.195363	-0.344499	-0.121264	0.0320219	-0.220025	-0.33197	-0.565364	-0.163456	-0.0277202	-0.0412867	-0.166794	-0.230483	0.0312097	-0.22024	NA	0.334681	0.275528	0.427128	0.621002	0.163929	0.326753	0.378538
796	AP1M1	-0.41526	-0.0688745	-0.113979	-0.15416	-0.139545	-0.599402	-0.0292925	-0.737283	-0.461521	0.0725313	-0.131116	-0.279743	-0.294856	-0.671182	-0.205866	-0.102454	-0.271423	-0.00766763	-0.0112453	-0.126504	-0.0296322	-0.198326	NA	1.00669	0.228269	0.917215	0.459608	0.257758	0.365906	0.290302
797	AP1M2	-0.335536	-0.218115	-0.0877584	-0.0992932	-0.0736711	0.0187975	-0.402921	-0.100608	0.138204	-0.538711	-0.267131	-0.354829	-0.392986	-0.258793	-0.14276	-0.055826	-0.391663	0.24432	-0.110813	-0.325417	-0.126123	-0.0493935	NA	0.247686	0.422112	0.90309	0.296631	0.308278	0.332715	0.228475
798	AP1S1	-0.171788	0.201127	0.275684	0.0700199	0.114969	0.104852	0.475165	-0.326333	0.536037	0.383044	0.567286	-0.0770994	-0.0158681	-0.422396	0.148495	-0.008455	-0.0932936	0.323231	0.0939938	0.308259	0.0424936	0.508874	NA	0.419792	1.00194	0.407823	0.586851	0.560554	0.623906	0.371318
799	AP1S2	-0.328581	-0.105091	-0.149326	0.0122422	-0.166059	-0.154008	-0.14042	-0.127527	-0.180489	-0.183099	-0.0977403	-0.206504	-0.46249	-0.316749	-0.142874	0.167358	-0.138963	-0.193155	-0.127206	-0.0829765	0.108291	-0.406944	NA	0.226576	0.425662	0.66354	0.269198	0.275396	0.373922	0.250183
800	AP1S3	-0.23546	-0.277667	-0.340236	-0.307438	-0.503025	-0.867192	-0.330838	-0.930002	-0.804382	-0.250674	-0.411002	-0.373224	-0.152045	-0.18111	-0.36709	-0.247787	-0.500062	-0.505988	-0.472283	-0.0830516	-0.384458	-0.296014	NA	2.07884	0.626132	0.537602	0.818447	0.959374	0.602043	0.465048
801	AP2A1	-0.384369	-0.552395	-0.4168	-0.151789	-0.167635	-0.362925	-0.457523	-0.390305	-0.335546	-0.222657	-0.69239	-0.501287	-0.415754	-0.236066	-0.339539	0.0359603	-0.299561	-0.0357083	-0.35186	-0.75293	-0.0897593	-0.743842	NA	0.501152	1.01216	0.74958	0.519914	0.334227	1.00393	0.712912
802	AP2A2	0.164184	-0.224818	-0.173265	-0.139863	0.365747	-0.530684	-0.0715211	-0.0425875	-1.01878	0.161913	-0.304955	0.0232212	0.126792	0.342538	-0.0457902	-0.233935	0.157729	0.573766	-0.348069	-0.101568	-0.579998	0.233469	NA	0.547899	0.333014	0.69037	0.340673	1.02602	0.332052	0.342425
803	AP2B1	-0.214356	-0.245741	-0.298209	-0.0830555	-0.0836865	-0.424786	-0.331481	-0.414763	-0.434809	-0.583973	-0.0789878	0.0306084	-0.333461	-0.340215	-0.188542	0.0224308	-0.0920599	-0.075313	-0.0573601	-0.434122	-0.190271	-0.406147	NA	0.262525	0.927217	0.457175	0.330637	0.681467	0.508057	0.558839
804	AP2M1	-1.28196	-1.2108	-0.851453	-0.972841	-1.14994	-1.22855	-0.911717	-1.40788	-1.04922	-1.33441	-0.489022	-1.25012	-1.35275	-1.24302	-0.903425	-1.04226	-0.938545	-1.36133	-1.35329	-1.06832	-0.961882	-0.741023	NA	2.35554	1.12254	4.67366	3.85641	1.85444	4.33961	2.1964
805	AP2S1	-1.42708	-1.3435	-1.24844	-1.44562	-1.30751	-1.22919	-1.53732	-1.18868	-1.26971	-1.20725	-1.8674	-1.87744	-1.07385	-1.32997	-1.18037	-1.71088	-1.24398	-1.37104	-1.48954	-1.19745	-1.31168	-1.18521	essential_DepMap	3.16516	2.93873	4.69897	5.41623	2.91001	5.29128	2.94542
806	AP3B1	-0.0555404	-0.257925	-0.175099	-0.089193	-0.125261	-0.292605	-0.129158	-0.467727	-0.117482	0.280837	-0.539152	0.0964403	-0.137739	-0.125323	0.0965453	-0.274931	0.146175	-0.396696	-0.440857	-0.0749925	-0.166528	-0.18367	NA	0.353881	0.519662	0.283162	0.413733	0.405762	0.434164	0.304168
807	AP3B2	0.299324	-0.0493785	-0.108086	0.289474	0.136929	0.056613	0.0109552	0.136998	-0.0237716	-0.178297	0.200208	0.279208	0.425581	0.193182	0.344022	0.234926	0.272723	0.00113412	-0.0366219	-0.0621351	0.375226	-0.591398	NA	0.545148	0.426664	1.48149	1.04766	0.464908	0.288762	0.327165
808	AP3D1	-0.262673	-0.273476	-0.123762	-0.0420608	-0.243657	-0.607156	-0.661356	-0.874825	-0.339487	-0.626037	-0.696674	-0.183229	-0.267085	-0.337704	0.0605079	-0.14463	-0.137461	-0.349852	-0.0760341	-0.470917	-0.0955835	-0.15194	NA	0.861235	0.96746	0.583359	0.308684	0.464858	0.325304	0.146086
809	AP3M1	-0.405565	-0.42518	-0.402045	-0.858233	-0.0784638	-0.670509	-0.380933	-0.864849	-0.476168	-0.374205	-0.387662	-0.356569	-0.355501	-0.504624	-0.516812	-1.19965	0.168381	-0.325308	-0.558392	-0.291968	-0.398473	-0.405616	NA	0.758875	0.430585	0.872895	1.6287	0.270192	0.647597	0.602277
810	AP3M2	-0.414813	-0.322534	-0.036529	-0.2654	-0.38801	-0.41296	-0.0301697	-0.258588	-0.567332	0.0858938	-0.146233	-0.507321	-0.345197	-0.391921	-0.0218924	-0.508908	-0.473319	-0.302701	-0.417825	-0.227244	-0.201586	0.128528	NA	0.323599	0.268302	0.954677	0.420536	0.658615	0.584284	0.292732
811	AP3S1	-0.0106554	0.143342	-0.175116	-0.0820489	-0.0183489	-0.525872	-0.014106	-0.670514	-0.381231	-0.378034	0.349822	-0.127297	0.0804473	0.0148839	-0.0370529	-0.127045	-0.0217718	-0.014926	0.281788	0.0048972	-0.268622	-0.0816105	NA	0.533934	0.292243	0.203426	0.137415	0.234794	0.617343	0.308322
812	AP3S2	0.0673434	-0.0764467	-0.00364459	0.00669804	-0.0697638	0.367307	0.121381	0.30183	0.432785	-0.0937043	0.336466	0.0444429	-0.109833	0.267421	-0.0347358	0.0481319	-0.231508	0.0919801	-0.109774	-0.0431196	-0.141156	0.133867	NA	0.996029	0.341412	0.425969	0.266907	0.473021	0.214827	0.458683
813	AP4B1	-0.294909	-0.441986	-0.340509	-0.304322	-0.120177	-0.488671	-0.324194	-0.561134	-0.416209	-0.249406	-0.398983	-0.36565	-0.214373	-0.304704	-0.273584	-0.335059	-0.068845	-0.17151	-0.339837	-0.544136	-0.159881	-0.521136	NA	0.754021	0.304479	0.793174	0.686628	0.121208	0.729624	0.454087
814	AP4E1	-0.0444477	0.0505645	0.0243233	0.148126	-0.0218232	-0.286583	-0.0470512	-0.256857	-0.316309	0.0400473	-0.13415	0.0588373	-0.0714838	-0.120697	0.137011	0.159242	-0.0817929	0.0381465	0.0252384	0.0758906	-0.079963	0.12861	NA	0.422744	0.182726	0.263603	0.747948	0.24982	0.311109	0.252468
815	AP4M1	0.113945	0.553391	0.396925	0.180515	0.260056	0.561116	-0.0777424	0.22138	0.900851	0.0292624	-0.184747	0.00622649	-0.0459379	0.381548	0.261369	0.099662	0.0830229	0.437089	0.560677	0.546105	0.579596	0.214254	NA	0.890898	0.306053	0.634512	0.718555	0.405064	2.95664	0.835655
816	AP4S1	-0.0682795	-0.110874	0.0861245	0.120092	-0.107967	0.0910274	0.0935984	-0.0718135	0.253868	-0.177239	0.364436	-0.00110275	-0.204619	0.000882909	0.0981305	0.142053	-0.406934	0.190999	-0.171949	-0.0497986	-0.0414848	0.213734	NA	0.73614	0.582238	0.264401	0.417312	0.870149	0.44579	0.64831
817	AP5B1	0.0387246	-0.144902	-0.0458673	-0.056459	-0.131618	-0.0268032	-0.0227381	-0.27627	0.222663	-0.182313	0.136837	-0.0264981	0.00518314	0.137489	-0.102174	-0.0107438	-0.187837	-0.0753984	-0.182189	-0.107616	-0.120949	0.029214	NA	0.360474	0.240272	0.498941	0.122551	0.343744	0.439986	0.344142
818	AP5M1	0.0164289	0.228149	0.270378	0.0352545	0.0507305	-0.0665447	0.406795	0.427779	-0.560868	0.252695	0.560895	-0.0496846	-0.0121912	0.111163	-0.0789295	0.149439	0.203312	-0.101851	0.201058	0.25524	0.220092	0.320663	NA	1.48612	0.960596	0.30103	0.309286	0.360494	0.82058	0.831547
819	AP5S1	0.266799	0.161857	0.139295	0.0967361	0.0785575	0.25708	0.15922	0.339417	0.174744	0.270953	0.0474879	0.122996	0.273334	0.404067	0.0898706	0.103602	0.0923621	0.0647529	0.16945	0.154264	0.331271	-0.0526812	NA	0.677526	0.446852	1.75696	0.644357	0.243486	0.922489	0.388744
820	AP5Z1	0.0998963	0.173052	-0.478362	0.204912	-0.0678507	0.0513375	-0.0160232	-0.156408	0.259083	-0.235467	0.203421	-0.0134231	0.0614694	0.251642	0.224997	0.184827	-0.269039	0.133337	0.168072	0.178032	-0.187624	-0.7691	NA	0.443209	0.403381	0.9914	1.42097	0.614287	0.68201	0.419571
821	APAF1	0.0503823	0.31512	0.319743	0.143189	0.160122	0.145837	0.20518	0.0296704	0.262003	0.427302	-0.0169425	0.186707	-0.0229742	-0.0125863	0.214342	0.0720368	0.244515	0.0757296	0.347165	0.283076	0.277775	0.361711	NA	0.520979	0.708712	0.283997	1.11346	0.335466	1.29561	1.01185
822	APBA1	0.197295	0.101719	0.0768119	0.317229	0.167866	0.0633542	0.0438963	-0.040129	0.166837	-0.0566349	0.144427	0.336499	0.109981	0.145405	0.274551	0.359906	0.149462	0.186271	-0.0318964	0.235334	-0.0521965	0.20582	NA	0.516926	0.908034	0.747147	1.39068	0.616238	0.944236	0.197969
823	APBA2	0.131775	-0.202237	0.173055	-0.047924	-0.180732	0.0830433	-0.474044	-0.00638631	0.172473	-0.333775	-0.614312	-0.0442842	0.274646	0.164963	-0.110887	0.0150389	-0.0230626	-0.338401	-0.34986	-0.0546143	0.273676	0.0724347	NA	0.377667	0.596093	0.404504	0.231	0.418802	0.433674	0.366718
824	APBA3	-0.243133	-0.250089	-0.165902	-0.137286	0.132706	-0.154621	-0.443621	-0.0546583	-0.254583	-0.74037	-0.146873	-0.377837	-0.266529	-0.0850339	-0.0678429	-0.20673	0.0657973	0.199614	0.0110816	-0.511259	0.1377	-0.469504	NA	0.247863	0.525598	0.411168	0.324469	0.431112	0.37818	0.341445
825	APBB1	-0.0256959	-0.13915	0.236658	-0.0391409	0.0895385	-0.0434847	0.18304	0.0185053	-0.105475	-0.289835	0.655916	-0.0403619	0.0110819	-0.0478077	-0.10011	0.021828	-0.0216824	0.200759	-0.0423174	-0.235982	0.163844	0.309471	NA	0.493854	0.540125	0.169411	0.372394	0.825402	0.355665	0.701763
826	APBB1IP	0.265769	0.243898	0.256917	0.200396	0.00165634	0.0471631	0.134707	0.224889	-0.130563	-0.00707464	0.276488	0.214943	0.357933	0.22443	0.272507	0.128286	0.00134542	0.00196726	0.235002	0.252795	0.137971	0.375863	NA	0.25991	0.441946	0.974694	0.680704	0.292711	1.10436	0.609057
827	APBB2	0.0661559	0.0779268	-0.195936	0.0866049	0.0644563	-0.073674	-0.530877	-0.00532221	-0.142026	-0.965446	-0.0963077	-0.0339767	-0.0344325	0.266877	0.219693	-0.0464836	0.150468	-0.0215553	-0.158862	0.314716	-0.101023	-0.290849	NA	0.456193	0.47057	0.651695	0.980551	0.348737	0.377485	0.311295
828	APBB3	0.0181503	-0.286149	-0.0977585	0.0517576	0.135467	0.0884959	0.333373	-0.108971	0.285963	0.253014	0.413732	0.0584173	-0.152694	0.148728	-0.0097981	0.113313	0.00665673	0.264278	-0.626224	0.053925	0.0752281	-0.270745	NA	0.443691	0.667994	0.559091	0.4192	0.362145	0.304167	0.249546
829	APC	-0.392764	-0.535811	-0.491649	-0.71161	-0.328576	-0.390928	-0.255488	-0.190599	-0.591256	-0.504195	-0.00678059	-0.387418	-0.164947	-0.625929	-0.759264	-0.663955	-0.392093	-0.265059	-0.595763	-0.475858	-0.643624	-0.339674	NA	0.663729	0.735595	0.8041	1.83212	0.670979	1.32762	0.734593
830	APC2	-0.0104092	-0.0406954	-0.163967	-0.168892	-0.110602	-0.289319	-0.632317	-0.20338	-0.375259	-0.0694751	-1.19516	-0.0268661	0.160474	-0.164835	-0.0660062	-0.271777	-0.210631	-0.0105736	-0.119349	0.0379585	-0.289289	-0.0386446	NA	0.474412	0.381809	0.460924	0.263867	0.487703	0.524401	0.356498
831	APCDD1	0.241537	0.0411398	0.0849787	0.0876082	0.0724229	0.264725	0.184887	0.130129	0.399321	0.237379	0.132394	0.413079	0.122909	0.188624	0.0986252	0.0765913	0.00353535	0.14131	0.0596441	0.0226355	0.065213	0.104744	NA	0.962335	0.530296	1.36351	0.632244	0.521275	0.41675	0.295391
832	APCDD1L	-0.0416537	0.106701	-0.15833	0.0434517	-0.48638	0.107633	-0.245683	0.513766	-0.298501	-0.310638	-0.180729	-0.319833	0.0840984	0.110773	0.162464	-0.0755604	-0.7275	-0.24526	0.0730804	0.140321	-0.310619	-0.00604054	NA	0.688193	0.296369	0.267606	0.499462	0.756638	0.590701	0.167296
833	APCS	-0.113706	-0.0218319	-0.0804668	0.0104397	0.0846149	-0.074271	0.177934	-0.0829079	-0.0656341	0.345696	0.0101734	-0.211197	-0.163078	0.0331578	0.0808717	-0.0599922	0.104856	0.0643739	-0.0638325	0.0201687	-0.194657	0.0337237	NA	0.254937	0.729053	0.248721	0.203377	0.221006	0.281523	0.238952
834	APEH	-0.29288	-0.234084	-0.158203	-0.133884	-0.277803	-0.536173	-0.165673	-0.50356	-0.568786	-0.460614	0.129268	-0.253661	-0.282816	-0.342162	-0.190812	-0.0769566	-0.377807	-0.1778	-0.233731	-0.234437	-0.234086	-0.0823206	NA	0.973587	0.338628	0.737549	0.229321	0.382093	0.614805	0.259906
835	APELA	0.0217231	0.171738	0.355291	0.0132978	-0.060935	0.0670222	-0.360862	-0.00687479	0.140919	-0.645346	-0.0763785	0.22425	-0.210609	0.0515276	0.183537	-0.156941	-0.295827	0.173957	0.0562518	0.287223	0.231198	0.479383	NA	0.560683	0.38444	0.435334	0.421149	0.227191	0.397251	1.30272
836	APEX1	-0.219302	-0.351602	-0.106284	-0.158194	-0.0975823	-0.364105	-0.0338055	-0.138372	-0.589838	0.0903531	-0.157964	-0.0956876	-0.323018	-0.239201	-0.174084	-0.142304	0.194954	-0.390118	-0.188785	-0.51442	-0.251907	0.039339	NA	0.482217	0.181771	0.323306	0.267916	0.328827	0.635157	0.259144
837	APEX2	-0.0145398	0.0258897	0.0869808	-0.0504896	0.0643444	-0.27475	-0.21486	-0.222136	-0.327363	-0.399942	-0.0297777	0.0890464	-0.0920527	-0.0406131	-0.143881	0.0429016	0.134641	-0.0059526	0.18695	-0.13517	0.00680901	0.167153	NA	0.544352	0.243474	0.422508	0.306343	0.192218	0.275781	0.313301
838	APH1A	0.0679839	-0.293747	-0.118564	-0.0573079	0.0710693	0.0525584	-0.441938	0.467086	-0.361969	0.0146983	-0.898575	-0.0107875	0.198701	0.0160381	-0.246975	0.132359	0.063922	0.0782165	-0.305837	-0.281658	0.315397	-0.552525	NA	0.27507	0.442142	0.36251	0.878849	0.401614	0.337091	0.523879
839	APH1B	0.143092	0.00985051	-0.0251714	0.0499823	-0.00167022	-0.0161374	0.0790064	-0.0283414	-0.0039334	0.381619	-0.223607	0.0961803	0.0542864	0.278808	0.105222	-0.00525774	0.121667	-0.125008	-0.153512	0.173213	-0.188736	0.138393	NA	0.289861	0.467418	0.59346	0.309476	0.352969	0.533073	0.240665
840	API5	-0.0944025	-0.0773355	-0.0183192	-0.0248057	-0.188055	-0.291185	0.0201008	-0.301244	-0.281126	-0.0183561	0.0585577	-0.0626359	-0.122988	-0.0975832	-0.139775	0.0901634	-0.351234	-0.0248766	-0.120563	-0.0341081	0.0831649	-0.119803	NA	0.480921	0.178745	0.258848	0.2329	0.253658	0.213707	0.178293
841	APIP	-0.0261877	-0.0388712	-0.0700819	-0.35333	0.0392599	0.19165	0.115954	0.27009	0.113211	-0.166406	0.398313	0.12959	-0.290841	0.0826879	-0.342161	-0.364499	0.128275	-0.0497547	-0.147741	0.0699988	-0.0935476	-0.0466162	NA	0.495074	0.358566	0.37366	0.617614	0.416348	0.212486	0.401324
842	APLF	-0.214952	-0.137026	0.0383266	-0.367081	0.0569864	-0.0892977	-0.281002	-0.734795	0.5562	-0.813462	0.251459	-0.470218	-0.0156581	-0.158981	-0.482258	-0.251903	0.341836	-0.227864	0.0153343	-0.289387	0.13689	-0.0602371	NA	0.334842	0.35875	0.444906	0.575241	0.406619	0.256271	0.720447
843	APLN	0.124654	0.000502661	-0.087783	0.0967624	0.0780782	0.178441	0.17069	-0.133171	0.490052	0.0517366	0.289643	0.102847	0.322157	-0.051042	-0.0636623	0.257187	-0.0285151	0.184671	-0.058218	0.0592234	-0.236477	0.0609114	NA	0.331342	0.452601	0.677781	0.445904	0.29698	0.470576	0.134887
844	APLNR	-0.0669163	-0.252723	-0.306188	-0.320275	-0.200763	-0.164014	-0.234297	0.345345	-0.673373	-0.70043	0.231836	0.0767254	-0.103655	-0.173819	-0.121169	-0.519381	-0.460101	0.0585752	-0.147266	-0.358179	-0.154169	-0.458208	NA	0.421833	0.363422	0.306273	0.357288	0.743366	0.295901	0.480868
845	APLP1	-0.182622	-0.209956	0.0995721	-0.109577	-0.30287	-0.149441	-0.12565	0.0660194	-0.364901	-0.251102	-0.000196956	-0.275329	-0.06236	-0.210176	-0.121235	-0.0979188	-0.403403	-0.202336	-0.191037	-0.228874	-0.0769543	0.276099	NA	0.242346	0.250937	0.481486	0.335664	0.568033	0.488725	0.542374
846	APLP2	0.123323	0.262322	0.171215	0.361093	0.312182	0.134092	-0.283806	0.208228	0.0599562	-0.0499229	-0.517689	0.158525	0.202067	0.00937763	0.310207	0.411978	0.286711	0.337653	0.19705	0.327594	-0.102837	0.445268	NA	0.418938	0.331339	0.747147	1.13895	1.27375	1.06002	0.640324
847	APMAP	0.164943	0.15064	0.093619	-0.0226168	0.210381	-0.19765	0.213727	-0.391486	-0.00381444	0.350357	0.0770959	0.212876	0.1365	0.145452	-0.0351619	-0.0100716	0.0674532	0.353308	0.257216	0.0440648	-0.125382	0.31262	NA	0.278165	0.682909	0.886057	0.515117	0.408773	0.675419	0.45435
848	APOA1	0.218104	0.322747	0.234046	-0.084576	0.0192231	0.549653	-0.00985824	0.268003	0.831303	-0.366563	0.346846	0.058984	0.299674	0.295654	0.0399951	-0.209147	-0.0152385	0.0536846	0.466497	0.178997	0.500645	-0.0325529	NA	0.682444	0.221404	0.681937	0.725911	0.502918	0.707135	0.8031
849	APOA2	0.163711	-0.112301	-0.049266	0.181258	0.0406063	-0.190679	0.288028	-0.268231	-0.113126	0.472098	0.103958	0.0468764	0.142695	0.301562	0.192381	0.170135	-0.0697748	0.150987	-0.201144	-0.0234585	-0.0764222	-0.0221098	NA	0.349124	0.845305	0.718967	0.860514	0.608562	0.297358	0.139929
850	APOA4	-0.0971863	-0.0881824	0.062136	-0.265978	0.00963562	-0.15774	-0.0157776	-0.0332732	-0.282208	-0.0230567	-0.00849857	-0.0687535	-0.0542907	-0.168515	-0.144656	-0.387301	0.0529475	-0.0336763	-0.0933734	-0.0829915	0.142018	-0.017746	Nonessential_DepMap	0.335537	0.210825	0.254145	0.794982	0.293722	0.117438	0.637822
851	APOA5	0.0733632	-0.129308	-0.0569588	0.023071	0.150842	-0.0737947	-0.0223997	-0.133576	-0.0140135	-0.123757	0.0789577	-0.00188482	0.0898302	0.132144	0.157702	-0.11156	0.164489	0.137195	-0.201542	-0.057073	-0.378845	0.264928	NA	0.144938	0.108198	0.322393	0.232985	0.286216	0.287207	0.391592
852	APOB	-0.0016688	0.00885533	0.0799784	0.0814659	0.224985	0.0488318	-0.0535692	-0.0864646	0.184128	0.101653	-0.208792	-0.02539	-0.0743159	0.0946995	0.0746499	0.0882819	0.389779	0.0601915	-0.0590594	0.0767701	-0.0173912	0.177348	NA	0.447819	0.295699	0.238072	0.832662	0.652426	0.367421	0.234521
853	APOBEC1	0.0921297	-0.0474116	-0.127445	-0.0113991	-0.159306	0.00760782	-0.231408	0.203378	-0.188162	-0.418464	-0.0443517	-0.180608	0.265097	0.1919	-0.034951	0.0121528	-0.156557	-0.162054	-0.245698	0.150875	-0.0782284	-0.176661	Nonessential_DepMap	0.531261	0.323159	0.467246	0.254367	0.245449	0.631053	0.302047
854	APOBEC2	0.0105525	0.0333552	-0.00512749	-0.071177	0.211058	-0.239999	-0.0381664	-0.457636	-0.0223621	0.156776	-0.233109	-0.00640384	0.0602899	-0.0222285	-0.29396	0.151606	0.206785	0.215331	0.246599	-0.179888	-0.171776	0.161521	NA	0.279779	0.278033	0.217527	0.354887	0.733568	0.431229	0.532755
855	APOBEC3A	-0.236246	-0.053731	0.25005	-0.194496	0.00905291	0.0915099	-0.585316	0.0168071	0.166213	-0.530508	-0.640125	-0.116778	-0.269464	-0.322497	-0.108454	-0.280539	-0.0202198	0.0383256	0.172751	-0.280213	0.306285	0.193815	NA	0.397528	0.762258	0.49485	0.267164	0.295747	0.416371	0.863319
856	APOBEC3B	-0.0412846	0.025142	-0.0830595	-0.0428456	-0.205643	0.0472332	0.00699698	-0.0613284	0.155795	0.170995	-0.157001	0.114435	-0.0762263	-0.162062	-0.0637714	-0.0219199	-0.110105	-0.30118	0.0530133	-0.00272925	-0.193133	0.0270134	NA	0.255234	0.239125	0.251812	0.187137	0.243303	0.178234	0.193037
857	APOBEC3C	-0.303192	-0.153659	-0.00533205	-0.260685	-0.143254	-0.114613	-0.015691	0.0617653	-0.290991	0.044351	-0.075733	-0.252687	-0.305883	-0.351005	-0.330075	-0.191295	-0.162258	-0.12425	-0.151511	-0.155806	0.122056	-0.13272	NA	0.297397	0.332528	0.735182	0.61182	0.210998	0.265816	0.158418
858	APOBEC3D	-0.0435254	-0.0190426	-0.300093	0.0642343	0.0963034	-0.217678	-0.149811	-1.212	0.776643	-0.181029	-0.118592	0.123442	-0.490917	0.236898	-0.046531	0.175	0.205543	-0.0129364	0.0734651	-0.11155	0.404692	-1.00488	NA	1.97102	0.698454	0.460924	0.371269	0.453655	0.349139	0.508624
859	APOBEC3F	-0.138332	-0.185285	-0.0523909	-0.0829977	0.0190777	-0.27821	-0.255711	-0.364895	-0.191525	-0.198329	-0.313092	-0.176028	-0.253044	0.0140769	-0.173941	0.00794537	0.0778026	-0.0396472	-0.32724	-0.0433305	0.131214	-0.235996	NA	0.486736	0.419828	0.429457	0.408551	0.304295	0.356715	0.203707
860	APOBEC3G	-0.11324	-0.297439	-0.111341	0.015982	-0.00189662	-0.141477	0.365662	-0.059011	-0.223943	0.359182	0.372141	-0.251721	-0.100277	0.0122781	0.14238	-0.110416	0.0013537	-0.00514695	-0.427316	-0.167561	0.110109	-0.33279	NA	0.154353	0.936348	0.437707	0.30781	0.240861	0.595834	0.252588
861	APOBEC3H	-0.124132	0.0740615	0.0182871	-0.118502	-0.0870361	-0.0394401	0.284539	-0.213719	0.134839	0.376491	0.192588	-0.113743	-0.120908	-0.137744	-0.264544	0.0275393	-0.1276	-0.0464725	-0.00851538	0.156638	-0.285482	0.322056	NA	0.299772	0.619165	0.268411	0.337667	0.229538	0.353087	0.393586
862	APOBEC4	0.0147179	0.166122	-0.404428	-0.0898045	0.0837301	-0.356907	0.295766	-0.244519	-0.469295	0.309437	0.282095	0.123602	-0.00417262	-0.0752762	-0.178232	-0.0013773	0.197595	-0.0301346	0.0825019	0.249742	-0.850505	0.041648	NA	0.712176	0.67471	0.627088	0.54191	0.535645	0.581873	0.589546
863	APOBR	0.0393943	0.121501	0.276017	0.102123	0.107939	0.101808	-0.15754	-0.106065	0.309682	-0.151884	-0.163197	-0.00707723	0.0429819	0.0822784	0.278788	-0.0745424	0.142739	0.0731385	0.114914	0.128087	0.466704	0.0853293	NA	0.545433	0.160711	0.297569	0.415582	0.485608	0.546109	0.581027
864	APOC1	-0.28849	-0.607499	-0.161093	-0.143002	-0.359322	-0.383396	-0.436949	-0.207018	-0.559774	-0.448994	-0.424904	-0.230779	-0.452358	-0.182332	-0.254216	-0.0317876	-0.300985	-0.417658	-0.820802	-0.394195	-0.223361	-0.0988262	NA	0.445747	0.871859	0.739929	0.321004	0.758267	1.05789	0.236501
865	APOC2	-0.024696	-0.00692221	-0.00315603	-0.0154528	-0.282096	-0.289071	-0.526019	-0.213926	-0.364216	-0.566502	-0.485536	-0.046195	-0.282134	0.254241	-0.20968	0.178775	-0.235652	-0.328541	0.0353943	-0.0492387	0.316055	-0.322367	NA	0.245144	0.529987	0.488117	0.33201	0.463751	0.518923	0.313516
866	APOC3	0.0126345	0.0308096	-0.046507	-0.015313	0.208071	0.0138173	0.188604	0.0211851	0.00644952	0.143165	0.234042	0.0430561	-0.054431	0.0492784	-0.0817537	0.0511276	0.27262	0.143522	-0.0495007	0.11112	-0.110493	0.0174793	NA	0.31837	0.52475	0.488117	0.265784	0.504879	0.44938	0.186486
867	APOC4	-0.285474	-0.44625	-0.274201	-0.172045	-0.339886	-0.71361	-0.431399	-0.549518	-0.877702	-0.65691	-0.205888	-0.239586	-0.33755	-0.279285	-0.123368	-0.220722	-0.350397	-0.329374	-0.307515	-0.584985	-0.471498	-0.0769047	NA	0.832278	0.378746	0.571865	0.390038	0.496039	0.880426	0.588077
868	APOD	0.0204426	-0.180573	0.306245	-0.390223	-0.182809	-0.277557	-0.0322281	-0.0969931	-0.45812	-0.0690775	0.00462127	-0.0224558	-0.00662569	0.0904092	-0.481275	-0.299171	-0.0597301	-0.305888	-0.134403	-0.226744	0.316765	0.295725	NA	0.320658	0.316791	0.675718	0.620142	0.327814	0.33486	0.943884
869	APOE	-0.17169	-0.25693	-0.632484	-0.189502	0.0244812	-0.365034	-0.0724213	-0.131038	-0.59903	-0.201575	0.0567319	-0.0909712	-0.214445	-0.209652	-0.168768	-0.210237	0.0276329	0.0213295	-0.238781	-0.275079	-0.414185	-0.850782	NA	0.318162	0.168831	0.255707	0.272613	0.359623	0.401697	0.997482
870	APOF	-0.0476864	-0.00756872	-0.11453	-0.27392	-0.198148	-0.315658	0.237784	-0.287839	-0.343477	0.21288	0.262687	-0.29107	0.161971	-0.01396	-0.14872	-0.39912	-0.351971	-0.0443257	-0.0147013	-0.000436165	0.436622	-0.665682	Nonessential_DepMap	0.37178	0.654724	0.244125	0.620378	0.49384	0.161878	0.286584
871	APOH	-0.237687	-0.422258	-0.206258	-0.225186	-0.0665251	-0.156425	-0.178772	-0.130822	-0.182028	-0.250767	-0.106777	-0.071355	-0.186217	-0.45549	-0.260557	-0.189815	-0.0216017	-0.111449	-0.157547	-0.686969	0.0402013	-0.452717	NA	0.324969	0.445826	0.366532	0.641264	0.135012	0.603445	0.461118
872	APOL1	-0.103484	0.00510514	0.183538	0.147757	0.0137382	0.143243	0.127764	0.405832	-0.119346	0.119646	0.135881	0.0182141	0.0969535	-0.425619	0.132583	0.162931	0.223489	-0.196013	-0.091936	0.102146	0.152686	0.21439	NA	0.325758	0.409621	0.296709	0.71662	0.498161	0.423227	0.515046
873	APOL2	-0.256774	-0.0929092	-0.373376	-0.0677722	-0.309769	-0.44981	0.0196868	0.0490833	-0.948704	-0.22005	0.259424	-0.388972	-0.273208	-0.108143	-0.156289	0.0207442	-0.488719	-0.130819	-0.123617	-0.0622017	-0.149689	-0.597063	NA	0.313391	0.322174	0.380907	0.230926	0.563981	0.177547	0.815407
874	APOL3	-0.00783779	0.0114912	-0.0365211	-0.15921	0.0882989	-0.0146683	-0.0880671	0.190329	-0.219665	-0.092231	-0.0839031	-0.1061	-0.0218822	0.104469	-0.0441215	-0.274298	0.30036	-0.123762	-0.0289406	0.051923	0.175285	-0.248327	NA	0.91284	0.390795	0.257275	0.281083	0.31798	0.514563	0.555924
875	APOL4	-0.0653361	0.270506	0.0918308	0.20854	0.306333	-0.0628822	-0.105592	-0.087164	-0.0386004	-0.169106	-0.0420774	-0.247394	-0.0343239	0.0857093	0.151558	0.265523	0.186658	0.426008	0.1809	0.360113	-0.0163646	0.200026	NA	0.332879	0.204297	0.407823	0.960011	1.02414	1.05465	0.606616
876	APOL5	0.121447	-0.0990696	-0.0240784	0.10595	0.104284	-0.304519	0.236056	-0.719522	0.110483	-0.104216	0.576328	0.0581439	0.156206	0.14999	-0.0199573	0.231857	0.0255961	0.182972	-0.143237	-0.0549025	-0.156565	0.108409	NA	0.421911	0.330619	0.607303	0.314527	0.525769	0.252864	0.525259
877	APOL6	0.254553	0.00651034	0.0198109	0.226152	-0.0532651	0.0816732	-0.184895	-0.0478655	0.211212	-0.267033	-0.102758	0.437454	-0.0772786	0.403483	0.275666	0.176637	-0.137966	0.0314355	0.0359958	-0.0229752	0.265374	-0.225752	NA	0.475104	0.185899	0.540608	1.21717	0.117106	0.190605	0.493292
878	APOLD1	0.144287	0.0154184	0.206401	-0.0217096	-0.177182	0.253009	0.0139988	0.330576	0.175441	0.225511	-0.197513	0.184561	0.247816	0.000484761	-0.18999	0.146571	-0.338698	-0.0156658	-0.0126631	0.0435	0.124677	0.288126	NA	0.594494	0.601713	1.01144	0.254628	0.480054	0.45999	0.866557
879	APOM	-0.0398189	-0.0884424	0.0801233	-0.0670464	-0.0642396	-0.0552715	0.149955	-0.201356	0.090813	0.0950304	0.20488	-0.0699229	0.021148	-0.0706817	-0.0979804	-0.0361125	-0.0483565	-0.0801228	0.0633441	-0.240229	0.186579	-0.0263327	NA	0.452668	0.432697	0.308035	0.186042	0.14367	0.479575	0.335184
880	APOO	-0.0916895	-0.161483	-0.0912605	0.204901	-0.331208	-0.0774687	-0.112336	-0.0107104	-0.144227	-0.011934	-0.212738	-0.00307891	-0.0904226	-0.181567	0.179717	0.230086	-0.414431	-0.247984	-0.351608	0.0286417	-0.0384296	-0.144091	NA	0.46066	0.37845	0.172631	0.978482	0.501958	0.227792	0.204641
881	APOOL	0.129314	0.105783	-0.181608	0.0507761	0.0796958	-0.103369	0.0672028	-0.182804	-0.0239338	0.0500712	0.0843344	0.158252	0.264349	-0.0346577	0.146576	-0.0450235	0.216124	-0.0567327	0.0941756	0.117391	-0.37495	0.0117339	NA	0.292064	0.19788	0.705534	0.594415	0.488237	0.383971	0.48831
882	APOPT1	-0.271446	-0.134092	-0.0235151	-0.198052	-0.120743	0.195192	0.113292	-0.0334612	0.423845	0.0493785	0.177205	-0.0931601	-0.338153	-0.383025	-0.126854	-0.26925	-0.211206	-0.0302796	-0.330604	0.0624195	0.0609626	-0.107993	NA	0.383419	0.419868	0.468521	0.32829	0.330958	0.395045	0.154905
883	APP	0.20474	0.00698123	-0.128342	-0.0190018	0.352295	-0.0508451	0.246832	-0.404271	0.302581	0.454463	0.0391999	0.0433694	0.335999	0.23485	0.0534816	-0.0914853	0.242631	0.461958	0.0525867	-0.0386242	-0.0469373	-0.209746	NA	0.658932	0.717056	0.661544	0.181791	1.6054	0.390582	0.578536
884	APPBP2	-0.0889244	0.0245299	0.264922	-0.203087	-0.234225	-0.135009	0.173565	-0.183177	-0.0868405	0.00392041	0.343209	-0.0196376	-0.214167	-0.0329684	-0.10741	-0.298763	-0.0421775	-0.426273	-0.0964957	0.145555	0.174199	0.355645	NA	0.30274	0.845029	0.224026	0.315716	0.51548	0.366526	0.816924
885	APPL1	-0.171357	-0.192926	0.011271	-0.015816	0.0639009	-0.298723	-0.081308	-0.319155	-0.278291	-0.0877592	-0.0748568	-0.09303	-0.324363	-0.0966789	0.0167052	-0.0483372	-0.138972	0.266774	-0.178335	-0.207517	0.0995817	-0.0770397	NA	0.383425	0.217685	0.455932	0.178683	0.467774	0.545422	0.240994
886	APPL2	-0.010178	-0.123286	-0.0161558	0.103074	0.0558823	0.255762	-0.387943	0.259747	0.251778	0.229433	-1.00532	-0.389978	0.259286	0.100158	-0.0679848	0.274132	0.0402633	0.0715014	0.0264554	-0.273027	-0.238435	0.206124	NA	0.723461	0.670274	0.375718	0.529721	0.292528	0.290929	0.290931
887	APRT	-0.0541361	0.00209648	0.0387086	-0.00684004	-0.0674854	-0.0140481	0.0230291	-0.0716507	0.0435545	-0.0256179	0.071676	0.0239012	-0.0580797	-0.12823	0.0182487	-0.0319288	-0.145061	0.0100904	-0.0456636	0.0498565	0.116829	-0.0394116	NA	0.239001	0.373049	0.111259	0.196717	0.103229	0.281565	0.201719
888	APTX	-0.0685605	-0.103935	-0.0420015	-0.164136	-0.0301952	-0.127196	0.128955	-0.270972	0.0165801	-0.132964	0.390874	0.0162606	-0.00479682	-0.217145	-0.241766	-0.0865046	-0.112096	0.0517059	-0.155582	-0.0522876	-0.110193	0.0261896	NA	0.686291	0.404576	0.388277	0.499866	0.351591	0.360414	0.21477
889	AQP1	0.086493	-0.136995	-0.0740508	-0.00426715	-0.0477889	-0.291285	0.0420094	-0.499088	-0.0834812	0.264439	-0.18042	-0.257568	0.295135	0.221912	-0.157802	0.149268	0.239274	-0.334852	0.0539436	-0.327934	-0.256434	0.108333	NA	0.364753	0.221946	0.500313	0.264856	0.481401	0.283483	0.295759
890	AQP10	0.00618978	0.087036	-0.351006	0.0445299	0.0784077	0.00284671	0.234165	0.103538	-0.0978447	0.235208	0.233122	0.112608	0.0674662	-0.161505	-0.0110407	0.1001	0.0883383	0.0684771	0.0148167	0.159255	-0.235349	-0.466663	NA	0.116776	0.492947	0.404504	0.394275	0.503548	0.508393	0.423716
891	AQP11	-0.0550976	-0.0561755	-0.00363885	0.140623	0.117453	-0.345196	0.155431	-0.196068	-0.494324	0.111833	0.199029	-0.314186	-0.0353801	0.184273	0.242948	0.0382984	0.00736877	0.227537	0.167219	-0.27957	-0.224128	0.21685	NA	0.372885	0.285176	0.369572	0.33388	0.415488	0.359096	0.249183
892	AQP12A	-0.020965	0.00764392	0.043533	0.0622814	-0.377305	-0.014702	-0.101621	0.00704564	-0.0364495	-0.380836	0.177594	0.0554171	0.0903868	-0.208699	-0.0652875	0.18985	-0.258453	-0.496157	-0.181692	0.19698	0.240827	-0.153761	NA	0.339593	0.154741	0.279014	0.398375	0.620414	0.2922	0.255124
893	AQP12B	-0.102321	0.152675	0.060552	-0.0892321	-0.170651	0.00975409	0.254616	-0.222549	0.242057	0.38197	0.127262	-0.0860602	-0.111671	-0.10923	0.0403825	-0.218847	-0.317159	-0.0241418	0.223825	0.081525	0.129982	-0.00887801	NA	0.294029	0.575445	0.402305	0.39504	0.395715	0.597585	0.486281
894	AQP2	0.0270116	-0.0732926	0.105537	-0.0485004	0.28164	-0.173983	-0.0476753	-0.337226	-0.0107392	-0.354142	0.258791	-0.0439942	0.137593	-0.0125642	0.0375577	-0.134559	0.315851	0.247428	-0.146769	0.000183761	0.0489841	0.16209	NA	0.263767	0.500979	0.369572	0.213998	0.787107	0.279353	0.374693
895	AQP3	0.0187327	-0.0849623	0.0403655	-0.0171319	0.0871537	-0.1857	-0.318628	-0.140067	-0.231333	-0.315611	-0.321646	-0.0741432	-0.00226621	0.132608	-0.109126	0.074862	-0.100348	0.274655	-0.168836	-0.00108827	0.0602002	0.0205309	NA	0.526156	0.290637	0.638272	0.476176	0.333702	0.357778	0.297358
896	AQP4	0.248341	0.00867016	0.161667	0.0899622	0.187087	0.171185	-0.224211	0.197965	0.144404	0.105848	-0.554269	0.175307	0.387499	0.182218	0.142338	0.037586	0.0304976	0.343677	0.169135	-0.151795	0.015456	0.307877	NA	0.490354	0.266085	0.924453	0.374585	1.20595	0.752018	0.671316
897	AQP5	-0.228021	-0.252855	-0.200663	-0.267812	-0.447232	-0.669889	0.155749	-0.64539	-0.694388	0.143608	0.16789	-0.310825	0.000683177	-0.37392	-0.372978	-0.162646	-0.341903	-0.55256	-0.205061	-0.300649	0.0974357	-0.498762	NA	0.750459	0.315096	0.414539	0.239122	0.833777	0.343638	0.378709
898	AQP6	-0.100297	-0.306035	-0.453812	-0.475296	-0.574374	-0.483729	-0.36957	-0.49832	-0.469139	-0.265406	-0.473733	-0.227365	-0.288402	0.214876	-0.507741	-0.44285	-0.802016	-0.346732	-0.329576	-0.282494	-0.519255	-0.388369	NA	0.699513	0.422888	0.319664	0.85541	0.860094	0.454798	0.739952
899	AQP7	-0.466452	-0.815931	-0.669888	-0.74616	-0.221525	-0.613677	-0.471344	-0.678575	-0.54878	-0.458971	-0.483717	-0.590788	-0.433029	-0.375538	-0.804497	-0.687824	-0.068715	-0.374334	-1.09827	-0.533589	-0.474631	-0.865146	NA	0.960883	0.829603	1.43771	1.37906	0.70506	1.32352	1.4798
900	AQP8	0.0611856	0.106101	0.377554	0.025578	-0.0765999	0.0396825	0.05694	0.417711	-0.338346	-0.00934245	0.123222	0.167239	-0.062248	0.0785655	0.0161212	0.0350347	-0.207559	0.0543595	0.191482	0.0207193	0.41819	0.336919	Nonessential_DepMap	0.391884	0.279427	0.411168	0.314003	0.300722	0.500884	1.39121
901	AQP9	0.0581303	-0.33408	-0.0741311	-0.0171785	0.0922723	-0.303383	0.194207	-0.14414	-0.462626	0.162574	0.225841	0.088133	0.0520931	0.0341649	-0.0601062	0.0257492	0.0581056	0.126439	-0.291253	-0.376906	-0.136802	-0.0114607	NA	0.331647	0.36582	0.407823	0.289126	1.29282	0.567544	0.195258
902	AQR	-1.19508	-0.990264	-1.45203	-1.80064	-2.13656	-1.04337	-1.12404	-1.15573	-0.931005	-0.894859	-1.35323	-0.924561	-0.856904	-1.80378	-1.09836	-2.50292	-2.85318	-1.41995	-0.663665	-1.31686	-1.14062	-1.76343	essential_DepMap	1.70964	1.5331	3.60206	2.97638	2.94222	2.38131	3.38875
903	AR	-0.0361726	-0.0342323	0.0972068	0.0231019	-0.0953229	0.170692	0.377214	0.215762	0.125623	0.429318	0.325109	0.112842	-0.186999	-0.0343603	0.133864	-0.0876602	-0.131541	-0.0591051	0.0372618	-0.105726	0.233725	-0.0393119	NA	0.803459	0.8288	0.205512	0.250082	0.130789	0.292413	0.447113
904	ARAF	0.147469	-0.0479896	0.101205	-0.0580026	-0.163031	-0.0963251	-0.229069	-0.599673	0.407023	0.0615347	-0.519673	0.252273	0.0331881	0.156946	-0.0411346	-0.0748706	-0.0781901	-0.247872	-0.0413578	-0.0546215	0.392709	-0.190298	NA	0.345105	0.38436	0.716699	0.286207	0.444735	0.258584	0.335578
905	ARAP1	-0.102854	0.399856	0.306028	0.283887	-0.104401	0.0397138	-0.042637	0.0763967	0.003031	0.190677	-0.275951	0.105368	-0.111877	-0.302052	0.111975	0.4558	-0.0768	-0.132002	0.39516	0.404552	0.149866	0.46219	NA	0.342328	0.521744	0.283162	0.746776	0.344862	1.60691	0.608862
906	ARAP2	0.0715757	-0.10095	0.05803	0.149959	0.239886	0.160469	0.0477982	0.221426	0.0995125	0.0396193	0.0559771	-0.185722	0.176032	0.224417	0.117362	0.182556	0.202438	0.277334	-0.0280257	-0.173875	-0.0979557	0.214016	NA	0.632784	0.522399	0.630784	0.885489	0.948026	0.283166	0.562773
907	ARAP3	0.115597	0.0441493	-0.0729037	0.162544	0.0378682	0.268956	-0.108975	0.336264	0.201647	-0.0971791	-0.120771	-0.0369236	0.309129	0.074584	0.240641	0.0844459	0.0341116	0.0416249	-0.0862796	0.174578	-0.274433	0.128626	NA	0.419936	0.330804	0.647817	0.753474	0.399839	0.923243	0.194996
908	ARC	-0.0055311	0.0324288	0.0103871	0.0855519	0.0592212	-0.01459	-0.0788246	0.046595	-0.0757751	-0.0396483	-0.118001	-0.120748	-0.0206716	0.124826	0.0344945	0.136609	0.145227	-0.0267845	0.037031	0.0278266	0.171055	-0.150281	NA	0.146743	0.188951	0.432974	0.867116	0.470544	0.555658	0.440417
909	ARCN1	-1.08324	-0.837226	-0.830283	-1.13765	-0.913627	-1.24002	-0.802255	-0.978976	-1.50107	-0.177893	-1.42662	-1.06644	-0.809327	-1.37394	-1.12411	-1.15119	-0.83621	-0.991044	-0.776807	-0.897644	-0.551566	-1.109	essential_DepMap	1.89569	0.803482	2.6517	3.02637	1.61872	1.90886	1.19513
910	AREG	0.0213897	-0.297704	-0.199139	0.20684	-0.0729445	0.0636757	-0.906527	0.318708	-0.191357	-0.124715	-1.68834	0.120629	0.0200613	-0.076521	0.184496	0.229184	-0.085847	-0.0600419	-0.266759	-0.328649	-0.299936	-0.0983422	NA	0.359548	0.602041	0.289037	0.958667	0.202663	0.35806	0.272438
911	AREL1	-0.07016	-0.302159	-0.432045	-0.22048	0.0232871	-0.244132	-0.339578	-0.250779	-0.237485	-0.486171	-0.192985	-0.0301911	-0.117624	-0.062665	-0.307041	-0.133919	0.282265	-0.235691	-0.361995	-0.242324	-0.513923	-0.350167	NA	0.519698	0.605872	0.211125	0.334227	0.285626	0.541528	0.769602
912	ARF1	-0.280081	-0.55118	-0.74465	-0.00470278	-0.61748	0.00816215	-0.358261	0.0144829	0.00184143	-0.037876	-0.678646	-0.301505	-0.0799178	-0.458821	0.252459	-0.261865	-0.765131	-0.469829	-0.408277	-0.694084	-0.376344	-1.11296	NA	0.217889	0.687558	0.565431	0.391239	1.16705	1.05819	0.740834
913	ARF3	0.125894	0.0642823	0.151981	-0.0211448	0.374727	0.0665854	-0.0962262	0.032709	0.100462	0.274416	-0.466868	0.179867	0.167935	0.0298813	-0.0555261	0.0132366	0.398183	0.351271	0.0900699	0.0384948	0.0472349	0.256727	NA	0.273782	0.536562	0.651695	0.487656	1.66906	0.610568	0.801989
914	ARF4	-1.653	-1.56769	-3.2014	-1.37252	-1.54803	-1.20047	-1.12272	-0.989743	-1.4112	-0.83758	-1.40786	-1.16905	-2.33968	-1.45028	-1.41922	-1.32582	-2.17095	-0.9251	-1.99419	-1.14118	-3.74611	-2.65668	NA	1.3377	1.44505	2.65561	2.23824	2.61297	3.36857	4.15615
915	ARF5	-0.160813	0.100903	0.126657	0.136514	0.02711	0.0689369	-0.226626	0.171191	-0.033317	0.099622	-0.552875	-0.175208	-0.0444423	-0.262788	0.357401	-0.0843735	-0.0477785	0.101999	0.241017	-0.0392112	-0.0949272	0.348241	NA	0.506626	0.447143	0.399027	0.324111	0.282334	0.761193	0.615814
916	ARF6	-0.350704	-0.985384	-1.43012	-0.376853	-1.35254	-0.918095	-1.95689	-0.903767	-0.932423	-1.70797	-2.20581	-0.401739	-0.661903	0.0115309	-0.373729	-0.379977	-1.66959	-1.03549	-1.13583	-0.834937	-1.64263	-1.21762	NA	1.64034	2.78676	0.546682	1.01107	3.39395	1.72557	2.6925
917	ARFGAP1	0.116479	0.0339157	0.0142947	0.0011484	0.093098	-0.494234	0.0157011	-0.685581	-0.302887	-0.110366	0.141768	0.0144805	0.250851	0.0841046	0.0771053	-0.0748085	0.0917039	0.094492	0.312794	-0.244962	0.0285571	3.22502e-05	NA	0.544363	0.374538	0.68403	0.895801	0.28487	0.376249	0.586952
918	ARFGAP2	-0.167021	0.0436481	0.0763673	-0.105152	-0.109662	-0.270821	0.192413	-0.312653	-0.228989	0.275887	0.108939	-0.307178	-0.313138	0.119253	-0.167052	-0.0432517	-0.086263	-0.13306	0.0167611	0.070535	0.254288	-0.101554	NA	0.374106	0.400565	0.441291	0.310651	0.436519	0.373501	0.577796
919	ARFGAP3	0.184397	-0.262302	0.0152813	0.00605704	0.335944	-0.158022	0.198433	-0.151473	-0.164571	0.136371	0.260495	0.0959403	0.176576	0.280674	0.0377841	-0.0256701	0.27529	0.396598	-0.218077	-0.306526	0.00900732	0.0215553	NA	0.410369	0.455684	0.610834	0.161374	1.36842	0.441387	0.447259
920	ARFGEF1	-0.109324	-0.330752	-0.239233	-0.0781737	-0.179861	-0.325871	0.17775	-0.23945	-0.412292	0.243418	0.112081	-0.208184	0.0219167	-0.141705	-0.0830046	-0.0733429	-0.271725	-0.0879956	-0.532436	-0.129068	-0.571059	0.0925924	NA	0.343772	0.317066	0.226214	0.139854	0.191283	0.477701	0.366082
921	ARFGEF2	-0.0358313	-0.110312	-0.0712097	-0.126788	0.160486	-0.0578828	-0.0647786	0.135874	-0.251639	-0.427351	0.297794	-0.441716	0.146048	0.188174	-0.0530864	-0.200489	-0.00243004	0.323402	-0.129205	-0.0914195	0.0672128	-0.209632	NA	0.321609	0.347839	0.372634	0.285264	0.396774	0.324914	0.143135
922	ARFGEF3	0.113504	0.00358175	0.0768869	0.069977	0.0656846	-0.175146	-0.0241114	-0.0322056	-0.318087	-0.204726	0.156504	0.127309	0.123088	0.0901138	-0.00864433	0.148598	-0.206975	0.338345	-0.161716	0.16888	0.301507	-0.147734	NA	0.327648	0.21294	0.640165	0.465841	0.307199	0.294894	0.294412
923	ARFIP1	0.0617969	0.361722	-0.0100601	0.212595	0.043131	0.67333	-0.182448	0.409317	0.937343	-0.130902	-0.233993	0.119262	-0.160745	0.226874	0.203835	0.221354	-0.105854	0.192116	0.506085	0.217358	0.0796247	-0.0997449	NA	1.19674	0.328651	0.610834	0.911352	0.30732	1.20641	0.147618
924	ARFIP2	-0.0177372	-0.164394	-0.0302034	-0.0435712	-0.0467024	-0.498688	0.0310974	-0.588401	-0.408975	-0.231926	0.294121	0.159412	-0.0706363	-0.141987	-0.206307	0.119165	0.0481826	-0.141587	-0.275012	-0.0537763	-0.235094	0.174687	NA	0.672938	0.327427	0.249492	0.65497	0.304168	0.405674	0.478836
925	ARFRP1	-0.954664	-0.880983	-1.08526	-1.13746	-1.22856	-0.350978	-0.791628	0.00731969	-0.709276	-0.625236	-0.958021	-1.20372	-0.862337	-0.797938	-1.12429	-1.15064	-0.67447	-1.78265	-0.7738	-0.988166	-1.04987	-1.12065	NA	0.398423	1.10069	2.60555	1.93083	1.40585	1.5098	1.55454
926	ARG1	0.199419	0.153254	-0.133941	0.25457	0.258085	0.218365	0.246111	0.335163	0.101567	0.616525	-0.124302	0.244812	0.138335	0.215111	0.105461	0.403679	0.392677	0.123494	0.188796	0.117712	-0.130619	-0.137262	NA	0.446348	0.627029	0.832683	0.670747	1.08354	0.529112	0.593417
927	ARG2	-0.149244	-0.0125627	0.123455	-0.0778959	-0.10944	-0.315062	-0.0103088	-0.204158	-0.425966	0.241963	-0.262581	0.0745586	-0.208475	-0.313815	0.0233799	-0.179172	-0.077596	-0.141283	-0.0144865	-0.0106389	-0.062632	0.309541	NA	0.450163	0.370417	0.295849	0.20772	0.27779	0.265897	0.375218
928	ARGFX	0.0223797	-0.186815	-0.067961	-0.0430611	-0.101048	0.0408412	-0.101724	-0.0150424	0.0967248	0.0413781	-0.244826	0.13403	0.0443933	-0.111284	-0.0863938	0.000271564	-0.174536	-0.0275606	-0.231087	-0.142542	-0.0322008	-0.103721	Nonessential_DepMap	0.204871	0.391945	0.245652	0.248094	0.250414	0.302561	0.313905
929	ARGLU1	-0.795875	-0.5812	-1.22057	-0.608624	-1.23175	-0.664081	-0.731664	-0.573827	-0.754335	-0.25753	-1.2058	-0.704043	-0.715305	-0.968276	-0.784056	-0.433193	-1.50532	-0.958176	-0.828846	-0.333554	-1.16547	-1.27567	essential_DepMap	0.834637	0.881821	1.4908	0.994804	1.9099	0.698751	2.20007
930	ARHGAP1	-0.221167	-0.25115	-0.121056	-0.172321	-0.109776	0.156378	-0.517456	0.085203	0.227554	-0.526632	-0.508279	-0.225619	-0.178922	-0.258961	-0.272804	-0.0718383	0.0496523	-0.269204	-0.456413	-0.0458867	-0.197346	-0.0447652	NA	0.316692	0.714499	0.490797	0.254691	0.184097	0.446888	0.236104
931	ARHGAP10	0.176316	0.0965655	0.289036	0.0264627	0.106149	0.414116	0.1934	0.265676	0.562556	0.109988	0.276812	-0.0322206	0.311104	0.250065	-0.00997807	0.0629035	0.146332	0.0659652	0.0817465	0.111384	0.220139	0.357933	NA	1.35286	0.757185	0.534617	0.406199	0.375362	0.438285	0.996837
932	ARHGAP11A	-0.436717	-0.354637	-0.157216	-0.233842	-0.45961	-0.580969	-0.875232	-0.601359	-0.56058	-1.06374	-0.686725	-0.516408	-0.374293	-0.419449	-0.264162	-0.203521	-0.456847	-0.462373	-0.312999	-0.396276	-0.0505271	-0.263905	NA	0.714162	1.27263	1.01368	0.486416	0.898038	0.786416	0.217585
933	ARHGAP11B	-0.338515	-0.114813	-0.193831	-0.389756	-0.306211	-0.409462	-0.767041	-0.125064	-0.69386	-0.785352	-0.748731	-0.212891	-0.308235	-0.494419	-0.543111	-0.236401	-0.427289	-0.185132	-0.198423	-0.031203	-0.0765862	-0.311077	NA	0.566198	1.05646	0.536107	0.52705	0.493766	0.328711	0.463555
934	ARHGAP12	0.155912	-0.0722044	-0.249818	-0.103	-0.0414764	0.346265	0.434506	0.225176	0.467354	0.476752	0.392261	0.107588	0.23557	0.124577	-0.0281678	-0.177832	-0.00567561	-0.0772772	0.10573	-0.250139	-0.553686	0.0540494	NA	0.838053	0.980458	0.723538	0.593291	0.334898	0.510576	0.691236
935	ARHGAP15	-0.149899	0.0380663	0.158168	0.000124492	-0.0295398	-0.0408036	-0.169818	-0.188497	0.10689	0.0481333	-0.38777	-0.0733932	-0.0985174	-0.277787	0.0499237	-0.0496748	-0.182961	0.123881	-0.00410539	0.0802379	0.0649206	0.251415	NA	0.326901	0.371969	0.197911	0.237629	0.290832	0.28714	0.510407
936	ARHGAP17	0.158645	-0.103705	0.087731	-0.0930971	0.100256	-0.025143	0.211571	-0.00399782	-0.0462881	0.461218	-0.0380757	0.165339	0.0754311	0.235166	-0.12897	-0.0572242	0.26391	-0.0633974	0.0229092	-0.230319	-0.00128974	0.176752	NA	0.418802	0.754201	0.806875	0.249966	0.693193	0.176294	0.573477
937	ARHGAP18	0.0322698	-0.191492	0.279652	-0.0138806	0.18024	0.0872832	0.191991	0.197082	-0.0225159	0.329975	0.0540075	-0.139992	0.17586	0.0609409	0.0606509	-0.0884122	0.171585	0.188895	-0.103586	-0.279398	0.339072	0.220233	NA	0.328018	0.423762	0.50724	0.257908	0.805068	0.395666	0.966836
938	ARHGAP19	0.0499	0.266613	0.303618	0.0593072	0.147809	-0.110392	0.169331	0.372154	-0.592938	0.0479621	0.290699	0.248532	0.0562743	-0.155107	0.201487	-0.0828726	-0.0498588	0.345476	0.16291	0.370316	0.374992	0.232244	NA	0.417956	0.658664	0.906578	0.844922	0.46989	1.12058	0.672069
939	ARHGAP20	0.247472	0.31489	0.343706	0.0982491	-0.0292927	0.191913	0.355253	0.365423	0.0184029	0.321142	0.389364	0.188881	0.259929	0.293606	0.0772483	0.11925	-0.192039	0.133454	0.490781	0.138999	0.109268	0.578144	NA	1.24877	0.844497	1.44855	0.826112	0.251045	0.84351	0.667168
940	ARHGAP21	0.0794969	-0.333754	-0.503421	-0.0759193	0.153326	-0.258255	-0.048096	-0.110863	-0.405647	0.0720799	-0.168272	0.255553	0.0244016	-0.0414638	-0.135001	-0.0168376	-0.0667391	0.373391	-0.436724	-0.230784	-0.594175	-0.412667	NA	0.208811	0.316994	0.474955	0.443149	0.395879	0.495332	0.731996
941	ARHGAP22	-0.207578	-0.561075	-0.409416	-0.220749	-0.148046	-0.342909	-0.656843	-0.190268	-0.49555	-0.770939	-0.542747	-0.213731	-0.255999	-0.153005	-0.0407895	-0.400709	-0.114423	-0.18167	-0.321105	-0.801044	-0.179655	-0.639178	NA	0.453593	0.755612	0.488117	0.408791	0.318108	0.979038	0.438727
942	ARHGAP23	-0.404909	-0.246897	-0.344931	-0.290032	0.018214	0.0524035	-0.139367	0.0212997	0.0835073	-0.81284	0.534105	-0.127098	-0.861675	-0.225954	-0.687094	0.10703	0.044018	-0.00759014	-0.316587	-0.177207	0.176585	-0.866446	NA	0.359151	0.59004	0.462181	0.479602	0.721477	0.367786	0.645323
943	ARHGAP24	-0.0646748	-0.102502	-0.237308	-0.0121452	0.0179413	0.165557	-0.0888005	0.267132	0.0639815	0.0502035	-0.227804	-0.0148892	-0.138978	-0.0401572	-0.126467	0.102177	0.0730005	-0.0371178	-0.0408108	-0.164193	-0.223298	-0.251319	NA	0.593528	0.335603	0.207608	0.413959	0.274276	0.232195	0.203003
944	ARHGAP25	0.133998	0.071036	-0.0555167	0.104662	0.0967923	0.229564	0.150923	0.129223	0.329905	0.325461	-0.0236146	0.211663	0.042571	0.147761	0.0580347	0.15129	0.203117	-0.00953262	-0.0493881	0.19146	0.11673	-0.227763	NA	0.964965	0.485027	0.850781	0.556463	0.371055	0.432921	0.423083
945	ARHGAP26	0.0937498	0.251144	0.163892	0.102787	-0.00709719	0.37654	0.0801148	0.0876683	0.665412	0.464868	-0.304639	0.109181	0.0868086	0.0852595	-0.129971	0.335545	-0.22144	0.207245	-0.00729345	0.509582	0.245344	0.0824404	NA	0.625241	0.510115	0.406714	0.63508	0.300448	0.619361	0.636162
946	ARHGAP27	-0.108476	-0.363609	-0.371966	-0.284631	-0.39376	-0.169486	0.00624052	0.0400591	-0.379032	-0.113185	0.125666	-0.0955909	-0.142496	-0.0873402	-0.128434	-0.440829	-0.324607	-0.462914	-0.31225	-0.414967	-0.572176	-0.171756	NA	0.272369	0.224451	0.281498	0.615969	0.735359	0.538667	0.677512
947	ARHGAP28	-0.0628918	0.0872336	0.176415	0.111054	0.293014	-0.046057	0.115004	0.0105934	-0.102707	-0.171604	0.401613	-0.00978878	-0.0297557	-0.149131	0.186082	0.0360272	0.304496	0.281533	0.09626	0.0782073	0.178804	0.174025	NA	0.147322	0.32647	0.345823	0.479489	1.06413	0.578791	0.676191
948	ARHGAP29	-1.11371	-0.065946	-0.412756	-0.947984	-0.434409	-1.01874	-0.218724	-0.831206	-1.20626	-0.719808	0.282361	-1.27092	-1.37058	-0.699623	-0.88513	-1.01084	-0.263603	-0.605215	-0.0517942	-0.0800978	-0.0436743	-0.781837	NA	1.28375	0.748289	2.15739	2.61241	0.71835	0.398532	0.660916
949	ARHGAP30	-0.0731105	-0.0259107	-0.161515	0.0661681	0.0572098	-0.270726	0.215216	-0.6199	0.0784486	0.281109	0.149323	-0.0983391	-0.0852759	-0.0357165	0.0215742	0.110762	0.16049	-0.0460705	-0.199164	0.147343	-0.0520033	-0.271027	NA	0.44444	0.850147	0.110698	0.475403	0.217123	0.471823	0.255152
950	ARHGAP31	0.241605	0.25099	-0.0367848	0.0908658	0.184544	0.346308	0.394828	0.289583	0.403033	0.576632	0.213024	0.342213	0.114838	0.267763	0.168489	0.0132427	0.233693	0.135395	0.215844	0.286136	0.00932061	-0.0828903	NA	1.24263	0.667496	1.11805	0.874439	0.565351	1.16424	0.405392
951	ARHGAP32	0.127898	0.316052	0.191426	0.199727	0.151249	0.251343	0.0932744	0.271191	0.231495	0.275934	-0.0893848	0.105281	0.152118	0.126296	0.308628	0.0908271	0.1045	0.197998	0.418256	0.213847	0.161281	0.221571	NA	0.699756	0.538877	0.730487	1.01604	0.661344	0.802109	0.746202
952	ARHGAP33	-0.201404	-1.21577	-0.590026	-0.27643	-0.418703	-0.169713	-0.207425	-0.447615	0.108188	-0.153253	-0.261596	-0.189576	-0.266701	-0.147936	-0.484952	-0.0679079	-0.552264	-0.285142	-1.29915	-1.13239	-0.913425	-0.266626	NA	0.287784	0.240498	0.266001	0.455851	0.838169	2.05063	0.556559
953	ARHGAP35	-0.0567248	-0.541014	-0.415413	-0.197467	0.0244153	-0.469545	-0.180864	-0.734073	-0.205018	0.19993	-0.561659	0.202529	-0.2087	-0.164003	-0.272804	-0.122131	-0.102832	0.151662	-0.544606	-0.537422	-0.661743	-0.169084	NA	0.362145	0.443866	0.31158	0.408162	0.319288	1.08551	0.368937
954	ARHGAP36	-0.0403207	-0.0431427	-0.332726	-0.251349	-0.0880426	-0.068311	-0.0688186	-0.153405	0.0167832	0.0551609	-0.192798	-0.0506907	-0.064719	-0.00555259	-0.346452	-0.156247	-0.130638	-0.0454469	-0.141712	0.0554266	-0.308802	-0.35665	NA	0.172476	0.172514	0.199971	0.43816	0.260519	0.370794	0.508589
955	ARHGAP4	0.0101435	-0.0821788	0.243063	0.00825181	0.0841357	-0.178989	0.123389	-0.70575	0.347772	0.212437	0.0343407	0.0132871	0.0695535	-0.0524102	-0.0149996	0.0315032	0.174391	-0.00612006	0.0286727	-0.19303	0.206521	0.279605	NA	0.416926	0.604006	0.438899	0.197175	0.482771	0.251146	0.91961
956	ARHGAP40	-0.160802	-0.181387	0.257807	-0.0370933	0.00199232	-0.293462	-0.0851171	-0.57299	-0.0139342	-0.0576489	-0.112585	-0.1601	-0.16054	-0.161767	0.0117469	-0.0859334	-0.0415102	0.0454948	-0.15668	-0.206094	0.0365619	0.479052	NA	0.497013	0.33007	0.274088	0.277502	0.230051	0.4642	0.981238
957	ARHGAP42	-0.401045	-0.164824	-0.146932	-0.245601	-0.216694	-0.319745	0.093666	0.0581419	-0.697633	0.147873	0.0394587	-0.175075	-0.545021	-0.483038	-0.0910035	-0.400198	-0.439026	0.00563726	0.00492164	-0.334569	-0.164304	-0.12956	NA	0.442525	0.328093	0.636388	0.311264	0.408624	0.309441	0.256769
958	ARHGAP44	-0.0235572	-0.0404807	0.118024	0.0405785	0.0258063	-0.166398	0.131268	-0.251834	-0.0809619	0.371284	-0.108748	-0.168161	0.0603363	0.0371527	-0.0138714	0.0950284	0.0314746	0.0201381	0.0266163	-0.107578	0.0717087	0.16434	NA	0.286656	0.649258	0.280669	0.328785	0.608227	0.211825	0.282055
959	ARHGAP45	2.95489e-05	-0.0284155	0.213982	-0.208747	-0.0344837	-0.0758525	-0.0569476	-0.07206	-0.0796449	-0.302357	0.188462	-0.0512001	-0.0984869	0.149776	-0.1735	-0.243994	-0.10017	0.0312023	-0.0987507	0.0419198	0.306948	0.121016	NA	0.342547	0.244259	0.232102	0.468298	0.245644	0.112872	0.582005
960	ARHGAP5	-0.0681874	0.300624	0.227254	-0.0482915	-0.0933402	0.213904	0.158015	0.375445	0.0523622	0.400173	-0.0841418	-0.348795	0.25421	-0.109978	0.0137791	-0.110362	0.205779	-0.392459	0.278696	0.322553	0.385618	0.0688899	NA	0.832833	0.530414	0.331614	0.269735	0.347212	1.09251	0.680106
961	ARHGAP6	0.035047	0.0615243	0.0874052	0.140534	-0.178434	0.079598	0.139853	0.29292	-0.133724	0.255263	0.0244426	0.104994	0.026681	-0.0265343	0.0654067	0.215661	-0.172785	-0.184082	0.147291	-0.0242429	-0.0523114	0.227122	NA	0.574238	0.506821	0.400117	1.25191	0.190235	0.358576	0.678775
962	ARHGAP8	0.0110149	-0.162735	-0.217473	0.0991586	0.0965462	-0.18599	-0.264663	-0.378574	0.00659371	0.0219376	-0.551265	0.0952802	0.0934283	-0.155664	0.291786	-0.093469	0.0807294	0.112363	-0.368276	0.0428064	-0.107841	-0.327104	NA	0.243307	0.393108	0.332547	0.361399	0.717627	0.270523	0.335857
963	ARHGAP9	-0.284776	-0.0483151	-0.0148953	-0.060744	0.079064	0.10077	-0.229816	0.173507	0.0280336	-0.279492	-0.18014	-0.266388	-0.115537	-0.472403	0.0750492	-0.196537	0.173824	-0.0156962	-0.119924	0.0232934	0.0821102	-0.111901	NA	0.370585	0.46489	0.354578	0.412076	0.626343	0.48718	0.25471
964	ARHGDIA	-0.143704	0.0453141	-0.164979	-0.000383931	0.292352	0.106491	0.120572	-0.0740862	0.287068	0.395184	-0.154039	-0.0599836	0.0571755	-0.428305	0.0356387	-0.0364066	0.225451	0.359252	0.0296029	0.0610252	-0.162278	-0.16768	NA	0.473861	0.399795	0.283997	0.377084	0.886433	0.33286	0.2824
965	ARHGDIB	0.138095	0.240646	0.295905	0.0791084	0.234365	0.0891864	-0.191505	0.330359	-0.151986	-0.145206	-0.237803	0.135417	0.181274	0.0975933	0.232566	-0.0743494	0.231429	0.237301	0.158175	0.323118	0.247542	0.344268	NA	1.35393	0.394404	0.917215	0.40217	1.10794	1.02204	1.44691
966	ARHGDIG	0.128128	0.276646	0.254247	0.104783	0.262361	0.168858	0.421156	-0.215084	0.552799	1.00733	-0.165016	0.103608	0.284274	-0.00349806	0.103834	0.105733	0.125584	0.399139	0.361517	0.191775	0.380876	0.127618	NA	0.549349	0.394992	0.735182	0.570248	0.98423	0.801208	0.488
967	ARHGEF1	-0.0936725	-0.115965	0.260593	-0.270997	-0.210074	-0.37698	-0.155292	-0.562315	-0.191645	-0.017072	-0.293511	-0.0493339	-0.0141758	-0.217508	-0.642576	0.100581	-0.269349	-0.150798	0.0271479	-0.259077	0.148007	0.37318	NA	0.53291	0.304089	0.185752	0.463713	0.222377	0.253969	0.806971
968	ARHGEF10	0.00851338	0.0936474	0.334403	0.0548796	-0.152804	-0.128828	0.267016	-0.147342	-0.110315	0.419738	0.114295	-0.00482638	0.0127856	0.017581	-0.0949541	0.204713	-0.0267768	-0.278831	0.254775	-0.0674802	0.334587	0.334219	NA	0.668938	0.550586	0.369572	0.909095	0.297246	0.287679	1.30427
969	ARHGEF10L	0.0566483	0.0632969	0.0926692	0.153238	0.186904	0.00185276	0.13689	-0.00247965	0.00618517	-0.011155	0.284934	0.0542703	-0.039177	0.154851	0.0932556	0.213219	0.142784	0.231023	-0.035679	0.162273	0.192198	-0.00685953	NA	0.459577	0.377656	0.465974	1.03552	0.491295	0.448849	0.461319
970	ARHGEF11	-0.141851	-0.17262	-0.143209	-0.221752	0.228363	-0.00161327	-0.751378	-0.0629785	0.0597519	-0.70043	-0.802326	-0.185262	-0.145962	-0.0943282	-0.100402	-0.343102	0.213794	0.242933	-0.3072	-0.0380386	-0.26481	-0.0216079	NA	0.207052	0.952375	0.636388	0.37178	0.831164	0.234939	0.251769
971	ARHGEF12	0.0504456	0.081742	0.0805822	0.0579023	-0.36934	-0.0289273	-0.670359	0.0842169	-0.142071	-0.551762	-0.788956	0.103768	0.037482	0.0100873	-0.0734491	0.189254	-0.654392	-0.0842881	0.0917905	0.0716934	0.0321861	0.128978	NA	0.277642	0.720583	0.316053	0.403832	0.63456	0.501476	0.581657
972	ARHGEF15	-0.0435119	0.0496618	0.201143	-0.200276	0.0365253	0.0700572	0.166533	-0.103252	0.243366	0.0281628	0.304903	0.0538303	-0.0434934	-0.140873	-0.22716	-0.173393	-0.0740793	0.14713	-0.150504	0.249828	0.0448852	0.357402	NA	0.570038	0.233557	0.376751	0.301921	0.521628	0.366885	0.725238
973	ARHGEF16	-0.145445	-0.0487525	0.367343	-0.0840975	-0.917972	-0.268177	-0.696274	0.215567	-0.75192	-0.158429	-1.23412	-0.0873036	-0.0241113	-0.324921	-0.190145	0.0219498	-0.234414	-1.60153	0.129246	-0.226751	0.408781	0.325905	NA	0.301943	0.706737	0.238072	0.126267	0.495794	0.193271	0.786881
974	ARHGEF17	0.19493	-0.0831749	0.272235	0.0693585	0.156666	-0.136069	0.0830089	0.257981	-0.530119	0.116323	0.0496946	0.0938934	0.322329	0.168568	0.153304	-0.0145871	0.297914	0.0154184	0.0795922	-0.245942	0.440267	0.104202	NA	0.446609	0.235331	0.542118	0.705798	0.347339	0.214816	0.634027
975	ARHGEF18	-0.0559451	-0.317322	-0.116249	-0.428987	0.231444	-0.126797	-0.844373	-0.0751537	-0.17844	-0.566618	-1.12213	-0.321179	-0.120636	0.27398	-0.461149	-0.396824	0.236877	0.226012	-0.277572	-0.357071	-0.184052	-0.0484462	NA	0.399937	0.975513	0.301899	0.695402	0.678578	0.60082	0.280089
976	ARHGEF19	-0.0352028	0.169153	-0.292127	-0.190511	-0.103027	0.0711629	0.289399	-0.165229	0.307555	0.397861	0.180936	-0.149139	0.0402783	0.00325233	-0.126896	-0.254126	-0.322446	0.116391	0.272254	0.0660518	-0.098186	-0.486068	NA	0.21316	0.531837	0.20621	0.481651	0.218507	0.373588	0.463625
977	ARHGEF2	-0.0426629	-0.00531652	-0.245685	0.00264239	0.0999122	-0.123521	0.0634122	0.161032	-0.408074	0.544763	-0.417938	0.0275349	-0.0304693	-0.125054	-0.0358997	0.0411845	0.0541025	0.145722	-0.129861	0.119228	0.0735571	-0.564926	NA	0.327173	0.540408	0.279014	0.379515	0.26963	0.290429	0.282571
978	ARHGEF25	-0.0282678	-0.231515	0.0746952	-0.0989613	0.0874639	-0.052336	-0.0274128	0.0372612	-0.141933	0.150566	-0.205392	-0.0451182	0.00428924	-0.0439745	-0.202529	0.00460623	-0.0535503	0.228478	-0.293981	-0.169048	-0.012239	0.161629	NA	0.380703	0.243531	0.173925	0.313945	0.415392	0.348887	0.362325
979	ARHGEF26	0.0145517	0.16315	-0.0377735	0.107943	0.0736673	-0.343943	-0.144009	-0.543934	-0.143952	0.0690292	-0.357048	0.148911	-0.112067	0.00681082	0.207083	0.0088039	0.250377	-0.103042	0.165701	0.1606	-0.0899802	0.0144332	NA	0.500547	0.249407	0.270026	0.619029	0.697637	0.585369	0.105773
980	ARHGEF28	0.213037	-0.0202078	-0.105491	0.0450197	-0.188771	-0.125724	0.000133092	-0.364046	0.112598	0.0610989	-0.0608327	0.200042	0.314875	0.124195	0.071402	0.0186374	-0.18282	-0.194721	0.00470971	-0.0451252	-0.156022	-0.0549591	NA	0.27735	0.357476	0.899629	0.283225	0.319012	0.246203	0.203023
981	ARHGEF3	0.044314	-0.415403	-0.0315965	0.0798018	-0.151106	0.0484723	-0.111034	0.17447	-0.0775257	-0.071392	-0.150675	-0.058503	0.107079	0.0843665	0.0683686	0.091235	-0.116356	-0.185857	-0.222847	-0.607959	-0.316332	0.253139	NA	0.262291	0.263177	0.598599	0.367502	0.225742	0.591507	0.490596
982	ARHGEF33	-0.0781276	-0.300387	-0.00760189	-0.249631	0.0290465	-0.101388	0.0397479	0.0166604	-0.219437	0.109327	-0.0298309	-0.156413	0.103282	-0.181251	-0.0527767	-0.446485	0.0297193	0.0283737	-0.466786	-0.133988	0.34634	-0.361544	NA	0.381999	1.21914	0.244888	0.389665	0.651783	0.316408	0.338762
983	ARHGEF35	-0.241342	-0.0726088	0.0902676	-0.122144	0.0112905	-0.195398	-0.275929	-0.138472	-0.252324	-0.0390282	-0.512829	-0.207544	-0.256225	-0.260257	-0.182654	-0.0616334	0.0103328	0.0122482	-0.035921	-0.109297	0.0399089	0.140626	NA	0.254941	0.573416	0.787812	0.31498	0.235122	0.215169	0.247683
984	ARHGEF37	0.0661969	0.107404	-0.318329	-0.0595447	-0.132634	-0.298705	-0.0217092	-0.616277	0.0188667	0.138231	-0.181649	0.0480698	-0.0833695	0.23389	0.0498165	-0.168906	-0.0129525	-0.252316	0.208801	0.00600835	-0.414305	-0.222354	NA	0.276971	0.733169	0.474955	0.336822	0.43894	0.567833	0.500127
985	ARHGEF38	0.0162954	-0.150688	0.0539364	0.0882902	-0.0343361	-0.0192572	-0.158064	0.12474	-0.163254	-0.117284	-0.198843	0.00478571	-0.264223	0.308323	-0.0491942	0.225775	0.038744	-0.107416	-0.162066	-0.13931	0.222614	-0.114741	NA	0.396019	0.223539	0.821023	0.652873	0.679137	0.34896	0.630868
986	ARHGEF39	-0.173898	-0.353575	-0.297792	-0.355321	0.0878388	-0.338584	-0.0539057	-0.323959	-0.35321	0.296635	-0.404446	-0.166127	-0.172819	-0.182749	-0.318341	-0.3923	0.170732	0.00494575	-0.284846	-0.422303	-0.208374	-0.387209	NA	0.507107	0.324868	0.427128	0.730394	0.418693	0.678597	0.595158
987	ARHGEF4	0.0637839	0.125117	0.290286	0.116771	0.126498	0.295894	-0.0515618	0.310223	0.281565	-0.0271339	-0.0759897	-0.0239112	0.175297	0.0399659	0.323813	-0.0902718	0.148452	0.104544	0.139178	0.111055	0.420613	0.15996	NA	0.891638	0.531409	0.490797	0.712155	0.814253	0.344257	0.580374
988	ARHGEF40	-0.231034	-0.161654	-0.381099	-0.0261919	-0.000605797	-0.245251	-0.183124	-0.43452	-0.0559814	-0.451913	0.0856642	-0.125565	-0.329691	-0.237845	0.040746	-0.0931299	-0.0969283	0.0957167	-0.205879	-0.117429	-0.205158	-0.55704	NA	0.418084	0.371407	0.527244	0.195591	0.183513	0.361391	0.556969
989	ARHGEF5	-0.328318	-0.213309	-0.263973	-0.0255349	-0.0824732	-0.0440955	-0.270761	-0.205523	0.117332	-0.251188	-0.290334	-0.62259	-0.128647	-0.233716	-0.0510205	-4.93198e-05	-0.164622	-0.000324718	-0.311579	-0.115039	-0.217768	-0.310177	NA	0.259448	0.289252	0.610834	0.329036	0.150129	0.420537	0.266373
990	ARHGEF6	0.0450585	0.032923	0.244182	0.0468253	0.00955173	0.156769	0.264384	0.316667	-0.00312953	0.183719	0.345049	0.0129537	0.064544	0.0576778	-0.0408336	0.134484	-0.0689775	0.0880809	0.133317	-0.0674706	0.443129	0.0452361	NA	0.833961	0.493035	0.353596	0.951931	0.544726	0.536331	0.564368
991	ARHGEF7	-0.224374	-0.216911	0.135032	-0.2282	-0.64366	-0.267551	0.0531935	0.0359082	-0.571009	-0.276271	0.382658	0.0417826	-0.333143	-0.381762	-0.274866	-0.181534	-0.479901	-0.807419	-0.193758	-0.240065	0.116364	0.1537	NA	0.343667	0.446684	0.394695	0.521109	0.960493	0.48627	0.39906
992	ARHGEF9	0.0899457	0.00816318	0.100763	-0.070134	-0.00303463	-0.0442386	0.0195633	-0.140227	0.0517494	0.111833	-0.0727061	0.0860062	0.0153632	0.168468	-0.159441	0.0191732	-0.179235	0.173166	-0.106048	0.122374	0.365624	-0.164097	NA	0.355744	0.184479	0.605548	0.186689	0.456745	0.302936	0.329607
993	ARID1A	-0.222661	-0.052043	-0.0249545	-0.0587721	-0.290809	0.0951598	0.221382	-0.223925	0.414244	0.345921	0.0968418	-0.160267	-0.166643	-0.341075	-0.127742	0.0101982	-0.43429	-0.147328	-0.100939	-0.00314682	0.213774	-0.263683	NA	0.961499	0.500498	0.346787	0.395931	0.664943	0.202698	0.330441
994	ARID1B	0.151	0.00174652	0.155904	0.257538	0.042218	-0.130037	0.388128	0.0400132	-0.300087	0.281311	0.494944	0.0304617	0.225651	0.196889	0.0390059	0.47607	-0.0603444	0.144781	0.0464246	-0.0429315	-0.131287	0.443095	NA	0.371821	0.919352	1.29243	0.604484	0.421309	0.41899	1.01983
995	ARID2	-0.278473	-0.600272	-0.530905	-0.576848	-0.448194	-0.525589	-0.525556	-0.536343	-0.514835	-0.362064	-0.689047	-0.288604	-0.178246	-0.368569	-0.828812	-0.324884	-0.222313	-0.674074	-0.5799	-0.620644	-0.737665	-0.324145	NA	0.916795	0.650637	0.742321	1.11731	0.897755	1.27617	0.651578
996	ARID3A	-0.0522756	-0.0825898	-0.200047	-0.32945	0.0829561	-0.266021	-0.205539	-0.175456	-0.356586	-0.0837754	-0.327303	-0.294377	0.268265	-0.130714	-0.262363	-0.396538	0.0712452	0.0946669	-0.207907	0.0427277	-0.118818	-0.281276	NA	0.229752	0.311055	0.286509	1.01895	0.523959	0.336082	0.216229
997	ARID3B	-0.213874	-0.185962	-0.181132	-0.435238	-0.180416	-0.108783	-0.0114137	-0.151153	-0.0664139	-0.240876	0.218049	-0.04156	-0.529423	-0.0706394	-0.495625	-0.37485	-0.325	-0.0358325	-0.281321	-0.0906036	-0.212855	-0.149409	NA	0.271285	0.631444	0.563837	1.17776	0.522474	0.591853	0.43328
998	ARID3C	0.0499511	-0.213923	-0.555537	-0.1777	-0.299199	-0.0184656	-0.224723	0.157958	-0.19489	-0.336623	-0.112822	-0.109007	0.208025	0.0508361	0.0798705	-0.43527	-0.256019	-0.342379	-0.420399	-0.00744841	-0.386202	-0.724871	NA	0.202116	0.308247	0.361511	0.217882	0.590693	0.357105	0.56982
999	ARID4A	-0.187588	0.203839	-0.434494	-0.290272	-0.0824484	-0.142504	-0.548821	-0.487232	0.202224	-0.311346	-0.786296	-0.437469	-0.180704	0.0554084	-0.235658	-0.344886	-0.162692	-0.00220429	0.216047	0.191632	-0.746333	-0.122654	NA	0.272195	0.489314	0.306273	0.494803	0.276963	0.745585	0.364561
1000	ARID4B	-0.214692	0.108914	-0.124768	-0.282356	-0.00222176	0.112384	0.0931993	0.215945	0.00882386	-0.275609	0.462008	-0.331154	-0.111803	-0.201119	-0.275241	-0.289472	-0.0950406	0.090597	0.193776	0.0240513	-0.216787	-0.0327491	NA	0.502089	0.390112	0.383	0.62616	0.227517	0.463189	0.205997
1001	ARID5A	-0.537585	-0.869057	-0.455911	-0.536604	-0.891655	-2.06697	-1.28766	-2.29402	-1.83992	-1.35465	-1.22068	-0.598395	-0.507668	-0.506692	-0.694901	-0.378308	-1.02834	-0.754973	-0.945793	-0.792321	-0.192208	-0.719613	NA	2.99704	1.84956	1.03858	0.92155	1.61336	1.68363	0.446018
1002	ARID5B	0.0053122	-0.0961456	-0.52544	-0.273953	-0.0682811	0.140897	0.143218	0.0813732	0.200422	0.0837925	0.202644	-0.150426	-0.0652583	0.231621	-0.0859004	-0.462006	0.135312	-0.271874	0.0491104	-0.241402	-0.285033	-0.765848	NA	0.51019	0.254012	0.267606	0.374317	0.422319	0.283104	0.67098
1003	ARIH1	-1.20426	-1.29591	-1.08073	-1.76436	-1.57127	-1.31739	-1.76563	-1.40892	-1.22587	-2.41057	-1.12069	-0.874023	-1.52285	-1.21589	-1.99277	-1.53594	-0.802885	-2.33965	-1.58299	-1.00883	-0.978748	-1.18271	NA	1.70726	2.09243	2.77211	2.49469	1.56991	2.12517	1.72754
1004	ARIH2	0.0131276	0.0421334	0.100145	0.183724	0.00143359	-0.0943828	0.569544	-0.0868415	-0.101924	0.720763	0.418325	-0.0231972	0.11016	-0.0475798	0.290564	0.0768835	0.105609	-0.102742	-0.0414466	0.125714	0.220348	-0.0200572	NA	0.100888	1.126	0.732828	1.02161	0.364476	0.384997	0.769692
1005	ARIH2OS	-0.0777673	-0.0570651	-0.166653	-0.373463	-0.081406	-0.401374	-0.150753	-0.292564	-0.510185	-0.238378	-0.0631286	-0.129404	0.129476	-0.233373	-0.575543	-0.171384	0.140197	-0.303009	-0.111071	-0.00305888	-0.323976	-0.00932951	NA	0.502186	0.405	0.29243	0.506103	0.739565	0.201184	0.337167
1006	ARL1	-0.131734	-0.225837	-0.11914	-0.128448	-0.195496	-0.343694	-0.201058	-0.270926	-0.416461	-0.0714643	-0.330653	-0.107934	-0.118457	-0.16881	-0.137987	-0.11891	-0.082772	-0.30822	-0.261597	-0.190077	-0.141647	-0.0966326	NA	0.420508	0.265728	0.353596	0.150912	0.2114	0.402244	0.356296
1007	ARL10	0.0583166	0.0164411	-0.0587212	-0.427112	-0.100349	-0.129012	0.140153	0.135163	-0.393186	0.487064	-0.206757	0.21953	0.0310544	-0.0756347	-0.487514	-0.366709	-0.224669	0.0239706	0.0264484	0.00643379	-0.0342811	-0.0831613	NA	0.253985	0.742335	0.59176	0.982508	0.352563	0.383672	0.277494
1008	ARL11	0.213069	0.321018	0.462142	0.129911	-0.16917	0.0726876	0.411832	-0.283516	0.428892	0.629164	0.1945	0.198128	0.281365	0.159713	0.186415	0.0734068	-0.499441	0.161102	0.371016	0.271021	0.528789	0.395495	NA	0.30673	0.87589	0.896196	0.414207	0.400095	1.18037	1.45866
1009	ARL13A	0.0384277	0.155524	-0.0753606	0.206407	-0.117738	0.087518	0.365998	0.00447369	0.170562	0.402258	0.329738	0.0863995	-0.0156614	0.0445449	0.131838	0.280976	-0.17091	-0.0645659	0.207479	0.103569	-0.69255	0.541829	NA	0.373649	0.850612	0.560667	0.873203	0.497962	0.636473	0.479093
1010	ARL13B	-0.106686	-0.150622	-0.0125467	-0.168408	-0.0181971	-0.00662364	0.0399548	-0.32037	0.307123	-0.0986041	0.178514	-0.107269	-0.167849	-0.0449417	-0.184477	-0.152338	0.0111856	-0.0475798	-0.0904315	-0.210813	-0.01496	-0.0101333	NA	0.40976	0.196403	0.134304	0.329253	0.339481	0.382821	0.169068
1011	ARL14	0.0294814	-0.126364	0.0531295	0.22101	-0.0983559	0.184832	0.0317577	0.313468	0.0561952	0.511119	-0.447604	-0.00190282	0.0821834	0.00816372	0.175408	0.266613	-0.132356	-0.0643555	-0.314782	0.0620549	0.0848881	0.021371	NA	0.314218	0.411756	0.232844	1.02377	0.158747	0.950414	0.524867
1012	ARL14EP	-0.0183268	-0.245088	-0.0205327	-0.165252	-0.353012	0.119732	-0.406098	0.0585317	0.180932	-0.733443	-0.0787528	-0.0975677	-0.0731073	0.115695	-0.0716725	-0.258832	-0.531773	-0.174251	-0.179839	-0.310337	-0.123972	0.0829065	NA	0.527536	0.334407	0.210419	0.267755	0.518163	0.377745	0.187153
1013	ARL14EPL	-0.0153839	0.147554	0.0709836	0.0992525	0.000146027	0.125373	0.211902	0.254931	-0.00418573	0.66866	-0.244855	0.160892	-0.0339097	-0.173134	-0.0584811	0.256986	0.126983	-0.126691	0.00423898	0.29087	0.272324	-0.130357	NA	0.377688	0.321969	0.335358	0.769348	0.290811	0.551325	0.375496
1014	ARL15	-0.1484	0.00325285	-0.137406	-0.191096	-0.159872	-0.124635	0.30651	-0.479503	0.230233	0.426298	0.186723	-0.464691	0.113778	-0.0942873	0.0704008	-0.452592	-0.0217751	-0.297968	-0.195101	0.201606	-0.302839	0.028027	NA	0.434471	0.932501	0.330683	0.356134	0.520389	0.248394	0.206276
1015	ARL16	0.0773906	0.136385	-0.446261	0.180325	0.0159467	-0.121291	-0.179248	0.0621552	-0.304738	-0.355387	-0.0031096	0.0137204	0.212557	0.00589434	0.0342561	0.326393	-0.0955994	0.127493	0.0476976	0.225073	-0.189441	-0.703082	NA	0.206901	0.521232	0.326979	0.423095	0.341002	0.57028	0.719153
1016	ARL17A	-0.787174	-0.92825	-0.919667	-0.620149	-0.721257	-0.472133	-0.559611	-0.185881	-0.758385	-1.14366	0.0244426	-0.462884	-0.699395	-1.19924	-0.619745	-0.620554	-0.695748	-0.746766	-0.876128	-0.980373	-0.658192	-1.18114	NA	0.397674	0.452722	1.58503	1.32324	1.33042	2.19096	1.56992
1017	ARL17B	-0.258077	-0.106293	-0.225567	-0.33965	-0.0200659	-0.113522	0.00846796	-0.180045	-0.0469983	-0.229226	0.246162	-0.381604	-0.176529	-0.216098	-0.228632	-0.450668	0.378726	-0.418858	-0.139516	-0.0730712	-0.209967	-0.241167	NA	0.782556	0.319297	0.603801	0.947404	0.754958	0.487689	0.338741
1018	ARL2	-1.64806	-1.33255	-0.773081	-1.85165	-1.99518	-1.43185	-1.57387	-1.10536	-1.75833	-2.37259	-0.775154	-1.31939	-2.0405	-1.5843	-1.84337	-1.85993	-1.64326	-2.34711	-1.22417	-1.44092	-0.388218	-1.15794	essential_DepMap	2.33722	2.19443	4.18842	3.71038	2.85616	2.28025	1.05393
1019	ARL2BP	-0.174542	-0.276915	0.223085	0.141424	-0.154321	0.0275258	-0.261489	-0.234348	0.289399	-0.127237	-0.395741	-0.0448509	-0.279954	-0.198822	0.0658179	0.217031	0.0773472	-0.38599	-0.192883	-0.360947	0.161891	0.284278	NA	0.311874	0.247525	0.354578	0.902354	0.625242	0.485459	0.71193
1020	ARL3	-0.065723	0.0539412	0.124496	-0.041631	-0.29442	0.254671	-0.0947628	0.329395	0.179947	-0.18222	-0.00730605	-0.134558	-0.0634739	0.000862766	-0.00974565	-0.0735164	-0.45029	-0.138551	0.240304	-0.132421	-0.20367	0.452661	NA	0.648958	0.437715	0.308919	0.217194	0.416104	0.448343	0.430847
1021	ARL4A	-0.127501	-0.132025	-0.0413809	-0.180366	-0.0864572	-0.27296	-0.545933	0.0252328	-0.571153	-0.664109	-0.427758	-0.15448	-0.0438174	-0.184206	-0.276826	-0.0839052	-0.135536	-0.0373786	-0.389749	0.125699	-0.251286	0.168524	NA	0.525995	0.823735	0.388277	0.378967	0.293295	0.671531	0.361007
1022	ARL4C	-0.0648317	-0.335567	0.0989574	-0.330014	0.00163269	0.293382	-0.295971	0.474562	0.112201	-0.177885	-0.414057	-0.0618345	0.0833165	-0.215977	-0.27048	-0.389548	0.27529	-0.272024	-0.131523	-0.53961	-0.0823086	0.280223	NA	0.506899	0.263607	0.189767	0.429054	0.391153	0.396488	0.328452
1023	ARL4D	0.198401	-0.124286	0.0231107	-0.164175	0.109905	0.0474988	-0.126994	0.00988018	0.0851174	-0.0275557	-0.226431	0.171766	0.255787	0.167649	-0.387394	0.0590432	0.18595	0.03386	-0.0223644	-0.226207	0.103884	-0.057663	NA	0.212731	0.287666	0.600326	0.398336	0.370947	0.340117	0.246689
1024	ARL5A	-0.128471	-0.054131	0.143269	0.0646618	0.0696577	-0.0341245	-0.0375829	-0.357636	0.289387	0.0261938	-0.10136	-0.144212	-0.15345	-0.0877517	0.0683686	0.0609551	0.0996026	0.0397128	-0.00720602	-0.101056	0.107325	0.179213	NA	0.341159	0.247637	0.402305	0.8131	0.328739	0.254589	0.655077
1025	ARL5B	0.0325295	0.321282	-0.125917	0.112108	-0.0124944	0.185101	-0.0656874	0.242272	0.12793	-0.129836	-0.00153899	-0.172928	0.0200017	0.250514	0.0572838	0.166932	-0.0452144	0.0202256	0.291475	0.351089	-0.0721703	-0.179664	NA	0.471456	0.381371	0.369572	0.538199	0.629381	1.00918	0.297178
1026	ARL5C	-0.183374	-0.351552	-0.271963	-0.167831	-0.151686	-0.135565	-0.407376	-0.34977	0.0786409	-0.498576	-0.316176	-0.36751	-0.158837	-0.0237741	-0.15344	-0.182222	-0.10813	-0.195242	-0.343781	-0.359324	-0.254079	-0.289846	NA	0.252744	0.441778	0.542118	0.265128	0.155554	0.66984	0.303718
1027	ARL6	-0.103291	-0.010979	0.217656	-0.157413	-0.0270562	0.223268	-0.0255449	0.480926	-0.03439	0.170403	-0.221493	0.104368	-0.27843	-0.13581	-0.231063	-0.0837628	0.0185337	-0.0726461	-0.0342829	0.0123249	0.226201	0.20911	NA	0.403364	0.294551	0.240332	0.431452	0.328392	0.195844	0.734569
1028	ARL6IP1	-0.00529191	-0.024921	-0.143212	-0.00683405	-0.142017	-0.32506	0.311391	-0.342546	-0.307573	0.361712	0.26107	0.270234	-0.077975	-0.208135	0.0983689	-0.112037	-0.0027695	-0.281264	0.0997362	-0.149578	-0.0552022	-0.231221	NA	0.291566	0.516841	0.473661	0.36809	0.379515	0.388378	0.428454
1029	ARL6IP4	0.304794	0.285944	0.219021	0.346719	0.20591	0.0760879	-0.0209424	-0.0418054	0.193981	-0.252005	0.21012	0.221384	0.270312	0.422685	0.403438	0.29	0.334161	0.0776583	0.427384	0.144504	0.213142	0.224899	NA	0.48359	0.257915	1.42251	2.05292	0.787627	1.02345	0.785978
1030	ARL6IP5	0.113179	0.179477	0.138689	0.0274192	0.0295342	-0.030086	-0.0194819	-0.0636837	0.00351164	0.238547	-0.277511	0.109241	0.0724029	0.157893	-0.0149334	0.0697717	0.095794	-0.0367256	-0.020443	0.379397	0.0416216	0.235756	NA	0.129438	0.296605	0.742321	0.264449	0.167903	0.659468	0.552423
1031	ARL6IP6	-0.37705	-0.315821	-0.290916	-0.14935	0.0538998	-0.376982	-0.558976	-0.219063	-0.534902	-0.508795	-0.609158	-0.470431	-0.574522	-0.0861974	0.0563303	-0.35503	-0.0597549	0.167554	-0.335248	-0.296394	-0.47992	-0.101911	NA	0.547049	0.809304	0.543634	0.365951	0.431822	0.613029	0.561537
1032	ARL8A	-0.226956	-0.290353	-0.273907	-0.246161	0.0260892	-0.500078	-1.3818	-0.585053	-0.415103	-0.00157089	-2.76203	-0.186249	-0.116645	-0.377976	0.0137672	-0.506089	-0.133826	0.186004	-0.171816	-0.408889	-0.197989	-0.349826	NA	0.738309	0.523602	0.435334	0.466871	0.52984	0.654283	0.503929
1033	ARL8B	-0.221165	-0.135716	-0.0525312	0.00139953	-0.00590096	-0.530886	0.151034	-1.0961	0.0343227	0.136853	0.165216	-0.274649	-0.361179	-0.0276663	0.109883	-0.107084	-0.120674	0.108872	0.142899	-0.41433	0.0466605	-0.151723	NA	0.481657	0.260096	0.286509	0.559886	0.387015	0.661968	0.192232
1034	ARL9	0.0353405	-0.0116391	0.0187747	-0.0643898	-0.0608931	-0.162918	-0.0731052	-0.421058	0.0952228	0.22425	-0.370461	0.084446	0.105813	-0.0842376	0.134406	-0.263186	-0.0947301	-0.0270561	-0.105311	0.0820326	0.168215	-0.130665	NA	0.406487	0.231569	0.476254	0.318216	0.479169	0.221798	0.273326
1035	ARMC1	-0.0391825	-0.0521398	-0.000540502	0.037014	-0.0685979	0.196599	0.139318	-0.0638339	0.457033	-0.0917594	0.370395	-0.0738319	0.148997	-0.192712	0.0665211	0.00750697	-0.223381	0.0861855	-0.0793173	-0.0249622	-0.137219	0.136138	NA	0.357674	0.389379	0.270026	0.280089	0.159596	0.30918	0.33556
1036	ARMC10	0.0411799	-0.268361	-0.277728	-0.0406169	-0.131031	-0.0665935	-0.153155	0.113766	-0.246953	-0.155907	-0.150402	0.00922673	-0.135685	0.249997	0.031026	-0.11226	-0.678113	0.416052	-0.327897	-0.208825	-0.391868	-0.163588	NA	0.476442	0.517755	0.511449	0.317598	0.354284	0.474366	0.628627
1037	ARMC12	-0.116905	-0.142978	-0.126824	-0.100659	-0.0595723	0.0563568	0.0783362	-0.0612252	0.173939	-0.0325949	0.189267	-0.0153879	-0.161494	-0.173832	0.0269854	-0.228303	-0.00631727	-0.112827	-0.276103	-0.00985304	0.177838	-0.431486	NA	0.392454	0.340374	0.321482	0.354946	0.337625	0.346609	0.21732
1038	ARMC2	-0.0241781	-0.00438969	0.113787	-0.136052	-0.013787	-0.0418591	-0.142997	0.0092541	-0.0929722	-0.224463	-0.0615321	-0.142892	0.13049	-0.0601318	-0.0816744	-0.19043	0.0318968	-0.0594708	-0.0710058	0.0622265	0.0463785	0.181196	NA	0.373793	0.706648	0.213959	0.30529	0.246674	0.23844	0.491208
1039	ARMC3	-0.00485024	-0.156136	-0.0134937	0.113885	0.261977	0.217683	0.0388137	0.183277	0.25209	-0.0823481	0.159975	0.0358688	0.203479	-0.253898	0.141254	0.0865161	0.187664	0.336291	-0.222253	-0.0900195	0.0402379	-0.0672253	NA	0.687273	0.220075	0.365523	0.515786	0.777401	0.281793	0.599948
1040	ARMC4	-0.0146501	0.206966	-0.35581	0.0911278	0.0444986	0.0616725	-0.082732	0.212046	-0.0887013	-0.0949222	-0.0705418	-0.0110469	-0.155789	0.122885	0.0147088	0.167547	0.300327	-0.21133	0.214879	0.199054	-0.316379	-0.395242	NA	0.413683	0.273664	0.197911	0.382104	0.289435	1.32085	0.542058
1041	ARMC5	-0.603645	-0.214366	-0.867083	-0.652717	-0.713078	-0.809389	-1.23112	-1.14851	-0.470268	-0.744494	-1.71774	-0.83802	-0.331288	-0.641626	-0.779526	-0.525908	-0.839771	-0.586386	-0.0688285	-0.359903	-0.842516	-0.89165	NA	0.841935	1.12607	1.20273	1.23826	1.47771	0.701474	1.40338
1042	ARMC6	-0.149063	-0.013614	-0.307647	0.0537995	0.0416383	-0.492007	-0.111684	-0.571362	-0.412652	-0.180111	-0.043258	-0.292971	-0.101002	-0.0532154	0.134627	-0.0270279	0.0639675	0.0193091	0.178801	-0.206029	-0.338435	-0.276859	NA	0.606855	0.217649	0.352617	0.3126	0.656956	0.501001	0.385905
1043	ARMC7	-1.37421	-1.68913	-1.24955	-1.18793	-2.16519	-1.12573	-1.19299	-1.35995	-0.891509	-1.37527	-1.01071	-1.70682	-1.26237	-1.15345	-0.976192	-1.39967	-2.65833	-1.67206	-1.48716	-1.8911	-1.49569	-1.00341	essential_DepMap	1.57618	3.36753	4.02228	3.50597	3.13824	4.92922	2.96212
1044	ARMC8	0.0296081	0.1204	-0.0239163	0.0843857	0.185305	0.0264135	-0.06293	0.256319	-0.203492	-0.228984	0.103124	-0.138852	0.152588	0.0750875	0.0659371	0.102834	0.186297	0.184313	0.148278	0.0925221	-0.0992262	0.0513935	NA	0.618488	1.31295	0.454693	0.470505	0.67389	0.636181	0.14277
1045	ARMC9	-0.131862	-0.0348805	0.120735	0.0333356	0.0394596	0.00596779	-0.0874411	-0.0682313	0.0801669	-0.260597	0.0857145	-0.0261767	-0.267085	-0.102323	-0.0865362	0.153208	-0.0625704	0.14149	-0.0221161	-0.047645	0.330367	-0.088898	NA	0.238343	0.403609	0.261219	0.284632	0.376162	0.328281	0.307457
1046	ARMCX1	0.0102603	-0.117386	0.0851605	0.282528	0.095484	-0.0556674	0.15837	0.282176	-0.393511	0.269295	0.0474448	0.123756	0.0849598	-0.177935	0.333229	0.231827	0.0926436	0.0983244	-0.396659	0.161887	0.0164534	0.153868	NA	0.566814	0.627843	0.424812	0.888822	0.347618	0.368871	0.627659
1047	ARMCX2	0.0757351	0.0989538	0.0333175	-0.027836	0.224732	-0.0733861	0.352051	-0.377967	0.231194	0.469398	0.234704	-0.0218357	0.229573	0.0194676	0.149907	-0.205579	0.173559	0.275905	-0.0181635	0.216071	-0.159777	0.226412	NA	1.01125	0.722471	0.482804	0.410749	0.824613	0.70058	0.239841
1048	ARMCX3	0.0379519	0.0098132	0.106899	-0.0342249	0.00148304	-0.332973	0.0768371	-0.39871	-0.267236	-0.0169039	0.170578	-0.11909	0.222649	0.0102968	-0.0830565	0.0146066	-0.258942	0.261908	0.119279	-0.0996523	0.263917	-0.0501186	NA	0.417766	0.613965	0.401209	0.206025	0.874047	0.638348	0.321957
1049	ARMCX4	0.109534	-0.372315	-0.0927503	0.233383	0.00252446	-0.227334	0.25347	0.081075	-0.535743	0.639156	-0.132216	0.116802	0.238373	-0.0265745	0.2043	0.262466	0.0958188	-0.0907699	-0.0439611	-0.700669	-0.161704	-0.0237971	NA	0.206797	0.413657	0.524329	0.893855	0.320213	0.450116	0.283066
1050	ARMCX5	-0.0477419	-0.123491	0.201907	-0.0250903	-0.0419544	-0.130154	0.0320194	0.346137	-0.606444	-0.185846	0.249885	-0.261821	0.11177	0.00682559	-0.138237	0.0880566	0.0165715	-0.10048	-0.239732	-0.00725035	0.328263	0.0755513	NA	0.364396	0.471366	0.341989	0.435287	0.482606	0.287026	0.429463
1051	ARMCX5-GPRASP2	0.148225	0.0334991	0.126649	0.158508	0.0788191	0.349823	-0.185761	0.481465	0.218181	-0.496506	0.124983	-0.0115556	0.380807	0.0754232	0.0292262	0.28779	-0.01212	0.169758	0.303652	-0.236654	0.321151	-0.0678541	NA	0.952852	0.277341	0.603801	0.387792	0.421974	0.299833	0.596251
1052	ARMCX6	0.150649	0.0202419	-0.0740043	-0.065244	-0.358233	0.0317017	-0.19081	0.0936539	-0.0302506	-0.236494	-0.145126	0.355448	0.161256	-0.0647565	-0.138172	0.00768354	-0.326565	-0.389902	0.013215	0.0272689	-0.211706	0.0636973	NA	0.485412	0.285297	0.534617	0.41424	0.697463	0.335438	0.227315
1053	ARMS2	0.107959	-0.115632	-0.000669228	0.024186	0.0690151	0.0116685	-0.101367	-0.160803	0.18414	-0.309042	0.106309	-0.0405652	0.266264	0.0981774	-0.0427717	0.0911437	0.257406	-0.119376	0.00694863	-0.238213	-0.141282	0.139943	NA	0.497812	0.236722	0.388277	0.239875	0.542179	0.278721	0.25702
1054	ARMT1	0.0283458	0.211724	0.101111	0.197613	0.00400135	0.149174	0.268887	0.194342	0.104006	0.360015	0.177759	-0.0466244	0.0726547	0.0590072	0.154752	0.240473	0.121018	-0.113015	0.256964	0.166484	0.154759	0.0474638	NA	0.399446	0.908984	0.449772	1.50808	0.32015	0.800917	0.262696
1055	ARNT	-0.235623	-0.269522	-1.01001	-0.45135	0.0166169	-0.611841	-0.381818	-0.562338	-0.661345	-0.1274	-0.636236	-0.362963	-0.250943	-0.0929619	-0.34709	-0.55561	-0.205071	0.238305	-0.241614	-0.297431	-0.833952	-1.18608	NA	0.743607	0.368272	0.454693	0.67745	0.249048	0.263914	1.413
1056	ARNT2	-0.0693425	-0.0513489	-0.00960701	0.0507254	0.125171	0.173673	0.0992357	0.0637376	0.283608	0.375829	-0.177358	-0.0432174	-0.0429653	-0.121845	-0.0200032	0.121454	0.294908	-0.0445655	-0.384909	0.282211	0.167014	-0.186228	NA	0.490253	0.358303	0.361511	0.354465	0.632163	0.407662	0.318578
1057	ARNTL	-0.159141	-0.0296209	-0.00643356	0.0672272	-0.0823937	-0.257311	-0.354031	0.187084	-0.701706	-0.275453	-0.43261	-0.229799	0.0345531	-0.282178	0.248579	-0.114125	-0.218389	0.0536013	-0.169382	0.11014	0.160889	-0.173756	NA	0.604586	0.409414	0.455932	0.697812	0.215283	0.303561	0.266273
1058	ARNTL2	0.0564565	0.507492	0.193127	0.239947	0.110264	0.234134	-0.140887	0.105992	0.362276	0.0735275	-0.355301	-0.174755	-0.0727534	0.416877	0.333068	0.146826	0.117226	0.103302	0.533839	0.481145	-0.125439	0.511693	NA	0.523009	0.233026	0.504456	2.0062	0.500705	1.84695	0.951333
1059	ARPC1A	-0.092719	-0.174149	-0.165761	0.230626	-0.114905	-0.460669	0.33759	0.222768	-1.14411	0.449109	0.226071	-0.149226	-0.245848	0.116917	0.323157	0.138095	0.228606	-0.458415	0.114998	-0.463295	-0.223935	-0.107586	NA	1.00451	0.874096	0.274905	0.71653	0.756825	0.309458	0.39552
1060	ARPC1B	0.211153	0.218258	0.371657	0.0688065	0.0879493	0.176808	0.428886	0.0858337	0.267783	0.652799	0.204973	0.336926	0.0858146	0.21072	-0.0995173	0.23713	-0.144204	0.320103	0.132848	0.303669	0.304338	0.438975	NA	0.37803	1.46038	0.542118	0.447216	0.495837	0.581049	0.894514
1061	ARPC2	-0.508983	-0.17022	-0.531244	-0.457952	-0.723446	-0.29756	-0.314652	-0.352155	-0.242964	-0.199979	-0.429325	-0.477805	-0.53636	-0.512782	-0.454063	-0.461841	-0.602314	-0.844577	-0.273851	-0.0665896	-0.776305	-0.286182	NA	0.347029	0.40045	1.42597	1.31706	1.70357	0.567292	0.985116
1062	ARPC3	-0.784822	-0.440979	-0.678145	-0.847579	-0.782401	-0.445783	-0.637563	-0.337788	-0.553779	-0.545847	-0.729279	-0.678321	-0.89103	-0.785114	-0.73918	-0.955977	-0.658822	-0.90598	-0.469423	-0.412536	-0.481659	-0.874631	NA	0.66309	0.8282	1.88273	1.74897	1.68103	0.949732	0.928252
1063	ARPC4	-0.678549	-0.769226	-0.687903	-1.00629	-0.955907	-0.848611	-0.75673	-1.10374	-0.593479	-0.866297	-0.647162	-0.656379	-0.650082	-0.729185	-1.01123	-1.00134	-0.896817	-1.015	-0.63852	-0.899932	-0.64378	-0.732025	essential_DepMap	1.91047	1.40002	1.90309	2.85712	2.45497	1.87214	1.51039
1064	ARPC4-TTLL3	-0.190456	-0.103352	0.0944548	-0.20895	0.0555321	0.10499	0.336966	0.132721	0.0772591	0.404998	0.268934	-0.200717	0.0201276	-0.390779	-0.178881	-0.239019	-0.0693289	0.180393	0.00648909	-0.213194	-0.152378	0.341287	NA	0.526002	0.673024	0.316953	0.407551	0.311865	0.404372	0.445099
1065	ARPC5	0.0830404	-0.208856	-0.207139	-0.284849	-0.101836	-0.103713	-0.161137	0.0664551	-0.273881	0.102774	-0.425048	0.0601308	0.12715	0.0618405	-0.375529	-0.194169	-0.0339026	-0.169769	-0.0897139	-0.327998	-0.434717	0.0204387	NA	0.22889	0.397257	0.331614	0.322987	0.233565	0.317422	0.389995
1066	ARPC5L	-0.0533574	-0.211718	-0.00578105	-0.0101462	-0.0945814	0.318252	0.0330988	0.492221	0.144284	0.173493	-0.107296	-0.177068	-0.0776768	0.0946727	-0.00415619	-0.0161361	0.259546	-0.448709	-0.176306	-0.247129	-0.0860619	0.0744998	NA	0.597974	0.220876	0.294136	0.415906	0.280388	0.365926	0.242828
1067	ARPIN	0.0937617	0.125169	0.17062	0.0911423	0.0921754	0.0750484	0.262448	0.0503561	0.0997408	0.454284	0.0706122	0.045723	0.100088	0.135474	0.0324503	0.149834	0.12021	0.0641406	0.1563	0.0940379	0.249808	0.0914325	NA	0.388425	0.6758	0.607303	0.579136	0.415601	0.825818	0.383971
1068	ARPP19	-0.266294	-0.0481509	-0.0392227	-0.0737741	0.0286043	-0.158893	-0.465611	-0.47322	0.155434	-0.790014	-0.141209	-0.271089	-0.368853	-0.15894	-0.112089	-0.0354591	-0.0322429	0.0894515	0.00114534	-0.0974471	0.218029	-0.296475	NA	0.331567	0.974495	0.540608	0.299993	0.21435	0.164319	0.48639
1069	ARPP21	0.0267541	-0.134909	-0.0414301	-0.00207089	0.132848	0.00727301	0.0688274	0.0994789	-0.0849329	0.425092	-0.287437	0.159579	-0.0223374	-0.0569788	0.0749539	-0.0790956	0.163897	0.101799	-0.203634	-0.0661843	-0.120275	0.0374148	NA	0.260214	0.893877	0.223299	0.151592	0.419623	0.176604	0.324066
1070	ARR3	-0.0561114	-0.0988041	0.040088	-0.0553857	-0.160491	-0.245904	0.123609	-0.0758153	-0.415993	0.221589	0.0256287	-0.194009	-0.00676418	0.0324393	-0.0774295	-0.033342	-0.158507	-0.162474	-0.196255	-0.00135354	0.20037	-0.120194	NA	0.364732	0.257908	0.166853	0.145184	0.490273	0.210447	0.485784
1071	ARRB1	0.040845	-0.0710693	-0.0240135	0.0357746	0.107847	0.189185	-0.285123	0.227801	0.150568	-0.240541	-0.329704	-0.0221564	-0.0876276	0.232319	0.0878205	-0.0162713	0.203937	0.0117567	-0.0181719	-0.123967	-0.156988	0.108961	NA	0.481637	0.415465	0.336299	0.299591	0.773563	0.422968	0.193711
1072	ARRB2	0.139737	-0.246608	-0.137742	-0.239484	-0.098675	-0.187453	-0.167026	-0.109004	-0.265902	-0.788987	0.454935	-0.0686021	0.232277	0.255537	-0.47345	-0.00551773	0.0950447	-0.292395	-0.155715	-0.337501	-0.0676019	-0.207882	NA	0.297393	0.404658	0.645892	0.346378	0.396093	0.588019	0.397723
1073	ARRDC1	0.238241	0.199631	0.160555	0.224845	0.337097	-0.120661	0.00943133	-0.345654	0.104331	0.0980733	-0.0792107	0.192508	0.232913	0.289302	0.254426	0.195263	0.421158	0.253035	0.373324	0.025939	0.190386	0.130723	NA	0.393006	0.234958	1.01547	0.944819	1.12466	0.63929	0.421676
1074	ARRDC2	-0.254493	-0.275388	-0.887325	-0.230494	-0.375672	-0.402863	-0.380164	-0.870296	0.0645703	-0.31649	-0.443837	-0.305518	-0.21316	-0.244801	-0.253382	-0.207607	-0.301635	-0.449709	-0.142216	-0.40856	-0.792753	-0.981897	NA	0.503192	0.523205	0.787812	0.581227	0.681916	0.483108	1.42818
1075	ARRDC3	-0.0577127	0.108682	0.027524	-0.0229879	0.209708	-0.0940532	0.283506	0.129212	-0.317318	0.241551	0.325461	-0.0396471	-0.271631	0.13814	0.00255128	-0.0485271	0.143219	0.276196	0.0858382	0.131527	-0.150263	0.205311	NA	0.422548	0.737169	0.643974	0.189458	0.764648	0.706118	0.285335
1076	ARRDC4	0.10228	-0.0548454	0.074304	-0.0526096	-0.177675	0.14863	0.261228	0.342135	-0.0448739	0.244882	0.277574	0.0502433	0.0576261	0.19897	-0.0177428	-0.0874764	-0.393443	0.0380924	-0.168557	0.0588658	0.182783	-0.0341752	NA	0.466328	0.712232	0.435334	0.24718	0.343293	0.130724	0.311033
1077	ARRDC5	-0.0820472	-0.0131306	-0.103447	0.047998	-0.129143	-0.201891	-0.368352	-0.41294	0.0091567	-0.295937	-0.440768	-0.0481818	0.0187692	-0.216729	0.168495	-0.072499	-0.236769	-0.0215165	0.0304912	-0.0567524	-0.425328	0.218433	NA	0.277111	0.596905	0.242604	0.640408	0.370514	0.249291	0.241277
1078	ARSA	-0.093471	0.0689577	-0.150132	-0.131519	-0.0528488	-0.432912	-0.49927	0.0792404	-0.945063	-0.383762	-0.614779	-0.443436	-0.030898	0.193921	-0.261075	-0.00196305	-0.0527986	-0.052899	-0.0677165	0.205632	-0.393962	0.0936981	NA	0.39517	0.832935	0.258848	0.380646	0.171795	0.438893	0.375646
1079	ARSB	-0.0512111	-0.462397	-0.215773	-0.275643	-0.242943	-0.656928	-0.217989	-0.461856	-0.852	-0.351628	-0.0843502	-0.0563265	-0.0578195	-0.0394872	-0.250587	-0.300699	-0.287966	-0.19792	-0.559378	-0.365416	-0.289472	-0.142075	NA	1.0358	0.403942	0.306273	0.424402	0.56504	0.852888	0.368947
1080	ARSD	0.04947	0.200433	-0.0546584	-0.062258	0.0754041	-0.144451	0.101001	0.0417905	-0.330692	-0.0271954	0.229197	-0.0431848	-0.0307271	0.222322	-0.0758847	-0.0486312	0.0252608	0.125547	0.104569	0.296297	-0.0784117	-0.0309051	NA	0.216057	0.410469	0.381952	0.0824367	0.499085	0.773889	0.381265
1081	ARSE	0.0858138	0.0439153	-0.286899	-0.140645	0.0517099	0.135549	0.223091	-0.181778	0.452875	0.335438	0.110744	0.159899	0.00747586	0.0900668	-0.253876	-0.0274139	0.0656607	0.0377591	0.0726957	0.0151349	-0.231506	-0.342292	NA	0.624253	0.521571	0.443697	0.260428	0.278387	0.211934	0.367619
1082	ARSF	-0.0698289	-0.0958392	-0.110075	-0.199264	0.0290501	-0.456586	-0.0757971	-0.499788	-0.413385	0.0315645	-0.183159	-0.123064	-0.0689274	-0.0174957	-0.113976	-0.284552	0.156119	-0.0980183	-0.127728	-0.0639504	-0.163265	-0.0568858	NA	0.698818	0.363216	0.230623	0.35858	0.291231	0.231765	0.235264
1083	ARSG	0.0483753	-0.0631424	-0.33042	0.10402	0.0280439	-0.0428096	-0.100555	-0.0563347	-0.0292845	-0.147245	-0.0538646	-0.0254614	-0.0105233	0.18111	0.182595	0.0254448	-0.12815	0.184238	-0.0164849	-0.1098	-0.216969	-0.443872	NA	0.598901	0.28778	0.458421	0.428425	0.475403	0.220173	0.496039
1084	ARSH	-0.0193654	-0.228364	0.0492346	-0.0838085	-0.130072	-0.112794	-0.00488218	-0.113513	-0.112075	0.0777767	-0.087541	-0.0976484	0.0958933	-0.056341	-0.222678	0.055061	-0.082724	-0.177421	-0.147035	-0.309694	-0.0165249	0.114994	NA	0.72039	0.208738	0.380907	0.397913	0.227352	0.486722	0.407629
1085	ARSI	0.146019	0.261164	-0.203058	-0.121473	-0.122776	0.0723405	0.178347	-0.0474378	0.192119	0.193354	0.16334	0.0985738	0.276488	0.0629954	0.0754962	-0.318442	0.118393	-0.363945	0.426852	0.0954751	-0.283174	-0.122942	NA	0.567785	0.268935	0.651695	0.376348	0.257868	0.550016	0.577107
1086	ARSJ	-0.0551219	-0.113504	-0.00625504	-0.373633	-0.299642	-0.278729	0.0817076	-0.073733	-0.483726	-0.134451	0.297866	0.0372623	0.0178945	-0.220522	-0.350326	-0.39694	-0.316874	-0.28241	-0.302941	0.0759335	-0.101314	0.0888037	NA	0.542156	0.4967	0.195179	0.765069	0.419857	0.32569	0.209701
1087	ARSK	-0.0697801	-0.123532	-0.0470928	-0.0340357	0.150691	-0.122305	-0.00463476	-0.123525	-0.121085	-0.394486	0.385217	-0.0230758	-0.0701267	-0.116138	-0.0962318	0.0281604	0.222752	0.0786289	-0.00240854	-0.244655	-0.131183	0.0369974	NA	0.312467	0.351577	0.14813	0.217664	0.564546	0.397853	0.267807
1088	ART1	0.000419143	-0.168007	-0.18783	0.114498	-0.12687	0.123093	-0.280013	0.142949	0.103237	-1.18001	0.619982	-0.334947	0.0739203	0.262284	0.12235	0.106646	-0.0648878	-0.188852	-0.386629	0.0506145	-0.352194	-0.0234665	Nonessential_DepMap	0.389707	0.317211	0.294992	0.423267	0.725692	0.488284	0.319103
1089	ART3	-0.013754	-0.143171	-0.208318	-0.22489	-0.00566203	-0.211321	-0.31132	-0.285454	-0.137188	-0.165441	-0.4572	0.111155	-0.0202859	-0.132131	-0.437389	-0.0123908	0.20438	-0.215704	0.0316593	-0.318002	-0.126531	-0.290106	NA	0.492894	0.295644	0.361511	0.439617	0.415912	0.370545	0.328406
1090	ART4	-0.150354	-0.244684	0.0950071	0.0715536	-0.067543	-0.0658065	-0.226965	-0.738315	0.606702	-0.387918	-0.0660118	-0.273129	-0.199119	0.0211865	0.132136	0.0109715	-0.0579347	-0.0771514	-0.245992	-0.243375	0.0908146	0.0991996	NA	0.547548	0.72731	0.241088	0.588599	0.588549	0.398021	0.39717
1091	ART5	0.0674759	-0.00967942	0.0496275	0.0827509	0.0466308	-0.0333913	0.424769	0.0615474	-0.12833	0.216927	0.632612	-0.0867315	0.123048	0.166111	0.121486	0.0440158	0.069341	0.0239206	-0.0572816	0.0379228	-0.0702879	0.169543	NA	0.147767	0.907699	0.571865	0.767323	0.289637	0.0702465	0.263329
1092	ARTN	-0.0055949	0.00462842	-0.0379079	-0.166007	0.0701989	0.0815402	0.510225	0.0487163	0.114364	0.415994	0.604456	0.109575	-0.0825518	-0.0438076	-0.12456	-0.207454	0.253846	-0.113448	-0.192135	0.201392	0.232686	-0.308502	NA	0.245996	1.11615	0.567031	0.260317	0.343384	0.419417	0.454322
1093	ARV1	0.0856955	-0.155187	-0.110881	0.215277	0.0984687	0.136363	-0.0932716	0.25273	0.0199962	0.201471	-0.388014	-0.0662426	0.340923	-0.0175937	0.276768	0.153786	0.0800629	0.116874	0.146851	-0.457225	-0.163296	-0.0584663	NA	0.44236	0.354637	0.337242	0.830577	0.413936	0.458745	0.186933
1094	ARVCF	-0.0385021	0.123637	0.234286	-0.0130644	-0.106134	0.146081	0.45648	0.298871	-0.00670906	0.500278	0.412683	0.0438895	0.0477992	-0.207195	0.0573136	-0.0834425	0.0245529	-0.23682	0.211032	0.0362425	0.123528	0.345043	NA	0.367697	1.374	0.283997	0.309206	0.221321	0.385166	0.557369
1095	ARX	0.181153	-0.00299063	0.0253343	-0.00941581	0.266166	0.206645	0.116293	-0.0841993	0.49749	-0.074287	0.306873	0.114142	0.193447	0.235871	0.329927	-0.348759	0.2827	0.249632	-0.0328497	0.0268685	-0.140008	0.190676	NA	0.927636	0.531601	1.15366	1.00183	0.892741	1.48762	0.663594
1096	AS3MT	-0.165853	-0.0428235	0.0002345	-0.0497786	-0.292282	-0.299573	0.0524383	-0.365652	-0.233495	0.370023	-0.265147	-0.167261	-0.324913	-0.00538407	0.00768246	-0.10724	-0.148514	-0.436049	0.221558	-0.307205	0.510462	-0.509993	NA	0.262283	0.374703	0.432974	0.25288	0.537108	0.410726	0.3299
1097	ASAH1	0.191238	0.367044	0.0633936	0.0293514	-0.0322025	-0.0876598	0.0795751	0.0499089	-0.225229	-0.203761	0.362912	0.109361	0.27293	0.191423	0.0319915	0.0267113	0.198626	-0.263031	0.319404	0.414684	-0.161317	0.288104	NA	0.327934	0.322804	0.8041	0.24652	0.241304	1.45627	0.838902
1098	ASAH2	-0.158207	-0.324065	-0.252322	-0.0334227	-0.105275	0.040058	0.428429	0.0160263	0.0640897	0.510069	0.346789	-0.221378	-0.286911	0.033668	-0.210372	0.143526	-0.318501	0.107951	-0.396254	-0.251877	-0.0615965	-0.443048	NA	0.382397	0.933626	0.306273	0.902047	0.212129	0.555253	0.460153
1099	ASAH2B	-0.607132	-0.445921	-0.272892	-0.489885	-0.190301	-0.732641	-1.14667	-0.280719	-1.18456	-0.441687	-1.85165	-0.632211	-0.319473	-0.869712	-0.51503	-0.46474	-0.122384	-0.258219	-0.399017	-0.492826	-0.209314	-0.33647	NA	1.16247	0.730945	1.09637	1.00015	0.213927	0.89817	0.325148
1100	ASAP1	-0.337314	0.202372	-0.771671	-0.156976	0.156714	-0.30475	0.225237	0.056915	-0.666415	0.308908	0.141567	-0.343001	-0.0377497	-0.631193	-0.238572	-0.075379	0.281247	0.0321812	0.192727	0.212017	-0.910397	-0.632944	NA	0.468304	0.5199	0.498941	0.382884	0.823251	0.534045	1.34225
1101	ASAP2	-0.112546	0.248841	-0.28568	-0.0877604	-0.0962324	-0.0649913	0.38645	0.244783	-0.374766	0.168178	0.604721	-0.0062545	-0.218686	-0.112697	0.0113655	-0.186886	-0.0250791	-0.167386	0.298987	0.198696	-0.171745	-0.399616	NA	0.251738	0.855211	0.341035	0.191897	0.447575	0.758885	0.425228
1102	ASAP3	-0.203395	-0.326766	0.0999394	0.104916	0.200928	-0.130975	0.0404094	-0.0406863	-0.221263	-0.00348693	0.0843057	-0.192496	-0.242104	-0.175585	0.221612	-0.0117795	0.211645	0.190212	-0.073144	-0.580388	0.155814	0.0440654	NA	0.140901	0.606732	0.341989	0.336959	0.621257	0.387354	0.388441
1103	ASB1	-0.0179027	0.0465876	-0.0248298	-0.0477753	-0.108045	-0.0746414	0.10041	0.00499083	-0.154274	-0.115908	0.316728	0.225311	-0.216533	-0.0624858	-0.0196838	-0.0758667	0.0423787	-0.258469	0.145536	-0.0523605	0.015054	-0.0647136	NA	0.322179	0.571868	0.258848	0.254777	0.298657	0.399735	0.219787
1104	ASB10	0.197531	0.200149	0.149363	-0.045198	0.0484433	0.262261	0.167029	0.571226	-0.0467039	0.447116	-0.113058	0.0995939	0.219978	0.27302	-0.10907	0.018674	0.0186993	0.0781874	0.370225	0.0300718	0.105665	0.193061	NA	0.418321	0.342703	0.764472	0.146208	0.187662	0.53918	0.457486
1105	ASB11	0.0463806	-0.249923	0.155682	-0.0379295	0.372063	0.145953	-0.195978	0.0478793	0.244027	-0.651042	0.259086	0.0508367	0.00683244	0.0814727	0.0394647	-0.115324	0.410768	0.333358	-0.475913	-0.0239333	0.0380083	0.273356	NA	0.895322	0.291091	0.230623	0.323617	1.29651	0.43164	0.31981
1106	ASB12	0.154978	-0.12592	0.0822041	-0.181153	-0.05381	-0.0782802	-0.0244008	0.235977	-0.392538	0.0935284	-0.14233	0.062451	0.143172	0.25931	-0.19586	-0.166446	-0.136219	0.0285987	-0.00433131	-0.247508	0.0932636	0.0711447	NA	0.303972	0.44386	0.935542	0.311553	0.33868	0.38322	0.969425
1107	ASB13	0.116142	-0.121288	0.5206	0.0552414	-0.0348117	-0.00534125	0.31443	0.311118	-0.3218	0.17445	0.45441	0.226004	-0.0570095	0.179432	0.112874	-0.00239171	-0.212134	0.14251	-0.0447256	-0.197849	0.487121	0.554079	NA	0.686534	1.49134	0.408935	0.379224	0.571655	0.310611	1.86513
1108	ASB14	0.0656246	-0.220966	0.0388284	0.0185169	0.030581	-0.031641	-0.228813	-0.149841	0.0865593	-0.294271	-0.163355	0.173786	0.206991	-0.183904	0.0326887	0.00434502	0.0591282	0.00203391	-0.225435	-0.216497	-0.187211	0.264868	NA	0.32715	0.307052	0.400117	0.513407	0.287961	0.445057	0.579129
1109	ASB15	0.106902	0.106764	0.156757	0.0880145	0.0292423	0.0859871	0.136439	-0.0523352	0.224309	0.0447946	0.228083	-0.0298244	-0.0143924	0.364923	0.080538	0.0954911	-0.0547073	0.113192	-0.0482557	0.261783	0.137569	0.175944	NA	0.267132	0.428181	0.435334	0.590633	0.441639	0.373968	0.564785
1110	ASB16	-0.00713637	0.099085	-0.0411856	0.156696	0.262456	0.117885	-0.0144894	0.0433271	0.192443	0.192996	-0.221975	-0.118881	0.0418753	0.0555964	0.0915989	0.221793	0.324586	0.200326	0.182299	0.0158714	-0.4269	0.344529	NA	0.243676	0.360275	0.252588	0.633465	0.948128	0.288256	0.368095
1111	ASB17	-0.0278537	0.204366	-0.148157	0.00122123	0.181051	-0.179548	-0.0300162	-0.209419	-0.149678	-0.176289	0.116257	-0.0622195	-0.105272	0.0839301	0.32209	-0.319648	0.133462	0.228641	0.215606	0.193126	-0.238618	-0.0576966	Nonessential_DepMap	0.233152	0.308874	0.251812	0.406286	0.609798	1.01633	0.213746
1112	ASB18	0.0980276	0.197767	0.178753	0.0616803	-0.180927	-0.0323698	0.00323285	-0.0525886	-0.0121511	-0.147199	0.153664	-0.0612547	0.0700572	0.28528	0.0563958	0.0669648	-0.319726	-0.0421274	0.147193	0.24834	0.278214	0.0792912	NA	0.608615	0.367928	0.385103	0.179556	0.551765	0.504824	0.895018
1113	ASB2	0.107643	0.188324	0.111102	0.188643	0.118639	0.233856	0.279074	0.430347	0.037364	0.0796367	0.478512	0.0763054	0.0436114	0.203012	0.123977	0.253309	-0.0128999	0.250177	0.287586	0.0890613	0.133449	0.0887549	NA	0.406732	0.874431	0.632644	0.986842	0.434389	0.705387	0.392545
1114	ASB3	-0.0480043	-0.0866247	-0.213531	0.000792073	-0.0533196	0.30539	0.335551	0.47212	0.13866	0.491718	0.179383	0.0354621	0.086623	-0.266098	-0.0129555	0.0145396	-0.167085	0.0604456	-0.0793516	-0.0938978	0.192548	-0.619611	NA	0.550219	0.59916	0.31158	0.335273	0.618344	0.267594	0.412474
1115	ASB4	0.184305	0.30282	0.00281338	0.0817104	0.0612805	0.256314	0.306693	0.343063	0.169565	0.232266	0.381119	0.0904998	0.1891	0.273316	0.0543577	0.109063	0.211856	-0.0892953	0.326797	0.278843	0.196375	-0.190748	NA	0.64081	0.619992	0.876148	0.527756	0.365029	1.34223	0.384608
1116	ASB5	0.108295	0.250968	0.178868	0.0997089	0.302739	0.244601	0.246464	0.371581	0.11762	0.234165	0.258762	0.189221	0.0397813	0.0958812	0.180927	0.0184913	0.324528	0.280949	0.2159	0.286036	0.140702	0.217035	NA	0.663877	0.589737	0.600326	0.651557	2.17314	1.24759	0.660787
1117	ASB6	-0.134984	-0.0460505	-0.0908984	-0.238513	-0.0721179	-0.362536	-0.607077	-0.242007	-0.483065	-0.337503	-0.876651	-0.28809	0.0696795	-0.186542	0.0103225	-0.487348	0.344631	-0.488867	-0.0391706	-0.0529304	-0.0463561	-0.135441	NA	0.477067	0.649915	0.297569	0.343696	0.303656	0.253736	0.197654
1118	ASB7	0.130664	0.226701	0.466165	0.162451	0.341595	0.492308	0.452917	0.793712	0.190905	0.319414	0.58642	0.164999	0.0697921	0.157201	0.248937	0.0759641	0.25385	0.429341	0.400406	0.0529955	0.578604	0.353727	NA	0.812669	0.755339	0.847712	1.31393	1.16549	0.757829	1.21788
1119	ASB8	-0.241925	-0.167864	-0.314766	-0.0462866	0.0674983	-0.165777	-0.112867	-0.088866	-0.242688	-0.626699	0.400966	-0.0640633	-0.277687	-0.384025	-0.194823	0.10225	0.011078	0.123919	-0.139152	-0.196577	-0.374208	-0.255325	NA	0.257908	0.338931	0.490797	0.311211	0.323476	0.351333	0.256063
1120	ASB9	0.0411972	0.301444	0.07023	0.100445	-0.0521305	-0.290191	-0.30588	0.0595981	-0.63998	0.0611145	-0.672874	0.309084	-0.182453	-0.00303882	-0.156271	0.35716	0.0336107	-0.137872	0.224685	0.378203	0.313669	-0.173209	NA	0.266189	0.311255	0.199971	0.324362	0.713588	0.966804	0.572142
1121	ASCC1	-0.281857	-0.599391	-0.327386	-0.519216	-0.148721	-0.589559	-0.416611	-0.218375	-0.960744	-0.338413	-0.494809	-0.423241	-0.40054	-0.0217887	-0.661349	-0.377084	-0.227695	-0.0697476	-0.704198	-0.494585	-0.115565	-0.539207	NA	0.641145	0.735004	0.554396	1.07706	0.31971	1.15554	0.498708
1122	ASCC2	0.042326	0.0120166	0.255656	0.101757	0.256994	-0.00133767	0.478638	-0.155454	0.152779	0.682505	0.27477	-0.107316	0.0828063	0.151488	0.168054	0.035461	0.456263	0.0577254	-0.027997	0.0520302	-0.0563715	0.567683	NA	0.581856	1.12178	0.367543	0.455015	0.635072	0.324795	0.799763
1123	ASCC3	-0.228928	-0.323372	-0.779901	-0.207567	-0.261384	-0.418757	-0.551491	-0.48511	-0.352405	-0.747265	-0.355718	-0.226792	-0.417397	-0.0425954	-0.271326	-0.143808	0.0533698	-0.576138	-0.411949	-0.234795	-0.678504	-0.881298	essential_DepMap	0.492589	0.709843	0.68403	0.517019	0.677787	0.898683	1.39297
1124	ASCL1	0.0649227	-0.090436	-0.191407	0.0761549	-0.0259963	-0.310033	0.0397919	-0.406817	-0.213249	0.295125	-0.215541	0.0739385	0.0915862	0.0292434	0.0632851	0.0890248	-0.149251	0.097258	-0.0862922	-0.0945799	0.0211424	-0.403957	NA	0.374117	0.533844	0.492144	0.449821	0.25573	0.36252	0.246095
1125	ASCL2	0.0187785	0.240935	0.186041	0.0575966	0.215613	0.302652	0.236116	-0.0576328	0.662937	0.44963	0.0226025	0.00335027	-0.0220485	0.0750338	0.174019	-0.0588263	0.257332	0.173895	0.360804	0.121066	0.175097	0.196985	NA	0.562847	1.1892	0.454693	0.35774	1.23703	1.29522	0.61024
1126	ASCL3	-0.20419	-0.133954	0.038123	-0.13901	0.0438467	-0.268126	-0.112024	-0.615829	0.0795781	-0.305673	0.0816245	-0.348608	-0.174568	-0.0893933	0.0848825	-0.362903	-0.28366	0.371354	-0.295156	0.0272474	-0.0497564	0.126002	NA	0.25775	0.182488	0.320572	0.390988	0.304573	0.287847	0.457224
1127	ASCL4	0.0853576	0.217107	0.159962	0.27488	-0.0525425	0.154744	0.00473034	0.480628	-0.171139	-0.239856	0.249317	-0.012053	0.182705	0.0854206	0.329564	0.220197	-0.0823791	-0.0227059	0.171737	0.262476	0.128358	0.191565	NA	0.672437	0.344372	0.477556	1.04967	0.547455	0.573432	0.509789
1128	ASCL5	0.0733015	0.148372	0.219662	0.167518	0.152328	0.595025	0.207939	0.513824	0.676226	0.406772	0.00910668	0.0514434	0.150375	0.0180859	0.241231	0.0938045	0.209956	0.0947003	-0.0808799	0.377624	0.153036	0.286289	NA	2.38774	1.07224	0.425969	0.874711	0.624263	0.368248	0.830281
1129	ASF1A	-0.113447	-0.172831	-0.509868	-0.159792	-0.141332	-0.290377	-0.07221	0.0125691	-0.593323	-0.027846	-0.116574	-0.233446	-0.0799158	-0.0269794	-0.435595	0.116011	-0.450277	0.167613	-0.155778	-0.189884	-0.0864593	-0.933277	NA	0.542534	0.314348	0.210419	0.526418	0.357355	0.332027	0.736341
1130	ASF1B	-0.202591	-0.156254	-0.0883421	-0.414966	-0.23642	-0.278777	-0.150436	-0.492174	-0.0653797	-0.597826	0.296953	-0.257114	-0.163171	-0.187489	-0.307518	-0.522413	-0.131872	-0.340967	-0.141236	-0.171272	-0.272209	0.0955247	NA	0.55382	0.385314	0.444906	0.880629	0.774691	0.228177	0.25989
1131	ASGR1	-0.105377	-0.185959	-0.140253	-0.099884	0.0347217	-0.254883	0.0258986	-0.114045	-0.395722	0.163625	-0.111828	-0.0468624	-0.0668208	-0.202448	-0.00835767	-0.19141	0.0305887	0.0388547	-0.0332666	-0.338652	-0.163636	-0.116871	NA	0.318551	0.242096	0.259637	0.536303	0.286077	0.527585	0.167526
1132	ASGR2	-0.0992868	-0.0886973	0.0303899	0.0130301	0.198688	0.263754	-0.399894	0.554828	-0.0273211	-0.273049	-0.526739	0.111088	-0.406345	-0.00260374	0.00618065	0.0198795	0.267813	0.129563	-0.0391853	-0.138209	0.032536	0.0282438	NA	0.513323	0.561394	0.621602	0.378824	0.665516	0.609717	0.220551
1133	ASH1L	0.0616336	0.2746	0.0573915	0.290477	0.18644	0.101817	0.413282	0.334223	-0.130589	0.342295	0.484269	0.110181	0.062364	0.0123554	0.252697	0.328256	0.125377	0.247503	0.284271	0.264929	0.131449	-0.0166663	NA	0.844664	1.14226	0.431798	1.28011	0.354607	0.891739	0.203263
1134	ASH2L	-1.37592	-1.45258	-0.922793	-1.22142	-0.808153	-1.19758	-1.09587	-1.4729	-0.922269	-1.49831	-0.693432	-1.32366	-1.47103	-1.33305	-1.61041	-0.832434	-1.02175	-0.594551	-1.22228	-1.68288	-1.0625	-0.783084	NA	1.88344	1.48245	3.31695	2.33333	1.22772	3.08662	2.23682
1135	ASIC1	-0.232755	-0.0488965	-0.698792	-0.354413	-0.102616	-0.159534	0.000226719	-0.445941	0.126873	-0.157121	0.157575	-0.250281	-0.315935	-0.13205	-0.357328	-0.351499	-0.308698	0.103465	0.0337716	-0.131565	-0.854995	-0.54259	NA	0.467824	0.311398	0.510042	0.882865	0.290183	0.333974	1.07624
1136	ASIC2	-0.0476665	0.0922624	0.132871	-0.00486201	-0.0603629	0.00722474	0.164266	-0.0417217	0.0561712	0.330971	-0.00243822	-0.0560551	-0.00616582	-0.0807784	0.00584096	-0.015565	-0.197926	0.0772001	0.0524118	0.132113	0.0211842	0.244558	NA	0.320295	0.614077	0.354578	0.536794	0.190514	0.568331	0.497552
1137	ASIC3	0.157082	0.183797	0.024573	-0.0506462	0.130803	0.407164	-0.164189	0.528822	0.285506	-0.255336	-0.0730418	0.275174	0.0818057	0.114265	-0.176867	0.0755744	0.157236	0.104369	0.329699	0.0378942	0.268768	-0.219622	NA	1.47521	0.294436	0.430626	0.557425	0.413784	0.445414	0.475838
1138	ASIC4	-0.103175	-0.20741	0.101591	-0.132284	-0.0578345	-0.0327871	0.186708	0.00599989	-0.0715741	0.197144	0.176271	-0.0484958	-0.106271	-0.154757	-0.0431823	-0.221386	0.113707	-0.229376	-0.177852	-0.236968	-0.0199936	0.223176	NA	0.284126	0.205042	0.332547	0.224037	0.326205	0.444875	0.336681
1139	ASIC5	0.35186	0.00334208	0.157236	0.0911068	0.269763	0.135758	-0.274349	0.0109672	0.260549	-0.0941362	-0.454562	0.372209	0.423765	0.259605	0.254706	-0.0724923	0.244225	0.2953	0.140381	-0.133697	0.0269697	0.287503	Nonessential_DepMap	0.425211	0.353219	1.54061	0.47273	0.951275	0.436952	0.574058
1140	ASIP	0.0231148	-0.00504761	-0.2098	-0.269208	0.0157323	0.411492	0.576452	0.250803	0.572181	0.663344	0.48956	0.203555	-0.0735771	-0.060634	0.0205908	-0.559008	0.229214	-0.19775	-0.157953	0.147858	-0.0598775	-0.359723	NA	0.84138	1.08829	0.539102	0.296752	0.329764	0.368105	0.466826
1141	ASL	0.145516	0.238868	0.0129905	-0.0143836	0.217221	0.0477336	0.214146	0.34194	-0.246473	-0.0249245	0.453217	0.0705849	0.190299	0.175665	-0.0296726	0.000905415	0.379016	0.0554259	0.41862	0.0591161	0.44834	-0.422359	NA	0.538983	0.320268	0.69897	0.283667	0.998089	0.391564	0.705111
1142	ASMT	0.0142791	0.196271	0.151365	0.0599823	0.0736531	0.280159	0.0404382	0.117848	0.44247	-0.144389	0.225266	0.0399492	-0.0150809	0.017969	0.0869087	0.0330559	-0.0182737	0.16558	0.228854	0.163688	0.0455535	0.257177	NA	0.648009	0.157996	0.417937	0.433952	0.380483	0.742862	0.605171
1143	ASMTL	-0.29188	-0.553138	0.00163933	-0.221884	0.0129243	-0.440436	-0.0962344	-0.816357	-0.064515	0.0170704	-0.209539	-0.500527	-0.22141	-0.153703	-0.382972	-0.0607961	0.230647	-0.204798	-0.696679	-0.409597	0.147516	-0.144238	NA	0.264641	0.290446	0.345823	0.346161	0.285096	0.874727	0.244926
1144	ASNA1	-0.664343	-0.654857	-0.987467	-0.717397	-0.853024	-0.85481	-0.602812	-0.804581	-0.905039	-0.411133	-0.79449	-0.885558	-0.49258	-0.614891	-0.8129	-0.621893	-1.15241	-0.553643	-0.657909	-0.651804	-1.18166	-0.793274	NA	1.68278	0.939002	1.46597	2.04036	1.76627	1.52601	2.61023
1145	ASNS	-0.208241	-0.0465748	0.222598	-0.14743	-0.289851	-0.184956	-0.181874	-0.00324562	-0.366667	-0.174616	-0.189132	-0.0262021	-0.30088	-0.297641	-0.128219	-0.166641	-0.357038	-0.222665	0.0560139	-0.149163	-0.00510153	0.450298	NA	0.250067	0.281743	0.49485	0.259574	0.560288	0.306836	0.570649
1146	ASNSD1	-0.0393439	0.000219503	-0.261286	-0.0818566	0.176181	-0.0822075	0.277465	-0.0433832	-0.121032	0.212289	0.342641	-0.126251	0.0672343	-0.0590146	-0.146563	-0.0171505	0.131487	0.220876	0.050894	-0.050455	-0.457034	-0.0655375	NA	0.342848	0.924942	0.314258	0.551835	0.523197	0.509739	0.470692
1147	ASPA	-0.0911517	-0.0191176	0.158877	-0.0752048	-0.190785	0.185457	-0.167975	0.07439	0.296525	-0.12733	-0.208619	-0.0665936	-0.0878098	-0.119052	-0.14701	-0.00340002	-0.0794449	-0.302126	0.00390185	-0.0421371	0.0247453	0.29301	NA	0.569135	0.226623	0.274905	0.295365	0.339509	0.204294	0.607981
1148	ASPDH	-0.204759	-0.271048	-0.335337	-0.35384	0.0359495	-0.150389	-0.164898	-0.0806324	-0.220146	-0.053982	-0.275814	-0.304258	-0.193128	-0.11689	-0.20198	-0.505699	-0.0248758	0.0967748	-0.335451	-0.206644	-0.253437	-0.417237	NA	0.476169	0.272166	0.414539	0.601907	0.460165	0.371954	0.47877
1149	ASPG	0.21628	0.157971	0.252725	0.221814	0.135087	0.277783	0.0716991	0.56516	-0.00959287	0.0328486	0.11055	0.336753	0.160162	0.151924	0.226481	0.217147	0.21054	0.0596333	0.175535	0.140407	0.411908	0.0935409	NA	0.881636	0.337889	1.07883	1.24633	0.860618	0.786096	0.431619
1150	ASPH	0.0158762	-0.0893999	0.0710139	0.00813779	0.0995759	0.0494446	0.141501	-0.309924	0.408813	0.159952	0.12305	0.139377	-0.0319019	-0.0598464	-0.0367883	0.0530639	-0.184741	0.383893	0.0247628	-0.203563	0.258899	-0.116871	NA	0.659843	0.346493	0.280669	0.631365	0.323375	0.196215	0.376369
1151	ASPHD1	0.113271	0.208546	0.093815	0.175202	-0.145407	0.0259606	0.180893	-0.0262751	0.0781963	-0.0391658	0.400951	0.163666	0.0663464	0.1098	0.146641	0.203763	-0.192375	-0.098439	0.211395	0.205696	0.0801103	0.10752	NA	0.365457	0.46225	0.61261	1.08673	0.103149	0.737122	0.3215
1152	ASPHD2	0.200325	0.120089	0.0363364	-0.0587274	0.115376	-0.108944	-0.199156	-0.148769	-0.0691189	-0.31607	-0.0822412	0.162226	0.293823	0.144928	-0.105312	-0.0121424	0.137726	0.0930257	-0.0726006	0.312778	-0.249427	0.3221	NA	0.322521	0.366794	0.769551	0.329263	0.443535	0.385747	0.390485
1153	ASPM	-0.434131	-0.430189	-0.380681	-0.472249	-0.344639	-0.816636	-0.692503	-0.90262	-0.730652	-0.532866	-0.852139	-0.45019	-0.401017	-0.451187	-0.575573	-0.368925	-0.0602343	-0.629043	-0.510214	-0.350164	-0.746124	-0.0152375	NA	1.3508	0.768137	0.826814	0.729088	0.661864	0.780088	0.608283
1154	ASPN	-0.0537385	0.0259048	0.0792862	-0.0474394	0.181399	-0.237034	0.105681	-0.224567	-0.249501	-0.274387	0.48575	-0.133065	-0.143046	0.114896	-0.141604	0.0467254	0.240416	0.122381	0.0915177	-0.0397082	0.0139679	0.144605	NA	0.408679	0.284419	0.367543	0.221863	0.65714	0.311865	0.397276
1155	ASPRV1	0.31869	0.145229	0.38392	0.235775	0.253266	0.159421	0.55198	0.103653	0.215189	0.770275	0.333685	0.360835	0.292908	0.302327	0.32004	0.151509	0.258404	0.248128	0.209906	0.0805525	0.345662	0.422178	NA	0.674823	1.0686	1.8729	1.1884	1.12507	0.842755	1.51373
1156	ASPSCR1	-0.0177787	-0.073736	-0.157976	-0.257622	0.0955671	-0.0745259	-0.204678	-0.0641699	-0.0848819	-0.236829	-0.172527	0.00616849	0.0342086	-0.0937132	-0.358711	-0.156533	0.0628374	0.128297	0.101366	-0.248838	-0.149182	-0.166769	NA	0.158115	0.19802	0.279841	0.397642	0.397853	0.26929	0.330107
1157	ASRGL1	-0.182354	-0.239745	-0.190026	-0.0741524	-0.161796	-0.189443	-0.125313	-0.116504	-0.262382	-0.0753384	-0.175288	-0.287757	-0.0755908	-0.183716	-0.032439	-0.115866	-0.337531	0.0139395	-0.322511	-0.156979	-0.416404	0.0363524	NA	0.246187	0.399643	0.264401	0.177312	0.375053	0.44763	0.458411
1158	ASS1	-0.0605065	-0.0879659	-0.16209	-0.275623	-0.169467	-0.237071	0.26527	-0.226034	-0.248107	0.532529	-0.00198896	-0.246234	0.14031	-0.0755958	-0.183941	-0.367306	-0.294337	-0.0445968	-0.101865	-0.0740673	-0.151145	-0.173035	NA	1.5644	0.53848	0.555955	0.529972	0.41928	0.420251	0.622712
1159	ASTE1	0.113016	-0.011443	-0.237191	0.0923053	0.1292	0.0368823	-0.308379	-0.0166397	0.0904044	-0.783375	0.166617	0.190368	0.101691	0.0469889	-0.050955	0.235566	0.220633	0.0377674	0.0510969	-0.0739829	0.113769	-0.588152	NA	0.77492	0.359862	0.47237	0.59756	0.550545	0.446038	0.428751
1160	ASTL	-0.42104	-0.690443	-0.0792294	-0.176885	-0.367276	-0.673522	-0.587952	-1.03504	-0.312007	-0.781118	-0.394785	-0.640018	-0.343924	-0.279177	-0.0526757	-0.301095	-0.305721	-0.42883	-0.97447	-0.406415	0.0103649	-0.168824	NA	0.602931	0.656743	1.09259	0.401144	0.610402	1.05729	0.208604
1161	ASTN1	-0.224727	-0.154568	-0.131332	0.0507323	-0.135409	-0.252792	-0.0495041	-0.585305	0.0797223	0.388195	-0.487204	-0.173401	-0.270637	-0.230144	0.0120806	0.089384	-0.260995	-0.0098238	-0.183714	-0.125423	-0.026776	-0.235888	NA	0.711119	0.361982	0.527244	0.352683	0.415646	0.167137	0.308989
1162	ASTN2	-0.12675	-0.0309153	-0.3264	0.0932662	-0.199573	0.100678	0.0771391	0.145414	0.0559429	0.233971	-0.0796923	-0.151213	-0.142443	-0.0865942	0.204139	-0.0176066	-0.0511308	-0.348015	0.00634081	-0.0681715	-0.517224	-0.135576	NA	0.502083	0.620124	0.262807	0.604342	0.348514	0.26268	0.451009
1163	ASXL1	-0.18253	0.174723	-0.22329	-0.105109	-0.0371666	-0.128561	0.023663	0.0940323	-0.351155	0.57878	-0.531454	-0.0244666	-0.0243804	-0.498743	-0.0358497	-0.174368	-0.181172	0.106839	0.0328414	0.316604	0.128818	-0.575398	NA	0.3302	0.424662	0.254145	0.130044	0.202462	0.510474	0.302535
1164	ASXL2	0.0623061	0.40077	0.252115	-0.00795506	0.293709	-0.110185	-0.0577851	-0.0499914	-0.170378	-0.109155	-0.00641544	0.104854	-0.183268	0.265333	0.0660205	-0.0819306	0.0031545	0.584264	0.243493	0.558046	0.0397418	0.464488	NA	0.104354	0.662923	0.473661	0.224331	0.859013	2.00741	0.61595
1165	ASXL3	0.172326	0.175439	-0.14685	0.0552439	0.138755	0.120254	0.0714243	-0.212607	0.453116	-0.295338	0.438186	0.21383	0.0827533	0.220395	0.161922	-0.0514338	0.239017	0.0384923	0.240422	0.110455	-0.0660672	-0.227633	NA	0.471989	0.571209	0.649752	0.458577	0.774432	0.825145	0.251076
1166	ASZ1	-0.11527	-0.0280021	0.00906756	0.0622779	-0.0633518	0.103408	0.0300505	0.184767	0.0220485	0.311655	-0.251554	-0.0562072	-0.1398	-0.149802	-0.00584274	0.130399	-0.125853	-0.000850848	-0.0709247	0.0149204	-0.0244722	0.0426074	Nonessential_DepMap	0.523292	0.298523	0.143876	0.360245	0.327736	0.303312	0.291936
1167	ATAD1	-0.10536	0.161412	0.164379	-0.160262	0.015183	-0.169657	0.0229186	-0.0960263	-0.243288	-0.138607	0.184444	-0.020599	-0.199443	-0.096039	-0.343746	0.0232223	0.310089	-0.279723	0.0492153	0.273609	0.196198	0.132561	NA	0.269149	0.648465	0.279014	0.222969	0.626052	0.723982	0.460109
1168	ATAD2	-0.0105317	-0.101785	-0.354249	-0.227848	-0.0226081	-0.0581762	-0.134289	0.0576488	-0.174001	-0.135089	-0.133489	-0.134178	-0.141231	0.243814	-0.408479	-0.0472161	-0.14177	0.096554	-0.228464	0.024895	-0.414472	-0.294025	NA	0.164744	0.147727	0.436519	0.570532	0.27077	0.271289	0.91078
1169	ATAD2B	-0.0555447	-0.101813	-0.183381	0.0925545	0.102441	0.205474	0.0548488	0.227973	0.182975	0.079411	0.0302866	-0.00748126	-0.00657732	-0.152575	0.0364194	0.14869	0.184319	0.020563	0.0273507	-0.230977	-0.252638	-0.114123	NA	0.797321	0.390699	0.467246	0.509519	0.547707	0.18972	0.364325
1170	ATAD3A	-0.0729941	-0.0905255	-0.299721	-0.160804	-0.288747	-0.134975	-0.102617	-0.0898199	-0.180131	-0.343301	0.138066	-0.0728058	-0.10131	-0.0448661	-0.187695	-0.133913	-0.290835	-0.286659	0.00500767	-0.186059	-0.481351	-0.118091	NA	0.192797	0.618118	0.186419	0.33441	0.335621	0.452699	0.348814
1171	ATAD3B	-0.0810584	0.209015	0.086837	0.145533	-0.00529367	0.0719094	-0.14568	0.221678	-0.0778594	-0.35162	0.0602612	-0.0892624	-0.0670548	-0.0868581	0.140628	0.150437	0.0173994	-0.0279867	0.218376	0.199654	0.111868	0.0618057	NA	0.860424	0.25432	0.69897	0.529531	0.414441	0.930985	0.203041
1172	ATAD3C	-0.0667868	-0.403686	-0.57491	-0.269863	-0.691807	0.0301039	-1.1093	0.0960733	-0.0358656	-0.616457	-1.60215	-0.378404	0.163343	0.0147006	-0.334378	-0.205348	-0.874586	-0.509029	-0.52023	-0.287142	-0.585507	-0.564314	NA	0.587321	1.04844	0.405607	0.658486	1.04816	0.497368	0.904064
1173	ATAD5	-0.284847	-0.369223	-0.153682	-0.494392	-0.449242	-0.490013	-0.132067	-0.455435	-0.524592	0.285693	-0.549827	0.0029669	-0.192804	-0.664703	-0.403765	-0.585019	-0.351172	-0.547312	-0.0798055	-0.65864	-0.426733	0.119368	NA	0.564267	0.493434	0.575118	0.72817	0.847836	0.543371	0.655677
1174	ATAT1	-0.101832	-0.353786	-0.121745	-0.0558118	0.0987951	0.0230483	-0.261114	-0.0379515	0.084048	0.627716	-1.14995	-0.309352	-0.0685994	0.0724556	-0.0884177	-0.0232059	0.0217834	0.175807	-0.707066	-0.000505522	-0.636783	0.393294	NA	0.422095	0.321275	0.202732	0.261572	0.829548	0.418698	0.301738
1175	ATCAY	-0.0975098	-0.243115	-0.0753555	-0.0928915	0.128708	0.00319864	-0.093165	-0.222766	0.229164	0.328138	-0.514468	-0.191829	-0.134697	0.033997	-0.0693084	-0.116475	0.143087	0.114329	-0.320672	-0.165559	-0.255808	0.105097	NA	0.353685	0.24287	0.196543	0.283225	0.253385	0.478261	0.282721
1176	ATE1	0.160496	0.0193413	0.220159	0.102062	-0.229194	0.252487	-0.138086	0.478816	0.0261568	-0.576627	0.300454	0.0596707	0.34857	0.0732479	0.0752101	0.128913	0.0361856	-0.494574	-0.0302149	0.0688976	0.268982	0.171337	NA	0.550071	0.395078	0.632644	0.643467	0.361117	0.310225	0.708132
1177	ATF1	-0.0759617	-0.211654	-0.121332	-0.0899689	-0.282534	0.0223688	0.08805	0.0751468	-0.0304092	-0.20075	0.37685	-0.114358	-0.0871127	-0.0264148	-0.139083	-0.0408545	-0.097363	-0.467705	-0.556636	0.133329	-0.265499	0.0228345	NA	0.153184	0.411409	0.130182	0.305048	0.326735	0.344703	0.306075
1178	ATF2	-0.171175	0.34665	-0.284618	0.0171658	-0.275934	0.0863249	0.0792525	0.0995362	0.0731136	0.240523	-0.0820184	-0.319319	-0.0765907	-0.117615	0.0741314	-0.0397999	-0.287697	-0.264172	0.308583	0.384717	-0.718658	0.149423	NA	0.440992	0.356375	0.361511	0.279998	0.456845	1.04518	0.297401
1179	ATF3	0.132099	0.0656122	0.034665	0.123204	0.230039	0.379145	-0.269144	0.461536	0.296753	-0.102818	-0.43547	0.0355755	0.12933	0.231393	0.245826	0.000582705	0.343161	0.116916	0.159895	-0.0286711	-0.302061	0.371391	NA	0.853267	0.333651	0.640165	0.988918	0.482831	0.518787	0.589674
1180	ATF4	-0.341592	-0.223965	-0.132627	-0.0734883	-0.14968	-0.0855358	0.179474	0.110728	-0.281799	0.312208	0.0467403	-0.327187	-0.332772	-0.364816	0.016437	-0.163414	-0.0741882	-0.225173	-0.104581	-0.34335	-0.242289	-0.0229651	NA	0.404129	0.478348	0.869666	0.167271	0.212586	0.358556	0.280619
1181	ATF5	-0.269282	-0.477694	-0.37505	-0.45318	-0.560288	-0.140738	-0.605998	-0.0775284	-0.203948	0.112837	-1.32483	-0.0527769	-0.754858	-0.000210152	-0.404313	-0.502046	-0.238508	-0.882069	-0.20092	-0.754468	-0.5076	-0.2425	NA	0.31399	0.433266	0.322393	0.783148	0.834749	0.575723	0.530333
1182	ATF6	0.0958678	0.0549702	-0.318826	-0.0240121	0.0872523	-0.311929	-0.0228872	-0.315359	-0.308499	0.0266794	-0.0724538	0.0862862	0.118052	0.0832654	-0.0414445	-0.00657963	0.249598	-0.0750939	0.135303	-0.0253626	-0.544883	-0.0927702	NA	0.423066	0.279957	0.565431	0.277794	0.499311	0.560762	0.653267
1183	ATF6B	0.0895032	0.158123	0.0495316	-0.0308636	0.0511717	0.330538	-0.0210602	0.371317	0.28976	0.0899951	-0.132116	0.00938008	0.108649	0.150481	0.00550126	-0.0672284	0.0174118	0.0849317	0.0700798	0.246167	0.0784185	0.0206447	NA	1.15871	0.229863	0.545155	0.153793	0.564402	0.680096	0.140706
1184	ATF7	-0.0843558	0.0395087	-0.239509	-0.141185	-0.0327994	-0.00243375	0.279215	0.130255	-0.135123	0.340878	0.217553	-0.0738172	-0.10789	-0.0713605	-0.0937175	-0.188652	-0.396241	0.330642	0.0452775	0.0337399	-0.221423	-0.257596	NA	0.22849	0.637367	0.281498	0.340621	0.945121	0.513116	0.321049
1185	ATF7IP	-0.0885785	-0.00756872	0.320565	0.0323212	0.0329233	-0.0275834	0.205079	-0.278058	0.222891	0.359579	0.0505788	-0.0222224	-0.103836	-0.139678	-0.0678691	0.132511	0.100836	-0.0349897	0.143836	-0.158974	0.211883	0.429246	NA	0.81953	0.763954	0.429457	0.534454	0.228743	0.462899	0.938174
1186	ATF7IP2	-0.020717	0.0529513	0.064739	0.138323	-0.106774	-0.251068	0.297808	-0.326069	-0.176068	0.230671	0.364946	0.193315	-0.139925	-0.11554	0.122124	0.154523	-0.0965433	-0.117006	-0.10718	0.213082	-0.101188	0.230666	NA	0.347758	0.72567	0.424812	0.71069	0.379885	0.322244	0.700164
1187	ATG10	0.0233972	-0.123303	-0.183691	-0.0303057	-0.154409	0.0607593	0.377705	0.192496	-0.0709772	0.614463	0.140948	-0.0322959	0.171096	-0.0686084	-0.00507873	-0.0555326	-0.25866	-0.0501583	-0.181035	-0.065571	-0.0883761	-0.279005	NA	0.409036	0.754484	0.354578	0.244773	0.488799	0.309034	0.24306
1188	ATG101	0.0709949	0.0232067	-0.116686	-0.0391974	0.0526529	-0.174	0.0401621	0.0298424	-0.377842	-0.0964499	0.176774	0.0814591	0.109795	0.0217303	0.0214669	-0.0998617	0.0810979	0.024208	0.126308	-0.0798947	-0.342268	0.108896	NA	0.497266	0.228938	0.61261	0.2186	0.171859	0.326756	0.356824
1189	ATG12	-0.096874	-0.0273531	0.0358664	0.259847	-0.0214645	-0.0359637	-0.304328	-0.0913614	0.0194339	-0.586285	-0.022371	0.00486839	-0.075129	-0.220361	0.187905	0.331788	0.134559	-0.177488	0.226944	-0.28165	0.184794	-0.113061	NA	0.174811	0.458752	0.330683	1.15419	1.22871	0.248821	0.398429
1190	ATG13	-0.352496	-0.332293	-0.0534694	-0.322315	-0.0961577	-0.540077	-0.342389	-0.77752	-0.302635	-0.437126	-0.247651	-0.319606	-0.433473	-0.304409	-0.382406	-0.262224	0.0175733	-0.209889	-0.409921	-0.254665	-0.109189	0.00225019	NA	0.747677	0.552741	0.860121	0.771791	0.327833	0.760508	0.158315
1191	ATG14	0.146017	0.0319539	-0.0527362	-0.0372619	-0.154278	0.0138625	0.0332084	0.177876	-0.150151	0.0655349	0.000881988	0.392357	-0.214803	0.260498	0.00391244	-0.0784362	-0.152563	-0.155993	0.000608866	0.063299	-0.0537066	-0.0517659	NA	0.498468	0.352021	0.712198	0.453945	0.246497	0.327436	0.305114
1192	ATG16L1	0.112087	0.0461455	0.0691255	0.00972602	0.00534954	0.0217131	0.0837036	0.0561696	-0.0127434	0.237356	-0.0699487	0.183827	0.0419283	0.110505	0.0458534	-0.0264013	-0.058407	0.0691061	0.00188535	0.0904056	0.130875	0.00737607	NA	0.308136	0.426328	0.628932	0.740183	0.666825	0.440458	0.308529
1193	ATG16L2	0.0954814	0.0521831	0.152969	0.201513	0.00859675	0.152399	-0.0847133	-0.0429865	0.347784	0.225682	-0.395109	-0.0295757	0.267191	0.0488286	0.0907228	0.312304	-0.0247355	0.041929	0.106528	-0.00216152	0.276183	0.0297561	NA	0.481378	0.513974	0.390406	0.776306	0.164836	0.443872	0.706358
1194	ATG2A	-0.032004	0.0808175	0.0569797	0.184685	0.222938	0.206402	0.188148	-0.207404	0.620208	0.376218	7.69133e-05	0.0108002	-0.0453329	-0.0614793	0.258663	0.110707	0.1558	0.290077	0.140129	0.0215058	0.25669	-0.142731	NA	0.374927	0.612441	0.364516	0.653256	0.89229	0.458945	0.299231
1195	ATG2B	-0.00551076	0.084991	0.315352	-0.0181433	0.246235	0.186443	0.176999	0.121529	0.251357	0.303312	0.0506866	0.268401	-0.242137	-0.0427959	0.0301619	-0.0664484	0.2679	0.224571	0.0844743	0.0855077	0.574113	0.0565915	NA	0.626518	0.792634	0.217527	0.447861	0.87623	0.714319	0.61899
1196	ATG3	-0.0920984	0.0517159	0.0398518	-0.104336	-0.113766	-0.289187	0.0210235	-0.0113892	-0.566984	-0.0733905	0.115438	-0.109432	-0.134412	-0.0324508	-0.12425	-0.0844228	-0.0327529	-0.19478	0.0268191	0.0766128	0.202103	-0.1224	NA	0.351713	0.210218	0.149354	0.37212	0.211252	0.349362	0.378829
1197	ATG4A	-0.019281	-0.0603484	-0.0760137	-0.145543	-0.0997093	-0.259294	-0.0100919	-0.462739	-0.055848	0.26647	-0.286654	-0.148459	0.102228	-0.0116121	-0.0841	-0.206986	-0.194428	-0.00499074	-0.259317	0.13862	-0.251834	0.0998067	NA	0.380808	0.283596	0.191789	0.303976	0.229863	0.276754	0.307365
1198	ATG4B	-0.140296	0.0508379	-0.229972	-0.205726	-0.204182	-0.120516	0.545271	-0.0723042	-0.168729	0.431443	0.6591	0.134437	-0.0219849	-0.533341	-0.353883	-0.057569	-0.198116	-0.210247	0.00473489	0.0969409	-0.0685188	-0.391426	NA	0.445529	1.46205	0.221849	0.57931	0.553727	0.23937	0.34715
1199	ATG4C	-0.0120518	-0.184165	-0.306302	-0.206847	-0.248912	-0.470195	-0.0787388	-0.407206	-0.533183	-0.150615	-0.00686254	0.209536	-0.137176	-0.108516	-0.110554	-0.303141	-0.0559799	-0.441844	-0.264744	-0.103586	-0.222614	-0.389989	NA	0.891254	0.293176	0.453457	0.388781	0.464307	0.34802	0.541007
1200	ATG4D	-0.226859	-0.346969	0.0721146	-0.122501	-0.443641	-0.100557	0.108939	0.11958	-0.320695	0.0158945	0.201983	-0.244747	-0.317711	-0.118118	0.16073	-0.405732	-0.401039	-0.486242	-0.399681	-0.294256	0.212672	-0.0684427	NA	0.293508	0.286963	0.378824	0.450032	0.851593	0.540494	0.326307
1201	ATG5	-0.0625281	-0.116907	0.191824	-0.0581776	-0.101262	-0.387578	-0.306972	0.0497369	-0.824893	-0.340631	-0.273313	-0.182835	0.185164	-0.189913	-0.0278102	-0.0885449	0.106388	-0.308912	0.0581822	-0.291997	-0.017988	0.401636	NA	0.343905	0.209099	0.294992	0.180844	0.472788	0.303299	0.658458
1202	ATG7	-0.163891	0.089226	-0.0503076	-0.122646	0.014506	-0.42402	-0.131307	-0.360973	-0.487066	-0.253343	-0.00927057	-0.515668	0.126202	-0.102206	-0.104784	-0.140507	-0.127695	0.156707	0.0733742	0.105078	0.0696827	-0.170298	NA	0.598255	0.270446	0.348722	0.271374	0.348058	0.417244	0.158034
1203	ATG9A	-0.187517	-0.378016	-0.0110472	-0.289559	-0.0421438	-0.0903955	0.213843	-0.151601	-0.0291896	0.236585	0.1911	-0.311339	-0.149434	-0.101779	-0.354742	-0.224375	-0.28773	0.203442	-0.27476	-0.481271	-0.0285112	0.0064167	NA	0.292587	0.500932	0.518557	0.95307	0.483617	0.63136	0.295013
1204	ATG9B	0.243469	0.232046	0.192234	0.305826	0.0090613	0.325239	0.046895	0.270251	0.380227	0.454144	-0.360354	0.346307	0.141483	0.242619	0.282495	0.329158	0.169295	-0.151173	0.18823	0.275862	0.214828	0.169641	NA	0.791058	0.503903	0.886057	1.44196	0.383031	0.90959	0.696685
1205	ATIC	-1.86943	-1.2716	-1.46474	-1.50846	-1.65151	-1.67402	-1.75909	-1.63297	-1.71508	-2.275	-1.24318	-2.24167	-1.64186	-1.72476	-1.60677	-1.41015	-2.47373	-0.829289	-1.29405	-1.24915	-1.91875	-1.01073	essential_DepMap	2.59029	2.01844	3.95861	3.1511	2.50518	2.23684	2.30618
1206	ATL1	-0.0472043	0.042082	0.127644	0.077045	0.0773637	0.0132642	0.293845	0.248957	-0.222429	0.452572	0.135119	0.0523835	-0.253567	0.0595712	-0.0427443	0.196834	0.123696	0.0310315	-0.00687799	0.091042	-0.0238576	0.279145	NA	0.411224	0.555908	0.413413	0.607081	0.266895	0.300835	0.464187
1207	ATL2	-0.42659	-0.330805	-0.421039	-0.439551	-0.146134	-0.711459	-0.794573	-0.733155	-0.689762	-0.780496	-0.808651	-0.629464	-0.477379	-0.172926	-0.397221	-0.48188	-0.251722	-0.0405468	-0.439871	-0.221738	-0.40334	-0.438739	essential_DepMap	0.843451	0.945121	0.701147	0.691777	0.294928	0.410246	0.604953
1208	ATL3	0.00460544	0.123229	-0.0734984	0.0261594	0.378937	-0.466344	-0.128209	-0.339978	-0.59271	0.123911	-0.38033	0.0862595	-0.102204	0.0297604	-0.146342	0.198661	0.15953	0.598344	0.0797741	0.166684	0.0932218	-0.240219	NA	0.591794	0.315527	0.307153	0.327842	0.683569	0.933532	0.257051
1209	ATM	-0.132729	-0.0896794	-0.21073	-0.301336	-0.438174	-0.200059	-0.0427365	0.199754	-0.599871	0.0212504	-0.106723	-0.15546	-0.179299	-0.0634271	-0.224961	-0.377711	-0.433913	-0.442436	-0.0287797	-0.150579	-0.404238	-0.0172224	NA	0.557216	0.147322	0.381952	0.86112	1.03244	0.275073	0.457038
1210	ATMIN	-0.312317	-0.169817	0.0350504	-0.0971525	0.133834	-0.139813	-0.291891	-0.101259	-0.178367	-0.43992	-0.143861	-0.208791	-0.339717	-0.388443	-0.0432699	-0.151035	0.015996	0.251673	-0.0915191	-0.248116	0.032583	0.0375178	NA	0.157878	0.3496	0.659556	0.296795	0.307096	0.259128	0.589906
1211	ATN1	-0.102467	-0.0278295	-0.0432509	-0.0959468	0.011703	-0.125442	0.40093	-0.114178	-0.136706	0.437007	0.364852	-0.0262374	-0.24274	-0.0384223	-0.112221	-0.0796722	-0.293302	0.316708	-0.0453978	-0.0102613	0.233188	-0.319689	NA	0.231706	1.07167	0.247184	0.278474	0.416229	0.166894	0.518902
1212	ATOH1	0.0970002	0.0947621	0.183279	0.0909604	-0.00511623	0.197447	-0.0693937	-0.232536	0.62743	-0.391965	0.253177	0.0421627	0.0441879	0.20465	0.0643697	0.117551	-0.162365	0.152133	-0.103977	0.293501	0.09318	0.273378	Nonessential_DepMap	0.400335	0.33791	0.36251	0.643573	0.105687	0.490445	0.527127
1213	ATOH7	-0.147962	-0.141785	-0.0597287	-0.229683	-0.122306	0.00868582	0.00102789	-0.0210509	0.0384226	0.205277	-0.203221	-0.149759	-0.140263	-0.153864	-0.375129	-0.0842371	-0.243314	-0.001297	-0.060953	-0.222618	0.0546131	-0.17407	NA	0.294115	0.281635	0.363512	0.536331	0.186242	0.515295	0.324208
1214	ATOH8	0.148721	-0.0531262	0.0129982	-0.132755	-0.124746	-0.208186	0.351563	-0.485821	0.0694487	0.436097	0.267029	0.165066	0.141271	0.139825	-0.066483	-0.199027	-0.171788	-0.0777037	-0.0316439	-0.0746085	-0.0379936	0.06399	NA	0.908235	0.707988	0.752027	0.448477	0.604024	0.340916	0.452474
1215	ATOX1	-0.0119075	-0.125884	0.261528	0.0591625	0.178541	-0.1863	0.169992	-0.431126	0.0585263	-0.394089	0.734072	-0.0220224	-0.0365921	0.0228918	0.0799718	0.0383532	0.425298	-0.0682167	-0.0923431	-0.159424	0.457211	0.0658437	NA	0.262239	1.4569	0.536107	0.555776	0.444502	0.400259	0.801749
1216	ATP10A	-0.331043	-0.256241	-0.136857	0.0421834	-0.556417	-0.509576	-0.138322	-1.16803	0.148874	0.0195919	-0.296236	-0.376151	-0.435096	-0.181883	0.0179806	0.0663863	-0.387688	-0.725146	-0.290379	-0.222103	-0.230211	-0.0435028	NA	0.374811	0.358585	0.482804	0.37913	0.796856	0.247709	0.366123
1217	ATP10B	0.18308	0.125449	-0.156744	-0.0866838	0.111291	0.182727	0.0229752	-0.191239	0.556692	0.135235	-0.0892842	0.118709	0.170201	0.260331	-0.0979053	-0.0754624	0.370943	-0.148361	0.0384019	0.212496	-0.0998836	-0.213605	NA	0.319167	0.0624395	1.2321	0.16775	0.786659	0.523509	0.250411
1218	ATP10D	0.088042	0.122533	0.177474	-0.00569165	0.337822	-0.0208795	0.0665038	-0.0642329	0.0224739	-0.0720807	0.205088	0.0418293	0.0893332	0.132963	-0.095677	0.0842937	0.210519	0.465124	0.0100465	0.235019	-0.0322974	0.387245	NA	0.199389	0.440716	0.517126	0.567399	1.6143	0.298151	0.714724
1219	ATP11A	-0.224992	-0.137493	0.00780355	-0.262071	-0.128904	0.348871	-0.0132747	0.126918	0.570823	-0.419989	0.39344	-0.487299	-0.293133	0.105456	-0.433521	-0.0906213	-0.124752	-0.133056	-0.187281	-0.0877049	-0.200772	0.216379	NA	0.486106	0.30952	0.482804	0.318379	0.437701	0.26722	0.294705
1220	ATP11AUN	0.134483	-0.0179962	0.141482	0.178061	0.133368	0.357725	0.300979	0.354473	0.360978	0.00334607	0.598612	0.117989	0.141264	0.144196	0.177518	0.178604	0.0937697	0.172966	0.127686	-0.163678	0.192307	0.0906574	NA	1.15656	0.543122	0.527244	0.898739	0.472776	0.190006	0.372394
1221	ATP11B	-0.0220698	-0.0218342	-0.204606	-0.167581	0.0272521	0.228851	0.0765773	0.249026	0.208677	0.032405	0.12075	-0.0249113	-0.0064872	-0.0348108	-0.166384	-0.168778	-0.0243414	0.0788456	-0.0686635	0.0249951	-0.0729425	-0.33627	NA	0.561149	0.375285	0.199283	0.323764	0.316548	0.408312	0.28464
1222	ATP11C	-0.0780171	0.0238383	0.158612	0.000661983	0.0270192	0.131603	0.0559115	0.107219	0.155987	-0.0470311	0.158854	-0.0954962	-0.188894	0.0503392	0.00433796	-0.00301399	0.223261	-0.169223	0.0870972	-0.0394207	0.521061	-0.203838	NA	0.502573	0.104287	0.227678	0.453087	0.434188	0.313851	0.742774
1223	ATP12A	0.0824019	-0.0626795	-0.0664217	-0.123347	0.0118198	0.0673096	-0.0510033	0.0584056	0.0762137	0.104377	-0.206384	0.0288883	0.238015	-0.0196979	-0.0857698	-0.160923	0.0909091	-0.0672694	0.0549438	-0.180303	-0.11981	-0.0130331	NA	0.287527	0.295348	0.552842	0.237554	0.0980597	0.296369	0.23429
1224	ATP13A1	-0.520722	-0.743137	-0.546456	-0.313947	-0.206667	-0.149958	-1.16106	0.21051	-0.510425	-0.971049	-1.35107	-0.5757	-0.497219	-0.489249	-0.231307	-0.396587	-0.0977604	-0.315573	-0.822621	-0.663652	-0.818444	-0.274469	essential_DepMap	0.310967	1.38124	1.30277	0.59333	0.572554	1.58649	0.723707
1225	ATP13A2	-0.020761	-0.144738	0.00570286	-0.156169	-0.0926278	-0.222035	-0.00607822	-0.24938	-0.19469	-0.059098	0.0469416	-0.0532209	0.0212872	-0.0303492	-0.290814	-0.0215235	-0.216091	0.0308357	-0.105755	-0.183721	-0.0433375	0.0547432	NA	0.453679	0.193806	0.264401	0.341597	0.142855	0.32258	0.291027
1226	ATP13A3	-0.27418	-0.185175	-0.436666	-0.159252	-0.218492	-0.44876	-0.208244	-0.276705	-0.620815	-0.273562	-0.142927	-0.135798	-0.262639	-0.424102	-0.172761	-0.145744	-0.217677	-0.219307	-0.046321	-0.32403	-0.41983	-0.453503	NA	0.636332	0.210331	0.430626	0.251827	0.309405	0.288383	0.796872
1227	ATP13A4	-0.0317602	-0.28057	-0.0581603	-0.0570232	-0.22673	0.10791	0.365053	0.0571901	0.158631	0.295234	0.434872	-0.151219	-0.021378	0.0773166	0.0169257	-0.130972	-0.440909	-0.0125503	-0.313747	-0.247394	0.103686	-0.220007	NA	0.290344	0.840425	0.294136	0.419839	0.57935	0.74773	0.231125
1228	ATP13A5	0.0247496	-0.0488767	-0.202609	0.0115284	-0.172593	0.00816691	0.482334	0.0287072	-0.0123733	0.651779	0.312889	-0.00986945	0.0311472	0.0529712	0.109317	-0.0862598	-0.20195	-0.143237	0.0318062	-0.12956	-0.0513004	-0.353918	NA	0.275	1.02478	0.406714	0.345636	0.572417	0.27252	0.495101
1229	ATP1A1	-1.5027	-1.59928	-2.22335	-1.1276	-1.69969	-1.81933	-1.49649	-2.08063	-1.55803	-1.09137	-1.90161	-1.8071	-1.19405	-1.50695	-0.905571	-1.34962	-1.33017	-2.06921	-1.59383	-1.60473	-1.72622	-2.72048	essential_DepMap	3.0138	2.55971	3.80688	3.37013	3.58033	3.76431	3.44157
1230	ATP1A2	0.0556277	0.164114	0.0636339	0.0702885	-0.0297411	0.0710866	-0.284572	0.145403	-0.00322927	-0.376073	-0.193071	-0.0684201	-0.0278002	0.263103	0.1076	0.0329767	-0.12406	0.064578	0.222643	0.105586	0.0672128	0.060055	NA	0.419708	0.444362	0.50724	0.473531	0.172611	0.801218	0.25418
1231	ATP1A3	-0.0465139	0.141973	-0.125035	-0.346274	-0.0176619	0.00182561	0.454881	0.22912	-0.225469	0.152185	0.757578	0.158752	-0.229136	-0.0691576	-0.274735	-0.417813	-0.0950571	0.0597332	0.246431	0.0375152	-0.152372	-0.0976971	NA	0.281187	0.872364	0.355561	0.49286	0.279357	0.428443	0.241345
1232	ATP1A4	0.141927	0.202138	-0.0265292	0.144482	0.0737473	0.320941	0.0661488	0.141676	0.500206	0.358233	-0.225935	0.161279	0.26743	-0.00292669	0.0283979	0.260566	-0.118592	0.266086	0.210857	0.193419	-0.219235	0.166177	NA	0.644287	0.406758	0.669586	0.8648	0.443571	0.907099	0.43456
1233	ATP1B1	0.0669218	0.00903861	0.103225	0.0117079	0.205898	-0.139961	0.0797265	-0.086117	-0.193806	0.0275114	0.131942	0.0350554	0.159062	0.00664767	0.0399355	-0.0165197	0.316778	0.0950169	0.00749699	0.0105802	-0.0384615	0.244911	NA	0.534372	0.166267	0.312471	0.232084	0.826142	0.351221	0.370076
1234	ATP1B2	0.00828066	-0.0197814	-0.11591	0.171748	-0.180911	0.0510728	-0.162087	-0.0289927	0.131138	-0.357084	0.0329103	-0.000667386	-0.0161955	0.0417049	0.186981	0.156514	-0.359435	-0.00238841	0.0854885	-0.125051	-0.113095	-0.118725	NA	0.333417	0.305645	0.366532	0.824503	0.342079	0.600015	0.274329
1235	ATP1B3	-0.00201955	0.184464	0.315957	-0.0119737	0.0800647	0.185091	-0.167073	0.119018	0.251165	-0.176305	-0.157842	-0.0205616	-0.026188	0.040691	0.0433146	-0.0672619	-0.046766	0.206896	0.331756	0.037172	0.244393	0.387522	NA	0.620069	0.356454	0.430626	0.316917	0.631611	0.529395	1.75601
1236	ATP1B4	0.0331803	-0.0792365	0.115491	-0.163225	0.0812342	-0.275834	-0.295929	-0.292483	-0.259185	-0.696313	0.104454	0.00892004	0.0222944	0.0683264	-0.274222	-0.0522283	0.0564415	0.106027	-0.0502575	-0.108215	0.147088	0.083893	NA	0.226342	0.316196	0.322393	0.254394	0.303687	0.170076	0.502414
1237	ATP23	-0.116655	-0.222216	-0.0312401	0.0288925	0.00898978	0.170349	-0.227833	0.0974034	0.243294	-0.146599	-0.309067	0.0592974	-0.216327	-0.192934	-0.0685706	0.126356	-0.000550588	0.0185301	-0.274655	-0.169778	0.00466814	-0.0671484	NA	0.551247	0.263835	0.289883	0.49114	0.485519	0.458645	0.219093
1238	ATP2A1	0.0299491	-0.0862779	-0.0783701	0.0950876	0.118509	0.106233	-0.208194	0.089331	0.123136	-0.511705	0.0953179	-0.135305	0.215439	0.00971267	0.24237	-0.0521943	-0.138086	0.375103	-0.0469981	-0.125558	-0.13664	-0.0201005	NA	0.384429	0.418028	0.434152	0.563961	0.336615	0.177894	0.372532
1239	ATP2A2	-1.62229	-1.75682	-1.69763	-2.21148	-2.66823	-1.5304	-1.22876	-1.12488	-1.93593	-1.34344	-1.11408	-1.40873	-1.49012	-1.96801	-2.5072	-1.91577	-2.31597	-3.0205	-1.87431	-1.63934	-1.47042	-1.92485	essential_DepMap	1.66407	1.9706	2.51428	3.32586	4.45223	2.75651	3.44511
1240	ATP2A3	-0.264504	0.171221	0.0175095	-0.0883886	0.150155	-0.110958	-0.170201	-0.0422182	-0.179698	-0.799088	0.458687	-0.262868	-0.0819223	-0.448722	-0.157153	-0.0196244	-0.131156	0.431465	0.186125	0.156317	0.325407	-0.290388	NA	0.329327	0.344861	0.374688	0.35861	0.543453	0.584651	0.270531
1241	ATP2B1	-0.422288	-0.196946	-0.330508	-0.501644	-0.198925	0.0811766	-0.0695541	0.0779447	0.0844085	-0.0518676	-0.0872406	-0.204724	-0.781297	-0.280842	-0.41473	-0.588557	-0.322421	-0.0754297	-0.236899	-0.156993	-0.302447	-0.358569	NA	0.309321	0.496012	0.712198	1.14748	0.364878	0.195431	0.585018
1242	ATP2B2	0.000545865	-0.106556	-0.088015	-0.0031961	-0.0834996	0.00774281	0.0181419	-0.335231	0.350716	0.223324	-0.18704	0.00558178	-0.0208087	0.0168646	-0.0093112	0.002919	-0.205162	0.0381632	0.0268891	-0.24	-0.252925	0.0768955	NA	0.446263	0.464225	0.343902	0.395234	0.304501	0.473402	0.276183
1243	ATP2B3	0.272163	0.0119036	0.164826	-0.117358	0.142833	0.309427	0.434339	0.225072	0.393781	0.381526	0.487152	0.122209	0.381271	0.31301	-0.0566645	-0.178051	0.040462	0.245203	-0.0182698	0.0420771	0.541739	-0.212088	NA	0.468962	0.82143	0.821023	0.314809	0.664616	0.568789	0.341819
1244	ATP2B4	0.0554105	0.119191	0.236385	-0.00583116	-0.099705	-0.170117	-0.182816	-0.290029	-0.0502041	-0.198718	-0.166913	-0.00180481	0.160699	0.00733721	-0.0411501	0.0294878	-0.337779	0.138369	0.0767245	0.161658	0.0531614	0.419609	NA	0.250643	0.333707	0.421361	0.421504	0.247364	0.407263	0.669839
1245	ATP2C1	-0.0746802	0.149589	0.0322094	0.0563719	0.126451	0.00948734	0.0311368	0.144497	-0.125522	-0.0610351	0.123309	0.0305751	-0.274547	0.0199309	-0.0742083	0.186952	0.170835	0.0820657	-0.0494874	0.348665	0.13441	-0.0699913	NA	0.399403	0.193237	0.303644	0.361256	0.715073	0.33461	0.407768
1246	ATP2C2	0.0280644	0.0241283	0.136873	-0.0995819	0.0907902	-0.0691463	-0.324545	0.0388436	-0.177136	-0.496732	-0.152357	0.123296	-0.239785	0.200682	-0.130817	-0.0683463	-0.0324135	0.213994	-0.104156	0.152413	0.00627118	0.267475	NA	0.282513	0.682762	0.401209	0.286421	0.319515	0.422388	0.443462
1247	ATP4A	-0.119455	-0.22013	-0.360291	-0.277231	-0.113294	-0.328682	0.0625599	-0.492667	-0.164697	0.286642	-0.161522	0.000288023	-0.229275	-0.129378	-0.233846	-0.320616	-0.160532	-0.066056	-0.18179	-0.258469	-0.962718	0.242136	NA	0.572035	0.400102	0.289037	0.640563	0.22788	0.456982	0.551184
1248	ATP4B	-0.058751	0.0981251	-0.0443168	-0.0503662	-0.123081	-0.00147539	0.00990604	0.206405	-0.209356	-0.170476	0.190288	-0.0346848	-0.174303	0.0327348	0.0661397	-0.166872	-0.15705	-0.089112	0.019391	0.176859	-0.0148085	-0.073825	Nonessential_DepMap	0.432885	0.213657	0.393619	0.212656	0.149531	0.244289	0.29713
1249	ATP5A1	-1.21561	-0.677761	-1.04181	-1.15777	-1.06425	-1.02356	-1.30829	-1.11374	-0.933372	-1.28787	-1.32871	-1.21685	-1.36912	-1.06086	-1.29497	-1.02058	-0.953573	-1.17492	-0.787089	-0.568433	-1.00324	-1.08038	NA	2.03034	3.05565	3.97469	3.59844	2.56771	2.26535	1.87393
1250	ATP5B	-0.922212	-0.714143	-0.939223	-1.24436	-0.932034	-1.22085	-0.741831	-0.868645	-1.57305	-0.742961	-0.740701	-1.20032	-0.867175	-0.699146	-1.11219	-1.37654	-1.46504	-0.399029	-0.881654	-0.546631	-0.818444	-1.06	NA	2.19192	0.830664	2.88606	1.83872	1.70799	1.0752	1.32992
1251	ATP5C1	-0.692651	-0.603603	-0.268372	-0.784166	-0.56501	-0.50184	-1.30044	-0.325885	-0.677794	-1.13199	-1.46888	-0.695383	-0.808796	-0.573773	-0.896095	-0.672236	-0.513641	-0.616379	-0.546879	-0.660327	-0.376918	-0.159826	NA	0.734188	2.05135	1.64975	1.35347	1.09066	1.11278	0.466328
1252	ATP5D	-0.797909	-0.549922	-0.592761	-0.940171	-0.5281	-0.589965	-0.896541	-0.766317	-0.413613	-0.772667	-1.02041	-0.79255	-0.853392	-0.747783	-0.77464	-1.1057	-0.409327	-0.646872	-0.163661	-0.936184	-0.670202	-0.515321	NA	0.73901	1.32987	2.73049	3.74785	1.42488	0.540552	1.03899
1253	ATP5E	-0.92881	-0.543903	-0.869342	-0.887757	-0.465572	-0.944979	-0.835302	-1.31592	-0.574037	-0.957663	-0.712941	-0.932761	-0.870554	-0.983114	-1.17065	-0.604863	-0.526888	-0.404257	-0.586607	-0.501199	-1.05154	-0.687146	NA	1.36437	1.30023	2.55596	2.41335	1.04772	1.27192	1.78232
1254	ATP5F1	-0.291171	-0.140993	0.105568	-0.436505	-0.383581	-0.432279	-0.521624	-0.314889	-0.549669	-0.522274	-0.520974	-0.147932	-0.290118	-0.435462	-0.764747	-0.108264	-0.405179	-0.361983	0.0835161	-0.365501	0.309794	-0.0986576	NA	0.890651	0.71731	0.661544	0.612642	0.676047	0.773568	0.413914
1255	ATP5G1	-0.46685	-0.451588	-1.50768	-0.810625	-0.607081	-0.0189256	-0.859054	-0.240448	0.202597	-1.16133	-0.556778	-0.950829	-0.323701	-0.126021	-1.07458	-0.546665	-0.873137	-0.341025	-0.664812	-0.238363	-2.54075	-0.474604	NA	0.3393	1.14144	0.657577	1.15326	1.10112	0.775532	1.06481
1256	ATP5G2	-0.363205	-0.481896	-0.364123	-0.268637	-0.144058	-0.693408	-0.569624	-0.773644	-0.613173	-0.606184	-0.533064	-0.449103	-0.410287	-0.230224	-0.248668	-0.288607	-0.220235	-0.0678806	-0.42065	-0.543142	-0.309194	-0.419052	NA	1.15473	0.855768	0.829738	0.530686	0.505459	0.8189	0.545102
1257	ATP5G3	-0.445292	-0.243085	-0.472269	-0.178797	-0.770987	-0.429702	-0.393377	-0.756501	-0.102903	-0.563249	-0.223506	-0.445443	-0.371238	-0.519194	-0.0218346	-0.335759	-0.618915	-0.923059	-0.206886	-0.279284	-0.475586	-0.468951	NA	0.573461	0.456162	0.962574	0.246505	1.48189	0.60925	0.77253
1258	ATP5H	-1.03716	-0.647732	-0.970196	-1.22171	-0.978241	-0.764374	-0.555514	-1.27831	-0.250438	-1.26756	0.156532	-0.853355	-1.32738	-0.930744	-1.34264	-1.10077	-1.59768	-0.358805	-0.298003	-0.997462	-0.740224	-1.20017	NA	0.485179	0.437187	2.49485	3.4975	1.40322	0.644436	1.60391
1259	ATP5I	-0.815211	-0.69689	-0.23269	-0.727847	-0.45115	-0.819378	-1.09981	-0.864884	-0.773873	-1.48282	-0.716794	-1.0111	-0.662646	-0.771887	-0.875833	-0.579862	-0.562779	-0.339522	-1.08736	-0.306419	-0.307126	-0.158254	NA	1.51832	1.11735	2.15989	1.20018	0.637734	0.858531	0.263703
1260	ATP5J	-0.54288	-0.304025	-0.192821	-0.354338	-0.235294	-0.528762	-0.745764	-0.801932	-0.255593	-0.858281	-0.633246	-0.694189	-0.409134	-0.525317	-0.688286	-0.020391	-0.218571	-0.252016	-0.29724	-0.310809	-0.130995	-0.254647	NA	0.394006	1.05217	0.879426	0.649139	0.488103	0.37459	0.256067
1261	ATP5J2	-0.965272	-0.66267	-0.771953	-0.95612	-1.01732	-0.950822	-2.00575	-0.653119	-1.24852	-2.47657	-1.53494	-0.91896	-1.13548	-0.841379	-1.07804	-0.8342	-0.272226	-1.76241	-0.888858	-0.436482	-0.904079	-0.639828	NA	1.32555	2.88989	1.65561	1.70572	0.901894	0.857701	1.34079
1262	ATP5J2-PTCD1	-0.555846	-0.319134	-0.469856	-0.48808	-0.84218	-1.05284	-0.916227	-1.38495	-0.720727	-0.662024	-1.17043	-0.719751	-0.448515	-0.499273	-0.457735	-0.518425	-0.877567	-0.806794	-0.371018	-0.26725	-0.971229	0.0315176	NA	0.97777	1.21295	1.21968	0.810327	1.81085	0.445868	0.544362
1263	ATP5L	-0.143355	-0.113605	-0.0300154	-0.290755	-0.0521506	-0.366894	0.259082	-0.668885	-0.0649031	0.128075	0.39009	-0.304571	-0.0602573	-0.0652359	-0.479064	-0.102445	-0.000484352	-0.103817	0.0139913	-0.241201	-0.242701	0.182671	NA	0.46093	0.484848	0.297569	0.467979	0.23616	0.452644	0.33351
1264	ATP5L2	-0.196266	0.0723114	0.0681515	-0.262385	-0.457356	-0.0325489	0.102416	-0.0780215	0.0129237	-0.299291	0.504123	-0.223885	-0.436024	0.0711128	-0.192189	-0.332581	-0.734704	-0.180008	0.00176295	0.14286	-0.179791	0.316094	NA	0.528789	0.457554	0.308919	0.444573	0.747547	0.456157	0.772075
1265	ATP5O	-0.749858	-0.487677	-0.327649	-0.840468	-0.428131	-0.902462	-1.09099	-0.797666	-1.00726	-0.842561	-1.33943	-0.795684	-0.902361	-0.551529	-0.681849	-0.999087	-0.483503	-0.37276	-0.649823	-0.325531	-0.356617	-0.298681	NA	2.52783	1.7953	2.9431	2.1526	0.764207	1.11218	0.488337
1266	ATP5S	-0.168178	-0.113549	-0.049136	-0.161214	0.00475697	-0.296425	-0.0909499	-0.412458	-0.180391	-0.0860479	-0.095852	-0.210391	-0.222523	-0.071621	-0.212922	-0.109506	0.038388	-0.028874	-0.277334	0.0502355	0.00920052	-0.107472	NA	0.285721	0.151506	0.238824	0.250264	0.409403	0.315684	0.142812
1267	ATP6AP1	-0.967763	-1.54824	-1.68937	-1.82122	-1.83675	-1.64231	-1.96825	-0.967544	-2.31707	-1.68174	-2.25477	-1.27039	-0.623669	-1.00923	-0.997646	-2.64479	-1.56742	-2.10608	-1.72141	-1.37507	-0.929821	-2.44893	NA	1.30977	2.90507	1.82681	1.81637	2.35262	2.99189	2.44984
1268	ATP6AP1L	0.0372763	-0.139276	-0.0219117	-0.182858	-0.0787831	-0.203588	-0.227627	-0.257923	-0.149252	-0.0267277	-0.428527	-0.0471291	-0.0293634	0.188321	-0.0368854	-0.32883	-0.0326958	-0.12487	-0.0542814	-0.22427	-0.150649	0.106826	NA	0.242638	0.290412	0.326979	0.325267	0.155974	0.16895	0.39277
1269	ATP6AP2	-0.927326	-1.20965	-1.18774	-1.23419	-1.53844	-1.32987	-1.38382	-1.51899	-1.14074	-1.82759	-0.940051	-0.729012	-1.16271	-0.890257	-1.27214	-1.19624	-0.930597	-2.14628	-1.13268	-1.28662	-1.47527	-0.900214	essential_DepMap	1.72934	1.69608	2.00218	1.72974	2.46998	2.17285	2.22711
1270	ATP6V0A1	-0.221789	-0.264058	-0.101864	-0.191015	-0.203995	0.0513973	-0.382558	-0.250733	0.353528	-0.502514	-0.262602	-0.275796	-0.102365	-0.287207	-0.123678	-0.258351	-0.326432	-0.081557	-0.248461	-0.279655	-0.102842	-0.100885	NA	0.606162	0.581442	0.500313	0.468885	0.31942	0.426519	0.253549
1271	ATP6V0A2	0.0525972	-0.206246	0.0766739	0.0490659	-0.118683	-0.216635	0.287718	0.28956	-0.72283	0.548514	0.0269225	0.127129	-0.193009	0.223671	0.129472	-0.03134	-0.366547	0.12918	-0.151749	-0.260743	0.122714	0.0306341	NA	0.535056	0.366174	0.459671	0.435837	0.403755	0.403601	0.489448
1272	ATP6V0A4	0.047238	-0.0428278	0.147264	-0.147909	0.0319191	0.301964	0.105437	0.423008	0.18092	0.0993107	0.111563	-0.0252167	0.115282	0.0516485	0.1943	-0.490118	0.375745	-0.311907	0.07236	-0.158015	-0.017186	0.311715	NA	0.742285	0.25125	0.340084	0.330662	0.307593	0.375909	0.374801
1273	ATP6V0B	-1.42954	-1.26608	-1.67618	-2.12612	-1.91761	-1.60323	-2.09898	-1.35812	-1.84833	-1.97561	-2.22235	-1.66595	-1.18213	-1.44055	-2.33574	-1.9165	-2.98205	-0.853158	-1.2567	-1.27546	-2.3548	-0.997561	essential_DepMap	3.57199	4.05205	4.04769	3.18307	2.19405	2.93641	2.27629
1274	ATP6V0C	-1.44588	-1.57162	-1.50034	-2.06685	-2.11703	-2.01735	-2.77789	-2.14828	-1.88642	-3.52486	-2.03093	-1.47914	-1.29696	-1.56154	-1.65916	-2.47454	-1.83712	-2.39693	-1.85941	-1.28383	-1.42917	-1.57151	essential_DepMap	5.63771	3.94887	4.75449	5.55083	3.21846	4.03241	2.95986
1275	ATP6V0D1	-1.49917	-1.57389	-0.930687	-1.68836	-1.42919	-1.32518	-1.14174	-1.27017	-1.38019	-1.26787	-1.0156	-1.24212	-1.72595	-1.52944	-1.87287	-1.50385	-1.69678	-1.16159	-1.16402	-1.98377	-0.948097	-0.913277	essential_DepMap	2.00334	1.47893	2.16178	2.66619	2.28468	1.83967	1.312
1276	ATP6V0D2	-0.155585	0.161401	0.0677709	-0.00271477	-0.0789405	0.201363	0.507583	0.181385	0.221341	0.760781	0.254385	-0.206677	-0.147778	-0.1123	-0.0327132	0.0272836	-0.0587837	-0.0990972	0.417487	-0.094685	0.160612	-0.0250703	NA	0.596802	0.692467	0.247184	0.123488	0.269468	0.578106	0.414505
1277	ATP6V0E1	-0.213321	-0.106667	0.122045	0.000358304	-0.448659	-0.0657977	0.060838	0.18213	-0.313725	0.143336	-0.0216601	-0.120828	-0.31125	-0.207886	0.0327483	-0.0320317	-0.344382	-0.552935	0.0321209	-0.245456	0.121904	0.122187	NA	0.262072	0.406487	0.379864	0.316008	1.45283	0.322439	0.530171
1278	ATP6V0E2	0.284249	-0.0838026	0.341802	0.0861839	3.34233e-05	0.00552443	0.334758	-0.0798963	0.0909451	0.313017	0.3565	0.362068	0.176582	0.314097	0.130294	0.0420735	0.0201316	-0.0200648	-0.0123854	-0.15522	0.565602	0.118002	NA	0.389414	0.629274	0.906578	0.3145	0.569304	0.446785	0.729701
1279	ATP6V1A	-1.30135	-1.45746	-1.82824	-1.22347	-1.53128	-1.26421	-1.27259	-1.16985	-1.35857	-1.45784	-1.08734	-1.24119	-1.49847	-1.1644	-1.07345	-1.37349	-2.0054	-1.05715	-1.6707	-1.24422	-1.77938	-1.8771	essential_DepMap	2.47499	2.89694	4.44491	3.05087	2.64617	4.70609	3.07924
1280	ATP6V1B1	0.0904997	-0.0256674	-0.137025	0.0398046	-0.0448487	0.101395	0.498187	-0.181835	0.384625	0.398461	0.597914	0.0305351	0.0461029	0.194861	0.00770033	0.0719089	0.0315698	-0.121267	0.0226574	-0.0739922	-0.218275	-0.0557757	NA	0.421444	0.928499	0.348722	0.478868	0.62638	0.239178	0.226316
1281	ATP6V1B2	-2.16215	-1.37279	-2.4878	-3.17796	-2.4041	-2.11645	-1.94158	-2.45547	-1.77744	-2.75175	-1.1314	-1.74909	-2.8136	-1.92376	-2.01727	-4.33865	-1.78566	-3.02254	-1.61999	-1.12559	-2.51459	-2.46101	NA	1.81314	1.7389	4.00305	3.69305	4.13902	2.13854	3.33297
1282	ATP6V1C1	-1.01334	-1.01425	-0.502054	-1.17369	-0.961174	-1.1265	-1.28962	-1.24014	-1.01286	-1.23285	-1.3464	-1.54681	-0.831326	-0.661869	-1.02649	-1.32088	-1.22982	-0.692528	-0.894034	-1.13446	-0.799489	-0.204619	NA	1.85395	1.80949	2.28567	2.0019	2.28212	1.76838	0.972122
1283	ATP6V1C2	0.12078	-0.0504023	-0.0361274	-0.110204	0.0842345	0.110682	0.0255922	-0.253692	0.475057	0.22134	-0.170155	0.232124	-0.00560126	0.135817	0.0304718	-0.25088	-0.0820707	0.25054	-0.190316	0.0895118	-0.121654	0.0493989	NA	0.511334	0.347696	0.463442	0.347082	0.793547	0.312057	0.395644
1284	ATP6V1D	-1.42336	-1.51766	-1.35476	-2.73431	-2.49945	-1.19436	-1.24789	-0.900269	-1.48846	-1.10273	-1.39305	-1.66655	-1.07604	-1.5275	-2.42847	-3.04014	-3.20978	-1.78911	-1.30489	-1.73043	-0.985484	-1.72403	essential_DepMap	2.01634	2.24311	2.78516	3.54702	3.53966	2.91298	2.27648
1285	ATP6V1E1	-1.20504	-0.823631	-0.701276	-1.41682	-1.74619	-1.45518	-1.73267	-1.07741	-1.83295	-1.80245	-1.66289	-1.28386	-1.0826	-1.24866	-1.26976	-1.56389	-2.00577	-1.4866	-0.580872	-1.06639	-0.707275	-0.695277	essential_DepMap	2.18279	2.34354	3.38091	2.78921	4.15308	1.94813	1.30573
1286	ATP6V1E2	0.18121	-0.00859529	-0.141727	-0.0997193	-0.16919	0.132451	-0.230673	0.136046	0.128855	-0.152078	-0.309268	0.290076	0.093541	0.160015	-0.0690205	-0.130418	0.0332754	-0.371656	0.060938	-0.0781286	-0.324034	0.0405802	NA	0.521578	0.282122	0.850781	0.407041	0.427088	0.251653	0.292068
1287	ATP6V1F	-1.24439	-0.639631	-1.22015	-0.764337	-0.544921	-1.2725	-1.41985	-1.24231	-1.30269	-1.75077	-1.08892	-1.16598	-1.30458	-1.26262	-0.728632	-0.800042	-0.835051	-0.254791	-0.897601	-0.381661	-1.73797	-0.702323	NA	2.18069	2.12151	2.14146	1.8709	1.98012	1.65558	2.01151
1288	ATP6V1G1	-1.62675	-1.48275	-1.30948	-1.12343	-2.40105	-1.58312	-1.39434	-1.50042	-1.66581	-1.14872	-1.63996	-1.25092	-1.43459	-2.19475	-1.0933	-1.15356	-3.23189	-1.5702	-0.979296	-1.9862	-0.895202	-1.72376	essential_DepMap	3.47406	2.56792	2.76447	1.90846	2.47895	1.67779	1.51939
1289	ATP6V1G2	0.119187	0.0442901	-0.23888	0.0575021	0.168211	0.326314	0.19782	0.200052	0.452575	0.001388	0.394252	0.0689715	0.163979	0.124611	0.112207	0.00279723	0.36097	-0.0245475	-0.129665	0.218245	-0.254126	-0.223633	NA	0.961982	0.381675	0.580044	0.489712	0.734965	0.400324	0.268013
1290	ATP6V1G3	0.0120994	0.0856219	0.257368	-0.0154018	0.0778968	0.00877116	0.116349	-0.0162361	0.0337784	0.150722	0.0819767	-0.000833399	0.0488197	-0.011688	0.0318782	-0.0626819	0.157033	-0.00123993	0.121881	0.0493632	0.34045	0.174286	Nonessential_DepMap	0.247007	0.316377	0.262807	0.228431	0.380641	0.584392	0.834699
1291	ATP6V1H	-1.52546	-1.5493	-0.858248	-1.62581	-1.22026	-1.3491	-1.0161	-1.1809	-1.5173	-1.56041	-0.471792	-1.50434	-1.80222	-1.26981	-1.30719	-1.94444	-0.579794	-1.86072	-1.42729	-1.6713	-0.862462	-0.854034	NA	2.83168	1.04278	3.15181	4.04583	1.48805	2.78751	1.4951
1292	ATP7A	-0.189202	-0.0715803	0.117393	-0.0744322	0.0495414	-0.0930692	0.230083	-0.159821	-0.0263178	0.195035	0.265131	-0.24444	-0.103448	-0.219717	-0.11782	-0.0310447	0.139357	-0.0402739	-0.0602213	-0.0829393	0.17375	0.061036	NA	0.453094	0.43017	0.446117	0.130384	0.310815	0.540773	0.430977
1293	ATP7B	-0.00265615	0.0768595	0.0705105	-0.103747	-0.104411	0.283499	0.302571	0.266857	0.300141	0.359175	0.245967	-0.0972497	-0.0335572	0.122838	-0.0915739	-0.115921	-0.0936372	-0.115185	0.0846282	0.0690907	-0.0472704	0.188291	NA	0.862409	0.576771	0.251037	0.457673	0.418289	0.409738	0.421728
1294	ATP8A1	0.0515099	0.0692631	0.212543	0.019722	0.190122	0.138124	-0.12771	0.163302	0.112946	-0.477214	0.221794	-0.065042	0.105468	0.114103	0.0882615	-0.0488175	0.2769	0.103344	0.0816696	0.0568566	0.356711	0.068375	NA	0.387661	0.361406	0.341989	0.486949	0.632371	0.403986	0.638272
1295	ATP8A2	-0.273476	-0.221769	-0.00628372	-0.3317	-0.00129244	-0.548831	-0.29731	-0.293401	-0.804261	-0.235467	-0.359154	-0.241633	-0.287667	-0.291128	-0.389241	-0.274158	0.0652136	-0.0677985	-0.0948828	-0.348655	-0.10639	0.0938228	NA	0.476865	0.38146	0.709965	0.823259	0.228593	0.276122	0.336082
1296	ATP8B1	0.141308	0.14544	0.157142	0.1334	0.13581	-0.0620828	0.262075	-0.0370915	-0.0870741	0.426991	0.0971581	0.118375	0.235577	0.0699714	0.109269	0.157531	0.191629	0.0799911	0.240366	0.0505144	-0.0719421	0.386226	NA	0.466654	0.382805	0.863279	0.920506	0.471295	0.715394	0.451402
1297	ATP8B2	-0.097955	0.109996	0.0579178	0.00539771	0.0705043	0.0419375	-0.222974	-0.244324	0.328199	0.0773253	-0.523274	-0.0773561	-0.0428646	-0.173644	0.031771	-0.0209755	0.0321949	0.108814	-0.0871595	0.307151	-0.0540162	0.169852	NA	0.548776	0.678195	0.178486	0.419794	0.440285	0.507785	0.514456
1298	ATP8B3	-0.0100469	0.338316	0.127183	0.0107377	-0.0293418	-0.311442	-0.200524	-0.65485	0.0319652	-0.146389	-0.254659	-0.0930634	0.039185	0.0237378	0.258991	-0.237515	-0.0553912	-0.00329237	0.41678	0.259852	0.170257	0.0841098	NA	0.337255	0.229793	0.173925	0.465472	0.203048	0.926957	0.487616
1299	ATP8B4	-0.00350352	0.0399437	0.232254	0.196791	0.0416958	-0.278696	0.110551	-0.169384	-0.388008	0.0929914	0.12811	0.153572	-0.152356	-0.0117256	0.34662	0.0469628	-0.187552	0.270943	0.0789907	0.000896641	0.333281	0.131228	NA	0.280159	0.861571	0.353596	0.799129	0.374327	0.286337	0.552733
1300	ATP9A	-0.059008	0.0209324	-0.17303	-0.0353883	-0.0582272	0.436399	-0.056842	0.165114	0.707684	0.200623	-0.314307	-0.0758494	-0.0764397	-0.0247349	0.0451561	-0.115933	0.169867	-0.286321	0.227595	-0.18573	-0.322159	-0.0239006	NA	0.819676	0.18504	0.207608	0.215747	0.423797	0.29026	0.287384
1301	ATP9B	0.236519	0.408821	0.455202	0.262032	0.122189	0.155234	0.314437	0.284274	0.0261928	0.113918	0.514956	0.326599	0.32873	0.0542267	0.33333	0.190733	0.149723	0.0946544	0.50861	0.309032	0.559127	0.351277	NA	1.01133	0.814083	0.756962	1.06969	0.215376	1.32196	1.10169
1302	ATPAF1	-0.0727391	-0.508878	-0.266236	-0.0296633	0.0532375	-0.185147	-0.057518	-0.110436	-0.259858	-0.0933113	-0.0217248	-0.111061	-0.246418	0.139261	0.0150544	-0.074381	-0.196357	0.302832	-0.673255	-0.344501	-0.430059	-0.102413	NA	0.448739	0.41294	0.221126	0.611615	0.285856	0.654405	0.271411
1303	ATPAF2	-0.106529	-0.131817	-0.117155	-0.249741	-0.0380133	-0.426469	-0.0221087	-0.611151	-0.241786	0.276401	-0.320618	-0.226412	0.0504166	-0.143592	-0.286511	-0.212971	-0.0724151	-0.00361147	0.0977708	-0.361404	-0.0840714	-0.150238	NA	0.719203	0.289616	0.324222	0.63298	0.167788	0.441016	0.171946
1304	ATPIF1	-0.12118	-0.141819	0.0772339	-0.0556981	-0.0429871	0.0987257	0.0428014	0.174895	0.0225568	-0.16025	0.245852	-0.0285836	-0.113085	-0.221872	-0.133553	0.0221568	-0.144978	0.0590042	-0.174684	-0.108954	0.0393815	0.115086	NA	0.373003	0.365372	0.316053	0.369074	0.784402	0.178519	0.390235
1305	ATR	-0.842831	-0.474352	-0.283681	-0.830014	-0.415234	-0.907842	-1.53159	-1.54755	-0.268137	-2.01156	-1.05161	-0.846488	-0.788056	-0.89395	-0.935488	-0.72454	-0.433031	-0.397437	-0.301605	-0.6471	-0.245944	-0.321418	essential_DepMap	0.648029	1.72476	1.29328	1.20347	0.860889	0.835589	0.512296
1306	ATRAID	0.197386	-0.0809657	-0.117698	0.0856531	-0.254519	0.165075	-0.159834	0.238821	0.0913296	0.13332	-0.452988	0.224317	0.140442	0.227398	0.0361095	0.135197	-0.294242	-0.214796	-0.175579	0.0136477	-0.152451	-0.082945	NA	0.464497	0.475942	0.801343	0.561402	0.356306	0.214201	0.303788
1307	ATRIP	-0.534271	-0.604038	-1.39604	-0.630424	-0.543417	-0.480172	-0.822952	-0.741159	-0.219185	-0.937507	-0.708398	-0.57744	-0.298673	-0.726701	-0.502759	-0.758089	-1.04353	-0.0433035	-0.684726	-0.52335	-1.63923	-1.15285	essential_DepMap	1.28293	1.23486	1.36552	1.54519	0.492569	1.4252	2.47149
1308	ATRN	0.215037	0.309392	0.284004	0.25218	0.0470575	0.278957	0.288699	0.140919	0.416996	0.182887	0.394511	0.119175	0.338749	0.187187	0.189675	0.314684	0.00233068	0.0917843	0.409212	0.209572	0.0383738	0.529634	NA	0.513291	0.683952	0.739929	1.15713	0.159505	0.920625	1.24035
1309	ATRNL1	-0.0481993	-0.0605393	-0.0641438	-0.109807	-0.0191502	-0.00577439	0.167327	0.083334	-0.0948827	0.0849988	0.249655	0.0012761	-0.00333637	-0.142538	-0.0993588	-0.120256	-0.0852865	0.0469862	-0.131623	0.0105445	0.0817133	-0.210001	NA	0.290743	0.365729	0.338187	0.182174	0.273925	0.249843	0.217771
1310	ATRX	-0.353617	-0.270046	-0.364939	-0.439127	-0.419961	-0.347986	-0.606312	-0.451433	-0.244538	-1.2906	0.0779729	-0.417354	-0.107053	-0.536443	-0.329378	-0.548876	-0.181011	-0.658911	-0.322952	-0.217141	-0.220405	-0.509472	essential_DepMap	0.457367	0.3783	0.498941	1.34674	0.764053	0.400778	0.577566
1311	ATXN1	0.0671721	0.0514815	-0.711764	0.0373204	0.178939	0.119446	-0.124436	0.135186	0.103706	-0.198057	-0.0508155	0.195001	-0.126355	0.132869	-0.0123321	0.0869728	0.0750704	0.282807	0.0276445	0.0753186	-0.925905	-0.497624	NA	0.227521	0.219762	0.512862	0.337691	0.893996	0.852826	0.944285
1312	ATXN10	-0.784001	-0.949095	-0.904559	-0.892827	-0.652185	-0.673838	-0.610735	-0.856788	-0.490887	-0.28796	-0.933509	-0.727212	-0.493296	-1.1315	-0.560304	-1.22535	-0.723775	-0.580596	-0.975519	-0.92267	-0.926845	-0.882273	NA	1.15638	0.840377	1.54212	2.00216	1.77876	2.02083	1.84021
1313	ATXN1L	0.0353139	-0.00790087	-0.0349189	0.00544314	0.1696	-0.0705988	0.182262	0.0813273	-0.222525	0.201673	0.162851	0.0715517	0.0864839	-0.0520938	0.105759	-0.0948725	0.190599	0.1486	-0.126757	0.110955	-0.145161	0.0753237	NA	0.446675	0.346937	0.534617	0.955325	0.553502	0.383545	0.279617
1314	ATXN2	-0.162125	-0.0925546	0.0706119	-0.0284017	0.0309966	-0.299782	-0.0945106	-0.296485	-0.303079	-0.203092	0.0140708	-0.430615	-0.101413	0.0456528	0.134138	-0.190941	-0.0300368	0.09203	-0.237032	0.051923	0.00937283	0.131851	NA	0.243155	0.293457	0.266803	0.27399	0.337384	0.370224	0.305987
1315	ATXN2L	-0.306014	-0.686513	-0.546809	-0.388488	-0.506313	-0.617567	-0.15529	-0.562315	-0.67282	0.203479	-0.514059	-0.303758	-0.222351	-0.391934	-0.264305	-0.512671	-0.527509	-0.485117	-0.46959	-0.903436	-0.363869	-0.729749	NA	0.771279	0.472273	0.505845	0.845928	0.833008	1.03476	0.66916
1316	ATXN3	0.0955178	0.0196858	-0.236225	0.344653	0.0957636	-0.204142	-0.224232	-0.187909	-0.220374	0.0493785	-0.497842	-0.00522775	0.302106	-0.0103243	0.229902	0.459405	0.0307253	0.160802	-0.199423	0.238795	0.0303116	-0.502762	NA	0.793998	0.639871	1.33348	1.06727	0.638423	0.480796	0.275626
1317	ATXN3L	0.11795	-0.100233	0.111913	-0.000526024	-0.0571151	-0.145832	-0.31236	0.00335226	-0.295017	-0.255165	-0.369555	0.135057	-0.00790591	0.226699	-0.0663667	0.0653147	-0.0774855	-0.0367447	0.0139284	-0.214395	0.254539	-0.0307133	NA	0.113712	0.445674	0.562249	0.223909	0.502815	0.247806	0.572595
1318	ATXN7	0.395459	0.23011	0.223722	0.0763454	0.346221	-0.013292	0.45797	0.0365732	-0.0631572	0.440354	0.475586	0.441588	0.291729	0.45306	-0.0782108	0.230901	0.383569	0.308872	0.122874	0.337347	0.187363	0.260082	NA	0.250229	1.048	1.64975	0.668623	1.68362	0.83381	0.920855
1319	ATXN7L1	0.0859532	0.186358	0.145416	0.139146	0.149262	0.0762388	0.153592	0.186075	-0.033597	-0.0433503	0.350534	0.0540636	0.0890748	0.114721	0.19362	0.0846712	0.115102	0.183422	0.18511	0.187606	0.0666489	0.224184	NA	0.510027	0.396739	0.496209	0.882679	0.441862	0.730756	0.465339
1320	ATXN7L2	-0.45008	-0.724994	-0.7873	-0.764185	-0.947125	-0.493564	-1.38352	-0.31271	-0.674418	-0.976264	-1.79077	-0.36723	-0.556571	-0.426438	-1.04711	-0.481259	-0.767904	-1.12635	-0.506367	-0.94362	-0.346085	-1.22852	NA	0.470326	1.82584	0.764472	1.891	2.04199	1.04432	1.0106
1321	ATXN7L3	-0.664289	-0.268218	-0.995307	-0.408516	-0.492976	-0.578703	-0.462124	-0.548463	-0.608943	-0.565474	-0.358773	-0.517028	-0.790243	-0.685597	-0.297888	-0.519144	-0.460428	-0.525525	-0.260156	-0.276281	-1.12422	-0.866392	NA	1.00107	0.528437	1.23359	0.668425	1.18095	0.374009	1.41955
1322	ATXN7L3B	0.111128	-0.0312945	-0.299595	0.0264497	-0.0020354	0.00265762	0.151444	0.0141091	-0.00879382	0.197743	0.105144	-0.0193835	0.0157012	0.337066	0.180456	-0.127556	0.123212	-0.127282	0.0922731	-0.154862	-0.487941	-0.11125	NA	0.428111	0.259176	0.329754	0.375795	0.402766	0.317747	0.44935
1323	AUH	0.0297823	-0.0394467	-0.069053	0.166389	0.0205983	0.208399	0.291587	0.3005	0.116299	0.373743	0.20943	0.141311	-0.0493847	-0.0025789	0.0313121	0.301465	-0.0903287	0.131525	-0.134585	0.0556911	0.0206307	-0.158737	NA	0.537415	0.679303	0.462181	0.8098	0.223175	0.186923	0.277885
1324	AUNIP	0.0997206	-0.194936	0.0793906	0.0482422	0.236654	-0.246408	-0.238349	-0.451685	-0.0411309	-0.056445	-0.420253	0.0594107	0.161474	0.0782767	0.0886608	0.00782359	0.338554	0.134754	-0.382034	-0.00783882	0.322911	-0.16413	NA	0.499866	0.323411	0.279841	0.344022	1.01933	0.310172	0.725481
1325	AUP1	-0.296367	-0.500613	-0.810673	-0.582898	-0.176023	-0.396071	-0.476771	-0.312298	-0.479845	-0.326786	-0.626755	-0.226125	-0.470614	-0.192363	-0.355951	-0.809845	-0.146436	-0.20561	-0.52549	-0.475737	-0.850296	-0.771051	NA	0.443251	0.643687	0.460924	0.770796	0.276766	0.774962	1.44222
1326	AURKA	-1.34189	-1.46351	-2.39949	-0.732323	-1.94537	-0.749278	-2.41075	-0.551594	-0.946962	-2.97114	-1.85036	-1.14931	-0.94795	-1.9284	-0.348591	-1.11605	-2.92964	-0.961092	-1.13688	-1.79014	-3.56152	-1.23746	NA	0.719126	2.41404	2.04964	0.825301	2.00166	2.03332	2.18665
1327	AURKAIP1	-0.408239	-0.206384	-0.828343	-0.5543	-0.234516	-0.151827	-0.379281	-0.271327	-0.0323269	-0.703029	-0.0555323	-0.440122	-0.502699	-0.281896	-0.382173	-0.726427	-0.164961	-0.304071	-0.189127	-0.22364	-0.647905	-1.00878	NA	0.380281	0.511272	0.863279	1.35522	0.70645	0.220115	1.12003
1328	AURKB	-1.23038	-1.39558	-1.50829	-1.59437	-1.09237	-0.953348	-1.62411	-0.758336	-1.14836	-1.40477	-1.84346	-1.15845	-1.52756	-1.00514	-1.26434	-1.92441	-1.31601	-0.868738	-1.32678	-1.46437	-1.33982	-1.67677	NA	1.3321	2.57491	3.767	4.89347	1.57638	3.69249	2.92806
1329	AURKC	-0.319601	-0.447176	-0.413422	-0.245337	-0.670224	0.0420192	-0.159327	0.0973117	-0.0132733	-0.100826	-0.217827	-0.32314	-0.374392	-0.261271	-0.17077	-0.319904	-0.171278	-1.16917	-0.499806	-0.394546	-0.306776	-0.520069	NA	0.44127	0.523038	0.90309	0.592677	0.565548	1.08987	0.758737
1330	AUTS2	-0.0388369	-0.0398448	0.142374	0.033322	0.275375	-0.0967588	0.298476	-0.254231	0.0607132	0.921566	-0.324615	0.0613709	0.0935608	-0.271442	0.0243513	0.0422927	0.371398	0.179352	0.0786619	-0.158352	-0.0622628	0.347011	NA	0.524583	0.496284	0.343902	1.05503	0.648318	0.252884	0.4504
1331	AVEN	-0.0194595	0.115486	-0.236657	-0.119533	-0.0203643	0.185331	0.379478	0.524178	-0.153515	0.405317	0.353639	-0.00947675	-0.112005	0.0631028	-0.105171	-0.133895	0.0480667	-0.0887954	0.109605	0.121366	-0.497282	0.0239673	NA	0.347733	0.847803	0.183759	0.258388	0.369938	0.538231	0.322046
1332	AVIL	-0.190099	-0.13933	0.055187	-0.103949	0.0586722	-0.0953934	-0.00977844	0.134498	-0.325285	-0.314677	0.29512	-0.177528	-0.143086	-0.249682	-0.117677	-0.0902218	0.045289	0.0720554	-0.164269	-0.11439	0.0376845	0.0726894	NA	0.390795	0.360095	0.484126	0.149421	0.179542	0.22629	0.223506
1333	AVL9	0.0740248	-0.121793	-0.138696	0.182383	0.236341	0.062527	-0.00316774	-0.0837068	0.208761	0.00423327	-0.0105688	0.122169	0.0441614	0.0557441	0.218323	0.146443	0.302223	0.170458	-0.117825	-0.125761	0.12792	-0.405312	NA	0.444584	0.311109	0.549751	0.766687	0.647123	0.465111	0.48258
1334	AVP	-0.116989	0.244491	-0.8206	-0.122016	0.0384059	0.144397	0.350857	0.164036	0.124758	0.204592	0.497122	0.170786	-0.222225	-0.299528	-0.0917234	-0.152308	0.015433	0.0613787	0.186313	0.302668	-0.96679	-0.674409	NA	0.620332	0.782964	0.293282	0.189213	0.445075	0.710392	1.39031
1335	AVPI1	0.0504976	-0.0104173	-0.0236829	-0.0569179	0.17756	-0.243857	-0.0990869	-0.317446	-0.170268	-0.120519	-0.0776552	0.0810391	0.0815406	-0.0110871	-0.114536	0.00070022	0.0783822	0.276738	0.148578	-0.169413	-0.143872	0.0965058	NA	0.304496	0.369084	0.510042	0.44074	0.586294	0.412025	0.396956
1336	AVPR1A	-0.0927453	-0.0290206	-0.327175	-0.0867592	0.0210083	-0.268095	0.0393844	-0.257659	-0.278531	-0.0235073	0.102276	-0.107486	-0.098966	-0.0717842	-0.027939	-0.145579	-0.130224	0.172241	-0.0234296	-0.0346115	-0.594384	-0.0599661	NA	0.413182	0.225976	0.227678	0.192783	0.250979	0.078545	0.328675
1337	AVPR1B	-0.0560571	-0.165507	-0.210043	0.0239231	-0.0396553	-0.368581	-0.185776	-0.341549	-0.395614	-0.274722	-0.0968296	-0.225612	0.00953201	0.0479087	-0.0124269	0.0602731	0.0333002	-0.112611	-0.178762	-0.152252	-0.187462	-0.232625	NA	0.520173	0.237081	0.248721	0.418084	0.289455	0.426548	0.359509
1338	AVPR2	0.120949	-0.0886499	0.263321	0.0218041	0.21131	0.276923	0.253421	0.225359	0.328487	0.171369	0.335474	0.178213	0.188212	-0.00357863	0.0653947	-0.0217866	0.207327	0.215294	-0.131615	-0.0456851	0.115591	0.411051	NA	1.45042	0.475052	0.79588	0.289709	0.623879	0.189475	0.595329
1339	AWAT1	0.00067233	0.0648461	0.0819306	0.0467016	0.115844	-0.364644	-0.297565	-0.208565	-0.520723	-0.0762272	-0.518903	-0.214704	0.293882	-0.0771609	-0.000839701	0.0942429	0.162535	0.0691519	0.0423398	0.0873524	0.26435	-0.100489	NA	0.264297	0.50812	0.341989	0.279899	0.563631	0.322676	0.614331
1340	AWAT2	0.136585	0.195557	-0.062129	0.239469	0.244608	0.24599	0.0707373	0.163577	0.328403	0.0736442	0.0678304	0.30299	-0.112326	0.219092	0.182089	0.29685	0.452952	0.0362636	0.259944	0.131169	-0.00044906	-0.123809	NA	0.654803	0.580135	0.931814	0.952608	0.63585	0.744504	0.219384
1341	AXDND1	0.0468164	-0.000448106	0.16876	0.0168809	0.0519448	-0.123349	0.112427	-0.161004	-0.0856937	0.284852	-0.0599989	-0.109874	0.0684204	0.181903	0.0723019	-0.0385401	0.0591696	0.04472	0.0697161	-0.0706123	0.174758	0.162762	NA	0.358447	0.30329	0.441291	0.286745	0.696027	0.303854	0.51967
1342	AXIN1	0.0811355	-0.0586824	0.118306	0.0137266	0.344572	0.376518	0.459471	0.249118	0.503919	0.767629	0.151314	-0.0673933	0.192413	0.118387	0.0557999	-0.0283467	0.24918	0.439963	0.129728	-0.247093	0.0151114	0.221501	NA	1.10257	0.738235	0.298432	0.59187	1.212	0.728891	0.375352
1343	AXIN2	0.0306027	0.071986	0.154832	0.0508909	0.076761	0.219345	0.146642	0.0870491	0.351642	0.213456	0.0798274	0.0799923	-0.0583504	0.0701661	0.126289	-0.0245077	0.170633	-0.0171105	0.281445	-0.137473	0.0781835	0.23148	NA	0.628905	0.48817	0.5867	0.381994	0.266987	0.532548	0.282471
1344	AXL	-0.0643579	-0.0309377	-0.104341	-0.102426	-0.167977	0.0798147	-0.219991	-0.025352	0.184981	-0.138334	-0.301648	-0.138372	-0.0159662	-0.0387359	-0.0856852	-0.119166	-0.361616	0.0256619	-0.0467218	-0.0151535	-0.172168	-0.0365134	NA	0.252285	0.285486	0.665546	0.136089	0.756726	0.348136	0.350247
1345	AZGP1	0.000963713	0.050848	-0.0333063	-0.0683446	0.0791894	0.114375	0.153232	0.135427	0.0933243	-0.0737921	0.380257	-0.0987318	-0.0349593	0.136582	-0.0808151	-0.0558741	-0.127774	0.286152	0.204226	-0.10253	0.00343061	-0.0700433	NA	0.70305	0.345405	0.238072	0.27357	0.434005	0.466262	0.123222
1346	AZI2	0.102002	0.119876	0.0940534	0.0394068	0.161876	0.197406	0.320901	0.26407	0.130742	0.334427	0.307376	0.120109	0.133617	0.0522796	0.132815	-0.0540015	0.216708	0.107043	0.0428364	0.196916	0.108192	0.0799146	NA	0.700416	0.748228	0.443697	0.563635	0.463145	0.736008	0.284335
1347	AZIN1	-0.833178	-0.939322	-1.5368	-0.555031	-0.904802	-1.14463	-0.334315	-0.938144	-1.35112	-0.668	-0.000630402	-0.824819	-0.872277	-0.802437	-0.63639	-0.473672	-0.907207	-0.902397	-0.86109	-1.01755	-0.586133	-2.48746	NA	3.05843	0.337994	2.32148	1.51216	2.07226	1.75016	1.08809
1348	AZIN2	-0.118124	-0.0585606	-0.147084	-0.0611166	-0.20909	0.0149943	-0.212612	-0.158538	0.188526	-0.185667	-0.239557	-0.10376	-0.0782029	-0.172409	-0.0266356	-0.0955977	-0.189849	-0.22833	0.0231331	-0.140254	-0.0955271	-0.19864	NA	0.231118	0.239431	0.271646	0.222609	0.161986	0.409582	0.10484
1349	AZU1	0.0197827	0.110168	0.0600041	0.071473	0.0146826	0.478421	-0.0676066	0.34835	0.608493	-0.0316828	-0.10353	0.0814325	-0.135711	0.113627	0.106736	0.0362099	-0.0580783	0.0874436	0.0587278	0.161608	-0.0419898	0.161998	NA	1.47788	0.694428	0.517126	0.466063	0.189821	0.391116	0.399125
1350	B2M	-0.064682	0.0274	0.142837	-0.0560756	0.314808	-0.283358	0.240187	-0.331286	-0.23543	0.212662	0.267712	0.102954	-0.208647	-0.0883527	0.0791434	-0.191295	0.206023	0.423592	0.137024	-0.0822236	0.0791599	0.206514	NA	0.389441	0.395698	0.408935	0.383977	0.764007	0.632271	0.748666
1351	B3GALNT1	-0.0345775	0.307306	0.22416	0.237426	0.267315	0.520326	0.365957	0.544508	0.496144	0.418119	0.313795	-0.156286	0.0472559	0.00529812	0.326095	0.148757	0.16518	0.36945	0.524593	0.0900195	0.300045	0.148274	NA	1.64332	0.79082	0.303644	1.24159	0.931035	0.590164	0.873408
1352	B3GALNT2	0.082771	-0.06057	-0.326386	0.130865	0.109575	-0.120044	-0.125295	-0.086234	-0.153854	-0.250316	-0.000273869	0.210543	-0.109226	0.146996	0.181284	0.0804455	0.0566774	0.162472	-0.0792775	-0.0418626	-0.498264	-0.154509	NA	0.442487	0.339296	0.427128	0.979287	0.36581	0.463322	0.516059
1353	B3GALT1	-0.0727386	0.0313676	-0.174163	0.126135	0.175843	0.291454	-0.227611	0.457236	0.125671	-0.121529	-0.333693	-0.2435	0.17698	-0.151696	0.0394528	0.212818	0.376449	-0.0247621	-0.0522887	0.115024	-0.274329	-0.0739963	NA	0.508888	0.320804	0.314258	0.668401	0.640499	0.221762	0.368734
1354	B3GALT2	0.135849	0.310173	0.126995	-0.0205615	0.0404782	0.304052	-0.221382	0.308022	0.300081	-0.318031	-0.124733	0.167399	0.238652	0.00149725	-0.0550902	0.0139673	0.0874897	-0.0065333	0.28071	0.339635	-0.0105524	0.264543	NA	0.808675	0.209975	0.634512	0.266779	0.276565	1.24812	0.95642
1355	B3GALT4	0.0561206	-0.0712077	-0.173805	-0.0872242	-0.181895	0.0806511	-0.240514	0.131689	0.0296137	-0.396494	-0.084535	0.156265	0.0563804	-0.0442838	-0.0132266	-0.161222	-0.182029	-0.181762	-0.0162449	-0.12617	-0.100085	-0.247525	NA	0.37286	0.270062	0.316953	0.380734	0.395002	0.36056	0.223967
[truncated: 18,008 more rows]
