# Supplementary material for: Integrative oncogene-dependency mapping identifies RIT1 vulnerabilities and synergies in lung cancer
Source: Nat Commun. 2021 Aug 9;12:4789. doi: 10.1038/s41467-021-24841-y (PMC8352964; doi:10.1038/s41467-021-24841-y)
Supplement: Supplementary file 7 — Supplementary Data 5 [file 41467_2021_24841_MOESM7_ESM.xlsx]

## Sheet: Averaged validation screen data
Secondary screen validation in PC9-Cas9 RIT1M90I cells
id	ETP_Average_LFC	ETP_Average_pValue	ETP_Average_-log10pvalue	ETP_Average_FDR	DMSO-treated_Average_LFC	DMSO_Average_pvalue	DMSO_average_-log10pvalue	DMSO_Average_FDR	ERLO_Average_LFC	ERLO_Average_pvalue	ERLO_Average_-log10pvalue	ERLO_Average_FDR
AAAS	0.14862	0.145564	0.836945	0.767392	0.456533	0.207713	0.682536	0.577341	0.57717	0.51544	0.287822	0.933687
AAMP	-0.086713	0.37702	0.423636	0.982477	-1.43903	0.066263	1.17873	0.213529	-1.14859	0.260163	0.584755	0.646756
AARD	0.0310223	0.396787	0.401443	0.965555	0.78691	0.0566973	1.24644	0.209599	0.816227	0.0978867	1.00928	0.667741
ABCA4	0.00295633	0.418933	0.377855	0.910959	0.32796	0.654613	0.184015	0.99505	0.444154	0.839493	0.0759827	0.999997
ACTR1A	0.0317243	0.489543	0.310209	0.925028	-1.1786	0.0203645	1.69113	0.088058	-1.06825	0.0889437	1.05088	0.288708
ADD1	0.0519457	0.218795	0.659962	0.764313	0.719017	0.0215473	1.66661	0.108535	1.04623	0.0484068	1.31509	0.420759
ADGRE5	0.145417	0.200007	0.698956	0.830602	0.432467	0.269053	0.570162	0.703779	0.365251	0.33625	0.473338	0.999997
ADO	0.0393598	0.24988	0.602269	0.889302	0.620913	0.143405	0.843435	0.413499	0.781697	0.37456	0.426479	0.78329
ADSL	0.0547268	0.167013	0.77725	0.778869	-2.6548	0.000380807	3.4193	0.007146	-2.6705	0.00225806	2.64627	0.0235263
AES	0.052248	0.669673	0.174137	0.999978	0.677053	0.196838	0.70589	0.550736	0.294473	0.73444	0.134044	0.999997
AGAP4	-0.286943	0.0863619	1.06368	0.528112	-0.422134	0.47964	0.319085	0.918795	-0.410532	0.56776	0.245835	0.999997
AHCTF1	-0.325443	0.00742181	2.12949	0.0771297	-0.905477	0.184777	0.733353	0.503129	-1.12403	0.064571	1.18996	0.230356
AIFM3	0.032936	0.713703	0.146482	0.999978	0.781873	0.0125913	1.89993	0.0738703	0.98035	0.21752	0.6625	0.714959
AKAP12	0.224143	0.0417968	1.37886	0.56734	0.910313	0.00268197	2.57155	0.0276253	0.776807	0.197237	0.705012	0.865246
AKAP9	0.0621993	0.48084	0.317999	0.950459	0.762723	0.0227144	1.6437	0.0906483	1.03515	0.325235	0.487802	0.669447
AKT1	0.0544203	0.122892	0.910475	0.71993	0.982323	0.000678946	3.16816	0.0137503	0.83982	0.060043	1.22154	0.553023
AKT2	0.0795507	0.742517	0.129294	0.999978	0.226263	0.7337	0.134481	0.999997	0.619637	0.43546	0.361052	0.959753
AKT3	0.1991	0.0444937	1.3517	0.593594	0.733997	0.0248784	1.60418	0.10928	0.898007	0.314276	0.502688	0.73518
ALAD	0.149588	0.262555	0.58078	0.825756	-0.272573	0.821473	0.0854065	0.999997	0.252908	0.897563	0.0469349	0.999997
ALDH18A1	0.179042	0.192337	0.715938	0.625472	0.57994	0.08512	1.06997	0.283551	0.786087	0.449647	0.347129	0.999997
ALG11	-0.009904	0.557797	0.253524	0.999978	-1.30647	0.104637	0.980313	0.317041	-1.61783	0.0912773	1.03964	0.2966
ALG13	0.0724503	0.548343	0.260947	0.999978	0.874673	0.0438148	1.35838	0.164765	0.885893	0.260397	0.584365	0.930099
ALG2	0.0865137	0.66279	0.178624	0.999978	-2.37903	0.0102306	1.9901	0.0451983	-1.95733	0.015413	1.81211	0.0827903
ALG6	0.11142	0.51136	0.291273	0.999978	-0.092286	0.898893	0.0462918	0.999997	-0.298117	0.722523	0.141148	0.999997
ALMS1	0.0421113	0.35951	0.444289	0.904593	0.68941	0.0575881	1.23967	0.202489	1.04002	0.0888083	1.05155	0.647783
ANAPC1	-0.0331857	0.00644347	2.19088	0.396465	-1.77317	0.064122	1.19299	0.207986	-1.67193	0.0717243	1.14433	0.245054
ANAPC10	0.0467217	0.4566	0.340464	0.991897	-1.83317	0.0243937	1.61272	0.100634	-1.42733	0.112085	0.950453	0.347959
ANAPC11	0.151517	0.314544	0.502319	0.746966	-2.48453	0.00998607	2.00061	0.0456713	-2.9157	0.00120296	2.91975	0.0164967
ANAPC2	-0.133158	0.45502	0.34197	0.948752	-1.12647	0.146026	0.83557	0.410424	-1.05949	0.159243	0.79794	0.444702
ANAPC4	-0.00403467	0.51248	0.290323	0.973364	-0.782687	0.136893	0.863618	0.383464	-0.634	0.440977	0.355584	0.895716
ANAPC5	0.0465917	0.358523	0.445483	0.896482	-1.10086	0.178667	0.747956	0.482346	-0.97372	0.269737	0.56906	0.649382
ANAPC7	0.069975	0.0276127	1.55889	0.52865	0.98571	0.00490393	2.30946	0.0366133	0.992727	0.127045	0.896041	0.630395
ANGPTL2	0.104082	0.324003	0.489451	0.920796	0.78923	0.039214	1.40656	0.158968	1.34477	0.00519742	2.28421	0.121861
ANKH	0.116897	0.415833	0.381081	0.91107	1.09493	0.000201467	3.6958	0.00952	0.901333	0.078188	1.10686	0.586991
ANP32A	0.083186	0.35643	0.448026	0.899242	0.816687	0.0190464	1.72019	0.094283	1.03107	0.0580086	1.23651	0.45368
ANXA1	0.147141	0.190878	0.719245	0.799094	0.76231	0.0498533	1.30231	0.189051	0.892693	0.21609	0.665365	0.915855
APP	0.075848	0.272283	0.564979	0.896353	0.67875	0.151748	0.818878	0.377804	1.10553	0.048197	1.31698	0.504079
AQR	-0.51745	0.000213111	3.67139	0.00516333	-1.8591	0.00199487	2.70009	0.017906	-1.71163	0.0143742	1.84242	0.0769787
ARAF	-0.0357543	0.744053	0.128396	0.999978	0.52035	0.215303	0.666949	0.586597	0.683233	0.481743	0.317184	0.999997
AREG	0.137112	0.173516	0.76066	0.678435	0.71931	0.0996167	1.00167	0.315456	0.875927	0.527026	0.278168	0.689052
ARF4	0.068071	0.579787	0.236732	0.999978	-1.83673	0.0011238	2.94931	0.0132037	-1.69087	0.00463373	2.33407	0.0353997
ARF6	0.119319	0.448027	0.348696	0.92989	-1.11697	0.0821243	1.08553	0.249103	-1.91823	0.0469224	1.32862	0.163204
ARGLU1	-0.0800454	0.679093	0.168071	0.999978	-1.00001	0.28719	0.541831	0.719559	-0.937753	0.127274	0.895259	0.368022
ARHGEF11	0.0349853	0.5787	0.237547	0.999978	0.675167	0.0609933	1.21472	0.222774	0.609173	0.737297	0.132358	0.999997
ARHGEF16	0.0372797	0.488904	0.310776	0.902863	0.61669	0.14885	0.827251	0.43523	0.574423	0.316733	0.499306	0.920707
ARHGEF18	0.0629157	0.285147	0.544932	0.91031	0.62038	0.265225	0.576386	0.477305	0.229193	0.8535	0.0687965	0.999997
ARL2	0.170817	0.0304123	1.51695	0.547832	-1.08154	0.117318	0.930635	0.315021	-1.48736	0.130313	0.885013	0.37399
ARL8A	0.0213897	0.155212	0.809076	0.792568	0.660313	0.0345487	1.46157	0.149238	0.75078	0.512846	0.290013	0.783692
ARMC7	-0.0172003	0.324833	0.488339	0.968916	-1.656	0.101518	0.993457	0.308928	-1.42343	0.111335	0.95337	0.346033
ARNT	-0.00139133	0.451063	0.345762	0.917701	0.340567	0.431925	0.364592	0.645776	0.883913	0.21362	0.670358	0.914289
ASAH2B	0.0121036	0.466643	0.331015	0.965008	0.28656	0.581213	0.235664	0.986827	0.339203	0.792577	0.100959	0.999997
ATAD3C	0.0442953	0.25385	0.595423	0.881943	-0.984427	0.2598	0.585361	0.665912	-1.78227	0.104172	0.982249	0.329157
ATF3	0.110613	0.467283	0.33042	0.993212	0.844303	0.0059962	2.22212	0.0453057	0.6025	0.212612	0.672412	0.815674
ATP13A1	-0.0766465	0.664893	0.177248	0.999978	0.0186803	0.88798	0.0515968	0.999997	0.031107	0.827243	0.0823667	0.999997
ATP1A1	-0.15945	0.322793	0.491075	0.985261	-1.92713	0.00840683	2.07537	0.043252	-1.5699	0.0442889	1.3537	0.166149
ATP2A2	-0.406687	0.0117676	1.92931	0.111934	-2.871	0.00124492	2.90486	0.013633	-2.89203	0.00158263	2.80062	0.0184007
ATP5C1	0.147434	0.114146	0.942538	0.683342	-0.856657	0.264557	0.577481	0.666642	-0.55329	0.483657	0.315463	0.922423
ATP5G1	0.0386983	0.28667	0.542618	0.932742	0.12258	0.415713	0.381206	0.88181	0.33545	0.751867	0.123859	0.999997
ATP6V0C	-0.172083	0.20738	0.683233	0.991678	-2.42783	0.000250378	3.6014	0.00578433	-3.03843	0.000823339	3.08442	0.0131823
ATP6V1B2	-0.204127	0.134097	0.87258	0.694231	-2.36117	0.0198007	1.70332	0.0826923	-1.66863	0.0599707	1.22206	0.214521
ATP6V1D	-0.21054	0.145733	0.836443	0.776164	-1.9933	0.00660403	2.18019	0.0386447	-1.66463	0.0765137	1.11626	0.246834
ATP6V1E1	-0.0502383	0.38487	0.414686	0.999978	-1.8007	0.00157333	2.80318	0.0155527	-1.67427	0.0879459	1.05578	0.260214
ATP6V1G1	-0.0471873	0.543233	0.265014	0.999978	-1.62714	0.144627	0.839751	0.39212	-2.05783	0.0261917	1.58184	0.114377
ATR	0.0110607	0.0618773	1.20847	0.396067	-1.23986	0.0460855	1.33644	0.156893	-0.905407	0.0957007	1.01909	0.292363
AURKA	-0.581137	0.000422725	3.37394	0.00813633	-1.2468	0.0410817	1.38635	0.150951	-2.07227	0.0204202	1.68994	0.0944017
AURKB	-0.318543	0.0141342	1.84973	0.140785	-2.0236	0.002102	2.67737	0.0181773	-1.8805	0.00437521	2.359	0.0349217
AVP	0.0186427	0.413508	0.383516	0.881097	0.714387	0.106138	0.974129	0.326744	0.999523	0.0430201	1.36633	0.405816
AVPR1A	-0.0677783	0.237533	0.624275	0.89659	0.627083	0.051474	1.28841	0.197356	0.731547	0.18882	0.723953	0.683576
B3GNT2	0.0331239	0.32841	0.483584	0.923679	0.501803	0.245757	0.609495	0.651601	0.326213	0.433045	0.363467	0.886957
B9D2	-0.032448	0.54911	0.260341	0.999978	0.272377	0.691463	0.160231	0.999997	0.19691	0.58365	0.233848	0.999997
BAD	-0.0266053	0.537367	0.269729	0.999978	0.667933	0.0189415	1.72258	0.096681	0.556242	0.52334	0.281216	0.996406
BAX	-0.0752563	0.420037	0.376713	0.999978	0.255283	0.740313	0.130584	0.999997	0.372973	0.481793	0.317139	0.999997
BBS12	0.085187	0.461087	0.336217	0.94567	0.621397	0.0665333	1.17696	0.22938	0.753897	0.311329	0.506781	0.807234
BCAP31	0.0903917	0.32417	0.489227	0.762709	0.502133	0.121236	0.916367	0.367396	0.760017	0.33046	0.480882	0.779752
BCL10	0.154683	0.132356	0.878257	0.695276	0.641073	0.0902243	1.04468	0.297331	0.831013	0.494057	0.306223	0.954987
BCL2L1	-0.17245	0.310152	0.508426	0.815434	0.239057	0.5816	0.235376	0.974443	-0.305596	0.721867	0.141543	0.999997
BCL2L10	-0.028392	0.284803	0.545455	0.964247	0.550337	0.15398	0.812535	0.449287	0.651083	0.419297	0.377479	0.999997
BCL2L11	0.0506377	0.503967	0.297598	0.948752	0.67343	0.130528	0.884297	0.362827	0.84477	0.350623	0.455159	0.999997
BCL2L2	-0.0125177	0.625433	0.203819	0.974192	0.587907	0.142899	0.844971	0.370397	0.42625	0.681443	0.16657	0.999997
BCR	0.0259833	0.491183	0.308756	0.965186	0.801147	0.0169897	1.76981	0.091622	1.28583	0.00635013	2.19722	0.143681
BCS1L	0.0613503	0.379953	0.42027	0.949397	-2.334	0.00192268	2.71609	0.0167087	-2.0446	0.0135449	1.86823	0.071028
BECN2	0.212127	0.0715677	1.14528	0.667902	0.862857	0.0116744	1.93276	0.0717287	0.654707	0.16654	0.778481	0.845662
BGN	0.049226	0.350403	0.455432	0.919304	0.937997	0.00091884	3.03676	0.0180147	1.13301	0.0842809	1.07427	0.502747
BID	0.17702	0.122495	0.911882	0.684113	0.863203	0.00623143	2.20541	0.0465623	1.36017	0.0173947	1.75958	0.190964
BIK	-0.030826	0.44079	0.355768	0.976657	0.727	0.0555858	1.25504	0.181606	0.8454	0.309977	0.508671	0.851867
BIRC3	0.161173	0.27197	0.565479	0.877636	0.965097	0.00360427	2.44318	0.0329203	1.01341	0.306864	0.513055	0.747532
BIRC5	-0.174517	0.172093	0.764237	0.844385	-1.99017	0.00171536	2.76565	0.0167283	-1.72317	0.0115023	1.93921	0.066448
BLOC1S1	0.151665	0.364145	0.438725	0.796367	0.545793	0.147316	0.831749	0.425009	0.675983	0.384075	0.415584	0.829688
BMF	0.000846033	0.414543	0.38243	0.931739	0.545403	0.401847	0.39594	0.761021	0.807283	0.424379	0.372246	0.798101
BMP2	-0.101402	0.55644	0.254582	0.999978	0.79193	0.0296037	1.52865	0.132748	0.838827	0.178629	0.748048	0.594941
BNIP3L	0.148172	0.065926	1.18094	0.609059	0.868717	0.00862364	2.06431	0.054806	0.787507	0.348235	0.458128	0.825945
BRAF	0.16972	0.0257027	1.59002	0.518696	1.07447	0.000150226	3.82325	0.008279	0.189273	0.82077	0.0857785	0.999997
BRCA1	0.0822873	0.378113	0.422378	0.964247	-0.302603	0.739663	0.130966	0.99042	-0.373883	0.551143	0.258735	0.999997
BRMS1	0.0725047	0.282237	0.549387	0.907615	0.41226	0.45591	0.341121	0.959182	0.249147	0.500203	0.300853	0.987252
BTG2	0.103	0.362154	0.441106	0.904892	0.67191	0.108778	0.963459	0.337982	0.908787	0.158049	0.801209	0.792703
BTG3	0.17014	0.166631	0.778243	0.749957	0.740807	0.025817	1.58809	0.123492	0.932143	0.240015	0.619762	0.841275
BTRC	0.07609	0.29567	0.529193	0.911494	0.83825	0.0088936	2.05092	0.058023	1.04236	0.165011	0.782487	0.666868
BUB1	-0.0391607	0.318893	0.496355	0.921523	-0.701807	0.227329	0.643345	0.561837	-0.295657	0.338323	0.470668	0.885425
BUB1B	-0.297057	0.0482747	1.31628	0.349868	-1.96747	0.00662981	2.1785	0.0362893	-2.13983	0.0153547	1.81376	0.0788207
BUB3	-0.422777	0.0101491	1.99357	0.103719	-3.26423	3.6101e-05	4.44248	0.00283	-3.38083	0.00569363	2.24461	0.035669
BUD31	-0.42277	0.00473621	2.32457	0.0579853	-1.92003	0.00307327	2.5124	0.0223353	-2.23063	0.00349947	2.456	0.0302183
BYSL	-0.118979	0.312513	0.505131	0.927186	-1.1091	0.0584057	1.23355	0.198324	-0.897963	0.235647	0.627739	0.615588
C14orf80	0.153023	0.114149	0.942527	0.737164	-0.489067	0.591323	0.228175	0.999997	-0.72706	0.183693	0.735907	0.610171
C15orf65	0.224587	0.031612	1.50015	0.552765	0.779587	0.0179002	1.74714	0.085604	0.795677	0.364053	0.438835	0.999997
C16orf82	0.0189648	0.227963	0.642135	0.861351	0.783327	0.035217	1.45325	0.148006	0.664527	0.327447	0.484859	0.7559
C17orf49	0.122765	0.268779	0.570605	0.814748	0.678633	0.0975057	1.01097	0.314214	0.755447	0.551413	0.258523	0.999997
C17orf53	0.0175407	0.23076	0.63684	0.690693	0.499827	0.138691	0.857951	0.414611	0.333977	0.26863	0.570845	0.901838
C19orf53	0.0593213	0.425567	0.371032	0.897666	-0.185919	0.52314	0.281382	0.950622	-0.327457	0.512093	0.290651	0.975394
C19orf73	-0.0905617	0.441363	0.355204	0.975893	0.32881	0.491417	0.30855	0.985412	0.200026	0.80465	0.094393	0.999997
C1orf109	-0.023714	0.333253	0.477226	0.848095	-1.82083	0.0205856	1.68644	0.0767253	-2.75967	0.0087283	2.05907	0.0477107
C1orf131	0.0356643	0.156617	0.805162	0.854761	-0.813537	0.21301	0.6716	0.559799	-0.647463	0.181333	0.741522	0.506583
C2orf81	0.000193667	0.42751	0.369054	0.952937	0.452283	0.374756	0.426252	0.736917	0.687483	0.496832	0.303791	0.819948
C4orf46	0.207571	0.0339059	1.46972	0.462151	0.701193	0.113153	0.946335	0.364894	0.72693	0.105573	0.976449	0.658511
C8orf22	0.127163	0.217761	0.662021	0.816457	0.700827	0.0394352	1.40412	0.153135	1.0242	0.283379	0.547633	0.739385
CA8	0.167542	0.174547	0.758087	0.639815	0.93563	0.0081042	2.09129	0.050697	0.918697	0.304764	0.516036	0.831872
CAB39	0.353747	0.0154896	1.80996	0.219989	1.09927	6.63793e-05	4.17797	0.00616467	3.14443	3.4936e-06	5.45673	0.000554667
CABP1	0.133555	0.254117	0.594967	0.72525	0.91886	0.000984053	3.00698	0.0173697	0.997557	0.202843	0.692839	0.881289
CAD	-0.0305393	0.68667	0.163252	0.999978	-1.23586	0.0608523	1.21572	0.199637	-1.17167	0.203502	0.691432	0.421713
CARNMT1	0.184937	0.119415	0.92294	0.662951	-0.183037	0.772483	0.112111	0.999997	-0.961147	0.217592	0.662356	0.559246
CASC3	0.0304443	0.42645	0.370132	0.924713	-0.19419	0.88856	0.0513132	0.999997	0.147479	0.656443	0.182803	0.999997
CASP1	0.159422	0.116291	0.934453	0.690427	0.92263	0.00148014	2.8297	0.0208057	1.2571	0.0336589	1.4729	0.296108
CASP2	0.067801	0.660437	0.180169	0.999978	0.793643	0.00709563	2.14901	0.0494407	0.837263	0.4942	0.306097	0.932914
CASP3	0.112062	0.25514	0.593222	0.86324	0.94446	0.00929436	2.03178	0.055627	1.2538	0.0627138	1.20264	0.376403
CASP4	0.23346	0.0185175	1.73242	0.476961	1.0569	0.00115407	2.93777	0.015174	1.11407	0.078845	1.10323	0.617418
CASP6	0.169817	0.196241	0.70721	0.804279	0.84051	0.00979038	2.0092	0.0583747	0.92074	0.210293	0.677174	0.906769
CASP7	-0.023394	0.46358	0.333875	0.931089	0.608893	0.02513	1.59981	0.118931	0.603627	0.31538	0.501165	0.815864
CASP8	0.0769637	0.403687	0.393956	0.942013	0.65717	0.144671	0.839619	0.397333	0.605107	0.33079	0.480448	0.999997
CASP9	0.0948467	0.366295	0.436169	0.89341	0.62928	0.102581	0.988933	0.29384	0.844173	0.167843	0.775096	0.779281
CAV1	0.110674	0.345404	0.461673	0.844982	0.87078	0.000471643	3.32639	0.0130193	1.06623	0.080735	1.09294	0.588879
CBX6	-0.018869	0.522833	0.281637	0.999978	0.212223	0.649043	0.187726	0.98619	0.700093	0.359339	0.444496	0.848742
CCDC12	0.0511467	0.668993	0.174578	0.999978	-0.661913	0.38871	0.410374	0.789935	-0.621843	0.408563	0.388741	0.864421
CCDC144NL	-0.00363667	0.408167	0.389162	0.992229	0.197748	0.737887	0.13201	0.999997	0.104203	0.582117	0.23499	0.997688
CCDC174	-0.029411	0.30588	0.514449	0.895389	-0.80475	0.240903	0.618157	0.619231	-0.338194	0.362733	0.440413	0.985439
CCDC59	0.15717	0.102199	0.990555	0.711091	-0.0167667	0.761313	0.118437	0.999997	0.277813	0.364053	0.438835	0.947901
CCDC6	0.0490963	0.476747	0.321712	0.971675	0.33485	0.51173	0.290959	0.938644	0.46796	0.53094	0.274955	0.999997
CCNA1	0.167958	0.335068	0.474868	0.726866	0.86278	0.0190717	1.71961	0.102403	0.948443	0.328721	0.483173	0.816896
CCNA2	-0.142183	0.41597	0.380938	0.999978	-0.702653	0.304823	0.515952	0.754501	-1.15153	0.0585494	1.23248	0.194725
CCNB1	-0.209323	0.0312556	1.50507	0.254866	-1.32987	0.0238021	1.62339	0.0970043	-1.1877	0.146371	0.834544	0.415415
CCNB2	0.0906427	0.456025	0.341012	0.908284	0.4916	0.14251	0.846156	0.428193	0.60907	0.30758	0.512042	0.977359
CCND1	-0.296577	0.061482	1.21125	0.442062	-0.7285	0.213727	0.670141	0.534841	-1.45343	0.0444056	1.35256	0.164
CCND2	0.124095	0.39454	0.403909	0.834776	0.73495	0.0157623	1.80238	0.0736767	0.9368	0.186969	0.728231	0.737196
CCND3	-0.0971648	0.568217	0.245486	0.999978	0.24465	0.573397	0.241545	0.837349	0.0728063	0.698813	0.155639	0.999997
CCNE1	-0.158782	0.169217	0.771557	0.743551	0.014147	0.55735	0.253872	0.974468	0.388527	0.64779	0.188566	0.999997
CCNE2	0.0753113	0.54225	0.2658	0.967838	0.85048	0.0311343	1.50676	0.139967	0.87197	0.266874	0.573693	0.738859
CCNH	0.0355393	0.273563	0.562942	0.913499	-1.4815	0.0166006	1.77988	0.076146	-1.60586	0.0569558	1.24446	0.173094
CCNL1	0.1231	0.159407	0.797494	0.791368	0.649033	0.086162	1.06468	0.283201	0.58007	0.707333	0.150376	0.999997
CCT2	-0.0439727	0.421123	0.375591	0.999978	-2.2673	0.00266565	2.5742	0.020152	-1.45873	0.0129696	1.88707	0.067208
CCT5	0.072579	0.6133	0.212327	0.999978	-2.26327	0.0135497	1.86807	0.06738	-1.84557	0.0444633	1.352	0.17368
CCT6A	0.071427	0.432763	0.36375	0.940663	-1.35679	0.0542513	1.26559	0.182795	-1.35417	0.114692	0.940467	0.328424
CD14	0.0602837	0.402237	0.395518	0.959052	0.643277	0.199958	0.699061	0.496983	0.696133	0.176863	0.752364	0.641862
CD2	0.000926333	0.522027	0.282307	0.999978	0.32984	0.558913	0.252656	0.79193	0.421723	0.56659	0.246731	0.999997
CD38	0.0784487	0.35424	0.450702	0.914139	0.939133	0.00081169	3.09061	0.012707	1.15277	0.108116	0.966108	0.476475
CD44	0.185173	0.258153	0.588123	0.714042	0.915237	0.0115789	1.93633	0.0696187	1.15847	0.0507701	1.29439	0.424209
CD69	0.190193	0.13529	0.868733	0.702233	0.921767	0.00242343	2.61557	0.0265827	1.10187	0.0570571	1.24369	0.505033
CDC14A	0.15918	0.0858013	1.06651	0.704235	0.5696	0.176228	0.753926	0.477156	0.560203	0.534753	0.271846	0.999997
CDC16	0.159207	0.269856	0.568868	0.879785	-1.10741	0.0029824	2.52543	0.0218707	-1.00325	0.20669	0.684681	0.552894
CDC20	-0.760137	3.14429e-05	4.50248	0.001132	-2.01353	0.0168104	1.77442	0.077356	-1.76593	0.0295737	1.52909	0.129636
CDC23	-0.0425027	0.192623	0.715293	0.824958	-2.4028	0.00904973	2.04336	0.048944	-2.6225	0.00269127	2.57004	0.0227467
CDC25A	0.113722	0.18143	0.741291	0.827765	0.54068	0.249461	0.602998	0.598775	0.68756	0.155594	0.808006	0.730577
CDC25B	-0.166363	0.370146	0.431627	0.797165	0.782387	0.039356	1.40499	0.165021	0.0847633	0.85333	0.068883	0.999997
CDC25C	0.0945	0.453027	0.343876	0.951395	0.688827	0.0462741	1.33466	0.161575	0.926927	0.123189	0.909427	0.534989
CDC26	0.0524547	0.75245	0.123522	0.999978	-0.381437	0.567183	0.246277	0.835928	-0.422597	0.55054	0.259211	0.999997
CDC26P1	0.0602303	0.36252	0.440668	0.964807	0.487487	0.211698	0.674284	0.565672	0.547957	0.35504	0.449723	0.908345
CDC27	-0.182972	0.0788257	1.10333	0.544453	-0.94093	0.227867	0.642319	0.599884	-1.16883	0.204103	0.690151	0.390222
CDC37	-0.082999	0.456267	0.340781	0.968695	-1.39753	0.0229497	1.63922	0.090566	-1.67413	0.0213614	1.67037	0.089114
CDC45	-0.516197	0.00720743	2.14222	0.0777353	-1.9113	0.02257	1.64647	0.0981447	-2.16247	0.0509098	1.2932	0.175951
CDC6	-0.584277	0.000199136	3.70085	0.00466833	-1.57223	0.0830183	1.08083	0.261204	-1.6612	0.0761397	1.11839	0.262379
CDC7	-0.334	0.0179398	1.74618	0.157301	-0.427137	0.190598	0.719882	0.499179	-0.575117	0.176086	0.754276	0.475139
CDCA8	-0.126425	0.379693	0.420567	0.999978	-0.701987	0.342527	0.465306	0.777795	-1.02331	0.22146	0.654705	0.588454
CDIPT	0.0671793	0.333747	0.476583	0.877823	-2.3399	0.008407	2.07536	0.043881	-2.07267	0.0056329	2.24927	0.0416047
CDK1	-0.84206	3.4936e-06	5.45673	0.000215333	-2.7909	0.000411087	3.38607	0.00819267	-2.8438	0.000753473	3.12293	0.0137423
CDK12	-0.0607013	0.287436	0.541459	0.860135	-1.22777	0.0605763	1.2177	0.20148	-1.02343	0.143462	0.843262	0.407578
CDK2	-0.0547153	0.53346	0.272898	0.999978	-0.236597	0.78159	0.107021	0.999997	0.0804267	0.77789	0.109082	0.999997
CDK4	-0.170797	0.280314	0.552355	0.841598	-0.576963	0.456003	0.341032	0.722639	-1.3469	0.0317933	1.49766	0.128526
CDK5RAP2	-0.0225747	0.387303	0.411949	0.999978	0.591197	0.233948	0.630881	0.474118	0.46255	0.390147	0.408772	0.999997
CDK6	0.0257557	0.480227	0.318554	0.999978	0.63838	0.104274	0.981825	0.302663	0.6673	0.44726	0.34944	0.975253
CDK7	0.024469	0.601363	0.220863	0.999978	-1.7525	0.000345873	3.46108	0.00673867	-2.1524	0.00131944	2.87961	0.0165993
CDK9	0.0458588	0.422583	0.374088	0.959052	-2.1495	0.00363923	2.43899	0.0249947	-2.33083	0.0077594	2.11017	0.0493197
CDKN1A	0.19809	0.068904	1.16176	0.612143	0.79731	0.075705	1.12088	0.253676	0.822053	0.168298	0.77392	0.743382
CDKN1B	0.070382	0.453263	0.343649	0.999854	0.914323	0.0381441	1.41857	0.136423	1.11746	0.0243241	1.61396	0.310508
CDKN2A	-0.024226	0.253008	0.596865	0.850895	0.96436	0.00264702	2.57724	0.0281313	1.03262	0.09971	1.00126	0.59151
CDKN2B	0.0787723	0.368214	0.4339	0.85124	0.842367	0.0095435	2.02029	0.0642943	1.02033	0.158334	0.800425	0.558107
CDKN2C	0.166594	0.394054	0.404444	0.791861	0.6025	0.0778207	1.10891	0.269184	0.76223	0.406129	0.391336	0.811939
CDKN2D	0.112873	0.170474	0.768343	0.783877	0.38956	0.46147	0.335857	0.777176	0.169701	0.824083	0.0840289	0.999997
CDT1	-0.556357	0.00374623	2.42641	0.043907	-0.41241	0.449827	0.346955	0.878581	-0.717243	0.330143	0.481297	0.808844
CEBPZ	-0.0501663	0.107582	0.968262	0.728915	-2.74957	0.00450798	2.34602	0.0290347	-1.64837	0.0764923	1.11638	0.263029
CENPA	0.0412911	0.558987	0.252599	0.999978	-0.697093	0.38743	0.411807	0.765894	-0.963177	0.15928	0.797839	0.463212
CENPH	-0.09216	0.152685	0.816203	0.732035	-0.629843	0.50748	0.294581	0.999997	-0.382402	0.56485	0.248067	0.98198
CENPI	-0.115359	0.21953	0.658506	0.943694	-0.810573	0.176118	0.754195	0.467335	-0.918593	0.30388	0.517298	0.722865
CENPJ	0.0154993	0.65618	0.182977	0.999978	-0.00462267	0.825803	0.0831234	0.999997	-0.0235309	0.896027	0.0476791	0.999997
CENPK	-0.108258	0.109723	0.959701	0.695233	-0.87249	0.136903	0.863588	0.377311	-0.67415	0.23878	0.622001	0.574517
CENPL	-0.0142147	0.690723	0.160696	0.992989	-1.09877	0.145823	0.836173	0.415168	-1.06352	0.194303	0.71152	0.3735
CENPM	-0.204417	0.356313	0.448168	0.834893	-2.53967	0.0018691	2.72837	0.0170957	-2.2833	0.0033015	2.48129	0.028371
CENPN	0.0279037	0.37611	0.424685	0.870999	-1.50967	0.047135	1.32666	0.166772	-1.35919	0.074538	1.12762	0.225607
CENPO	0.0938357	0.390268	0.408637	0.890613	0.332122	0.271171	0.566757	0.67433	0.639587	0.51728	0.286274	0.999997
CENPP	0.0448973	0.30497	0.515743	0.917997	0.259218	0.581673	0.235321	0.975666	0.547427	0.53174	0.274301	0.996373
CENPQ	0.237703	0.0517921	1.28574	0.565546	0.0866667	0.60227	0.220209	0.934823	0.49558	0.638517	0.194828	0.999997
CENPT	-0.0647363	0.59716	0.223909	0.999978	-0.0695166	0.66762	0.175471	0.999997	-0.217965	0.633527	0.198235	0.999997
CENPU	0.115835	0.300403	0.522295	0.929195	0.519443	0.216295	0.664954	0.579831	0.72007	0.64395	0.191148	0.999997
CENPW	-0.218977	0.101829	0.99213	0.634046	-1.84347	0.0223581	1.65056	0.0888513	-1.83087	0.00720257	2.14251	0.0498683
CEP135	0.191707	0.0896773	1.04732	0.65567	0.68231	0.0751813	1.12389	0.260915	0.50499	0.393663	0.404875	0.910112
CEP164	0.103013	0.32659	0.485997	0.943636	0.842467	0.0027914	2.55418	0.0294743	0.943967	0.080994	1.09155	0.604634
CEP192	-0.123019	0.455603	0.341413	0.906099	-0.481953	0.422047	0.37464	0.833161	-0.64331	0.393827	0.404695	0.918894
CEP250	0.0994983	0.0681063	1.16681	0.66214	0.67369	0.0195098	1.70975	0.097802	0.928833	0.057441	1.24078	0.500083
CEP290	0.11648	0.0749447	1.12526	0.640527	0.753107	0.0407902	1.38944	0.154127	0.818723	0.234137	0.630531	0.920294
CEP41	0.101445	0.1643	0.784362	0.811772	0.793363	0.0455996	1.34104	0.171305	0.887083	0.220226	0.657131	0.685831
CEP55	0.146972	0.195693	0.708425	0.7387	-0.011383	0.191456	0.717931	0.530001	-0.962253	0.341143	0.467063	0.7911
CEP57	0.0197793	0.43377	0.36274	0.968916	0.808147	0.0177934	1.74974	0.089801	0.842773	0.180827	0.742738	0.797028
CEP63	0.0788067	0.139617	0.85506	0.645269	0.54815	0.25107	0.600205	0.671962	0.58513	0.588123	0.230532	0.999997
CEP70	0.01713	0.445733	0.350925	0.952937	0.60954	0.0634827	1.19734	0.218378	0.87137	0.480653	0.318168	0.999997
CEP72	-0.0190687	0.576053	0.239537	0.927667	0.752373	0.0189857	1.72157	0.0931937	0.88604	0.534233	0.272269	0.999997
CEP76	0.0628633	0.575677	0.239821	0.999978	0.58914	0.126212	0.898901	0.338785	0.796387	0.268	0.571865	0.859261
CEP78	0.124246	0.297283	0.526829	0.87087	0.68193	0.0811222	1.09086	0.249429	0.777283	0.34298	0.464731	0.927726
CEP85	0.0263897	0.68488	0.164386	0.999978	-0.446827	0.367981	0.434174	0.709102	-0.82329	0.19956	0.699926	0.531152
CETN2	0.112124	0.35285	0.45241	0.821984	0.873147	0.0014848	2.82833	0.021591	0.957227	0.131371	0.881499	0.758687
CFAP206	0.00819633	0.094298	1.0255	0.606644	0.772693	0.0360859	1.44266	0.144657	0.98732	0.0855087	1.06799	0.574724
CFLAR	-0.023398	0.297276	0.526841	0.798646	-0.159602	0.747293	0.126509	0.999997	0.124952	0.758397	0.120104	0.999997
CHEK1	-0.726723	0.00013858	3.8583	0.00391233	-1.8332	0.0310363	1.50813	0.121881	-1.36553	0.156207	0.806299	0.43955
CHMP2A	-0.152347	0.463317	0.334122	0.985011	-1.68423	0.0103518	1.98498	0.049374	-1.9102	0.0167683	1.77551	0.088681
CHMP4B	-0.147169	0.315326	0.501241	0.835006	-1.82933	0.0208513	1.68087	0.0930413	-1.73763	0.0297437	1.52661	0.121056
CHMP7	0.192737	0.0805707	1.09382	0.69728	-0.157028	0.91178	0.0401099	0.999997	-0.0841533	0.7274	0.138227	0.999997
CKAP5	-0.58064	0.00100501	2.99783	0.014601	-2.13833	0.00388147	2.411	0.0262253	-2.39183	0.0025329	2.59638	0.0243713
CKS1B	0.0481988	0.619867	0.207702	0.999978	-0.148577	0.935867	0.028786	0.999997	0.170426	0.6844	0.16469	0.994599
CLASP1	-0.038073	0.433603	0.362907	0.961993	-0.70604	0.26933	0.569715	0.500854	-0.609173	0.373372	0.427858	0.682306
CLEC3B	-0.0595587	0.41544	0.381492	0.999978	-0.0942207	0.777507	0.109296	0.999997	0.0704472	0.682237	0.166065	0.999997
CLIP1	0.141083	0.334536	0.475557	0.773296	0.91138	0.00438685	2.35785	0.0370687	0.94088	0.110506	0.956613	0.735533
CLNS1A	0.10718	0.295967	0.528757	0.85798	-1.34387	0.179553	0.745807	0.496543	-1.37839	0.198835	0.701508	0.520567
CLP1	-0.0974447	0.775973	0.110153	0.999978	-1.48723	0.0396938	1.40128	0.135236	-1.99537	0.00578664	2.23757	0.0384143
CLTC	-0.42799	0.00232561	2.63346	0.032112	-1.59867	0.00152208	2.81756	0.0146717	-1.42078	0.149027	0.826736	0.384006
CLU	0.072575	0.160687	0.79402	0.798186	0.71494	0.106642	0.972072	0.329099	0.894793	0.259829	0.585312	0.739385
CMPK1	0.112072	0.313163	0.504229	0.934022	-0.82563	0.257053	0.589977	0.647397	-1.26277	0.0677637	1.169	0.239011
CNOT10	0.17488	0.14766	0.830738	0.740727	0.193279	0.6172	0.209574	0.798976	-0.154743	0.57373	0.241292	0.999997
CNOT2	0.0399473	0.341477	0.466639	0.974419	0.0770402	0.688983	0.161791	0.997932	0.341553	0.57123	0.243189	0.999997
CNOT3	-0.212967	0.157199	0.80355	0.571326	-1.36658	0.0581572	1.2354	0.183817	-1.3073	0.106394	0.973082	0.320449
CNOT4	0.119287	0.118625	0.925823	0.715685	0.078825	0.76982	0.113611	0.999997	-0.40801	0.56449	0.248344	0.996559
CNOT6	0.0277513	0.181523	0.741069	0.780559	1.02704	0.0013404	2.87277	0.016873	0.883637	0.333827	0.476479	0.892934
CNOT7	0.208776	0.0890544	1.05034	0.600877	0.952683	0.0383989	1.41568	0.139121	1.30443	0.00744715	2.12801	0.131472
CNOT8	0.174196	0.304826	0.515947	0.680295	0.974337	0.0140013	1.85383	0.0634703	1.26683	0.0265739	1.57554	0.257631
CNOT9	0.059763	0.245017	0.610804	0.87615	-0.511977	0.52784	0.277498	0.78037	-0.478837	0.497143	0.303518	0.839508
CNTRL	-0.020971	0.44921	0.347551	0.991851	0.802413	0.00550256	2.25943	0.0395057	1.10302	0.14282	0.845211	0.696002
COA6	0.0891563	0.384423	0.41519	0.92155	-1.5213	0.0171922	1.76467	0.078888	-1.4887	0.00312213	2.50555	0.0283247
COA7	0.0462297	0.568927	0.244944	0.998893	-0.869627	0.0357503	1.44672	0.136835	-0.918107	0.077689	1.10964	0.259997
COL4A4	0.15408	0.412907	0.384148	0.940331	0.66594	0.0736368	1.1329	0.228855	0.70928	0.159919	0.7961	0.818786
COPE	-0.136386	0.301767	0.520329	0.845105	-1.25133	0.14228	0.846856	0.408376	-0.338706	0.594947	0.225522	0.999997
COPS2	0.110701	0.420877	0.375845	0.965741	-1.21093	0.0790277	1.10222	0.250786	-0.90961	0.347787	0.458687	0.819651
COPZ1	-0.169727	0.0672943	1.17202	0.466521	-0.276917	0.641813	0.192591	0.999997	-0.21131	0.385703	0.413747	0.900054
COX17	-0.060002	0.67423	0.171192	0.999978	-0.869573	0.304708	0.516116	0.711066	-1.00851	0.170227	0.768971	0.469899
CPA1	0.17825	0.280696	0.551763	0.77007	0.646143	0.00950163	2.0222	0.059144	0.758767	0.342157	0.465775	0.884918
CPSF2	0.011429	0.558784	0.252756	0.886298	-1.87557	0.0139315	1.856	0.0658407	-1.47093	0.018648	1.72937	0.0975097
CREBBP	0.135113	0.371511	0.430028	0.890613	0.780347	0.00496445	2.30413	0.0394107	0.762777	0.179252	0.746536	0.716822
CRNKL1	-0.376707	0.017269	1.76273	0.147641	-1.50783	0.066598	1.17654	0.217965	-1.5196	0.0952153	1.02129	0.309236
CRYGA	0.0247913	0.450297	0.346501	0.967068	0.66204	0.027808	1.55583	0.130134	1.04037	0.137321	0.862263	0.638577
CSE1L	-0.0799183	0.218033	0.661477	0.949927	-1.8814	0.0253903	1.59533	0.105372	-1.84483	0.0204013	1.69034	0.10477
CSK	0.146559	0.205063	0.688113	0.834215	0.98045	0.0073237	2.13527	0.0456627	2.4078	3.4936e-06	5.45673	0.000554667
CSNK1A1	-0.252063	0.173753	0.760067	0.67466	-1.65237	0.0237174	1.62493	0.094384	-1.96383	0.0175021	1.75691	0.0810753
CSNK1D	-0.0420193	0.24807	0.605426	0.867838	0.280253	0.49577	0.30472	0.835792	0.277765	0.661807	0.179269	0.999997
CSNK1E	0.0383373	0.0791083	1.10178	0.669018	0.56361	0.159916	0.796109	0.468802	0.521347	0.10552	0.976667	0.686681
CT47A1	0.115433	0.113258	0.945931	0.746881	0.466173	0.16363	0.786137	0.475311	0.479833	0.32205	0.492077	0.91375
CTH	0.16518	0.0788607	1.10314	0.645524	0.796243	0.0227402	1.64321	0.103177	0.927347	0.184318	0.734432	0.799011
CTNNB1	0.119509	0.194614	0.710826	0.71674	0.809197	0.00566563	2.24675	0.0441947	1.10508	0.271171	0.566757	0.650748
CTU1	0.0808697	0.519397	0.284501	0.999978	-1.64917	0.0673903	1.1714	0.217403	-1.23921	0.0658667	1.18133	0.2316
CUL1	0.187137	0.0246476	1.60823	0.487428	-0.264677	0.823307	0.0844384	0.999997	-0.736953	0.36936	0.43255	0.741348
CUL4B	-0.0363383	0.344787	0.46245	0.944283	0.331593	0.626537	0.203054	0.952773	0.154053	0.901997	0.0447951	0.999997
CYB5A	-0.0257816	0.73024	0.136534	0.999978	-1.9736	0.00840453	2.07549	0.0465137	-1.28305	0.031798	1.4976	0.140226
CYCS	0.121733	0.289297	0.538657	0.886577	-1.36793	0.0347163	1.45947	0.133797	-1.11088	0.147206	0.832075	0.398231
CYLD	0.056922	0.570603	0.243666	0.925028	0.778843	0.037707	1.42358	0.158754	1.10767	0.135689	0.867456	0.555959
DAD1	-0.0290963	0.35512	0.449625	0.912528	-2.17517	0.0222697	1.65229	0.090941	-2.5836	0.0034366	2.46387	0.0303923
DAP	0.21714	0.172165	0.764056	0.686875	0.7617	0.00562593	2.24981	0.0447297	0.655277	0.294	0.531653	0.915168
DAP3	0.0561253	0.566293	0.246959	0.999978	-0.965947	0.221074	0.655463	0.454715	-1.2732	0.103584	0.984707	0.317284
DARS2	0.13616	0.23545	0.628101	0.856397	-0.746037	0.360817	0.442713	0.878383	-0.42384	0.54037	0.267309	0.999997
DBF4	-0.00829733	0.624053	0.204778	0.999978	0.24429	0.46255	0.334841	0.966634	-0.151802	0.720647	0.142278	0.999997
DCAF1	-0.161573	0.275903	0.559243	0.874481	-2.13563	0.00309887	2.5088	0.0236837	-1.6435	0.0527681	1.27763	0.186582
DCDC2B	0.061265	0.44795	0.34877	0.999978	0.433077	0.32283	0.491026	0.73357	0.69725	0.39605	0.40225	0.903423
DCN	0.20566	0.0809803	1.09162	0.642069	0.889113	0.0310249	1.50829	0.130329	0.92693	0.114297	0.941964	0.772512
DCP1A	0.0407387	0.750137	0.12486	0.999978	0.20251	0.606387	0.21725	0.949005	0.908583	0.361624	0.441743	0.778061
DCP1B	0.128982	0.397423	0.400747	0.938016	0.745653	0.0305103	1.51555	0.137553	0.84423	0.25422	0.59479	0.889721
DCP2	0.0182027	0.343643	0.463892	0.955363	0.680513	0.0456023	1.34101	0.182484	1.35963	0.00917776	2.03726	0.144435
DCPS	0.210267	0.0219227	1.65911	0.470984	-0.77249	0.45888	0.338301	0.897667	-0.99365	0.247687	0.606097	0.641411
DCTN1	0.0115997	0.37066	0.431024	0.934054	-0.370727	0.618167	0.208894	0.999997	-0.06541	0.572733	0.242048	0.999997
DCTN2	-0.0939217	0.476183	0.322226	0.999978	-0.72831	0.335293	0.474576	0.73501	-0.58672	0.479497	0.319214	0.867844
DCTN3	-0.000240333	0.715443	0.145425	0.999978	-0.801517	0.14167	0.848722	0.410521	-1.12521	0.137825	0.860671	0.410079
DDIT3	0.0446457	0.553803	0.256644	0.917701	0.601137	0.22564	0.646583	0.576981	0.934063	0.114812	0.940013	0.684735
DDX18	-0.00830333	0.710517	0.148426	0.999978	-2.18027	0.00248634	2.60444	0.0193587	-1.39947	0.00376266	2.42451	0.0316373
DDX20	-0.010544	0.495487	0.304968	0.986469	-0.35975	0.370943	0.430692	0.881881	-0.800703	0.174489	0.758233	0.480063
DDX21	-0.095718	0.58437	0.233312	0.867887	-3.02073	0.0004763	3.32212	0.00861233	-3.07423	0.00300804	2.52172	0.026952
DDX3X	-0.23894	0.126485	0.897962	0.417112	-2.6739	0.00624768	2.20428	0.035229	-1.75187	0.0362327	1.4409	0.138295
DDX55	0.114788	0.305247	0.515348	0.847037	-1.46273	0.0125362	1.90183	0.055121	-1.71713	0.0828832	1.08153	0.23173
DDX6	0.135644	0.177078	0.751835	0.731618	-0.827877	0.411503	0.385627	0.823582	-0.773213	0.37438	0.426687	0.88754
DFFA	0.15718	0.232355	0.633849	0.828465	0.76854	0.152455	0.816858	0.405233	1.03814	0.1356	0.867741	0.536811
DHFR	0.0207109	0.525853	0.279135	0.967838	-2.50533	0.00182717	2.73822	0.0142687	-2.8718	0.00350178	2.45571	0.0287527
DHFRP1	0.14238	0.248799	0.604152	0.843571	0.540542	0.0445566	1.35109	0.168035	0.699763	0.324569	0.488693	0.742017
DHPS	0.00793833	0.128935	0.889628	0.653175	-1.86323	0.0224979	1.64786	0.093975	-2.2356	0.00966687	2.01471	0.0599747
DHX15	-0.109832	0.294297	0.531215	0.924546	-2.2846	0.00466633	2.33102	0.029229	-2.58083	0.0072888	2.13734	0.0431547
DHX8	-0.46481	0.00494572	2.30577	0.057548	-1.30833	0.00945503	2.02434	0.0483713	-1.33893	0.0145998	1.83565	0.0738527
DHX9	-0.0725173	0.52552	0.279411	0.999978	-1.7021	0.0182752	1.73814	0.0838153	-2.0397	0.0197844	1.70368	0.0885817
DIABLO	0.218763	0.0277547	1.55666	0.550344	0.857333	0.0137941	1.86031	0.0682843	0.973647	0.229175	0.639833	0.846499
DIS3	-0.019309	0.63702	0.195847	0.999978	-1.75903	0.0207417	1.68316	0.088317	-1.68833	0.0194768	1.71048	0.091647
DKC1	0.0942903	0.506213	0.295666	0.975631	-1.72653	0.0175322	1.75616	0.0684617	-1.34703	0.034975	1.45624	0.138
DLD	0.141	0.140369	0.852728	0.759434	-1.13423	0.0506033	1.29582	0.177543	-1.438	0.0557577	1.2537	0.203994
DNA2	-0.134385	0.37877	0.421624	0.999978	-2.16633	0.00115173	2.93865	0.0133733	-2.03853	0.00808532	2.0923	0.0526417
DNAJA1	-0.00901133	0.144307	0.840714	0.801607	0.312537	0.34938	0.456702	0.683056	0.67712	0.321137	0.49331	0.999997
DNAJC3	0.124685	0.226855	0.644253	0.677045	0.578977	0.146339	0.834641	0.402398	0.614897	0.77733	0.109395	0.999997
DNAJC8	0.040698	0.370847	0.430806	0.917638	-0.662577	0.49978	0.301221	0.983765	-1.03771	0.234617	0.629641	0.613801
DNAJC9	0.000710333	0.503383	0.298101	0.919776	-0.33087	0.673873	0.171422	0.999997	-0.76842	0.180528	0.743455	0.478972
DNHD1	0.137819	0.332579	0.478106	0.821831	0.79286	0.0268579	1.57093	0.121039	0.672833	0.288703	0.539548	0.894034
DNLZ	-0.0173463	0.405363	0.392156	0.918172	-1.65947	0.042633	1.37025	0.153863	-1.26841	0.125655	0.900821	0.357935
DNM1L	0.0438047	0.623947	0.204853	0.999978	-0.895733	0.0594758	1.22566	0.175207	-0.58817	0.447905	0.348814	0.717546
DNPEP	0.075509	0.348937	0.457253	0.930505	0.647593	0.141994	0.84773	0.41412	0.665473	0.176727	0.752698	0.753784
DOCK5	-0.104647	0.502603	0.298775	0.937637	0.0451113	0.863573	0.0637008	0.999997	-0.84245	0.33421	0.475981	0.819264
DPH3	-0.0508357	0.750523	0.124636	0.999978	-2.8882	0.000569463	3.24453	0.00928433	-2.39813	0.0115466	1.93755	0.0639363
DPH5	0.113522	0.385476	0.414003	0.842545	-0.70082	0.218601	0.660347	0.555304	-1.06089	0.170947	0.767139	0.465239
DPYD	0.128493	0.470877	0.327093	0.945289	0.493313	0.303987	0.517145	0.757674	0.643483	0.44126	0.355305	0.983971
DSN1	0.0983817	0.361253	0.442188	0.947645	0.525997	0.281347	0.550758	0.72258	0.628937	0.404993	0.392552	0.918025
DTL	-0.213697	0.0870847	1.06006	0.55376	-1.60097	0.06636	1.17809	0.216553	-1.85377	0.0369103	1.43285	0.153736
DYNC1H1	-0.003633	0.618103	0.208939	0.999978	-0.633733	0.385827	0.413608	0.748543	-0.729957	0.37547	0.425425	0.879992
DYNC1I2	0.0324733	0.26556	0.575837	0.937204	-0.805193	0.187713	0.726504	0.386743	-1.17503	0.218917	0.659721	0.583109
DYNLL1	-0.0808093	0.476553	0.321888	0.999978	0.0171253	0.881667	0.0546956	0.999997	0.454517	0.628567	0.201649	0.999997
DYRK1A	0.408863	0.000138581	3.8583	0.071782	0.721057	0.0229193	1.6398	0.106921	0.90688	0.197835	0.703696	0.862834
E2F1	0.089396	0.5023	0.299037	0.965008	0.801827	0.0373622	1.42757	0.144877	0.74387	0.374883	0.426104	0.924543
E2F2	0.16559	0.0183313	1.73681	0.500123	0.709337	0.037912	1.42122	0.160972	1.00082	0.046285	1.33456	0.457339
E2F3	0.108572	0.698373	0.155912	0.999978	0.63988	0.0267299	1.573	0.11531	0.763427	0.390427	0.408461	0.909264
E2F4	0.0553039	0.418143	0.378675	0.940424	0.76654	0.0552597	1.25759	0.193229	0.324039	0.211261	0.675181	0.716223
E2F5	0.24103	0.0473929	1.32429	0.530371	0.785843	0.0755327	1.12187	0.258384	1.07428	0.071862	1.1435	0.554065
EARS2	-0.04091	0.239582	0.620546	0.833436	-0.8397	0.22281	0.652065	0.579657	-0.84893	0.322747	0.491138	0.786547
EBNA1BP2	0.022343	0.592377	0.227402	0.992295	-0.557417	0.264037	0.578336	0.676369	-0.216695	0.349047	0.457117	0.83345
EBP	0.0690353	0.213837	0.669918	0.858279	0.783483	0.0177395	1.75106	0.0815637	1.14207	0.0419647	1.37712	0.404381
ECD	-0.163102	0.368602	0.433443	0.785645	-1.99447	0.0240163	1.61949	0.100475	-1.84603	0.0679103	1.16806	0.239885
EDC3	0.050963	0.48656	0.312864	0.989974	0.851423	0.0107219	1.96973	0.0676347	1.10964	0.20124	0.696285	0.648804
EDC4	0.167987	0.288359	0.540066	0.850155	0.580697	0.0913777	1.03916	0.290096	0.776193	0.127555	0.894301	0.764422
EEF1A1	-0.344917	0.00924773	2.03397	0.097966	-3.01577	0.000275998	3.55909	0.00550967	-3.07243	0.00185279	2.73217	0.0207267
EEF1G	0.10436	0.367533	0.434703	0.881156	-0.72201	0.27752	0.556706	0.633623	-0.991233	0.272617	0.564448	0.697188
EEF2	-0.156283	0.31152	0.506514	0.937637	-1.7143	0.0149772	1.82457	0.0634097	-2.35707	0.00708872	2.14943	0.04643
EFL1	0.130502	0.149498	0.825365	0.731306	-0.207557	0.812073	0.0904048	0.999997	-0.0616033	0.797677	0.0981731	0.999997
EGF	0.248363	0.0308243	1.51111	0.526381	0.836	0.026525	1.57635	0.11427	1.01657	0.267212	0.573145	0.757532
EGFR	-0.375033	0.0101257	1.99458	0.0979533	-0.9914	0.0675	1.1707	0.188646	-1.05337	0.107723	0.967692	0.332024
EGFR_T790M_noCDNA	0.0273957	0.20338	0.691692	0.899914	0.856947	0.0179471	1.74601	0.0933233	0.69771	0.304042	0.517066	0.891269
EGR3	0.15903	0.260931	0.583474	0.748297	0.78837	0.0124432	1.90507	0.065794	0.96524	0.24108	0.617838	0.707964
EIF1AD	0.109494	0.0739133	1.13128	0.656154	-1.33317	0.046513	1.33243	0.165047	-1.29437	0.122627	0.911415	0.330338
EIF2B1	-0.005481	0.526667	0.278464	0.999978	-1.592	0.0243797	1.61297	0.104547	-1.2143	0.057929	1.2371	0.203835
EIF2S3	-0.41621	0.00586346	2.23185	0.0734217	-2.53763	0.00124489	2.90487	0.012961	-1.8333	0.0640158	1.19371	0.187809
EIF3C	-0.323697	0.0277244	1.55714	0.206974	-1.573	0.00413997	2.383	0.026844	-1.0448	0.144813	0.839192	0.364733
EIF3CL	-0.332173	0.0397426	1.40074	0.285142	-2.0263	0.014479	1.83926	0.0682623	-1.59262	0.0611897	1.21332	0.208404
EIF3D	-0.00569067	0.416836	0.380035	0.832575	-0.505327	0.393197	0.405389	0.703417	0.06839	0.800347	0.0967219	0.999997
EIF4A1	-0.430527	0.0136448	1.86503	0.12811	-2.21727	0.00827162	2.08241	0.0419137	-2.1798	0.00814607	2.08905	0.0547487
EIF4A2	0.0567791	0.588987	0.229895	0.921523	0.712263	0.0436697	1.35982	0.15503	0.88818	0.409057	0.388217	0.953715
EIF4A3	-1.01167	3.4936e-06	5.45673	0.000215333	-3.38653	0.00158962	2.79871	0.0147507	-2.94877	0.000287641	3.54115	0.00694367
EIF4B	-0.121727	0.230937	0.636507	0.900276	-0.314633	0.626493	0.203084	0.988419	0.00217	0.71103	0.148112	0.999997
EIF4E	-0.370497	0.00657388	2.18218	0.080173	-2.4899	0.000562477	3.2499	0.008624	-2.7462	0.000823343	3.08442	0.013346
EIF4G1	-0.287927	0.0509531	1.29283	0.311679	-1.37193	0.0360533	1.44305	0.135031	-1.62437	0.0785916	1.10462	0.250117
ELAVL1	0.176417	0.099775	1.00098	0.683852	-0.377207	0.822293	0.0849732	0.999997	-1.02708	0.144088	0.841373	0.406772
ELL	-0.165347	0.20651	0.68506	0.713219	-1.86363	0.0126227	1.89885	0.059258	-2.3417	0.0445223	1.35142	0.143459
ELP3	0.0971525	0.33833	0.470659	0.907983	-1.87763	0.00262608	2.58069	0.0195273	-1.52173	0.0105077	1.97849	0.0613237
EMC2	0.149816	0.273436	0.563144	0.853343	0.00944333	0.833967	0.0788513	0.999997	0.00109	0.8533	0.0688983	0.999997
EMP1	0.107266	0.166653	0.778186	0.732003	0.776237	0.0600043	1.22182	0.209699	0.985873	0.270079	0.568509	0.535784
ENO2	0.170407	0.105953	0.974887	0.69752	0.818807	0.0142134	1.8473	0.0687483	0.863007	0.265053	0.576667	0.941016
EPC2	0.00529433	0.61668	0.20994	0.999978	-0.0908623	0.942817	0.0255727	0.999997	-0.459577	0.520803	0.283326	0.946817
EPHB6	0.060718	0.388207	0.410937	0.905347	0.66847	0.152625	0.816373	0.425069	0.54252	0.38247	0.417403	0.999997
ERBB2	0.0529993	0.529783	0.275902	0.999978	0.28805	0.4716	0.326426	0.876825	0.0321167	0.660157	0.180353	0.999997
ERBB3	-0.0214267	0.449807	0.346974	0.997734	0.301813	0.576353	0.239311	0.963864	0.167431	0.608673	0.215616	0.999997
ERCC2	-0.118844	0.361257	0.442184	0.926728	-2.31693	0.00132176	2.87885	0.012946	-2.32373	0.00143124	2.84429	0.017215
ERCC6L	0.124702	0.168629	0.773067	0.756612	-0.241297	0.68844	0.162134	0.999997	-0.399633	0.466437	0.331207	0.978852
EREG	0.21619	0.0570434	1.24379	0.512338	0.84286	0.00179689	2.74548	0.0228867	1.07678	0.122677	0.911238	0.648251
ERH	-0.050495	0.499742	0.301254	0.799411	-1.9666	0.012974	1.88693	0.0633227	-2.38423	0.00740313	2.13058	0.0461857
ERO1A	0.227693	0.0590609	1.2287	0.553166	0.57379	0.0587683	1.23086	0.210271	-0.428569	0.582383	0.234791	0.899659
ESRP1	0.148019	0.121071	0.916962	0.666286	0.695503	0.0457657	1.33946	0.171042	2.15693	3.4936e-06	5.45673	0.000554667
ETF1	-0.470037	0.0195632	1.70856	0.155498	-2.07173	0.00977183	2.01002	0.0503337	-2.76073	0.00925916	2.03343	0.0552693
EXOSC1	-0.0907377	0.34761	0.458908	0.949623	-1.21843	0.099065	1.00408	0.298926	-1.20413	0.172193	0.763985	0.502469
EXOSC2	0.061215	0.180773	0.742866	0.823598	-1.9975	0.0210701	1.67633	0.0830477	-1.9098	0.0463269	1.33417	0.170936
EXOSC3	-0.0296363	0.203622	0.691175	0.790592	-1.75463	0.0863397	1.06379	0.270666	-1.19179	0.199813	0.699377	0.517884
EXOSC4	-0.135959	0.278095	0.555807	0.794138	-2.16967	0.0170382	1.76858	0.0767517	-1.28603	0.130188	0.88543	0.370095
EXOSC5	-0.136283	0.335107	0.474817	0.884737	-1.86687	0.00430528	2.366	0.02665	-1.97143	0.00898449	2.04651	0.0532857
EXOSC6	-0.0922107	0.414943	0.382011	0.999978	-1.5461	0.019349	1.71334	0.0845043	-1.3069	0.018061	1.74326	0.0944063
EXOSC7	0.137746	0.395515	0.402837	0.879435	-1.50293	0.0100067	1.99971	0.053577	-1.53813	0.042093	1.37579	0.157254
EXOSC8	0.137358	0.071901	1.14327	0.63401	-0.520147	0.57864	0.237592	0.990695	-0.158259	0.540873	0.266904	0.999997
EXOSC9	0.103789	0.374248	0.42684	0.838893	-1.09137	0.0483545	1.31556	0.159303	-1.08386	0.130438	0.884595	0.335504
F2	-0.068973	0.415773	0.381143	0.999978	-0.589023	0.326833	0.485674	0.750577	-0.472857	0.41373	0.383283	0.953802
F2	-0.037786	0.59351	0.226572	0.999978	0.319277	0.576497	0.239203	0.982014	0.21687	0.9081	0.0418663	0.999997
F2R	0.18509	0.203672	0.691068	0.791276	0.65614	0.0801128	1.0963	0.234591	0.873983	0.41737	0.379478	0.846499
F8A3	-0.0256303	0.320793	0.493775	0.936722	0.75864	0.0693533	1.15893	0.243226	0.72788	0.195562	0.708716	0.778061
FAM153A	0.17703	0.102795	0.988028	0.704473	0.77603	0.0167264	1.7766	0.0876707	0.991353	0.065247	1.18544	0.531096
FAM205A	0.112766	0.406299	0.391154	0.870953	0.552017	0.183006	0.737535	0.492287	0.826543	0.223718	0.650298	0.720243
FAM96B	0.0791607	0.38001	0.420205	0.979976	-0.892447	0.19569	0.708431	0.524712	-1.01055	0.165525	0.781136	0.458089
FARS2	0.166897	0.322757	0.491125	0.892331	-0.622723	0.395003	0.403399	0.937525	-0.77694	0.210156	0.677459	0.433282
FAS	0.19063	0.221112	0.655387	0.727212	0.885983	0.00359497	2.44431	0.0307087	1.0494	0.167731	0.775388	0.820938
FASLG	0.175047	0.250553	0.6011	0.863602	0.727103	0.0328134	1.48395	0.136652	0.70327	0.384177	0.415469	0.999997
FAU	-0.460827	0.00331548	2.47945	0.04306	-2.88427	0.00138464	2.85866	0.0126497	-2.86973	0.00109118	2.9621	0.0136083
FBL	-0.221793	0.0968637	1.01384	0.581574	-2.13823	0.005654	2.24764	0.0349963	-1.85337	0.0885463	1.05283	0.264656
FBXO5	-0.2324	0.258	0.588381	0.398092	-0.42564	0.54095	0.266843	0.883014	-0.248655	0.395853	0.402466	0.929778
FBXW11	0.163496	0.318131	0.497394	0.808833	-0.475933	0.552413	0.257736	0.871853	-1.63846	0.086724	1.06186	0.239438
FDX1	0.0385647	0.372497	0.428878	0.963376	0.144938	0.39726	0.400925	0.900647	0.36496	0.62567	0.203655	0.999997
FDX1L	-0.131587	0.44606	0.350607	0.999978	-1.71273	0.04926	1.30751	0.167141	-1.19391	0.126498	0.897915	0.388039
FDXR	0.16929	0.218454	0.660641	0.786032	-2.01513	0.00155702	2.80771	0.0143943	-1.668	0.0090567	2.04303	0.056622
FECH	0.170824	0.256038	0.591696	0.74594	-0.0529303	0.876127	0.0574331	0.999997	0.462657	0.845413	0.0729309	0.999997
FEN1	0.0650086	0.494057	0.306223	0.964247	-0.05752	0.75853	0.120027	0.999997	0.184036	0.517517	0.286076	0.999997
FEZ1	0.100369	0.195793	0.708204	0.782842	0.841037	0.014169	1.84866	0.078461	0.788463	0.61707	0.209666	0.999997
FGFR1OP	0.12477	0.198365	0.702535	0.740131	0.191958	0.424677	0.371942	0.840007	0.46219	0.503013	0.298421	0.999997
FHIT	0.008542	0.646727	0.189279	0.986145	0.65734	0.069432	1.15844	0.228339	0.880617	0.165665	0.780769	0.815327
FIP1L1	0.0129073	0.530847	0.275031	0.964826	-1.27867	0.211489	0.674712	0.546637	-1.03702	0.250807	0.60066	0.579271
FOXO3	0.045539	0.509577	0.29279	0.942932	0.447543	0.308653	0.510529	0.638338	0.459503	0.490397	0.309452	0.999997
FPGS	0.103526	0.31933	0.49576	0.875414	-1.4452	0.120431	0.919263	0.355823	-1.4234	0.085371	1.06869	0.276977
FURIN	-0.183287	0.368393	0.433688	0.998479	-0.658317	0.193247	0.713888	0.50164	-1.33677	0.151343	0.820037	0.442293
GADD45A	0.140507	0.121047	0.917046	0.685161	0.217693	0.646787	0.189239	0.999997	0.48696	0.683647	0.165168	0.999997
GADD45B	0.23244	0.153536	0.813791	0.624456	0.83731	0.00233493	2.63173	0.0252767	0.860993	0.421403	0.375302	0.95777
GALC	0.23779	0.026532	1.57623	0.529033	0.992717	0.000425065	3.37154	0.01124	1.1291	0.0172785	1.76249	0.308834
GART	-0.0512637	0.331727	0.47922	0.89849	-2.10893	0.00273551	2.56296	0.019803	-2.64697	0.00239315	2.62103	0.023115
GATB	0.112258	0.326746	0.48579	0.83959	-0.328143	0.73906	0.13132	0.999997	-0.189271	0.54213	0.265897	0.955171
GCH1	0.149717	0.317994	0.497581	0.894463	0.758353	0.0258424	1.58767	0.109563	0.690757	0.356493	0.447949	0.894034
GCN1	0.105531	0.310123	0.508466	0.851098	0.10592	0.855067	0.068	0.999997	0.57994	0.39475	0.403678	0.999997
GDF2	0.096764	0.513243	0.289677	0.999978	0.34338	0.435597	0.360915	0.874179	0.849953	0.462967	0.33445	0.932747
GEMIN2	0.105735	0.295683	0.529174	0.75245	-0.329607	0.3568	0.447575	0.864301	-0.191165	0.33856	0.470364	0.780431
GEMIN4	0.188353	0.242061	0.616076	0.781852	-0.211092	0.508193	0.293971	0.973496	-0.316325	0.419347	0.377427	0.951242
GEMIN5	0.0728113	0.141544	0.84911	0.755744	-0.968713	0.251797	0.59895	0.653844	-1.15927	0.079491	1.09968	0.269585
GEMIN6	0.191223	0.0556183	1.25478	0.607904	-1.28993	0.0926977	1.03293	0.288333	-1.17817	0.104834	0.979498	0.314318
GEMIN7	-0.036997	0.54006	0.267558	0.999978	-0.503153	0.49733	0.303355	0.881596	-0.834793	0.20516	0.687907	0.55576
GFPT1	-0.0216673	0.078778	1.1036	0.661139	-2.10503	0.0307055	1.51278	0.114186	-1.5721	0.0364293	1.43855	0.154631
GHRL	0.0668933	0.379492	0.420798	0.879435	0.626913	0.106206	0.973852	0.33817	0.53731	0.48989	0.309901	0.999997
GINS1	0.0765603	0.65752	0.182091	0.999978	-1.329	0.084982	1.07067	0.248602	-1.99327	0.00564465	2.24836	0.039479
GINS2	0.022593	0.614097	0.211763	0.999978	-2.69173	0.000362175	3.44108	0.006224	-3.19913	0.000599747	3.22203	0.01002
GINS4	0.117757	0.350097	0.455812	0.948752	-2.0633	0.00585195	2.2327	0.0333397	-2.01367	0.00800613	2.09658	0.0524403
GMNN	-0.13088	0.241593	0.616915	0.804339	-0.128879	0.401517	0.396296	0.943584	-0.0730833	0.43308	0.363432	0.918811
GNA15	0.1683	0.148614	0.827941	0.734455	0.738423	0.0994697	1.00231	0.295098	0.600153	0.3245	0.488785	0.959753
GNL3	-0.0648303	0.383367	0.416386	0.971531	-2.06273	0.0039979	2.39817	0.0264543	-1.84187	0.0840313	1.07556	0.258564
GNPNAT1	0.0645553	0.20811	0.681707	0.799178	-1.19497	0.047736	1.32115	0.167716	-1.15378	0.0284371	1.54611	0.120104
GOLGA8H	0.130697	0.196285	0.707112	0.786979	0.219747	0.378763	0.421632	0.843686	0.476837	0.379583	0.420693	0.880576
GORASP1	0.0493619	0.501525	0.299707	0.841413	0.69735	0.0616917	1.20977	0.220974	0.755677	0.440867	0.355693	0.999997
GPKOW	0.0772463	0.501833	0.29944	0.942555	-1.27727	0.0477435	1.32109	0.157362	-0.788403	0.387089	0.412189	0.576654
GPN1	-0.00224547	0.417047	0.379815	0.967829	-2.01253	0.00511596	2.29107	0.0288083	-1.81873	0.02073	1.6834	0.106092
GPN2	-0.011185	0.57916	0.237201	0.999978	-3.83597	0.000315592	3.50087	0.005427	-3.44003	0.00100033	2.99986	0.0128707
GPR89A	0.026816	0.373586	0.427609	0.890613	-1.04041	0.063432	1.19769	0.188723	0.008149	0.835917	0.077837	0.999997
GPR89B	-0.0236438	0.588033	0.230598	0.999978	-1.13948	0.0849457	1.07086	0.262345	0.0914307	0.936857	0.0283268	0.999997
GPS1	-0.0603667	0.40744	0.389936	0.990961	-0.960203	0.208856	0.680154	0.535094	-0.761917	0.187955	0.725946	0.461306
GPX1	0.0446977	0.468017	0.329739	0.916509	0.50302	0.37093	0.430708	0.759945	0.534487	0.739587	0.131011	0.999997
GPX3	0.071173	0.28724	0.541755	0.859216	0.83338	0.0238488	1.62253	0.0951047	1.0274	0.0743353	1.1288	0.533867
GPX4	0.00761567	0.621563	0.206515	0.996299	-1.29	0.141983	0.847765	0.406972	-1.28926	0.211319	0.675061	0.555626
GRB2	0.13301	0.235394	0.628204	0.719302	-0.54391	0.60014	0.221747	0.938624	-1.4623	0.00165715	2.78064	0.0195123
GRPEL1	-0.0725017	0.541913	0.26607	0.999978	-2.0499	0.053585	1.27096	0.177044	-2.48587	0.00462207	2.33516	0.0355643
GSN	0.116589	0.26761	0.572498	0.879219	0.866217	0.00361593	2.44178	0.0325837	1.24793	0.0145557	1.83697	0.207341
GSPT2	0.098282	0.53239	0.27377	0.943772	0.814783	0.00242577	2.61515	0.026849	0.897373	0.214503	0.668566	0.915855
GSR	0.061999	0.393643	0.404897	0.86921	0.912643	0.00571442	2.24303	0.0435927	0.95564	0.224283	0.649204	0.657817
GSTM1	-0.0134729	0.352533	0.4528	0.93965	0.19297	0.115758	0.936448	0.367768	0.51842	0.282702	0.548671	0.76885
GTF2H3	0.123464	0.448433	0.348302	0.957833	-0.26332	0.59794	0.223342	0.999997	-0.67386	0.375233	0.425699	0.892642
GUCY2D	0.0486239	0.593313	0.226716	0.999978	0.538073	0.283915	0.546812	0.708903	0.8397	0.247182	0.606983	0.887401
GVQW2	0.0513497	0.45223	0.34464	0.839514	0.65498	0.0462424	1.33496	0.156607	0.444423	0.248543	0.604598	0.94704
H1F0	-0.0687573	0.412087	0.385011	0.983814	0.382323	0.472813	0.32531	0.927912	0.64107	0.492487	0.307606	0.932601
H3F3A	-0.22194	0.10919	0.961818	0.604003	-1.2422	0.0793703	1.10034	0.247928	-1.04997	0.15659	0.805236	0.453653
HARS	-0.076275	0.595177	0.225354	0.999978	-2.11483	0.00363224	2.43983	0.0233443	-2.6555	0.0049643	2.30414	0.037976
HASPIN	0.120036	0.18904	0.723446	0.83618	0.535787	0.3259	0.486916	0.61845	0.69358	0.325493	0.487458	0.815268
HAUS2	-0.023063	0.467193	0.330503	0.999978	-0.89836	0.175883	0.754775	0.477657	-0.505913	0.269343	0.569694	0.688227
HAUS5	-0.176403	0.287805	0.540902	0.814025	-1.26457	0.0238302	1.62287	0.0903203	-1.57743	0.0556211	1.25476	0.185496
HAUS8	0.00834833	0.25222	0.59822	0.870259	-0.757223	0.36417	0.438696	0.82255	-0.6558	0.275553	0.559794	0.820375
HCFC1	-0.040182	0.51444	0.288665	0.992229	-1.2264	0.129281	0.888465	0.346351	-1.30353	0.0500159	1.30089	0.178869
HDAC1	0.0259184	0.553447	0.256924	0.999978	0.395787	0.433373	0.363138	0.810785	0.6925	0.55991	0.251882	0.999997
HGF	0.173843	0.263876	0.5786	0.833687	0.846567	0.00157797	2.8019	0.0190887	0.959707	0.156502	0.805481	0.661376
HIST1H1C	0.236697	0.164434	0.78401	0.596497	0.697343	0.0168337	1.77382	0.0894543	0.765547	0.314913	0.501809	0.952733
HIST1H2AI	-0.145768	0.195223	0.709468	0.906398	0.0660769	0.547437	0.261666	0.969026	-0.160997	0.245099	0.610658	0.607172
HIST2H3D	-0.120943	0.174103	0.759193	0.840348	-0.51735	0.466253	0.331378	0.970303	-0.356097	0.56421	0.248559	0.999997
HJURP	0.175753	0.286625	0.542686	0.834239	-0.621987	0.50589	0.295944	0.942701	-0.694547	0.302723	0.518954	0.46408
HMGB2	0.156229	0.306728	0.513247	0.806443	1.04465	0.000255035	3.5934	0.010212	1.25707	0.01879	1.72607	0.256477
HMGCS1	-0.207784	0.193587	0.713125	0.690125	-2.3394	0.000278327	3.55544	0.00574967	-2.76573	0.00233725	2.6313	0.0182283
HMOX1	0.1	0.188356	0.72502	0.806505	0.62137	0.18925	0.722964	0.533879	0.97961	0.194491	0.711101	0.45102
HNRNPD	0.112901	0.103153	0.98652	0.711247	0.510567	0.273393	0.563212	0.71656	0.133453	0.749083	0.12547	0.999997
HRAS	0.0888317	0.143877	0.84201	0.785153	0.544553	0.220587	0.656421	0.605238	0.697163	0.41313	0.383913	0.946101
HSD17B10	0.0419141	0.408827	0.388461	0.999065	-1.57887	0.00166415	2.77881	0.015369	-1.8559	0.00111914	2.95111	0.0171083
HSP90AA1	0.0238317	0.432759	0.363754	0.872589	0.554773	0.219969	0.657639	0.574526	0.296283	0.5394	0.268089	0.999997
HSPA1B	-0.147187	0.348125	0.458265	0.806673	0.395953	0.469307	0.328543	0.883826	0.249207	0.483323	0.315762	0.986116
HSPA5	-0.734803	2.21264e-05	4.65509	0.000863	-2.55983	9.6659e-05	4.01476	0.003698	-4.26497	2.44555e-05	4.61162	0.002946
HSPA8	-0.0483467	0.36814	0.433987	0.999978	-0.341473	0.599437	0.222257	0.999997	0.32124	0.925433	0.0336549	0.999997
HSPB1	0.0302912	0.27187	0.565638	0.788522	0.985503	0.00247234	2.60689	0.0261463	0.965717	0.442057	0.354522	0.680416
HSPD1	0.106841	0.180725	0.742981	0.833694	-2.46587	0.00722374	2.14124	0.040562	-2.18897	0.0217407	1.66273	0.106707
HSPE1	-0.180889	0.288087	0.540477	0.761498	-3.0648	0.000245719	3.60956	0.00576	-2.8348	0.00077675	3.10972	0.00970933
HYAL2	0.0873653	0.577433	0.238498	0.965008	0.677367	0.0622706	1.20572	0.211548	0.55188	0.424833	0.371781	0.885964
HYPK	-0.0626732	0.29467	0.530664	0.808312	-1.60587	0.041054	1.38664	0.149494	-1.29813	0.038471	1.41487	0.156697
IARS	-0.105142	0.53946	0.268041	0.999978	-2.67107	0.00245138	2.61059	0.0178867	-2.49127	0.00528823	2.27669	0.0394837
IER3	0.124581	0.438753	0.35778	0.965008	0.36805	0.517851	0.285795	0.714997	0.278853	0.76555	0.116026	0.999997
IFITM3	-0.0231824	0.583283	0.23412	0.999978	-0.20866	0.782877	0.106307	0.999997	-0.177187	0.73542	0.133465	0.999997
IFNB1	0.141641	0.183188	0.737104	0.748995	0.948847	0.0153151	1.81488	0.0709923	0.752567	0.5407	0.267044	0.999997
IFNGR1	0.0892423	0.261489	0.582547	0.832132	0.78654	0.0166587	1.77836	0.0840363	0.795647	0.674387	0.171091	0.999997
IGF1R	-0.00165553	0.482357	0.316632	0.948752	-0.013558	0.576363	0.239304	0.999997	-0.717383	0.34093	0.467335	0.828537
IGF2R	0.145269	0.184475	0.734063	0.708091	0.84173	0.00114478	2.94128	0.0189433	1.1971	0.161759	0.791132	0.457031
IGFBP4	0.012954	0.56156	0.250604	0.968189	0.708103	0.134087	0.872615	0.346326	0.811117	0.220783	0.656035	0.659613
IGFBP6	-0.22044	0.114793	0.940083	0.666113	0.429087	0.311101	0.507098	0.686941	0.507683	0.44794	0.34878	0.952733
IL18	0.0462989	0.434707	0.361804	0.925475	0.826137	0.0048992	2.30987	0.039404	1.10957	0.0383543	1.41619	0.431081
IL1A	0.0759702	0.421053	0.375663	0.946682	0.558323	0.162764	0.788443	0.45829	0.653397	0.362357	0.440864	0.857474
IL1B	0.12957	0.137614	0.861337	0.752627	0.468927	0.207373	0.683248	0.559463	0.700723	0.447402	0.349302	0.831853
IL6	0.115243	0.178032	0.749501	0.755425	0.7819	0.0191229	1.71845	0.092866	0.841273	0.303293	0.518137	0.959753
ILK	-0.0747187	0.51249	0.290315	0.999978	-0.168896	0.778473	0.108756	0.999997	-0.572367	0.463547	0.333907	0.944046
INCENP	-0.17046	0.366566	0.435848	0.66872	-1.00271	0.213387	0.670832	0.535596	-0.9051	0.156423	0.805698	0.531147
ING3	0.06194	0.119166	0.923848	0.733276	0.464593	0.495492	0.304964	0.758367	0.207367	0.604993	0.218249	0.973287
INO80	-0.0234303	0.518857	0.284953	0.999978	-1.09022	0.119093	0.924115	0.344998	-0.833523	0.357364	0.446889	0.751166
INS-IGF2	0.050773	0.466467	0.331179	0.917701	0.639923	0.0982257	1.00778	0.319257	0.693817	0.151713	0.818977	0.581629
INTS1	0.0495923	0.430993	0.365529	0.938016	-1.92633	0.0197357	1.70475	0.0882577	-1.5188	0.0671737	1.1728	0.225996
INTS10	0.233583	0.0774976	1.11071	0.509764	-1.14279	0.148636	0.827877	0.394739	-1.8152	0.0312927	1.50456	0.134183
INTS7	-0.0196623	0.82107	0.0856198	0.999978	-0.42944	0.567537	0.246006	0.819494	-0.47724	0.522447	0.281958	0.93433
IPO11	-0.099477	0.582653	0.23459	0.999978	-1.5138	0.018471	1.73351	0.081095	-2.0156	0.0152358	1.81714	0.0817123
IREB2	0.105738	0.417344	0.379506	0.844363	-0.571617	0.332177	0.478631	0.63499	-0.213717	0.61891	0.208373	0.999997
IRF1	0.123911	0.250265	0.6016	0.717261	0.78855	0.0489803	1.30998	0.177049	1.02497	0.214424	0.668727	0.764534
ISCA2	0.0648503	0.37853	0.4219	0.984177	-0.4459	0.601387	0.220846	0.999997	-0.118237	0.636247	0.196374	0.95541
ISG20	0.0526807	0.574736	0.240531	0.890613	0.54898	0.0513776	1.28923	0.170177	0.583603	0.487313	0.312192	0.959242
ISY1-RAB43	-0.215543	0.0745413	1.1276	0.523713	-1.56627	0.0335423	1.47441	0.126652	-2.0669	0.0451207	1.34562	0.177797
ISYNA1	-5.3e-05	0.548343	0.260947	0.999978	0.265127	0.61643	0.210116	0.970127	0.21173	0.599077	0.222518	0.999997
ITGB3BP	0.201853	0.0618993	1.20831	0.626179	0.921193	0.00246301	2.60853	0.026274	0.864067	0.215454	0.666645	0.650391
IYD	0.0898173	0.399053	0.398969	0.924741	0.828747	0.00665303	2.17698	0.0472557	0.807227	0.367247	0.435042	0.83653
JMJD1C	0.0971373	0.49381	0.30644	0.964581	0.72286	0.0471403	1.32661	0.177854	0.882697	0.22569	0.646488	0.934314
JUN	-0.0234317	0.333753	0.476574	0.923436	0.65377	0.0920423	1.03601	0.311627	0.319143	0.706737	0.150742	0.999997
KARS	-0.207833	0.239215	0.621212	0.695081	-2.57743	0.00624793	2.20426	0.0363987	-2.55577	0.00383253	2.41651	0.0317017
KAT5	-0.244357	0.140555	0.852154	0.416797	-1.12043	0.311643	0.506342	0.683763	-1.08318	0.257233	0.589673	0.653006
KAT7	0.0135913	0.44207	0.354509	0.999978	-0.0937707	0.81682	0.0878736	0.999997	-0.395962	0.6332	0.198459	0.93322
KAT8	0.00944383	0.66737	0.175633	0.999978	-1.43647	0.124668	0.904245	0.353788	-1.28432	0.142002	0.847705	0.41397
KHSRP	0.0758383	0.369767	0.432072	0.957257	0.253888	0.5926	0.227238	0.961897	0.337982	0.769663	0.113699	0.999997
KIAA0391	0.132438	0.175126	0.75665	0.824077	-0.465457	0.501103	0.300073	0.999997	-0.553763	0.459503	0.337711	0.999997
KIF18A	-0.213523	0.169824	0.770001	0.688966	-1.78707	0.00520903	2.28324	0.032593	-2.12503	0.0152382	1.81707	0.0747373
KIF20A	0.078273	0.44607	0.350597	0.949257	-0.184406	0.83613	0.0777262	0.999997	0.170536	0.8983	0.0465786	0.999997
KIF23	-0.188093	0.28399	0.546697	0.743881	-2.59873	0.00284265	2.54628	0.0195213	-2.656	0.00409557	2.38769	0.0325353
KIF2A	0.156114	0.203911	0.690559	0.773809	0.790473	0.011968	1.92198	0.0610903	0.881047	0.344987	0.462197	0.906146
KIF2B	0.0690567	0.616553	0.210029	0.965008	0.371027	0.39274	0.405895	0.941531	0.318872	0.637657	0.195413	0.999997
KIF2C	-0.0130833	0.431773	0.364744	0.905121	0.298343	0.443694	0.352916	0.719357	0.56184	0.640753	0.193309	0.999997
KIFC3	0.0911165	0.275834	0.559352	0.77404	0.755847	0.0507627	1.29446	0.179164	0.78418	0.42179	0.374904	0.996373
KLHL7	0.130114	0.27072	0.56748	0.892293	0.889157	0.00572624	2.24213	0.043397	1.11371	0.226548	0.64484	0.526587
KNTC1	0.0590137	0.152617	0.816398	0.789017	0.0616303	0.669207	0.17444	0.828069	0.243707	0.397397	0.400776	0.981314
KPNA6	0.115895	0.30942	0.509452	0.864411	0.466573	0.32494	0.488197	0.596232	0.863763	0.29903	0.524285	0.926772
KPNB1	-0.55413	7.33669e-05	4.1345	0.00250367	-2.2748	0.00632917	2.19865	0.037622	-2.52793	0.00662977	2.1785	0.0468463
KRAS	0.154435	0.137486	0.861743	0.758721	0.7753	0.0595016	1.22547	0.203946	0.404933	0.58532	0.232607	0.999997
KRAS_G12V_noCDNA	0.142631	0.292528	0.533833	0.805986	0.998487	0.00212761	2.67211	0.0216733	1.1096	0.114932	0.939561	0.566347
KRT18	0.00820867	0.565473	0.247588	0.998798	0.741717	0.0308246	1.5111	0.1315	1.03998	0.120371	0.919477	0.736952
LAGE3	0.127693	0.35809	0.446008	0.948752	0.314807	0.457577	0.339536	0.959304	-0.284167	0.311143	0.507039	0.784306
LAS1L	0.115195	0.412533	0.384541	0.93031	-1.34363	0.0924387	1.03415	0.288475	-1.528	0.060302	1.21967	0.212375
LEF1	0.0834107	0.378077	0.42242	0.945072	0.60225	0.0782463	1.10654	0.253938	0.780417	0.529533	0.276107	0.999997
LGALS3	0.0130653	0.457923	0.339207	0.965008	0.824113	0.0116819	1.93249	0.0705743	1.00176	0.333663	0.476692	0.671026
LIG1	-0.0498246	0.386613	0.412723	0.961484	-0.000964	0.85864	0.0661889	0.999997	0.231421	0.606967	0.216835	0.999997
LIN37	-0.0507347	0.514583	0.288544	0.956244	0.293223	0.58026	0.236377	0.958282	-0.166658	0.441997	0.354581	0.798206
LIN52	0.0312043	0.169679	0.770371	0.690158	-0.178737	0.551897	0.258142	0.880221	-0.36053	0.57355	0.241429	0.999997
LIN54	0.0297753	0.53772	0.269444	0.980069	0.113	0.61207	0.213199	0.999997	-0.200387	0.563437	0.249155	0.93984
LIN9	-0.03585	0.226661	0.644623	0.880257	-0.66787	0.350373	0.455469	0.812709	-0.854683	0.129643	0.887251	0.476448
LIPT2	-0.0610503	0.647287	0.188903	0.999978	-1.68383	0.126802	0.896874	0.360068	-1.4958	0.149654	0.824911	0.433041
LMNA	0.0394253	0.737183	0.132424	0.999978	0.51555	0.305473	0.515027	0.779533	0.256837	0.479657	0.31907	0.92273
LOC100129083	-0.0853337	0.50901	0.293274	0.999978	-0.310167	0.695053	0.157982	0.999997	-0.2039	0.776447	0.109888	0.999997
LOC441488	-0.0117389	0.758827	0.119857	0.999978	0.475283	0.35852	0.445487	0.806614	0.800357	0.29329	0.532703	0.993632
LRP5	0.0932107	0.43695	0.359568	0.867264	0.65504	0.0603522	1.21931	0.202953	0.686663	0.355253	0.449462	0.999997
LRPPRC	0.0837797	0.350773	0.454973	0.860545	-0.21443	0.698617	0.155761	0.940875	0.126514	0.72698	0.138478	0.999997
LRR1	-0.243393	0.149811	0.824456	0.533336	-2.23953	0.0206557	1.68496	0.0859777	-2.7348	0.0165238	1.78189	0.073079
LRRC37A3	-0.151155	0.308527	0.510707	0.911356	-0.919193	0.125667	0.90078	0.373563	-0.84522	0.376543	0.424185	0.806366
LSG1	0.0622517	0.34156	0.466533	0.905161	-0.967833	0.103272	0.986017	0.30916	-0.76472	0.323263	0.490444	0.698957
LSM1	0.125386	0.449837	0.346945	0.972935	0.424213	0.35016	0.455733	0.779488	0.93228	0.181987	0.73996	0.834603
LSM2	-0.274793	0.0236578	1.62603	0.190464	-2.13303	0.0021719	2.66316	0.0169873	-2.10193	0.0021509	2.66738	0.0234133
LSM3	-0.0537003	0.393	0.405607	0.869607	-1.54687	0.0135287	1.86875	0.068446	-1.8047	0.0671249	1.17312	0.214879
LSM4	-0.0955863	0.568123	0.245557	0.999978	-1.83283	0.0597433	1.22371	0.198343	-1.6819	0.10983	0.959278	0.313178
LSM5	0.019605	0.279507	0.553608	0.885374	-1.2993	0.0727643	1.13808	0.236478	-1.16691	0.153359	0.814291	0.420837
LSM6	-0.20334	0.148427	0.828486	0.604543	-2.66987	9.43273e-05	4.02536	0.003699	-2.17637	0.00557004	2.25414	0.039309
LTV1	-0.0261485	0.396427	0.401837	0.999978	-0.85756	0.302347	0.519495	0.722901	-0.627107	0.280317	0.552351	0.63069
LUM	0.119158	0.384017	0.41565	0.887259	0.683363	0.0902467	1.04457	0.303618	0.703303	0.47361	0.324579	0.999997
LYRM4	0.135137	0.200777	0.697287	0.846908	-1.47907	0.0709064	1.14931	0.215809	-1.83883	0.0229379	1.63945	0.098706
MAD1L1	0.236624	0.0705603	1.15144	0.560105	0.75785	0.139873	0.854267	0.407889	0.543003	0.379053	0.4213	0.915855
MAD2L1	-0.15316	0.453315	0.3436	0.82641	-1.61357	0.0255933	1.59187	0.103917	-2.01297	0.0282229	1.5494	0.122663
MAD2L2	0.0526293	0.60073	0.221321	0.999978	-1.48905	0.208657	0.680568	0.47074	-2.04373	0.0830413	1.08071	0.246423
MADD	0.0919953	0.256792	0.590418	0.861944	0.539107	0.232687	0.633229	0.598106	0.609017	0.152173	0.817661	0.842036
MAGEA12	0.0386617	0.458082	0.339057	0.891817	0.71464	0.0515233	1.288	0.195546	0.609163	0.24532	0.610267	0.953781
MAGOH	-0.060608	0.395037	0.403363	0.999978	-1.29277	0.0226753	1.64445	0.0986363	-1.22058	0.0385547	1.41392	0.159737
MAGOHB	0.008878	0.476913	0.321561	0.950276	0.0246863	0.643927	0.191164	0.999997	-0.0102347	0.618327	0.208782	0.999997
MAN1A1	0.167187	0.157624	0.802377	0.769593	0.93669	0.00113078	2.94662	0.0171133	0.94211	0.328521	0.483437	0.858255
MAP2K1	0.0755223	0.485473	0.313835	0.999978	0.569177	0.18603	0.730418	0.507362	0.948553	0.312617	0.504988	0.848836
MAP2K2	0.0653267	0.542317	0.265747	0.989974	0.668867	0.115912	0.935873	0.343242	0.67309	0.357387	0.446862	0.919352
MAPK1	0.284883	0.0170384	1.76857	0.480708	1.12357	0.00042972	3.36681	0.0127137	0.769413	0.422933	0.373728	0.932601
MAPK11	-0.0648838	0.285223	0.544815	0.91766	0.52325	0.141773	0.848405	0.426341	0.674903	0.355842	0.448743	0.825744
MAPK14	0.110086	0.259593	0.585706	0.88403	0.111706	0.9092	0.0413406	0.999997	0.0575857	0.788193	0.103367	0.999997
MAPK3	0.1522	0.396517	0.401739	0.941568	0.704237	0.068946	1.16149	0.239842	0.72456	0.395128	0.403263	0.842245
MAPKAPK2	0.0545063	0.282	0.549751	0.906557	0.845363	0.00133573	2.87428	0.0194867	1.14429	0.135284	0.868754	0.356822
MAPRE1	0.12165	0.153871	0.812843	0.779991	0.40699	0.441697	0.354876	0.891617	-0.0604587	0.86203	0.0644776	0.999997
MARS	-0.0486294	0.45934	0.337866	0.999978	-2.81393	0.0018528	2.73217	0.0171083	-2.40487	0.00511587	2.29108	0.038339
MASTL	-0.136941	0.244517	0.611692	0.925028	-1.47653	0.0821323	1.08549	0.243364	-1.41657	0.133602	0.874187	0.39165
MAT2A	-0.406687	0.00214393	2.66879	0.0309563	-2.07597	0.00816456	2.08807	0.0443523	-2.02753	0.0322569	1.49138	0.136595
MAX	-0.256183	0.0398262	1.39983	0.303336	-1.7339	0.0592558	1.22727	0.194132	-1.38833	0.112141	0.950234	0.408915
MCL1	-0.0273487	0.586083	0.232041	0.999978	0.35588	0.523177	0.281352	0.968282	-1.03111	0.118741	0.925399	0.465826
MCM10	-0.26732	0.0420717	1.37601	0.338456	-0.176681	0.716097	0.145028	0.999997	-0.18095	0.711153	0.148037	0.999997
MCM2	-0.116748	0.411563	0.385563	0.999978	-1.60573	0.0775927	1.11018	0.250731	-1.20743	0.150038	0.823798	0.421275
MCM3	0.0228597	0.500823	0.300315	0.967838	-2.08973	0.00203215	2.69204	0.0172693	-2.15073	0.00263073	2.57992	0.0258787
MCM4	-0.0278193	0.544067	0.264348	0.999978	-1.43401	0.0330977	1.4802	0.12694	-1.43177	0.0501137	1.30004	0.188102
MCM5	0.0693493	0.798363	0.0977994	0.999978	-1.32383	0.0445357	1.35129	0.159754	-1.46113	0.068507	1.16427	0.239988
MCM6	0.021635	0.65001	0.18708	0.999978	-1.5742	0.0378909	1.42146	0.137139	-1.41336	0.0305613	1.51483	0.137488
MCM7	0.0312302	0.7212	0.141944	0.999978	-2.0391	0.00401185	2.39666	0.0259947	-1.6753	0.0115746	1.93649	0.0658793
MCM8	0.0743253	0.25185	0.598858	0.961087	0.77616	0.0243007	1.61438	0.110133	0.895747	0.340627	0.467721	0.898263
MED12	-0.142071	0.343738	0.463772	0.848547	-0.485127	0.353836	0.451198	0.675088	0.73096	0.413657	0.38336	0.999997
MED14	-0.483743	0.00024339	3.6137	0.00621533	-1.8801	0.00156401	2.80576	0.0148383	-1.4401	0.0140875	1.85117	0.0714707
MED21	-0.143793	0.196159	0.707392	0.638322	-1.30983	0.0591335	1.22817	0.188173	-1.36296	0.0689673	1.16136	0.238564
MFAP1	-0.608323	4.30883e-05	4.36564	0.00177	-2.15343	0.00153138	2.81492	0.0146207	-2.4097	0.00213229	2.67115	0.02085
MGAT3	0.15747	0.351327	0.454289	0.893871	0.444907	0.35391	0.451107	0.80236	0.728497	0.2351	0.628747	0.664065
MGMT	0.152621	0.292311	0.534155	0.811721	0.967303	0.0176254	1.75386	0.093998	1.10437	0.110305	0.957403	0.621638
MIS12	0.153079	0.196363	0.70694	0.802437	-0.286437	0.701543	0.153945	0.999997	0.0293367	0.687097	0.162982	0.999997
MIS18A	-0.0072824	0.59571	0.224965	0.999978	-0.527917	0.333527	0.476869	0.801738	-0.64395	0.262243	0.581296	0.734118
MLXIP	0.0763273	0.0814873	1.08891	0.684228	0.564423	0.269114	0.570064	0.593182	0.32671	0.66849	0.174905	0.999997
MMP2	0.102562	0.449643	0.347132	0.941121	0.763643	0.0035507	2.44969	0.0327297	0.805997	0.346303	0.460543	0.924543
MMS19	0.174183	0.090998	1.04097	0.681244	-2.15813	0.0097879	2.00931	0.0503617	-1.602	0.031113	1.50706	0.124985
MNAT1	0.105864	0.299357	0.523811	0.91302	0.0636443	0.56365	0.24899	0.964569	0.205773	0.517987	0.285681	0.999997
MOB4	-0.143058	0.389173	0.409857	0.928698	-1.44303	0.029767	1.52626	0.119226	-1.50313	0.0289053	1.53902	0.124897
MOCS3	0.0350447	0.649423	0.187472	0.999978	-1.70537	0.000970063	3.0132	0.012054	-2.32247	0.00475012	2.3233	0.034175
MPHOSPH10	0.000309333	0.40478	0.392781	0.999978	-1.45656	0.124123	0.906149	0.34518	-0.843243	0.316707	0.499343	0.772522
MPI	0.167584	0.327319	0.485029	0.707113	-0.57224	0.511073	0.291517	0.999997	-1.498	0.083459	1.07853	0.256246
MPP1	0.152457	0.154293	0.811655	0.762408	0.939343	0.00312447	2.50522	0.0303257	1.04907	0.0736587	1.13278	0.578131
MRPL13	0.121897	0.094397	1.02504	0.681248	-0.708577	0.119791	0.921577	0.344771	-0.765563	0.233187	0.632296	0.606068
MRPL20	0.026303	0.249618	0.602725	0.7412	-0.45984	0.602873	0.219774	0.933339	-0.591063	0.257	0.590067	0.729528
MRPL23	-0.018204	0.58764	0.230889	0.999978	-1.17655	0.149191	0.826258	0.397472	-0.638057	0.369182	0.432759	0.700847
MRPL3	0.0783203	0.130827	0.883302	0.767314	-0.0289953	0.666693	0.176074	0.999997	-0.333207	0.384357	0.415266	0.978449
MRPL37	0.0758573	0.380333	0.419836	0.925836	-0.702877	0.491993	0.308041	0.815469	-0.546342	0.43025	0.366279	0.876423
MRPL4	-0.149262	0.29713	0.527053	0.925036	-0.987207	0.276015	0.559068	0.516104	-1.37431	0.0524213	1.28049	0.179522
MRPL43	0.0243593	0.283453	0.547518	0.958053	-1.644	0.0391883	1.40684	0.144842	-1.20879	0.0604153	1.21885	0.218619
MRPS18C	-0.00128833	0.0031501	2.50168	0.330408	-0.477597	0.346525	0.460265	0.697659	-0.337703	0.326757	0.485776	0.959753
MTBP	-0.27661	0.100485	0.9979	0.556049	-1.7544	0.0103332	1.98577	0.0537347	-1.89297	0.0559606	1.25212	0.186117
MTG2	0.0452977	0.431547	0.364972	0.964413	-0.28515	0.814337	0.089196	0.999997	-0.52224	0.540307	0.26736	0.997541
MTRR	0.108349	0.215937	0.665674	0.84337	0.392147	0.402733	0.394982	0.863072	0.0948902	0.742883	0.129079	0.999997
MYBL2	-0.00523333	0.35216	0.45326	0.992295	-0.8099	0.31989	0.494999	0.793476	-0.459843	0.412137	0.384959	0.79106
MYC	-0.736697	3.37717e-05	4.47145	0.001275	-2.42843	0.000534532	3.27203	0.00702367	-2.49573	0.00581679	2.23532	0.0359373
MYO1F	0.0822464	0.636197	0.196409	0.999978	0.345027	0.514353	0.288738	0.810121	0.48976	0.765773	0.1159	0.999997
MZB1	-0.016321	0.280597	0.551917	0.961212	0.605093	0.254048	0.595084	0.672356	0.680797	0.228263	0.641564	0.873009
NAPA	-0.687443	6.17224e-05	4.20956	0.00196233	-1.88583	0.00219285	2.65899	0.0181067	-2.07313	0.00824391	2.08387	0.0465007
NAPG	0.185417	0.143254	0.843894	0.736672	0.0154993	0.567707	0.245876	0.999997	0.0100697	0.635683	0.196759	0.999997
NAXD	0.12294	0.114314	0.941899	0.728961	0.745257	0.0024444	2.61183	0.027455	1.01711	0.408237	0.389088	0.91138
NBPF10	-0.0245797	0.5487	0.260665	0.999978	-0.175659	0.72172	0.141631	0.999997	0.267606	0.654797	0.183894	0.999997
NCAPG2	-0.106183	0.44447	0.352158	0.999978	-0.90951	0.23242	0.633727	0.604734	-1.32001	0.167991	0.774715	0.437841
NCAPH2	-0.002099	0.3381	0.470955	0.923988	-0.0621947	0.75599	0.121484	0.999997	-0.230573	0.52167	0.282604	0.975986
NCBP1	-0.135085	0.258439	0.587642	0.845885	-1.91797	0.0272682	1.56434	0.109054	-1.77057	0.02669	1.57365	0.12424
NCBP2	0.105662	0.24372	0.613109	0.871518	-1.11891	0.055494	1.25575	0.187009	-1.19137	0.109111	0.96213	0.322655
NDC80	-0.652463	0.000143239	3.84394	0.00369833	-1.8067	0.00618039	2.20898	0.033269	-1.62123	0.00240712	2.6185	0.024009
NDEL1	0.0209094	0.48168	0.317241	0.999978	0.628777	0.129706	0.887039	0.371975	0.72757	0.284917	0.545282	0.97542
NDUFAF1	0.06168	0.38821	0.410933	0.969982	0.0377917	0.85719	0.0669229	0.999997	0.149461	0.739767	0.130905	0.999997
NEDD1	-0.0741943	0.20446	0.689392	0.888032	-1.61283	0.0697457	1.15648	0.226464	-1.4092	0.155685	0.807754	0.437291
NEDD9	0.019879	0.51234	0.290442	0.997734	0.563927	0.115815	0.936234	0.347554	0.441073	0.778173	0.108924	0.999997
NEFH	0.0923277	0.435607	0.360905	0.93334	0.651497	0.0467787	1.32995	0.183634	1.05213	0.124247	0.905714	0.604073
NEK2	0.0389963	0.293613	0.532225	0.853876	0.435153	0.318142	0.497379	0.641732	0.166777	0.866323	0.06232	0.999997
NEUROD1	-0.0260817	0.463817	0.333654	0.999978	0.462003	0.325487	0.487467	0.637462	0.434713	0.5164	0.287014	0.956945
NF2	0.231783	0.0335144	1.47477	0.400023	1.08693	0.000543829	3.26454	0.009348	4.0078	3.4936e-06	5.45673	0.000554667
NFS1	0.168409	0.144394	0.840452	0.731068	-2.1477	0.0412003	1.3851	0.148625	-1.29503	0.146115	0.835306	0.4691
NINL	0.0174357	0.622973	0.205531	0.999978	0.733907	0.0310785	1.50754	0.129989	0.89839	0.239619	0.620479	0.71214
NME6	0.086194	0.601293	0.220914	0.992542	-0.844367	0.170037	0.769456	0.432549	-0.93858	0.12011	0.920419	0.343906
NOB1	-0.0934803	0.197024	0.705481	0.782485	-0.775703	0.227273	0.643452	0.595006	-1.2609	0.139158	0.856492	0.40949
NOC3L	-0.005801	0.791293	0.101662	0.999978	-1.54053	0.0168616	1.7731	0.0670293	-0.95139	0.12082	0.917861	0.357725
NOL7	0.0731367	0.50895	0.293325	0.947794	-0.35152	0.539317	0.268156	0.918	-0.152451	0.538153	0.269094	0.999997
NOL9	0.0856043	0.567137	0.246312	0.996299	-1.7302	0.016694	1.77744	0.0786597	-1.54	0.0759467	1.11949	0.242875
NOP53	-0.00205733	0.484937	0.314315	0.989453	-0.879503	0.225619	0.646624	0.57366	-0.777323	0.363903	0.439014	0.883381
NOP56	-0.177423	0.2267	0.644548	0.959746	-2.27687	0.0288866	1.5393	0.109058	-1.93267	0.0157132	1.80374	0.082266
NOS3	0.0893757	0.238777	0.622008	0.851584	0.87096	0.0124082	1.90629	0.067691	0.829463	0.40267	0.395051	0.999997
NOSIP	0.0360294	0.402563	0.395166	0.968916	-0.713993	0.233853	0.631056	0.602456	-1.2129	0.069045	1.16087	0.34761
NOTO	0.106699	0.388959	0.410096	0.880606	0.69004	0.232745	0.63312	0.380486	0.971373	0.145967	0.835746	0.783444
NRAS	0.0318731	0.119317	0.923298	0.700323	0.471427	0.312674	0.504908	0.674253	-0.305966	0.64894	0.187795	0.84433
NSL1	-0.0184445	0.363174	0.439886	0.866204	-0.74878	0.351983	0.453478	0.859481	-1.12889	0.221787	0.654065	0.572877
NSMCE2	0.109864	0.25323	0.596484	0.846702	-0.07561	0.804103	0.0946881	0.999997	-0.359077	0.507373	0.294672	0.999997
NSMCE3	0.00496167	0.59413	0.226119	0.999978	-0.96434	0.196743	0.706101	0.522668	-1.39667	0.0935943	1.02875	0.302143
NUBP1	0.105935	0.229959	0.63835	0.825959	-2.35093	0.040258	1.39515	0.136301	-1.85603	0.0449945	1.34684	0.169451
NUBP2	0.051482	0.748737	0.125671	0.999978	-2.04263	0.0114439	1.94143	0.056239	-1.34293	0.0167472	1.77606	0.0873377
NUDC	0.211303	0.280766	0.551656	0.641904	-1.41437	0.0609317	1.21516	0.186211	-0.806777	0.280071	0.552732	0.61725
NUF2	-0.509963	0.000227088	3.64381	0.005433	-1.97973	0.00170374	2.7686	0.01503	-1.71647	0.0173179	1.7615	0.0834513
NUMA1	-0.00511833	0.288347	0.540085	0.953271	-0.0389647	0.55155	0.258415	0.955361	-0.446647	0.381713	0.418263	0.836245
NUP107	-0.0564543	0.177254	0.751405	0.705824	-0.448213	0.60552	0.217872	0.999997	-0.541753	0.30376	0.517469	0.844795
NUP133	0.157627	0.0552633	1.25756	0.636288	-0.864813	0.219633	0.658302	0.590366	-1.01371	0.186556	0.729191	0.462293
NUP153	0.12828	0.124921	0.903366	0.700965	0.26738	0.673693	0.171538	0.974468	-0.051141	0.64615	0.189667	0.999997
NUP155	0.043572	0.669273	0.174396	0.999978	-1.09874	0.21855	0.660449	0.570862	-0.853257	0.20689	0.684261	0.560235
NUP188	0.216593	0.07211	1.142	0.666954	0.514337	0.239833	0.62009	0.646533	0.59285	0.433857	0.362654	0.999997
NUP205	-0.203943	0.150401	0.822748	0.713625	-0.777557	0.37534	0.425575	0.838425	-0.778347	0.461287	0.336029	0.822811
NUP210	0.13127	0.179804	0.745201	0.790291	0.411683	0.258021	0.588345	0.553817	0.676503	0.578537	0.237669	0.999997
NUP214	0.0211663	0.42933	0.367209	0.945072	-1.05197	0.126672	0.897318	0.357543	-0.825003	0.28214	0.549535	0.709026
NUP35	0.0111047	0.409697	0.387538	0.948752	0.24819	0.561957	0.250297	0.835542	0.49842	0.742	0.129596	0.999997
NUP37	0.0515063	0.466027	0.331589	0.980661	0.0921313	0.9278	0.0325456	0.999997	-0.204845	0.7376	0.132179	0.999997
NUP43	0.21894	0.052429	1.28043	0.61451	-0.603603	0.367143	0.435164	0.741719	-1.25637	0.117349	0.930519	0.351871
NUP50	0.113312	0.372303	0.429103	0.954259	0.0570625	0.92276	0.0349112	0.999997	-0.191106	0.614293	0.211624	0.826849
NUP54	0.00624497	0.513077	0.289818	0.996202	-0.276977	0.702487	0.153362	0.999997	-0.321863	0.675773	0.170199	0.999997
NUP62	-0.138189	0.362657	0.440504	0.986779	-1.13912	0.111689	0.951988	0.322738	-1.29335	0.0436857	1.35966	0.170299
NUP85	-0.070091	0.539957	0.267641	0.999978	-2.5202	0.00104226	2.98202	0.0116657	-2.64533	0.00141726	2.84855	0.0165807
NUP88	-0.00443567	0.391523	0.407242	0.999978	-1.3261	0.0434761	1.36175	0.152321	-1.5298	0.0224908	1.64799	0.0953063
NUP93	-0.123796	0.384693	0.414885	0.986959	-0.99421	0.20364	0.691137	0.544396	-1.04534	0.225207	0.647419	0.596809
NUPL2	0.0964113	0.230617	0.637109	0.855635	0.62169	0.146239	0.834937	0.417849	0.50646	0.654803	0.183889	0.999997
OFD1	0.0280267	0.422307	0.374372	0.948752	0.72911	0.0314022	1.50304	0.118761	1.09216	0.0234529	1.6298	0.32199
OR13J1	0.0862503	0.52284	0.281631	0.974419	0.579613	0.184226	0.73465	0.411524	0.81298	0.529877	0.275825	0.999997
OR1M1	-0.0811477	0.331027	0.480137	0.999978	0.202585	0.66953	0.17423	0.974127	0.534617	0.245123	0.610615	0.977371
OR4D9	0.0583687	0.392097	0.406607	0.910593	0.65799	0.0539243	1.26822	0.203381	0.587	0.472357	0.32573	0.999997
ORAOV1	0.041623	0.420917	0.375804	0.927667	-2.51727	0.000713875	3.14638	0.00941167	-2.97237	0.00658336	2.18155	0.0409963
ORC1	-0.0552002	0.591357	0.228151	0.999978	-0.32717	0.56954	0.244476	0.999997	-0.303443	0.47168	0.326353	0.945961
ORC2	0.0826803	0.43479	0.36172	0.938016	-0.242457	0.630567	0.200269	0.999997	-0.115911	0.48581	0.313534	0.999997
ORC3	0.155047	0.334977	0.474985	0.821365	-0.798817	0.284318	0.546196	0.675142	-0.525537	0.48073	0.318099	0.94729
ORC4	0.114471	0.348932	0.457259	0.796797	-1.2304	0.0133841	1.87341	0.0567037	-1.52927	0.0376209	1.42457	0.145596
ORC5	0.220783	0.052499	1.27985	0.575844	-0.27796	0.531683	0.274347	0.966634	-0.278024	0.29151	0.535347	0.822731
ORC6	-0.0891167	0.40614	0.391324	0.999978	-0.85058	0.255623	0.5924	0.658134	-0.68402	0.376707	0.423997	0.81709
OXA1L	-4.32667e-05	0.522547	0.281875	0.992295	-0.870553	0.303473	0.517879	0.750416	-0.516177	0.542983	0.265214	0.980873
OXCT2	-0.07116	0.307277	0.51247	0.976657	0.229433	0.563933	0.248772	0.999997	0.442733	0.642823	0.191908	0.999997
P2RX5	0.090191	0.35232	0.453063	0.932868	0.606153	0.122069	0.913396	0.3659	0.315665	0.73378	0.134434	0.999997
PABPC1	-0.05182	0.425543	0.371056	0.999978	-1.17812	0.219116	0.659326	0.552164	-0.938587	0.140317	0.852891	0.421784
PAF1	-0.156007	0.46565	0.33194	0.966524	-0.617723	0.371759	0.429739	0.69971	-0.544057	0.47495	0.323352	0.702376
PAFAH1B1	-0.147646	0.198146	0.703015	0.655208	-2.18457	0.0056469	2.24819	0.0344047	-1.97137	0.020276	1.69302	0.099919
PAFAH1B2	0.18833	0.21686	0.663821	0.726042	1.19373	2.44557e-05	4.61162	0.004176	0.978897	0.136362	0.865307	0.724375
PAICS	0.0519603	0.526067	0.278959	0.996177	-2.09667	0.000499607	3.30137	0.00708233	-2.1866	0.0010912	2.9621	0.0168943
PAIP1	0.0830627	0.284407	0.54606	0.90172	0.628267	0.115732	0.936545	0.350773	0.187202	0.684533	0.164605	0.999997
PAK1	0.0954207	0.131062	0.882523	0.766233	0.688487	0.0236626	1.62594	0.106164	0.71025	0.252437	0.597848	0.897872
PAK1IP1	-0.0251797	0.502193	0.299129	0.93334	-2.54533	0.00723533	2.14054	0.0392703	-2.32727	0.00659704	2.18065	0.044562
PAQR9	0.19717	0.123985	0.90663	0.679874	0.953053	0.019172	1.71733	0.078086	0.983927	0.124717	0.904074	0.594462
PARN	0.108835	0.382607	0.417247	0.912417	-0.05282	0.935827	0.0288046	0.999997	-0.160511	0.847877	0.0716673	0.999997
PATL1	0.0871357	0.0862797	1.06409	0.656496	0.832133	0.0390092	1.40883	0.13645	0.78091	0.321243	0.493166	0.908809
PAX5	0.0410153	0.697553	0.156423	0.999978	0.405017	0.55413	0.256388	0.958275	0.783707	0.51847	0.285276	0.943033
PCBP1	-0.0776673	0.40038	0.397528	0.999978	-1.30963	0.0613353	1.21229	0.175129	-1.12434	0.197615	0.704179	0.510827
PCDH7	-0.0496313	0.53891	0.268484	0.999978	0.564063	0.0954348	1.02029	0.292247	0.63822	0.409763	0.387468	0.902442
PCID2	-0.0342687	0.337123	0.472211	0.891083	-1.25543	0.0473569	1.32462	0.158668	-1.71597	0.0394467	1.40399	0.161506
PCM1	0.17626	0.156372	0.80584	0.781691	0.754417	0.0796598	1.09876	0.251883	0.30807	0.683357	0.165353	0.999997
PCNA	-0.285543	0.0186562	1.72918	0.178622	-2.45443	0.00037382	3.42734	0.007309	-2.3747	0.0258007	1.58837	0.0998657
PCNT	0.16042	0.179131	0.74683	0.718579	0.341067	0.397217	0.400973	0.790121	-0.037597	0.849697	0.0707361	0.999997
PDCD11	-0.205517	0.160499	0.794529	0.678179	-2.28223	0.00110748	2.95566	0.0123147	-2.35527	0.000536844	3.27015	0.00989067
PDCD4	0.091325	0.40048	0.397419	0.971507	0.718027	0.087961	1.05571	0.272291	0.827093	0.393744	0.404786	0.782351
PDCD7	-0.214623	0.153631	0.81352	0.733329	-1.19667	0.10323	0.986193	0.314983	-1.31968	0.149792	0.824512	0.431312
PDE11A	0.0840697	0.60686	0.216911	0.999978	0.249183	0.710653	0.148342	0.980396	0.64687	0.4305	0.366027	0.947012
PDE4C	0.0541467	0.35563	0.449002	0.946915	0.241063	0.458627	0.338541	0.941991	0.6881	0.176775	0.752578	0.661162
PDGFRB	0.131415	0.214267	0.669045	0.814387	0.869187	0.00158031	2.80126	0.0219943	1.19233	0.015718	1.8036	0.244301
PDPK1	-0.0448033	0.515543	0.287735	0.979976	-0.980567	0.27293	0.563949	0.696674	-1.28232	0.156893	0.804396	0.433068
PEA15	0.129595	0.452359	0.344517	0.830732	0.758643	0.071734	1.14427	0.249869	0.888763	0.0885875	1.05263	0.462052
PELP1	-0.036828	0.43746	0.359062	0.974192	-2.0063	0.0083953	2.07596	0.045666	-1.368	0.062062	1.20717	0.223843
PET117	0.092105	0.321316	0.493067	0.819554	-0.64267	0.306477	0.513603	0.653916	-0.582703	0.377673	0.422884	0.808833
PFDN5	0.0184566	0.487993	0.311586	0.989974	-1.36305	0.0510449	1.29205	0.162901	-1.13433	0.13773	0.860971	0.415861
PGD	-0.161155	0.288213	0.540286	0.971531	-2.71293	0.00168046	2.77457	0.015831	-3.20413	0.00363221	2.43983	0.0286977
PGGT1B	0.0973127	0.0733363	1.13468	0.644814	-0.887677	0.0883057	1.05401	0.271194	-2.03797	0.00250727	2.6008	0.0257183
PGK1	0.15983	0.231039	0.636314	0.779712	-1.2269	0.062489	1.2042	0.209037	-1.21507	0.0696053	1.15736	0.235559
PGM3	0.0986703	0.214209	0.669162	0.854293	-1.53157	0.0064201	2.19246	0.0377527	-2.06028	0.0455338	1.34167	0.156704
PHAX	-0.021676	0.531227	0.27472	0.999978	-2.31367	0.033694	1.47245	0.127786	-1.83473	0.0280787	1.55162	0.130656
PHF5A	-0.371543	0.0340385	1.46803	0.258354	-2.52677	0.00153372	2.81425	0.015128	-2.225	0.0030546	2.51505	0.0287983
PI4KA	-0.012063	0.554373	0.256198	0.999978	-1.2482	0.0729108	1.13721	0.209423	-1.0965	0.105094	0.978422	0.29276
PIAS3	-0.000308667	0.50587	0.295961	0.97212	0.58109	0.141444	0.849415	0.416462	0.58316	0.321047	0.493432	0.990658
PIK3CA	-0.080234	0.419207	0.377572	0.988129	-0.130324	0.638787	0.194644	0.874185	-0.482627	0.421493	0.375209	0.948053
PIK3CA_E545K_noCDNA	0.0670907	0.42361	0.373034	0.932334	0.901497	0.00142657	2.84571	0.0197637	1.2631	0.0384825	1.41474	0.360552
PIK3CB	0.0540977	0.43909	0.357446	0.946682	0.656653	0.171045	0.766889	0.470446	0.457397	0.445293	0.351354	0.975108
PIK3CD	0.00217967	0.34409	0.463328	0.918287	0.619587	0.167969	0.77477	0.476773	0.671157	0.168003	0.774684	0.799
PIK3CG	0.115136	0.129733	0.886951	0.757975	0.817537	0.0122311	1.91253	0.070877	0.900473	0.151056	0.820862	0.533683
PIK3R1	0.0428667	0.481647	0.317271	0.943663	0.690943	0.0711957	1.14755	0.251148	0.817817	0.254074	0.59504	0.846534
PIK3R2	0.0795757	0.385267	0.414239	0.871945	0.227953	0.64913	0.187668	0.999997	0.452453	0.168529	0.773326	0.832365
PIK3R3	-0.0173345	0.49049	0.30937	0.948752	0.689543	0.103464	0.985209	0.327332	1.07083	0.0788448	1.10323	0.367607
PIK3R5	0.155926	0.272228	0.565068	0.697278	0.814053	0.0165097	1.78226	0.0830917	1.07153	0.205636	0.6869	0.49674
PKMYT1	0.0418927	0.568077	0.245593	0.999978	-1.06995	0.115521	0.937339	0.337757	-1.43623	0.0695593	1.15764	0.234207
PKN2	-0.112	0.427573	0.368989	0.986998	-0.125724	0.89488	0.0482352	0.999997	-1.14967	0.0946833	1.02373	0.310089
PLAT	-0.0724123	0.698547	0.155805	0.999978	0.59325	0.0879093	1.05597	0.297416	0.75792	0.56342	0.249168	0.966353
PLCB2	0.0414303	0.479813	0.318928	0.917427	0.29858	0.443953	0.352663	0.944592	0.388143	0.335883	0.473812	0.999997
PLCG1	0.0787196	0.304607	0.516261	0.901268	0.737057	0.0353265	1.4519	0.141756	0.964413	0.165557	0.781052	0.751697
PLCG2	0.0266827	0.0127715	1.89376	0.446471	0.84812	0.00415161	2.38178	0.0347313	0.76659	0.142308	0.846772	0.652039
PLEKHG6	0.0705527	0.51209	0.290654	0.98677	0.6129	0.186128	0.730188	0.518294	0.61875	0.51854	0.285218	0.999997
PLK1	-0.94756	3.4936e-06	5.45673	0.000215333	-2.48177	0.00273088	2.5637	0.0202873	-2.76463	0.000862937	3.06402	0.014027
PLK4	-0.060074	0.30295	0.518629	0.915184	-1.00961	0.246327	0.608489	0.635995	-0.95043	0.24698	0.607338	0.641157
PMAIP1	-0.060957	0.535327	0.271381	0.999978	0.89823	0.0214893	1.66778	0.107285	0.639897	0.266025	0.575078	0.845875
PMF1	0.0423221	0.278051	0.555876	0.852188	-0.859957	0.347113	0.459529	0.778873	-0.781643	0.266943	0.573581	0.649709
PMS1	0.0934643	0.0899	1.04624	0.709253	0.786743	0.005018	2.29947	0.0404523	1.03841	0.184505	0.733992	0.768927
PNPLA1	0.0945449	0.372623	0.42873	0.915855	0.730957	0.0218737	1.66008	0.10587	0.708843	0.521317	0.282898	0.836462
POLA1	-0.373013	0.0058287	2.23443	0.0737333	-1.67883	0.0680363	1.16726	0.223407	-1.11753	0.154808	0.810208	0.402511
POLA2	-0.300773	0.0317098	1.49881	0.265996	-1.12218	0.170621	0.767968	0.456644	-1.10998	0.191677	0.717431	0.52542
POLD1	-0.088229	0.38636	0.413008	0.979578	-2.40033	0.00270525	2.56779	0.0209923	-2.04763	0.0247759	1.60597	0.107966
POLD2	-0.117357	0.608817	0.215513	0.999978	-1.2672	0.0285092	1.54502	0.109717	-1.83473	0.016773	1.77539	0.0726137
POLD3	-0.0031	0.45804	0.339097	0.999978	0.135647	0.423683	0.372959	0.897667	-0.23257	0.39436	0.404107	0.824913
POLD4	-0.0150227	0.385843	0.413589	0.926752	0.640657	0.0838543	1.07647	0.267888	0.316122	0.606837	0.216928	0.965599
POLE	-0.2264	0.196001	0.707741	0.712288	-2.3146	0.00135203	2.86901	0.0140673	-1.89832	0.0908618	1.04162	0.257714
POLE2	-0.226673	0.184553	0.73388	0.704985	-1.9084	0.0440073	1.35647	0.155793	-1.16162	0.104386	0.981358	0.33144
POLG2	0.143567	0.305862	0.514474	0.784533	-0.747577	0.306567	0.513475	0.759257	-0.621027	0.327733	0.48448	0.609763
POLR1A	0.0115143	0.687447	0.162761	0.999978	-2.25077	0.0542763	1.26539	0.186232	-1.76447	0.087853	1.05624	0.27193
POLR1B	-0.167641	0.278865	0.554607	0.798939	-3.0655	0.000699897	3.15497	0.00996233	-2.9306	0.00912207	2.03991	0.0504107
POLR2A	-1.02656	3.4936e-06	5.45673	0.000215333	-2.83187	0.00159659	2.79681	0.012459	-2.22093	0.0110132	1.95809	0.0600063
POLR2D	-0.477243	0.0028753	2.54132	0.0409083	-2.05333	0.0157341	1.80316	0.074352	-1.81894	0.0287656	1.54113	0.118519
POLR2J	-0.386	0.00111448	2.95293	0.019101	-2.60137	0.000946787	3.02375	0.0120747	-2.32103	0.000758133	3.12025	0.012621
POLR2J3	-0.353013	0.0170711	1.76774	0.15704	-2.40463	0.004494	2.34737	0.027951	-2.49783	0.00575869	2.23968	0.0418227
POLR2K	-0.45696	0.00244439	2.61183	0.036678	-1.74217	0.00127051	2.89602	0.0137277	-1.93087	0.0216663	1.66421	0.100895
POLR3A	-0.177164	0.201333	0.696084	0.90457	-2.7169	0.000667293	3.17568	0.00845467	-2.99453	0.000816343	3.08813	0.0113323
POLR3C	-0.0168213	0.491507	0.308471	0.948752	-1.1106	0.111878	0.951254	0.31917	-1.38767	0.110166	0.957952	0.343651
POLR3F	-0.162407	0.244131	0.612377	0.715636	-1.39193	0.033221	1.47859	0.130273	-1.58437	0.040057	1.39732	0.160677
POM121	0.0307023	0.346227	0.460639	0.902273	0.032815	0.625493	0.203777	0.999997	-0.036852	0.533933	0.272513	0.978196
POP5	0.0585483	0.0378767	1.42163	0.574454	-1.91567	0.0499217	1.30171	0.173527	-2.10233	0.0464513	1.333	0.166092
POTEJ	0.056304	0.567467	0.24606	0.999978	0.377087	0.54449	0.26401	0.951013	0.598467	0.310314	0.508199	0.824485
PPCDC	0.098437	0.405116	0.39242	0.903415	-1.12209	0.14489	0.838962	0.413981	-0.789032	0.27268	0.564347	0.570947
PPFIA1	0.0836617	0.616993	0.20972	0.999978	0.550897	0.234676	0.629531	0.612285	0.639757	0.31966	0.495312	0.877658
PPIAL4D	-0.0274897	0.5646	0.248259	0.999978	-0.404887	0.605917	0.217587	0.983765	-0.0815307	0.767897	0.114697	0.999997
PPIAL4F	-0.297627	0.0333327	1.47713	0.253388	-2.04983	0.00541876	2.2661	0.0322113	-1.69057	0.0100464	1.99799	0.057325
PPOX	0.062971	0.471747	0.326291	0.941068	0.155352	0.839077	0.0761984	0.999997	0.513607	0.543447	0.264843	0.999997
PPP1CB	-0.278303	0.0951156	1.02175	0.43563	-2.12057	0.0307943	1.51153	0.112566	-1.8811	0.042437	1.37226	0.168707
PPP1CC	0.157978	0.153024	0.81524	0.754097	0.735157	0.049224	1.30782	0.18887	0.614697	0.53774	0.269428	0.999997
PPP1R11	-0.0112693	0.647153	0.188993	0.971823	-1.59207	0.0808657	1.09224	0.255423	-1.55787	0.0361673	1.44168	0.151267
PPP2CA	-0.0186737	0.470583	0.327363	0.999978	-1.80607	0.00707697	2.15015	0.0396433	-1.43947	0.0819953	1.08621	0.269492
PPP2CB	0.118983	0.103677	0.984316	0.745159	0.98548	0.000515911	3.28743	0.011377	1.25267	0.0512332	1.29045	0.363479
PPP2R1A	-0.0494763	0.450647	0.346164	0.948752	-0.543173	0.5135	0.28946	0.999997	-0.423197	0.544863	0.263712	0.825138
PPP2R1B	0.134127	0.380165	0.420028	0.881901	0.90217	0.0108174	1.96588	0.053717	1.333	0.00341093	2.46713	0.100487
PPP2R2A	0.192913	0.0695	1.15802	0.635141	-0.0280973	0.895747	0.0478148	0.999997	0.109397	0.644707	0.190638	0.999997
PPP2R3B	-0.00873267	0.540823	0.266945	0.999978	0.864103	0.0174717	1.75767	0.0843737	0.872643	0.250953	0.600408	0.691051
PPP2R5A	0.138573	0.0729413	1.13703	0.66083	1.05725	0.000600918	3.22118	0.00982067	1.06625	0.0827757	1.0821	0.636256
PPP2R5B	-0.0251629	0.404	0.393619	0.968916	0.50181	0.243293	0.61387	0.627	0.211347	0.600127	0.221757	0.977359
PPP2R5C	0.0963833	0.172364	0.763554	0.782469	0.439987	0.349457	0.456607	0.870293	0.749297	0.31376	0.503402	0.915855
PPP2R5D	0.100079	0.48407	0.315092	0.97025	0.644667	0.0905734	1.043	0.286101	0.683493	0.666897	0.175941	0.999997
PPP2R5E	0.181729	0.126411	0.898215	0.637287	0.686877	0.0338967	1.46984	0.146236	1.07552	0.206369	0.685355	0.608906
PPP3R1	0.125789	0.109134	0.962039	0.652875	0.89858	0.00111214	2.95384	0.0193333	1.08183	0.0626443	1.20312	0.582668
PPP4C	0.007895	0.542877	0.265299	0.999978	-2.0684	0.00248397	2.60485	0.0174803	-2.1025	0.00228601	2.64092	0.0210183
PPP6C	0.123943	0.230464	0.637396	0.724653	-2.05387	0.00665787	2.17666	0.0391647	-2.1663	0.00518347	2.28538	0.0384267
PPRC1	-0.0956223	0.432437	0.364077	0.999978	-0.83022	0.199773	0.699464	0.488124	-1.01907	0.0688434	1.16214	0.21337
PPT1	0.0902623	0.667147	0.175779	0.999978	0.57612	0.232286	0.633978	0.435279	0.821417	0.40262	0.395105	0.999997
PRELID3B	-0.259543	0.0237673	1.62402	0.217719	-2.0615	0.0100697	1.99698	0.052089	-1.48995	0.122965	0.910217	0.317953
PRF1	0.05027	0.59833	0.223059	0.974192	0.247453	0.76586	0.115851	0.999997	0.395583	0.717037	0.144459	0.999997
PRH2	0.00621	0.509273	0.293049	0.999854	0.96914	0.00524164	2.28053	0.0418047	0.926537	0.226486	0.644959	0.805515
PRIM1	-0.324183	0.0198124	1.70306	0.16512	-1.57637	0.0339526	1.46913	0.122743	-1.5397	0.0269256	1.56984	0.119981
PRIM2	-0.164798	0.124264	0.905654	0.702226	-1.41397	0.0113344	1.9456	0.055191	-1.24171	0.176025	0.754425	0.467662
PRKACA	0.00420107	0.369053	0.432911	0.950856	0.421793	0.450327	0.346472	0.835326	0.355604	0.65595	0.183129	0.999997
PRKAR2B	0.0902126	0.114731	0.94032	0.704435	0.815917	0.0261291	1.58288	0.111995	0.755603	0.291919	0.534738	0.733942
PRKCA	-0.0898053	0.247132	0.60707	0.828495	0.51991	0.100514	0.997773	0.321572	0.575273	0.512893	0.289973	0.999997
PRKCB	0.15645	0.32386	0.489643	0.917205	0.828143	0.0659307	1.18091	0.220756	0.674913	0.671867	0.172717	0.999997
PRKCD	0.0919677	0.199189	0.700735	0.819985	0.471143	0.127599	0.894153	0.380295	0.637777	0.331243	0.479853	0.962585
PRKCG	-0.00986867	0.379333	0.420979	0.965235	0.28005	0.317023	0.498909	0.757118	0.43021	0.070641	1.15094	0.539461
PRMT1	-0.011291	0.416659	0.380219	0.914661	-2.4402	0.00104693	2.98008	0.0112797	-2.4719	0.000991047	3.00391	0.015505
PRMT5	0.105938	0.46597	0.331642	0.928084	-2.14663	0.0193675	1.71293	0.0786107	-1.66203	0.0487317	1.31219	0.182645
PRPF19	-0.00356033	0.499297	0.301641	0.999978	-2.044	0.00405612	2.39189	0.0263823	-2.4783	0.0049645	2.30412	0.03875
PRPF38B	-0.0916357	0.371127	0.430478	0.93269	-1.93847	0.0526527	1.27858	0.181256	-2.3921	0.0245125	1.61061	0.113639
PRR23C	0.0869017	0.37661	0.424108	0.941421	0.787517	0.0125479	1.90143	0.0692957	0.655973	0.381913	0.418035	0.916949
PRY	0.249587	0.0464737	1.33279	0.598953	1.199	5.82273e-06	5.23487	0.00222767	1.4528	0.000434379	3.36213	0.0279567
PSEN1	-0.0651717	0.58091	0.235891	0.999978	0.605473	0.101199	0.994825	0.324261	0.550933	0.61702	0.209701	0.999997
PSEN2	0.0693029	0.559867	0.251915	0.988946	0.893967	0.0117143	1.93128	0.0641587	0.821083	0.477393	0.321124	0.951242
PSMA1	-0.0973803	0.064559	1.19004	0.457238	-0.869923	0.317983	0.497596	0.718704	-1.09248	0.128537	0.890973	0.394237
PSMA2	-0.364973	0.0257331	1.58951	0.222231	-1.63403	0.0236346	1.62645	0.0961853	-2.2622	0.0290053	1.53752	0.126385
PSMA3	-0.28154	0.0525457	1.27946	0.390842	-1.75337	0.059088	1.2285	0.197583	-2.10923	0.0322896	1.49094	0.129826
PSMA4	-0.411223	0.000436695	3.35982	0.008506	-2.29017	0.0010446	2.98105	0.010944	-1.97343	0.0126131	1.89918	0.0704793
PSMA5	-0.23633	0.0969153	1.01361	0.507008	-1.95953	0.0104635	1.98032	0.0527263	-1.81403	0.0372877	1.42843	0.15398
PSMA6	-0.771923	3.4936e-06	5.45673	0.000215333	-2.9671	3.6101e-05	4.44248	0.00285067	-3.17443	4.54177e-05	4.34278	0.00351667
PSMA7	-0.443007	0.0214243	1.66909	0.164763	-2.34233	0.0022371	2.65032	0.0162553	-2.5822	0.000457654	3.33946	0.00907133
PSMA8	0.140865	0.233001	0.632643	0.671693	0.75599	0.0347864	1.45859	0.139522	1.03346	0.29552	0.529413	0.816896
PSMB1	-0.431657	0.00322	2.49214	0.0461433	-2.2657	0.00690227	2.16101	0.039926	-2.45993	0.0132187	1.87881	0.0742253
PSMB10	-0.0389845	0.41338	0.383651	0.93716	0.726573	0.0209119	1.67961	0.101611	0.776123	0.294708	0.530609	0.657185
PSMB2	-0.449673	0.000520549	3.28354	0.009487	-1.7913	0.00298242	2.52543	0.0222297	-1.99993	0.0397167	1.40103	0.151958
PSMB3	-0.537163	0.000450693	3.34612	0.009694	-2.41013	0.00618246	2.20884	0.0343393	-2.45753	0.0295713	1.52913	0.110487
PSMB4	-0.726183	4.77463e-05	4.32106	0.00170067	-2.37713	0.000853593	3.06875	0.0103943	-3.0852	0.00183882	2.73546	0.02085
PSMB5	-0.70185	2.91137e-05	4.5359	0.00104733	-3.2904	0.00021544	3.66667	0.00570167	-2.7704	0.00427746	2.36881	0.0298327
PSMB6	-0.306213	0.0811695	1.09061	0.344446	-1.4534	0.0242401	1.61547	0.0961187	-1.30451	0.0783785	1.1058	0.248914
PSMB7	-0.395783	0.000986373	3.00596	0.015702	-2.98767	0.000639347	3.19426	0.00797467	-2.379	0.00657137	2.18234	0.0443803
PSMB8	0.120458	0.41806	0.378761	0.806635	0.68381	0.0282529	1.54894	0.12617	0.522717	0.658473	0.181462	0.999997
PSMB9	0.100107	0.256738	0.59051	0.822093	0.583813	0.165557	0.781052	0.443463	0.894227	0.257074	0.589941	0.70469
PSMC1	-0.45597	0.00027367	3.56277	0.00663967	-1.985	0.00422383	2.37429	0.0281257	-1.60383	0.0377057	1.42359	0.133477
PSMC2	-0.447657	0.00627814	2.20217	0.0601313	-1.72393	0.0113578	1.94471	0.0526143	-1.68087	0.00690453	2.16087	0.0450203
PSMC3	-0.213063	0.116536	0.93354	0.681039	-2.0023	0.0457097	1.33999	0.162232	-1.67323	0.0555397	1.2554	0.202572
PSMC4	-0.36709	0.044274	1.35385	0.321232	-1.60144	0.0387387	1.41186	0.143856	-1.92487	0.045521	1.34179	0.164906
PSMC5	-0.28133	0.0749196	1.1254	0.457682	-1.68623	0.0151425	1.8198	0.0721593	-1.4581	0.0817047	1.08775	0.264104
PSMC6	-0.296593	0.00789007	2.10292	0.093573	-1.4812	0.0060218	2.22027	0.0349287	-1.13399	0.0193676	1.71292	0.0927903
PSMD1	-0.39035	0.0543623	1.2647	0.368196	-1.10047	0.0790175	1.10228	0.243395	-1.08247	0.143242	0.84393	0.370601
PSMD10	0.0800173	0.419993	0.376758	0.93478	0.47679	0.310113	0.50848	0.771036	0.0964367	0.710977	0.148145	0.999997
PSMD11	-0.317733	0.0104636	1.98032	0.099188	-1.08552	0.0374997	1.42597	0.140148	-1.47427	0.0495317	1.30512	0.191312
PSMD12	-0.325647	0.0858688	1.06616	0.386939	-1.72697	0.0459427	1.33778	0.163621	-2.1587	0.0225374	1.6471	0.10117
PSMD13	-0.202793	0.125962	0.899762	0.699074	-1.70153	0.00708857	2.14944	0.040293	-1.54467	0.0452953	1.34395	0.176701
PSMD14	-0.69188	3.4936e-06	5.45673	0.000215333	-2.98843	3.14427e-05	4.50248	0.001994	-2.67177	0.000432032	3.36448	0.00875967
PSMD2	0.00655933	0.362663	0.440496	0.999978	-0.170897	0.60784	0.216211	0.999997	-0.415457	0.54716	0.261886	0.930523
PSMD3	-0.40867	0.00166646	2.7782	0.0258043	-2.16983	0.00132642	2.87732	0.0143227	-2.327	0.00119364	2.92313	0.0166937
PSMD4	-0.324087	0.0728095	1.13781	0.365969	-2.29023	0.00397229	2.40096	0.0253107	-1.7501	0.044373	1.35288	0.161771
PSMD5	0.133241	0.111697	0.951958	0.680264	0.952697	0.00112843	2.94752	0.0186797	1.14322	0.119551	0.922446	0.418173
PSMD6	-0.61997	5.82273e-06	5.23487	0.0003	-2.3671	0.000343543	3.46402	0.00634667	-2.40793	0.00892601	2.04934	0.054469
PSMD7	-0.163245	0.101197	0.994834	0.626269	-1.36394	0.06148	1.21127	0.19884	-1.31592	0.195468	0.708924	0.533154
PSMD8	-0.22902	0.0624883	1.2042	0.437998	-0.618547	0.337107	0.472233	0.701087	-0.967077	0.221213	0.655189	0.586106
PSMD9	0.045513	0.47453	0.323736	0.976297	0.727773	0.0787134	1.10395	0.241325	0.643447	0.36919	0.43275	0.912514
PSME1	0.17764	0.154719	0.810456	0.756263	0.819967	0.018692	1.72834	0.102203	0.884273	0.230166	0.63796	0.728057
PSME2	0.135287	0.367177	0.435125	0.954513	0.811607	0.0219507	1.65855	0.112724	0.644123	0.47439	0.323864	0.999997
PSME4	0.111376	0.196078	0.70757	0.774401	0.716053	0.0119191	1.92376	0.0682073	0.749963	0.332021	0.478834	0.846499
PSMF1	0.0416373	0.270369	0.568043	0.786731	0.67628	0.0412843	1.38421	0.168065	0.55937	0.600127	0.221757	0.999997
PSMG1	0.0153817	0.0787747	1.10361	0.658941	-0.80917	0.16164	0.791451	0.452042	-0.965217	0.302637	0.519078	0.657704
PSORS1C2	0.0266033	0.404193	0.393411	0.976657	0.759947	0.0301561	1.52063	0.121081	0.682413	0.393559	0.40499	0.696603
PTEN	0.29052	0.0107524	1.9685	0.311916	1.13853	0.000369164	3.43278	0.010033	3.30873	3.4936e-06	5.45673	0.000554667
PTH2	-0.074213	0.406201	0.391259	0.842266	0.313463	0.788857	0.103002	0.999997	0.258077	0.61607	0.21037	0.999997
PTK2	-0.00321433	0.843563	0.0738823	0.999978	0.465643	0.35195	0.453519	0.743567	-0.186687	0.354743	0.450086	0.835964
PTPN11	0.0577407	0.35937	0.444458	0.928294	-0.62008	0.295977	0.528743	0.736239	-2.1011	0.0125016	1.90303	0.075355
PTPN3	0.0468687	0.422463	0.374211	0.957669	0.798527	0.0345065	1.4621	0.138854	1.52847	0.000296958	3.5273	0.018327
PTTG1	0.26475	0.0745933	1.1273	0.551864	0.84407	0.00284033	2.54663	0.0301193	1.06526	0.0385897	1.41353	0.443039
PWP2	-0.175595	0.179688	0.745481	0.746311	-2.579	0.00222315	2.65303	0.0186653	-2.55797	0.00972968	2.0119	0.0555953
PYROXD1	0.0481387	0.4975	0.303207	0.969672	-1.32767	0.128338	0.891646	0.373667	-1.25631	0.0527783	1.27754	0.198953
PZP	0.221817	0.0504638	1.29702	0.576661	0.91862	0.00132176	2.87885	0.0153843	0.930707	0.206087	0.68595	0.925468
QARS	-0.35652	0.00307327	2.5124	0.0429983	-2.58307	0.000455334	3.34167	0.00744333	-2.50257	0.00532787	2.27345	0.0395363
R3HDM2	0.0711767	0.45997	0.33727	0.937637	0.634143	0.175009	0.756939	0.455827	0.9795	0.157885	0.801659	0.723416
RAB10	-0.0724958	0.424617	0.372003	0.999978	-0.536197	0.28387	0.546881	0.666516	0.41826	0.788463	0.103218	0.999997
RAD21	-0.100144	0.38721	0.412053	0.820936	-0.17629	0.676413	0.169788	0.999997	-0.189807	0.544717	0.263829	0.99093
RAD51	-0.140759	0.220394	0.6568	0.838991	-3.12343	0.000133923	3.87315	0.004421	-3.15157	4.54173e-05	4.34278	0.00386933
RAE1	-0.0410183	0.708097	0.149907	0.999978	-2.02077	0.00105856	2.97528	0.011879	-1.60367	0.0207885	1.68218	0.100534
RAF1	0.206433	0.0832025	1.07986	0.592349	0.9149	0.00597776	2.22346	0.0391773	0.401527	0.543977	0.26442	0.999997
RAN	-0.925223	3.4936e-06	5.45673	0.000215333	-3.81627	0.000331897	3.479	0.00693167	-2.9888	0.000613715	3.21203	0.009663
RANBP2	0.0468433	0.044601	1.35066	0.598757	-0.837696	0.371177	0.430419	0.704992	-0.44005	0.234593	0.629684	0.708237
RANGAP1	0.0100604	0.63398	0.197924	0.999978	-1.64873	0.0685947	1.16371	0.223755	-1.62057	0.067737	1.16917	0.241189
RARA	-0.0777362	0.501573	0.299666	0.999978	0.13831	0.90538	0.0431691	0.999997	0.258009	0.668247	0.175063	0.999997
RARB	0.0317477	0.390887	0.407949	0.929954	0.84066	0.00253291	2.59638	0.026047	0.843193	0.145028	0.838547	0.640628
RASSF1	0.0295356	0.269213	0.569903	0.875066	0.80289	0.0541664	1.26627	0.191321	0.628437	0.310187	0.508377	0.999997
RASSF5	0.127092	0.279598	0.553466	0.811349	0.807593	0.010857	1.96429	0.0604463	1.13777	0.0471399	1.32661	0.425071
RB1	0.256383	0.0712848	1.147	0.566127	1.17217	3.14427e-05	4.50248	0.00303133	1.2337	0.0651525	1.18607	0.433128
RBBP4	0.099837	0.454703	0.342272	0.972935	-1.53333	0.0065924	2.18096	0.0384247	-1.7972	0.00160126	2.79554	0.018585
RBBP4P1	0.199029	0.241479	0.61712	0.665784	0.762063	0.0278457	1.55524	0.125665	1.06356	0.164072	0.784966	0.738321
RBL1	0.155149	0.238144	0.62316	0.689271	1.05633	0.000385464	3.41402	0.0111747	1.17057	0.0757653	1.12053	0.567658
RBL2	0.113666	0.222018	0.653611	0.661298	0.880443	0.00197623	2.70416	0.0226537	1.12617	0.185227	0.732295	0.67644
RBM22	-0.39282	0.0255909	1.59192	0.211178	-2.09307	0.0228612	1.6409	0.0961177	-2.5927	0.0127902	1.89312	0.066349
RBM25	-0.342057	0.0751877	1.12385	0.328937	-1.8228	0.0356687	1.44771	0.135939	-1.76727	0.0390437	1.40845	0.162618
RBM33	0.015596	0.618393	0.208735	0.999978	0.463017	0.407173	0.390221	0.806638	0.77891	0.34812	0.458271	0.680294
RBM47	0.136469	0.140002	0.853866	0.685399	0.525993	0.185944	0.730618	0.500268	0.308783	0.514923	0.288257	0.987252
RBM8A	-0.626597	0.000399437	3.39855	0.00917067	-2.04737	0.0169289	1.77137	0.0705753	-2.27763	0.017339	1.76098	0.0832683
RBX1	0.0280253	0.332547	0.478147	0.915941	-2.15553	0.0473168	1.32498	0.161655	-1.388	0.140218	0.853197	0.409787
RCC1L	0.16413	0.202104	0.694424	0.809044	-0.74253	0.136094	0.866162	0.367392	-1.06095	0.158857	0.798995	0.460358
RCC2	0.2443	0.0684583	1.16457	0.651023	0.61527	0.136933	0.863493	0.400638	0.914503	0.36106	0.442421	0.962585
RELA	0.023714	0.426083	0.370505	0.92336	0.551073	0.338649	0.47025	0.593298	0.389377	0.774973	0.110713	0.999997
RETSAT	0.0491207	0.353413	0.451717	0.923206	0.763173	0.0335472	1.47434	0.123259	1.04727	0.103982	0.983043	0.568778
RFC2	0.0745603	0.594747	0.225668	0.950459	-1.57567	0.0387343	1.4119	0.144232	-1.3853	0.145496	0.83715	0.406928
RFC3	0.0873027	0.186342	0.72969	0.825917	-1.47443	0.152219	0.817532	0.42559	-1.11267	0.26243	0.580987	0.645888
RFC4	0.0204593	0.395473	0.402883	0.895666	-1.38207	0.0719707	1.14284	0.228588	-0.693473	0.11307	0.946653	0.485165
RFC5	0.10046	0.452443	0.344436	0.940113	-1.5304	0.058456	1.23317	0.166741	-1.33917	0.10051	0.99779	0.266344
RFT1	0.0561283	0.74263	0.129228	0.999978	-1.78287	0.00779887	2.10797	0.043503	-1.9538	0.064615	1.18967	0.191237
RFWD2	-0.208947	0.151846	0.818596	0.659953	-0.26372	0.813673	0.0895499	0.999997	1.34553	0.000618364	3.20876	0.0313873
RHOA	0.0738917	0.548347	0.260945	0.943663	0.244447	0.730117	0.136608	0.999997	-1.01646	0.0657993	1.18178	0.231485
RHOB	0.0714083	0.169928	0.769735	0.819567	0.868093	0.00120997	2.91723	0.0195443	1.00575	0.323237	0.490479	0.721086
RHOT2	0.0874227	0.122494	0.911886	0.742267	0.924573	0.0253651	1.59576	0.115101	1.18406	0.0596809	1.22416	0.377701
RIT1	-0.0645637	0.594637	0.225748	0.999978	-0.4801	0.49777	0.302971	0.831096	-4.31817	1.28101e-05	4.89245	0.001671
RIT1_M90I_noCDNA	0.0215983	0.60647	0.217191	0.999978	0.186963	0.664077	0.177782	0.999997	0.354582	0.16039	0.794822	0.447658
RNASEL	-0.00601667	0.403207	0.394472	0.869846	0.74682	0.0185619	1.73138	0.0940397	0.796707	0.110423	0.956939	0.722025
RNF7	0.1412	0.193046	0.714339	0.789827	1.0182	0.000227087	3.64381	0.0101653	1.5271	0.00616161	2.21031	0.114201
RNGTT	0.100753	0.24126	0.617515	0.847881	-1.45123	0.0458473	1.33869	0.158895	-1.51997	0.0869327	1.06082	0.285164
RNH1	0.191853	0.231292	0.635839	0.59254	0.509603	0.182695	0.738274	0.49242	0.7534	0.511801	0.290899	0.839516
RNPS1	-0.132433	0.384747	0.414825	0.911356	-0.44816	0.411102	0.38605	0.73074	-1.13851	0.153407	0.814156	0.450531
ROCK1	0.0353977	0.430013	0.366518	0.999854	0.769073	0.0089797	2.04674	0.0593733	0.863323	0.258729	0.587155	0.583824
RPA1	-0.613357	9.66563e-05	4.01477	0.002968	-1.66767	0.0378302	1.42216	0.132896	-2.13767	0.0437605	1.35892	0.163001
RPA2	-0.61768	4.07582e-05	4.38979	0.001466	-2.20727	0.0044055	2.356	0.0294453	-3.04983	0.0047851	2.32011	0.033941
RPA3	-0.208616	0.0880656	1.05519	0.546906	-2.08123	0.00306627	2.51339	0.0226167	-2.00567	0.010268	1.98852	0.0632607
RPA4	0.027573	0.29572	0.529119	0.882652	0.806837	0.000490277	3.30956	0.012673	1.03745	0.115417	0.937729	0.658616
RPAP1	0.133306	0.359547	0.444245	0.899846	-2.4665	0.00320833	2.49372	0.0236557	-2.1577	0.00274487	2.56148	0.0262773
RPAP2	0.00718667	0.427513	0.36905	0.924773	-0.597707	0.53111	0.274816	0.912495	0.0231483	0.547783	0.261391	0.86054
RPIA	0.0678817	0.298713	0.524745	0.911062	-0.749747	0.26842	0.571185	0.677917	-0.78221	0.154196	0.811926	0.55039
RPL10	-0.347883	0.0077687	2.10965	0.0924563	-2.67633	0.00170139	2.7692	0.014343	-2.53437	0.00631083	2.19991	0.0393257
RPL10A	-0.518033	0.00437997	2.35853	0.047822	-2.8849	0.00119599	2.92227	0.0121157	-2.75777	0.0065646	2.18279	0.0456583
RPL10L	0.0454826	0.338082	0.470978	0.860985	0.68789	0.164965	0.782608	0.440954	0.58082	0.394093	0.404401	0.959242
RPL10P16	0.0124367	0.31448	0.502407	0.964247	-0.301893	0.563553	0.249065	0.994884	-0.0452367	0.74337	0.128795	0.999997
RPL10P9	0.041202	0.42441	0.372214	0.964581	0.506223	0.309503	0.509335	0.774497	0.62915	0.459133	0.338061	0.904127
RPL11	-0.338467	0.0206299	1.6855	0.175959	-2.4852	0.000881553	3.05475	0.009617	-2.074	0.000595093	3.22541	0.011384
RPL12	-0.52521	3.14427e-05	4.50248	0.001359	-2.37647	0.006243	2.20461	0.035725	-1.82667	0.0102143	1.99079	0.059538
RPL12P2	0.0685293	0.30513	0.515515	0.918079	0.228863	0.293373	0.532579	0.737293	0.582513	0.3816	0.418392	0.924623
RPL13	-0.414547	0.0119705	1.92189	0.124444	-2.15517	0.00449863	2.34692	0.0288187	-1.9653	0.0289333	1.5386	0.11897
RPL13A	-0.42578	0.0156201	1.80632	0.140363	-3.16813	0.00780602	2.10757	0.039439	-2.2817	0.0054233	2.26574	0.0400317
RPL14	-0.316353	0.0145651	1.83669	0.147568	-2.3588	0.00963448	2.01617	0.0454863	-1.82393	0.0545436	1.26326	0.180345
RPL15	-0.570623	0.000627675	3.20227	0.010318	-2.76877	0.000494933	3.30545	0.008252	-2.69433	0.000837319	3.07711	0.01115
RPL15P17	0.0728597	0.689003	0.161779	0.999978	0.664393	0.110821	0.955378	0.338235	0.680417	0.23958	0.620549	0.848817
RPL17	-0.467623	0.000159542	3.79712	0.00397367	-2.7494	0.000350527	3.45528	0.00628933	-2.42123	0.00419124	2.37766	0.033459
RPL17P36	0.0378853	0.14155	0.84909	0.829458	0.338687	0.10566	0.976088	0.316483	0.406946	0.28033	0.55233	0.864111
RPL17P6	-0.289253	0.0973687	1.01158	0.478391	-1.59477	0.086938	1.06079	0.259174	-1.27967	0.159284	0.797828	0.555189
RPL18	-0.48817	0.00232792	2.63303	0.0319957	-4.06043	5.24039e-05	4.28064	0.00256467	-3.50477	9.43295e-05	4.02535	0.004262
RPL18A	-0.37323	0.0096834	2.01397	0.0992853	-2.81813	8.03547e-05	4.09499	0.00312367	-2.69463	0.00055084	3.25897	0.01035
RPL19	-0.465687	0.0013986	2.85431	0.0242217	-3.04847	0.000136253	3.86565	0.00408267	-2.84587	0.00304063	2.51704	0.0286293
RPL19P9	0.0163633	0.125618	0.900948	0.721383	0.775787	0.00980203	2.00868	0.0646467	0.921623	0.0250482	1.60122	0.317978
RPL21	-0.251313	0.0564653	1.24822	0.468696	-1.63613	0.0527657	1.27765	0.18427	-1.08693	0.121662	0.914845	0.355143
RPL21P119	-0.042868	0.411997	0.385106	0.989453	0.444077	0.333326	0.477131	0.701728	0.429337	0.526187	0.27886	0.892403
RPL21P134	0.0757253	0.191606	0.717592	0.832055	0.336533	0.253937	0.595275	0.667694	0.505913	0.369297	0.432625	0.975595
RPL21P16	-0.35513	0.0161208	1.79261	0.150414	-0.85887	0.0603993	1.21897	0.200784	-1.19741	0.177348	0.751173	0.483912
RPL21P29	0.0456408	0.349467	0.456594	0.965897	0.758997	0.0465177	1.33238	0.172718	0.858627	0.237667	0.624032	0.947825
RPL21P75	-0.293402	0.015897	1.79868	0.162374	-0.728067	0.13829	0.859208	0.385519	-0.60114	0.0643142	1.19169	0.215637
RPL22	0.11143	0.18105	0.742201	0.825248	0.486117	0.239873	0.620018	0.637213	0.567803	0.606883	0.216895	0.999997
RPL22L1	0.190783	0.0735867	1.1332	0.66252	0.727227	0.0149585	1.82511	0.071829	0.683273	0.0982787	1.00754	0.655372
RPL22P11	0.099108	0.43495	0.361561	0.908414	0.518027	0.20989	0.678009	0.406159	0.63736	0.39575	0.402579	0.896485
RPL23	-0.310877	0.0441703	1.35487	0.344122	-2.7327	0.0041353	2.38349	0.0277903	-2.26513	0.00880983	2.05503	0.0562167
RPL23A	-0.44214	0.0190114	1.72099	0.171744	-2.37767	0.0150332	1.82295	0.0638093	-2.3657	0.020665	1.68476	0.099529
RPL23AP2	-0.0593353	0.507543	0.294527	0.999978	0.110472	0.757013	0.120896	0.999997	0.31067	0.56866	0.245147	0.999997
RPL23AP42	-0.231783	0.0405392	1.39212	0.314991	-0.33881	0.122162	0.913063	0.349122	-0.545386	0.145486	0.837178	0.446096
RPL23AP63	0.173459	0.127192	0.89554	0.669535	0.788953	0.0663243	1.17833	0.233147	0.73983	0.44153	0.35504	0.959753
RPL24	-0.23716	0.211634	0.674415	0.76416	-2.00387	0.0026843	2.57117	0.020696	-1.9139	0.0178164	1.74918	0.0901053
RPL26	-0.404563	0.000497247	3.30343	0.00918467	-2.52443	0.000150227	3.82325	0.00408967	-2.73223	8.7341e-05	4.05878	0.00477767
RPL26L1	0.0630018	0.402996	0.394699	0.827995	0.673863	0.0971837	1.01241	0.262522	0.797333	0.272147	0.565197	0.999997
RPL26P22	0.168233	0.16478	0.783096	0.807264	0.457813	0.161575	0.791627	0.454878	0.53409	0.65629	0.182904	0.999997
RPL26P24	0.271137	0.0417177	1.37968	0.568196	0.817483	0.061317	1.21242	0.219954	0.782407	0.351022	0.454666	0.875986
RPL27	-0.544793	0.00024572	3.60956	0.00609133	-3.2217	0.000473961	3.32426	0.00702967	-2.8741	9.4331e-05	4.02535	0.00480867
RPL27A	-0.381233	0.00352507	2.45283	0.045167	-2.51997	0.000282984	3.54824	0.00619767	-2.75223	0.000441363	3.3552	0.009944
RPL28	-0.161387	0.324577	0.488683	0.817767	-2.32063	0.0027262	2.56444	0.0218303	-2.783	0.0027821	2.55563	0.0256267
RPL29	0.117533	0.319179	0.495966	0.839386	-0.0105463	0.620153	0.207501	0.999997	0.200083	0.723343	0.140656	0.999997
RPL3	-0.31401	0.0412099	1.385	0.317426	-2.02927	0.0117701	1.92922	0.0567843	-1.7006	0.0612517	1.21288	0.222176
RPL30	-0.32297	0.0279573	1.55351	0.236047	-2.19347	0.0080646	2.09342	0.043695	-2.08647	0.040623	1.39123	0.153423
RPL31	-0.449813	0.00166881	2.77759	0.0234243	-3.08353	1.97975e-05	4.70339	0.002221	-2.74353	0.000415735	3.38118	0.00939367
RPL31P17	-0.13247	0.44478	0.351855	0.999978	-0.290463	0.72637	0.138842	0.999997	0.0355823	0.81967	0.086361	0.999997
RPL31P31	0.13992	0.259058	0.586602	0.858824	0.696593	0.0035111	2.45456	0.0312287	0.70532	0.62457	0.204419	0.999997
RPL32	-0.39856	0.00526015	2.279	0.064391	-2.49	4.0759e-05	4.38978	0.00285067	-2.02663	0.00314311	2.50264	0.0265173
RPL34	-0.564057	6.40505e-05	4.19348	0.00202833	-3.2928	1.04809e-05	4.9796	0.00195967	-3.71827	0.000231746	3.63499	0.00601367
RPL34P27	-0.11372	0.693153	0.159171	0.999978	0.397257	0.41429	0.382696	0.88844	-0.000432	0.761323	0.118431	0.999997
RPL34P31	0.0573007	0.318137	0.497386	0.875909	0.657693	0.0631173	1.19985	0.224692	0.62745	0.388697	0.410389	0.963156
RPL35	-0.287937	0.0774633	1.1109	0.460153	-1.27364	0.138207	0.859471	0.365055	-0.452073	0.368487	0.433578	0.782097
RPL35A	-0.269123	0.0294735	1.53057	0.234835	-3.16273	0.00155233	2.80902	0.015387	-3.6244	0.000767429	3.11496	0.0123897
RPL36	-0.405473	0.0313928	1.50317	0.237531	-1.57683	0.0165822	1.78036	0.0734527	-1.93713	0.00835797	2.0779	0.054094
RPL36A	0.042036	0.55309	0.257204	0.927667	0.208349	0.44199	0.354588	0.911189	-0.00866333	0.579593	0.236877	0.999997
RPL36AL	-0.0124433	0.556743	0.254345	0.996202	0.0652887	0.85566	0.0676988	0.999997	0.259057	0.714507	0.145994	0.999997
RPL36P14	0.0907383	0.366003	0.436515	0.938002	0.697517	0.0595847	1.22487	0.220144	0.93286	0.0703017	1.15303	0.558407
RPL37	-0.189793	0.136734	0.864122	0.804202	-1.6204	0.0855397	1.06783	0.262502	-1.4998	0.0715013	1.14569	0.246649
RPL37A	-0.538277	0.0043892	2.35761	0.049461	-3.11167	0.000238733	3.62209	0.00550867	-3.91693	0.000248048	3.60546	0.00759567
RPL38	-0.297867	0.0671105	1.17321	0.380725	-1.9712	0.00291255	2.53573	0.0209257	-1.8495	0.00304761	2.51604	0.0282663
RPL39	-0.273007	0.048651	1.31291	0.364067	-2.7109	0.0023023	2.63784	0.0183467	-2.105	0.00521707	2.28257	0.0388837
RPL3L	0.0469233	0.232536	0.63351	0.778326	0.80353	0.0376648	1.42406	0.1501	0.7236	0.489797	0.309984	0.924024
RPL4	-0.342073	0.0190134	1.72094	0.174474	-2.99003	0.0003482	3.45817	0.006569	-2.22783	0.0167124	1.77696	0.0764127
RPL41	-0.0930683	0.263553	0.579131	0.98319	-0.83646	0.445757	0.350902	0.949192	-1.00673	0.33841	0.470557	0.721014
RPL5	-0.285543	0.0150495	1.82248	0.147881	-2.52723	0.000252706	3.59738	0.005581	-2.13877	0.0305891	1.51443	0.109354
RPL6	-0.631493	0.000646309	3.18956	0.01294	-2.63537	0.00065797	3.18179	0.010312	-2.94243	0.00108187	2.96582	0.0128853
RPL6P19	-0.0471198	0.39378	0.404746	0.909967	-0.176764	0.269634	0.569225	0.578749	-0.21455	0.350063	0.455853	0.918841
RPL7	-0.441193	0.00110516	2.95657	0.019798	-2.07893	0.0009072	3.0423	0.0120147	-2.24377	0.0134306	1.8719	0.065304
RPL7A	-0.28321	0.0808307	1.09242	0.505881	-1.88613	0.0110645	1.95607	0.0565877	-1.478	0.0758022	1.12032	0.246258
RPL7AP27	0.158017	0.157856	0.80174	0.714849	0.891603	0.029327	1.53273	0.134325	0.624087	0.107752	0.967575	0.665412
RPL7AP66	0.049286	0.0850753	1.0702	0.673445	0.60556	0.179303	0.746412	0.508218	0.853473	0.0528553	1.27691	0.451314
RPL8	-0.23695	0.0967297	1.01444	0.615313	-2.58363	0.000760437	3.11894	0.010709	-2.9075	0.00094213	3.02589	0.013347
RPL9	-0.188457	0.053517	1.27151	0.40068	-2.82877	0.0124362	1.90531	0.052184	-2.0156	0.0204602	1.68909	0.100986
RPLP0	-0.514597	7.33657e-05	4.13451	0.001778	-3.01847	3.14427e-05	4.50248	0.00271233	-2.4758	0.00091417	3.03897	0.014941
RPLP1	-0.22539	0.154384	0.811399	0.747771	-2.2133	0.00519504	2.28441	0.0317497	-1.62332	0.0793046	1.1007	0.236329
RPLP2	-0.218201	0.145892	0.835968	0.607562	-1.9425	0.022174	1.65416	0.0977347	-1.9971	0.0268697	1.57074	0.124003
RPN1	0.067501	0.550293	0.259406	0.999978	-1.01095	0.0882323	1.05437	0.267215	-1.20553	0.105894	0.975128	0.319917
RPN2	-0.005427	0.294057	0.531569	0.931081	-1.21827	0.041983	1.37693	0.152503	-1.2493	0.0248013	1.60553	0.111943
RPS10	-0.214743	0.158735	0.799327	0.635379	-1.36049	0.0264763	1.57714	0.110373	-1.26644	0.061121	1.21381	0.213422
RPS10P9	0.078408	0.431393	0.365127	0.938016	0.84189	0.00704203	2.1523	0.0496187	0.99506	0.274914	0.560803	0.680634
RPS11	-0.27766	0.0566697	1.24665	0.365962	-2.3186	0.00204612	2.68907	0.0167727	-2.4004	0.00185979	2.73054	0.020878
RPS12	-0.0787917	0.38649	0.412862	0.929837	-1.9017	0.0377277	1.42334	0.140998	-1.44587	0.100852	0.996317	0.319755
RPS12P22	-0.163213	0.11352	0.944929	0.658757	0.319928	0.457537	0.339574	0.766858	0.406923	0.257617	0.589026	0.768972
RPS12P4	-0.127222	0.319107	0.496064	0.958794	0.445367	0.143642	0.842719	0.396701	0.311547	0.391623	0.407131	0.828365
RPS13	-0.524073	0.000152557	3.81657	0.003426	-2.80727	0.000194478	3.71113	0.00521067	-2.71437	0.00205541	2.6871	0.0204677
RPS13P8	0.118339	0.261263	0.582922	0.876781	0.60209	0.09344	1.02947	0.310272	0.710653	0.157681	0.802222	0.763274
RPS14	-0.3541	0.0253834	1.59545	0.218889	-1.9872	0.000725513	3.13935	0.0101647	-2.39953	0.00362058	2.44122	0.029444
RPS15	-0.724447	0.000262025	3.58166	0.00585567	-3.8454	0.00119833	2.92142	0.011446	-3.8089	0.00322464	2.49152	0.022373
RPS15A	-0.288497	0.0893606	1.04885	0.543433	-2.37977	0.00105857	2.97528	0.0122773	-2.6466	0.0112857	1.94747	0.0570753
RPS15AP11	-0.138752	0.439703	0.356841	0.747479	0.321337	0.3859	0.413525	0.860284	0.0411395	0.737137	0.132452	0.999997
RPS15P5	0.0926982	0.131159	0.882202	0.751128	0.394843	0.43989	0.356656	0.848665	0.443023	0.587063	0.231315	0.986321
RPS16	-0.2145	0.139902	0.854177	0.633895	-2.02963	0.0030849	2.51076	0.0225327	-1.7403	0.0492849	1.30729	0.15482
RPS17	-0.35602	0.00792243	2.10114	0.0896077	-2.14147	0.00614547	2.21145	0.0362113	-2.73983	0.00349017	2.45715	0.0310927
RPS18	-0.287633	0.0666493	1.1762	0.426775	-3.17073	0.000378477	3.42196	0.00716633	-2.61657	0.0180073	1.74455	0.0694623
RPS18P10	0.0857163	0.166705	0.778052	0.661382	0.74307	0.0486211	1.31317	0.186546	0.993167	0.0817557	1.08748	0.592061
RPS18P5	0.0579463	0.45349	0.343432	0.992229	-0.340923	0.36502	0.437683	0.771032	-0.291697	0.42247	0.374204	0.975986
RPS19	-0.388527	0.00359032	2.44487	0.0417693	-2.71743	0.00142424	2.84642	0.014636	-2.9522	0.0007162	3.14497	0.0133007
RPS19P3	0.021463	0.396573	0.401676	0.881827	0.602473	0.172072	0.764291	0.46951	0.524607	0.338617	0.470292	0.962585
RPS2	-0.491047	0.00540232	2.26742	0.0535567	-2.3774	0.0283837	1.54693	0.115849	-1.7033	0.0431567	1.36495	0.170552
RPS20	-0.529757	5.47337e-05	4.26175	0.00172267	-3.1467	0.00011529	3.93821	0.00437367	-3.8324	5.93924e-05	4.22627	0.00279033
RPS21	-0.079517	0.491223	0.308721	0.999978	-1.2206	0.0585923	1.23216	0.181846	-1.17569	0.0772655	1.11201	0.22962
RPS23	-0.261437	0.133366	0.874956	0.416072	-2.39943	0.00097007	3.0132	0.0115523	-2.40673	0.000478628	3.32	0.0103217
RPS24	-0.287576	0.0549556	1.25999	0.354379	-2.49023	0.000259694	3.58554	0.00555467	-2.03563	0.0135566	1.86785	0.0618713
RPS25	-0.0374147	0.01242	1.90588	0.454108	-1.34398	0.15816	0.800903	0.455557	-1.66403	0.057618	1.23944	0.208593
RPS26	-0.315173	0.082997	1.08094	0.427524	-1.4956	0.0275288	1.56021	0.106469	-1.4479	0.118235	0.927254	0.369915
RPS26P10	0.0191651	0.508497	0.293712	0.881097	0.373483	0.378013	0.422493	0.778285	0.85466	0.451138	0.345691	0.687585
RPS26P20	-0.0987941	0.173413	0.760919	0.655172	-0.42238	0.565823	0.247319	0.980305	-0.16218	0.37934	0.420971	0.921526
RPS26P25	-0.366603	0.0138918	1.85724	0.144303	-1.1567	0.0214543	1.66848	0.0911543	-1.12576	0.0763304	1.1173	0.238424
RPS26P28	0.058118	0.166987	0.777318	0.815509	0.865103	0.0283532	1.5474	0.125411	0.884343	0.404116	0.393494	0.728057
RPS26P35	0.0317019	0.270682	0.56754	0.865477	0.473097	0.287303	0.541659	0.740004	0.461217	0.0658277	1.18159	0.470685
RPS26P50	-0.0668773	0.326833	0.485674	0.961103	0.060574	0.423543	0.373102	0.785193	0.598303	0.35339	0.451746	0.999997
RPS26P7	0.0801347	0.444573	0.352057	0.989229	-0.146609	0.7434	0.128777	0.999997	0.0976067	0.697107	0.156701	0.999997
RPS27	-0.26185	0.0182008	1.73991	0.161523	-2.7844	0.0010679	2.97147	0.0126063	-2.44207	0.00273553	2.56296	0.0249227
RPS27A	-0.20486	0.213923	0.669742	0.996479	-1.19928	0.145414	0.837394	0.403139	-0.657617	0.396257	0.402023	0.720664
RPS27AP11	0.100203	0.377943	0.422573	0.946871	0.218305	0.405097	0.392441	0.942836	0.488657	0.485387	0.313912	0.999997
RPS27L	0.0429833	0.420563	0.376169	0.976302	0.640173	0.110125	0.958113	0.347627	0.553507	0.48815	0.311447	0.947012
RPS28	-0.30317	0.0830607	1.0806	0.511305	-2.7182	0.000753469	3.12293	0.00909167	-3.97143	3.14429e-05	4.50248	0.002946
RPS28P4	-0.0956143	0.25187	0.598824	0.953577	0.34892	0.248553	0.60458	0.617896	0.394943	0.235878	0.627313	0.691891
RPS28P7	0.0838677	0.4481	0.348625	0.996202	0.131447	0.571683	0.242844	0.894742	-0.236213	0.572603	0.242146	0.999997
RPS28P9	0.0549417	0.557053	0.254103	0.951766	0.291543	0.658533	0.181422	0.960362	0.521987	0.7993	0.0972902	0.999997
RPS29	-0.475493	0.00214393	2.66879	0.0314167	-1.96503	0.00991133	2.00387	0.0502267	-2.2623	0.0288727	1.53951	0.124976
RPS29P3	-0.197871	0.261075	0.583234	0.720114	0.172874	0.527263	0.277972	0.999997	-0.00796	0.35404	0.450948	0.999997
RPS3	-0.220363	0.0988913	1.00484	0.599824	-1.74763	0.0541407	1.26648	0.182036	-1.48527	0.083265	1.07954	0.272053
RPS3A	-0.450917	0.0037091	2.43073	0.047067	-1.72223	0.00400253	2.39767	0.0268593	-2.07437	0.0119705	1.92189	0.067025
RPS4X	-0.4778	0.000441372	3.3552	0.00939267	-2.5653	0.000911837	3.04008	0.010971	-2.04477	0.00340865	2.46742	0.0302517
RPS4Y1	0.140333	0.38972	0.409247	0.920322	1.00751	0.000241063	3.61787	0.010501	0.82752	0.0856737	1.06715	0.561083
RPS5	-0.358193	0.0090868	2.04159	0.0961897	-2.14393	0.00835793	2.0779	0.046354	-2.2075	0.0097718	2.01003	0.0701727
RPS6	-0.54011	9.43291e-05	4.02535	0.00212967	-3.7089	0.000154886	3.80999	0.00493267	-3.3811	0.000101316	3.99432	0.004882
RPS7	-0.083716	0.168529	0.773326	0.883119	-0.914017	0.242085	0.616032	0.623279	-0.327508	0.428447	0.368103	0.752195
RPS8	-0.612263	9.66591e-05	4.01476	0.00253067	-3.351	3.4936e-06	5.45673	0.00130633	-3.79227	2.21264e-05	4.65509	0.002121
RPS8P10	-0.00109433	0.40036	0.397549	0.920342	-0.164656	0.374487	0.426564	0.733747	-0.443097	0.361633	0.441732	0.777173
RPS9	-0.47478	0.000483298	3.31579	0.00953067	-3.04073	0.000161874	3.79082	0.00412267	-2.69983	0.000657963	3.1818	0.011901
RPSA	-0.330697	0.0614689	1.21134	0.351907	-2.20453	0.0144089	1.84137	0.0694587	-2.07293	0.026434	1.57784	0.118889
RPSAP12	0.066015	0.35881	0.445135	0.960982	-0.116613	0.561923	0.250323	0.97725	-0.191254	0.667207	0.17574	0.999997
RPSAP9	0.0797117	0.392053	0.406655	0.920895	0.537043	0.248673	0.604371	0.616061	0.77696	0.298743	0.524703	0.699485
RRM1	-0.944787	3.4936e-06	5.45673	0.000215333	-2.81527	2.67847e-05	4.57211	0.00255233	-2.87803	0.00354139	2.45083	0.028713
RRM2	-1.10269	3.4936e-06	5.45673	0.000215333	-2.75223	0.0127252	1.89534	0.0625573	-2.92857	0.00367181	2.43512	0.0316667
RRP1	0.089803	0.313945	0.503146	0.832175	-0.99116	0.0897793	1.04682	0.268151	-0.910073	0.301871	0.520179	0.64855
RRP36	0.0657377	0.40646	0.390982	0.968189	-0.214431	0.43086	0.365664	0.83229	0.0322603	0.182497	0.738745	0.90528
RSL24D1	-0.344107	0.00702337	2.15345	0.0869207	-2.84847	0.00019681	3.70595	0.00514133	-3.82387	6.17209e-05	4.20957	0.00334467
RUVBL1	-0.136574	0.498287	0.302521	0.999978	-3.0479	0.000217773	3.662	0.00567767	-3.1211	0.000245719	3.60956	0.00781367
RXRA	-0.137265	0.382813	0.417013	0.966582	0.122329	0.79153	0.101533	0.999997	0.711217	0.1673	0.776503	0.796716
RXRB	0.175714	0.176667	0.752845	0.763195	0.646747	0.0171339	1.76614	0.0795037	0.7951	0.34816	0.458221	0.969843
RXRG	0.044874	0.63711	0.195786	0.999978	0.678907	0.0180494	1.74354	0.089485	0.847547	0.26706	0.573391	0.924024
SAE1	0.069266	0.26995	0.568717	0.909715	-1.5187	0.0342993	1.46471	0.131743	-2.2277	0.0209047	1.67976	0.103834
SAMD15	0.0948197	0.465155	0.332402	0.878798	0.832937	0.00374169	2.42693	0.0323973	0.698237	0.63855	0.194805	0.999997
SAT1	0.0952747	0.463003	0.334416	0.974989	0.90275	0.00693941	2.15868	0.0487817	0.981667	0.206405	0.68528	0.614209
SATB1	0.115865	0.239485	0.620722	0.808929	0.669803	0.132915	0.876425	0.388988	0.83975	0.48401	0.315146	0.912437
SBNO1	0.0321593	0.475857	0.322524	0.937637	-1.68827	0.0628237	1.20188	0.209548	-2.10827	0.0519837	1.28413	0.191448
SCAP	-0.098703	0.33844	0.470518	0.949235	-2.22573	0.0013404	2.87277	0.0133353	-2.08303	0.00161057	2.79302	0.018715
SCD	0.016844	0.452633	0.344253	0.946682	-1.31227	0.0138407	1.85884	0.0625297	-0.611227	0.461417	0.335907	0.959918
SCUBE3	-0.0793914	0.509903	0.292512	0.914578	0.278463	0.622827	0.205633	0.966634	0.477133	0.711443	0.14786	0.999997
SDAD1	-0.131146	0.195318	0.709258	0.725581	-2.24347	0.00692807	2.15939	0.039376	-1.91243	0.0126461	1.89804	0.0724093
SDCCAG8	0.26269	0.0340244	1.46821	0.517289	1.02397	0.00259344	2.58612	0.0254657	1.11971	0.0607206	1.21666	0.463516
SDE2	-0.39197	0.0047339	2.32478	0.0607903	-1.09429	0.123976	0.906662	0.358604	-0.777067	0.232437	0.633695	0.609674
SDHB	0.109961	0.61143	0.213653	0.999978	-1.29133	0.114956	0.93947	0.343003	-0.981283	0.129423	0.887987	0.387757
SDHC	0.120345	0.141567	0.849039	0.788007	-1.46567	0.0926607	1.0331	0.274299	-0.683073	0.254323	0.594614	0.654746
SDHD	0.15402	0.241153	0.617706	0.765163	-0.253907	0.501537	0.299697	0.891689	-0.16376	0.626263	0.203243	0.999997
SEBOX	0.030449	0.395336	0.403034	0.870953	0.833877	0.0049412	2.30617	0.0396987	0.748173	0.574167	0.240962	0.999997
SEC13	-0.0698977	0.525927	0.279075	0.965008	-1.88103	0.0023396	2.63086	0.0194673	-2.66253	0.00434726	2.36178	0.0319433
SEC16A	0.0896462	0.295952	0.528779	0.807148	0.458917	0.222817	0.652052	0.613215	0.752827	0.205628	0.686917	0.83653
SEC22B	-0.087605	0.3245	0.488785	0.891083	-1.66427	0.0521197	1.283	0.178268	-1.38213	0.0879593	1.05572	0.282197
SEC23B	0.0449787	0.192566	0.71542	0.800398	-0.18161	0.855157	0.0679543	0.999997	1.541	0.000119949	3.921	0.010327
SEC23IP	0.133386	0.445593	0.351061	0.917701	0.659863	0.016801	1.77466	0.0947357	1.44307	0.00163386	2.78679	0.0567817
SEH1L	-0.008629	0.526477	0.278621	0.999978	-0.657317	0.286444	0.542961	0.696077	-1.28414	0.196516	0.706603	0.403339
SETD1A	-0.0203493	0.569817	0.244265	0.948558	-0.613913	0.375943	0.424878	0.900241	-1.05616	0.115835	0.93616	0.356168
SF3B4	-0.180515	0.197895	0.703565	0.699603	-2.08277	0.0320613	1.49402	0.124815	-2.00567	0.00698855	2.15561	0.0430877
SF3B5	-0.401427	0.0067555	2.17034	0.082728	-2.17877	0.0111178	1.95398	0.0578973	-2.74083	0.0104005	1.98294	0.0587587
SFPQ	-0.110067	0.506913	0.295066	0.999978	-1.14653	0.0613103	1.21247	0.205697	-1.26048	0.154032	0.812388	0.429197
SGO1	-0.076295	0.380847	0.41925	0.999978	-0.45308	0.444253	0.352369	0.741425	-0.490546	0.520337	0.283716	0.937035
SGO2	0.127329	0.269452	0.569519	0.747097	0.477333	0.314127	0.502895	0.600745	0.492107	0.50218	0.299141	0.906146
SHOC2	0.127368	0.261635	0.582304	0.873973	0.74811	0.0680607	1.1671	0.239809	-0.507657	0.398327	0.399761	0.81151
SHQ1	0.0862283	0.452778	0.344115	0.866565	-1.34163	0.0192861	1.71476	0.0817143	-1.3714	0.0992648	1.0032	0.303181
SKA1	-0.0150949	0.182173	0.739515	0.775299	-0.0777333	0.760197	0.119074	0.999997	-0.075505	0.4158	0.381116	0.942027
SKA2	-0.23854	0.0824302	1.08391	0.521557	-1.88917	0.00286363	2.54308	0.0221113	-1.8922	0.0066554	2.17683	0.0472443
SKIV2L2	-0.232467	0.204854	0.688555	0.651083	-2.17707	0.000734813	3.13382	0.0101197	-3.08623	0.00032957	3.48205	0.00928667
SKP1	0.165484	0.281307	0.55082	0.79295	-1.21304	0.0622397	1.20593	0.208512	-1.18119	0.141257	0.849991	0.423278
SKP2	-0.0867634	0.37717	0.423463	0.972985	0.392973	0.316356	0.499824	0.671663	0.33237	0.474242	0.324	0.739385
SLC20A1	0.098419	0.372033	0.429418	0.969018	0.60941	0.0625385	1.20385	0.213244	0.48482	0.639353	0.194259	0.999997
SLC25A26	0.164484	0.258706	0.587193	0.716749	-0.700233	0.222834	0.652019	0.444014	-0.619023	0.393218	0.405367	0.723964
SLC35E1	0.234648	0.0270398	1.568	0.486588	0.50507	0.2082	0.681519	0.568321	0.81593	0.182865	0.73787	0.755614
SLC38A4	0.119643	0.249222	0.603414	0.746188	0.704187	0.0328251	1.48379	0.137391	0.92863	0.0647977	1.18844	0.541537
SLC38A7	-0.0960107	0.683937	0.164984	0.999978	0.572537	0.224243	0.649282	0.587526	0.446853	0.760647	0.118817	0.999997
SLC3A2	-0.052221	0.468797	0.329015	0.999978	-0.399214	0.477937	0.32063	0.913818	-0.472427	0.400773	0.397101	0.85283
SLC5A12	0.053016	0.301577	0.520602	0.90901	0.764657	0.0617512	1.20935	0.211074	0.707137	0.418617	0.378183	0.999997
SLC7A9	-0.0618771	0.53651	0.270422	0.999978	0.159429	0.714373	0.146075	0.999997	0.270308	0.57276	0.242027	0.999997
SMAD7	-0.0962708	0.31909	0.496087	0.938016	0.690373	0.175316	0.756178	0.476136	1.07437	0.128161	0.892245	0.693045
SMC1A	-0.0655583	0.667803	0.175351	0.999978	-1.7227	0.00495047	2.30535	0.030812	-1.7668	0.0377373	1.42323	0.153754
SMC2	-0.107517	0.348187	0.458188	0.954336	-1.85283	0.0107223	1.96971	0.055643	-1.18018	0.125184	0.902451	0.366696
SMC3	0.00572333	0.438117	0.35841	0.999978	-1.77203	0.0126832	1.89677	0.064091	-1.04223	0.077235	1.11219	0.258361
SMG1	-0.23314	0.184279	0.734524	0.434776	-1.15923	0.0973523	1.01165	0.299328	-0.795767	0.295613	0.529276	0.605717
SMG5	-0.00655013	0.262973	0.580088	0.941068	-0.86022	0.205482	0.687226	0.39371	-0.679867	0.369113	0.43284	0.735628
SMG6	-0.132091	0.218239	0.661068	0.738161	-0.228322	0.77603	0.110121	0.999997	0.227891	0.785253	0.10499	0.999997
SMG7	0.103493	0.44825	0.34848	0.948752	0.147272	0.728453	0.137598	0.999997	0.59871	0.217921	0.661702	0.811989
SMG8	-0.080506	0.56172	0.25048	0.999978	0.115496	0.832707	0.079508	0.999997	-0.286531	0.543063	0.26515	0.999997
SMG9	0.0219234	0.391073	0.407742	0.988862	0.100248	0.88751	0.0518267	0.999997	-0.07288	0.599027	0.222554	0.999997
SMN1	0.0841117	0.25303	0.596828	0.878138	-0.65745	0.3889	0.410162	0.759745	-0.762957	0.269389	0.56962	0.550047
SMN2	0.07146	0.250081	0.601919	0.821791	-1.06057	0.129935	0.886274	0.361581	-1.24413	0.147013	0.832645	0.396852
SMR3B	-0.0102086	0.448407	0.348328	0.972701	0.641997	0.162123	0.790155	0.43893	0.521757	0.695363	0.157788	0.999997
SMU1	-1.06489	3.4936e-06	5.45673	0.000215333	-2.998	2.44554e-05	4.61163	0.00196233	-3.3661	0.000732516	3.13518	0.0107633
SNAP23	-0.0730087	0.30478	0.516014	0.932167	-0.59811	0.329327	0.482373	0.791502	-0.51638	0.478197	0.320393	0.892496
SNAP29	-0.0239117	0.44845	0.348286	0.997154	0.58746	0.258953	0.58678	0.436176	0.538153	0.550787	0.259017	0.932747
SNAPC3	0.01886	0.2911	0.535958	0.890685	-1.6955	0.00730273	2.13651	0.040021	-1.7665	0.0399567	1.39841	0.150127
SNRNP70	-0.112661	0.188107	0.725595	0.639493	-1.13056	0.0371967	1.4295	0.135908	-1.15143	0.0395797	1.40253	0.164558
SNRPA1	-0.20936	0.0680223	1.16735	0.468215	-1.82083	0.00187141	2.72783	0.0168063	-1.39483	0.0015803	2.80126	0.0195483
SNRPB	-0.249318	0.0768843	1.11416	0.438138	-0.947147	0.22807	0.641932	0.575824	-1.09706	0.1922	0.716247	0.510951
SNRPD1	-0.638827	0.000101316	3.99432	0.002217	-2.77993	0.000301617	3.52054	0.00596567	-3.3231	0.000182834	3.73794	0.00633967
SNRPD2	-0.539297	0.0121335	1.91601	0.111862	-3.30297	0.00086526	3.06285	0.0110743	-3.19683	0.00144054	2.84147	0.0149297
SNRPD2P1	0.0311787	0.297687	0.526241	0.930479	0.351057	0.39917	0.398842	0.880129	0.674737	0.22537	0.647103	0.825993
SNRPD3	-0.574673	0.000366833	3.43553	0.00763667	-3.37413	9.4328e-05	4.02536	0.00381367	-3.28467	0.000625362	3.20387	0.0103403
SNRPE	-0.613263	0.000248049	3.60546	0.005756	-2.196	0.00684883	2.16438	0.0391573	-2.2644	0.00867703	2.06163	0.0460807
SNRPF	-0.53767	0.00117271	2.93081	0.020162	-2.8402	0.00056248	3.24989	0.008241	-3.25657	0.000667297	3.17568	0.012981
SNRPG	-0.57179	7.10373e-05	4.14851	0.00236633	-2.72433	0.0045569	2.34133	0.028185	-2.6156	0.00528365	2.27707	0.0348727
SNU13	-0.889883	3.4936e-06	5.45673	0.000215333	-2.50593	0.00348782	2.45745	0.024262	-2.83397	0.0140013	1.85383	0.066136
SNUPN	0.10939	0.368327	0.433766	0.742772	-1.17159	0.105603	0.976325	0.319159	-0.966903	0.311783	0.506147	0.774197
SOD1	0.215197	0.0724358	1.14005	0.585968	-2.63647	0.000175847	3.75487	0.00521167	-2.35767	0.000876899	3.05705	0.013964
SOD2	0.0298099	0.36615	0.436341	0.964122	0.0262378	0.935693	0.0288665	0.999997	-0.223863	0.827277	0.0823492	0.999997
SOS1	0.157804	0.156373	0.805839	0.762794	0.674907	0.0526181	1.27886	0.187905	-0.345697	0.291643	0.535148	0.888098
SOS2	0.182017	0.193457	0.713415	0.696085	0.973373	0.000364507	3.43829	0.0115017	1.06724	0.208197	0.681526	0.691784
SPC24	-0.252883	0.152237	0.817479	0.453996	-2.64207	0.00367648	2.43457	0.0239737	-2.5078	0.00671833	2.17274	0.0472443
SPC25	-0.217417	0.093622	1.02862	0.608078	-1.60191	0.136249	0.865666	0.358964	-1.76897	0.038543	1.41405	0.155661
SPDL1	-0.388053	0.00964827	2.01555	0.10193	-1.24766	0.114811	0.940017	0.343393	-0.993607	0.24147	0.617137	0.628628
SPEG	0.125024	0.311799	0.506125	0.758886	0.731253	0.0714077	1.14625	0.216774	0.646573	0.238612	0.622308	0.704206
SPRED2	0.120514	0.250607	0.601007	0.884452	0.860167	0.0018691	2.72837	0.024051	1.92057	3.4936e-06	5.45673	0.000554667
SPTAN1	0.135008	0.143831	0.842149	0.737257	0.80618	0.0239421	1.62084	0.0950587	1.78463	3.4936e-06	5.45673	0.000554667
SQSTM1	0.052825	0.470723	0.327234	0.974419	0.82378	0.0060779	2.21625	0.045657	1.14603	0.0195191	1.70954	0.29855
SRP14	0.136639	0.324058	0.489377	0.821791	-1.17463	0.143897	0.841947	0.407546	-1.16574	0.171973	0.764541	0.468353
SRP68	0.0986843	0.290197	0.537308	0.912989	-0.656723	0.39791	0.400215	0.943619	-0.814367	0.137736	0.860954	0.397262
SRSF1	-0.388827	0.000834983	3.07832	0.0153737	-2.17777	0.0025655	2.59083	0.02071	-2.5216	0.00391173	2.40763	0.0328367
SRSF7	-0.146387	0.420067	0.376682	0.999978	-1.84123	0.027969	1.55332	0.100815	-1.18013	0.0191626	1.71755	0.0958233
SS18L2	-0.0679037	0.626787	0.20288	0.999978	-2.8572	0.000257367	3.58945	0.00627033	-3.07083	0.00052986	3.27584	0.011518
SSBP1	0.0846117	0.305663	0.514757	0.869411	-0.608193	0.204802	0.688666	0.529414	-0.86339	0.218223	0.6611	0.628601
SSBP4	-0.0851513	0.383057	0.416737	0.838596	0.00480667	0.801887	0.095887	0.999997	0.21088	0.878593	0.0562121	0.999997
SSNA1	-0.00934133	0.610163	0.214554	0.999978	0.665513	0.0720193	1.14255	0.257174	0.806367	0.14327	0.843846	0.679887
STAG1	0.17757	0.137843	0.860614	0.722467	0.838353	0.00101433	2.99382	0.017974	0.669703	0.534247	0.272258	0.97095
STAG2	0.0643433	0.512327	0.290453	0.940663	0.118962	0.69345	0.158985	0.999997	0.609537	0.44687	0.349819	0.915855
STK4	0.0105587	0.480817	0.31802	0.996254	0.675247	0.0418655	1.37814	0.152779	0.893923	0.20662	0.684828	0.875611
SUCO	0.0871317	0.358723	0.44524	0.912569	-0.36123	0.585787	0.232261	0.999997	-0.48583	0.561937	0.250313	0.843932
SULT1E1	-0.0284287	0.192855	0.71477	0.868601	0.42394	0.350867	0.454858	0.733879	0.352667	0.719543	0.142943	0.999997
SUPT4H1	0.0737706	0.296892	0.527402	0.830747	-0.840453	0.136831	0.863814	0.376707	-0.184212	0.70579	0.151324	0.999997
TAF10	-0.0226503	0.579647	0.236837	0.997297	-0.799297	0.411107	0.386045	0.874867	-0.698027	0.35308	0.452127	0.677709
TAF6	-0.067149	0.237717	0.62394	0.912077	-1.2591	0.15001	0.82388	0.428864	-0.761413	0.337667	0.471512	0.621091
TAMM41	0.167798	0.209157	0.679527	0.737092	-1.1763	0.059517	1.22536	0.197987	-1.49353	0.0305288	1.51529	0.128537
TANGO6	0.0257297	0.20209	0.694455	0.842255	-1.95347	0.0055817	2.25323	0.0334337	-2.3772	0.0027192	2.56556	0.0252167
TAOK1	0.294257	0.00221846	2.65395	0.216643	1.04823	0.000192151	3.71636	0.00736567	1.58283	3.37719e-05	4.47144	0.00453067
TAP1	0.0870527	0.392877	0.405744	0.947695	0.574103	0.0537543	1.26959	0.203849	0.66139	0.495653	0.304822	0.932601
TBL1XR1	0.00800167	0.676223	0.16991	0.989453	0.911767	0.00415163	2.38178	0.03723	0.393343	0.638253	0.195007	0.999997
TEPSIN	0.109208	0.204511	0.689283	0.789067	0.757953	0.045817	1.33897	0.182493	0.81022	0.142349	0.846647	0.600757
TFDP1	-0.0579162	0.452753	0.344138	0.999978	-0.0729757	0.740197	0.130653	0.999997	-0.605917	0.39413	0.404361	0.925356
TGFA	0.160717	0.223764	0.65021	0.751527	0.885453	0.00323627	2.48996	0.0307723	1.10993	0.286616	0.5427	0.710158
TGFB2	0.21556	0.193133	0.714144	0.705917	0.79607	0.0186901	1.72839	0.0941533	0.913597	0.227297	0.643407	0.959753
TGFBR3	0.16002	0.11024	0.957661	0.633102	0.73716	0.0720057	1.14263	0.25117	0.71849	0.176573	0.753075	0.886628
TGS1	0.0675313	0.16082	0.79366	0.800515	-0.645843	0.39732	0.40086	0.615303	-0.163142	0.775937	0.110174	0.999997
THAP1	-0.0844927	0.562357	0.249988	0.999978	-1.4983	0.092742	1.03272	0.273941	-0.922327	0.245347	0.61022	0.614221
THAP12	-0.095497	0.4833	0.315783	0.999978	-0.760357	0.371127	0.430478	0.843918	-0.837783	0.34942	0.456652	0.734591
THG1L	0.0894337	0.144868	0.839027	0.741669	-0.78242	0.38512	0.414404	0.858807	-0.365497	0.660153	0.180355	0.999997
THOC1	-0.121924	0.446917	0.349773	0.999978	-0.787597	0.409117	0.388153	0.786745	-0.910103	0.24047	0.618939	0.618128
THOP1	-0.004562	0.245223	0.610438	0.933862	0.461527	0.294613	0.530748	0.734818	0.516593	0.43095	0.365573	0.926705
TIMM10	-0.00178633	0.64585	0.189868	0.999978	-2.1563	0.00434027	2.36248	0.028088	-2.41797	0.00684407	2.16469	0.0445717
TIMM44	-0.146493	0.315773	0.500625	0.89508	-0.681	0.296983	0.527268	0.736241	-0.249727	0.53382	0.272605	0.999997
TIMM9	0.20394	0.104999	0.978815	0.732723	-1.92223	0.0017573	2.75515	0.0165847	-1.8431	0.0031874	2.49656	0.0287693
TIMP1	-0.016711	0.412523	0.384551	0.999978	0.702407	0.0332447	1.47828	0.143827	0.675677	0.13621	0.86579	0.690977
TIMP2	0.0855673	0.46745	0.330265	0.909163	0.574087	0.08132	1.0898	0.260924	0.8111	0.289606	0.538192	0.771033
TIMP3	-0.0423893	0.592327	0.227439	0.992542	0.495217	0.227303	0.643394	0.613674	0.901357	0.205972	0.686193	0.630612
TINF2	0.107016	0.203713	0.690982	0.793745	-1.59737	0.100735	0.99682	0.307654	-1.81167	0.0469964	1.32794	0.172977
TIPIN	-0.081128	0.19134	0.718194	0.907392	-1.28752	0.140635	0.851906	0.387825	-0.37974	0.269298	0.569766	0.525314
TK2	0.0564395	0.485063	0.314202	0.97464	0.881753	0.0168824	1.77257	0.081861	0.918533	0.305514	0.514968	0.727012
TNF	0.15067	0.190153	0.720897	0.760387	0.495547	0.262393	0.581047	0.654311	0.718667	0.44506	0.351581	0.91375
TNFRSF12A	0.0446897	0.30645	0.51364	0.849768	0.65949	0.158647	0.799568	0.407605	0.644903	0.303037	0.518505	0.882483
TNFSF10	0.266907	0.0169336	1.77125	0.484583	0.98781	0.0017596	2.75459	0.022466	1.05617	0.249119	0.603593	0.651825
TNFSF13	0.083992	0.191243	0.718415	0.735762	0.781047	0.0528101	1.27728	0.187448	0.99533	0.299095	0.524191	0.862834
TNKS1BP1	0.114367	0.267835	0.572133	0.846297	0.732077	0.0626973	1.20275	0.209417	0.582293	0.39768	0.400466	0.996373
TNPO1	-0.0728754	0.388867	0.410199	0.952966	-0.884773	0.0842277	1.07455	0.257386	0.241947	0.631417	0.199684	0.999997
TOP2A	-0.327133	0.0493138	1.30703	0.338031	-2.49337	0.00144053	2.84148	0.014718	-1.94803	0.0471817	1.32623	0.156709
TP53	0.0814133	0.423443	0.373205	0.952937	0.58002	0.0214616	1.66834	0.0990873	0.349383	0.571543	0.242951	0.999997
TP53RK	0.0903407	0.406003	0.39147	0.949935	-1.44747	0.157581	0.802497	0.436026	-1.04628	0.14395	0.841787	0.398365
TPI1	0.0853853	0.220987	0.655634	0.848237	-2.64517	0.00125653	2.90083	0.01385	-1.78713	0.002286	2.64092	0.0241793
TPP2	0.120304	0.25639	0.591099	0.878961	0.720913	0.0054722	2.26184	0.0430353	0.880257	0.37952	0.420765	0.996373
TPR	-0.0648867	0.44097	0.355591	0.971531	-0.5265	0.53509	0.271573	0.999997	-1.36833	0.137428	0.861924	0.375584
TRA2A	0.029307	0.550997	0.258851	0.971823	0.6681	0.0729942	1.13671	0.230406	0.5123	0.412703	0.384362	0.96797
TRAPPC3	0.079297	0.337809	0.471328	0.842437	-1.47047	0.0183873	1.73548	0.0852943	-0.91918	0.1789	0.74739	0.500183
TRIAP1	0.20808	0.107821	0.967298	0.652309	-1.57283	0.0554538	1.25607	0.165303	-2.6032	0.011649	1.93371	0.0635207
TRIM49	-0.0349333	0.185263	0.732211	0.859666	-0.16424	0.48482	0.314419	0.956868	-0.276183	0.333133	0.477382	0.843171
TRMT112	-0.063486	0.545433	0.263258	0.972742	-2.7361	0.0015081	2.82157	0.0151837	-2.5155	0.00911259	2.04036	0.0541627
TRNT1	0.12142	0.26317	0.579764	0.874397	-2.1489	0.00386748	2.41257	0.0260553	-2.60207	0.00756824	2.121	0.0466393
TRPM7	-0.00794367	0.339527	0.469126	0.950856	-2.21833	0.0040304	2.39465	0.0263657	-1.6733	0.0286353	1.5431	0.132376
TSPO	0.068056	0.267567	0.572568	0.898308	0.486397	0.244453	0.611804	0.510899	0.733	0.379333	0.42098	0.890573
TTC27	0.18619	0.115989	0.935584	0.628417	-1.5073	0.0366729	1.43566	0.131829	-1.45124	0.133325	0.875089	0.372279
TTC7A	0.052518	0.554413	0.256166	0.961693	-0.849453	0.235123	0.628704	0.608898	-0.54272	0.559247	0.252397	0.967708
TTF2	-0.0384817	0.434623	0.361887	0.999978	-0.33403	0.710277	0.148572	0.999997	-0.49296	0.580493	0.236203	0.843623
TUBA1A	-0.183237	0.101214	0.994759	0.658285	-1.7166	0.087249	1.05924	0.271707	-1.84523	0.0948811	1.02282	0.296848
TUBA4A	0.0356371	0.693307	0.159075	0.999978	0.159483	0.64473	0.190622	0.999997	0.421167	0.57635	0.239314	0.998693
TUBB	-0.305313	0.0381425	1.41859	0.292721	-3.5237	0.000280655	3.55183	0.00578567	-2.69597	0.0018691	2.72837	0.0175907
TUBB4A	0.104508	0.337307	0.471975	0.835082	0.58332	0.123765	0.907401	0.373188	0.515057	0.549283	0.260204	0.963156
TUBB4B	-0.152133	0.281173	0.551026	0.885132	-0.94912	0.0960846	1.01735	0.25551	-0.515197	0.388583	0.410516	0.70262
TUBBP2	0.174319	0.158721	0.799366	0.684665	0.865637	0.0547211	1.26185	0.181621	0.84245	0.0885147	1.05298	0.624389
TUBG1	-0.00546633	0.51601	0.287342	0.999978	-2.2036	0.0186944	1.72829	0.0781827	-3.52237	0.00990911	2.00397	0.053238
TUBG2	0.013435	0.589947	0.229187	0.999978	0.175922	0.18298	0.737596	0.493005	0.324813	0.321083	0.493382	0.632178
TUBGCP2	0.011245	0.550023	0.259619	0.999978	-1.52123	0.0793133	1.10065	0.254173	-1.22657	0.0758269	1.12018	0.245888
TUBGCP3	0.0379711	0.614727	0.211318	0.999978	-0.952637	0.128545	0.890944	0.3637	-0.754327	0.405333	0.392188	0.848998
TUBGCP5	-0.00384633	0.59497	0.225505	0.999978	-0.621423	0.38391	0.415771	0.723874	-0.55553	0.541527	0.26638	0.865491
TUBGCP6	-0.0169483	0.572717	0.24206	0.999978	-0.40488	0.646717	0.189286	0.995916	-0.361733	0.59786	0.223401	0.957063
TUFM	0.0244217	0.59428	0.226009	0.999978	-0.9913	0.274327	0.561732	0.689638	-1.29721	0.111225	0.953796	0.31889
TWISTNB	-0.072529	0.301669	0.52047	0.874559	-0.55528	0.314657	0.502163	0.765084	-0.821077	0.276387	0.558483	0.694798
TWNK	-0.0943583	0.614047	0.211799	0.985644	-1.07136	0.0799253	1.09732	0.242609	-0.817283	0.263067	0.579934	0.63222
TXN	0.15992	0.126275	0.898681	0.744677	-1.20413	0.021552	1.66651	0.0874367	-1.38077	0.0264877	1.57696	0.124448
TXNIP	0.172303	0.332343	0.478413	0.917911	0.786117	0.0691402	1.16027	0.220956	1.08552	0.0814554	1.08908	0.52421
TYMS	0.0901223	0.376773	0.42392	0.917427	0.0315547	0.931203	0.0309555	0.999997	0.0482793	0.881457	0.054799	0.999997
U2AF1	-0.51279	0.000250377	3.60141	0.00566033	-3.00023	0.000669631	3.17416	0.00827467	-3.69287	0.000425067	3.37154	0.00808233
U2AF2	-0.296983	0.041778	1.37905	0.326758	-2.64973	0.0038116	2.41889	0.0253423	-3.35443	0.00153372	2.81425	0.0166667
UBA1	-0.286813	0.0852571	1.06927	0.430042	-3.3324	0.002286	2.64092	0.0188647	-3.6512	0.000946765	3.02376	0.0131147
UBA52	-0.297103	0.026632	1.5746	0.236778	-2.1453	0.0149142	1.8264	0.066476	-1.66093	0.0631593	1.19956	0.22422
UBE2C	0.00341067	0.577203	0.238671	0.951982	0.023727	0.885197	0.0529602	0.999997	0.012953	0.866017	0.0624737	0.999997
UBE2D1	0.163633	0.202593	0.693376	0.805356	0.494143	0.173454	0.760817	0.456948	0.497713	0.520587	0.283507	0.999997
UBE2E1	0.19983	0.063562	1.1968	0.53353	0.797287	0.0146093	1.83537	0.072017	0.914637	0.326659	0.485906	0.846499
UBE2L3	0.0502096	0.55576	0.255113	0.999978	-1.31645	0.0438767	1.35777	0.156294	-0.493113	0.392577	0.406076	0.804647
UBR4	-0.00180333	0.678027	0.168753	0.999978	-1.4474	0.0794147	1.1001	0.239722	-0.662537	0.3417	0.466355	0.752316
UGP2	0.117796	0.339133	0.46963	0.871725	-0.495927	0.487323	0.312183	0.948093	-0.998233	0.349721	0.456279	0.774436
UHRF1	0.0578227	0.331	0.480172	0.932626	-1.08836	0.12283	0.910696	0.349353	-1.23706	0.0564887	1.24804	0.208128
UMPS	0.0860747	0.235786	0.627481	0.786374	-1.96673	0.0245244	1.6104	0.0976047	-2.15313	0.0432383	1.36413	0.165355
UPF2	-0.0588334	0.44196	0.354617	0.971591	-1.15046	0.093172	1.03071	0.280755	-0.740913	0.360157	0.443509	0.862653
UPF3A	0.164543	0.073713	1.13246	0.644012	0.8399	0.061174	1.21343	0.210418	0.619367	0.210763	0.676205	0.834666
UPF3B	0.0620797	0.443667	0.352943	0.985948	0.24066	0.581467	0.235475	0.953256	0.578647	0.53299	0.273281	0.965994
UQCRFS1	0.0126637	0.584087	0.233523	0.999978	-0.874823	0.33755	0.471662	0.832628	-0.977553	0.21632	0.664903	0.568079
URM1	0.076996	0.162629	0.788802	0.749098	-1.76	0.00395597	2.40275	0.0264723	-1.6713	0.00765703	2.11594	0.0487297
UROS	0.091465	0.460727	0.336557	0.964826	0.280017	0.471703	0.326331	0.979668	0.748253	0.565803	0.247334	0.999997
USO1	0.0141403	0.452323	0.344551	0.968189	-1.36087	0.0163559	1.78632	0.0665397	-1.17267	0.109078	0.962262	0.331778
USP17L22	0.0004271	0.838853	0.076314	0.999978	0.0563463	0.864963	0.0630023	0.999997	0.0704603	0.914577	0.0387799	0.999997
USP7	0.022004	0.529327	0.276276	0.999978	-0.55107	0.44101	0.355552	0.999997	-0.902207	0.282223	0.549407	0.681609
USP9X	0.0801155	0.430273	0.366256	0.996001	0.055975	0.822733	0.0847409	0.999997	-1.1298	0.0433667	1.36284	0.158185
UTP15	0.012267	0.727893	0.137932	0.999978	-2.2922	0.00084661	3.07232	0.0102163	-2.04	0.00864904	2.06303	0.0549003
UXT	0.101434	0.397527	0.400634	0.952326	-1.93643	0.0271073	1.56691	0.106517	-1.55507	0.076624	1.11563	0.249234
VAPB	0.14616	0.157533	0.802628	0.812639	0.860377	0.00969247	2.01357	0.060809	0.83762	0.424377	0.372249	0.897051
VARS2	0.0566	0.255557	0.592513	0.872428	-1.62477	0.0626571	1.20303	0.204592	-1.75717	0.0662816	1.17861	0.213174
VCX3A	-0.0199452	0.463733	0.333732	0.971591	0.39323	0.498293	0.302515	0.940707	0.193823	0.5603	0.251579	0.999997
VDAC2	-0.000258767	0.61524	0.210955	0.999978	0.56984	0.163706	0.785935	0.4557	0.735563	0.22729	0.64342	0.838093
VENTX	0.123251	0.513933	0.289093	0.977834	0.773883	0.10003	0.99987	0.327156	0.83565	0.424	0.372634	0.812491
VHL	0.043715	0.132515	0.877735	0.724143	-1.58483	0.132919	0.876413	0.385048	-2.25807	0.0501383	1.29983	0.175441
VKORC1L1	0.116883	0.101155	0.995011	0.530805	0.968517	0.00301969	2.52004	0.0299307	0.635797	0.31477	0.502007	0.963618
VPS25	-0.0688917	0.492123	0.307926	0.999978	-2.4669	0.0024607	2.60894	0.0180717	-2.7886	0.00574242	2.24091	0.0355627
VPS35	0.0319843	0.00757553	2.12059	0.0900283	-0.144728	0.600153	0.221738	0.999997	-1.07004	0.169881	0.769856	0.465861
VPS45	0.232237	0.08462	1.07253	0.626922	-0.93683	0.17822	0.749044	0.436662	-0.864487	0.162647	0.788755	0.437172
VPS72	-0.0507343	0.619403	0.208026	0.999978	-0.49619	0.583653	0.233845	0.967003	-0.392408	0.634997	0.197229	0.987824
WASHC2A	0.017979	0.64724	0.188935	0.956244	0.0617133	0.596283	0.224547	0.955976	-0.000558	0.817793	0.0873564	0.999997
WDR1	-0.0470687	0.670597	0.173539	0.999978	-2.41287	0.00077674	3.10972	0.010128	-1.29377	0.056739	1.24612	0.197676
WDR12	0.010608	0.414077	0.382919	0.919977	-2.7648	6.17203e-05	4.20957	0.003259	-2.41753	0.000592753	3.22713	0.0110767
WDR55	0.0816487	0.3453	0.461803	0.875161	-2.36397	0.00244903	2.61101	0.0197833	-1.63303	0.034057	1.46779	0.146391
WDR74	-0.24708	0.171935	0.764635	0.569172	-2.3928	0.000744158	3.12834	0.00923567	-2.38163	0.0142015	1.84767	0.0706383
WDR75	-0.0518133	0.58542	0.232532	0.999978	-1.95347	0.000399439	3.39855	0.00659	-1.39777	0.0176302	1.75374	0.0885873
WDR77	-0.011178	0.720517	0.142356	0.999978	-1.74117	0.00839767	2.07584	0.045076	-1.98017	0.0170921	1.76721	0.08098
WEE1	-0.638963	0.000180508	3.7435	0.004238	-1.02875	0.230863	0.636645	0.59269	-1.5745	0.0507473	1.29459	0.195144
WSB1	0.0961207	0.201759	0.695167	0.789675	0.757057	0.0666511	1.17619	0.225069	0.52165	0.235386	0.62822	0.787965
XIAP	0.131002	0.336777	0.472658	0.871378	0.76507	0.0197638	1.70413	0.0972757	0.885433	0.439315	0.357224	0.741314
XPO1	-0.21761	0.14113	0.850382	0.735728	-2.28073	0.000793047	3.1007	0.009909	-2.73377	0.00279606	2.55345	0.0257727
XRCC5	-0.034506	0.276417	0.558436	0.909163	-1.48823	0.110335	0.957285	0.323455	-1.72427	0.065184	1.18586	0.226804
XRN1	0.105964	0.30941	0.509466	0.926527	-0.48081	0.503003	0.298429	0.853477	0.181594	0.796897	0.098598	0.999997
XRN2	0.0373583	0.509117	0.293183	0.999978	-1.83707	0.052897	1.27657	0.182485	-1.85	0.0203901	1.69058	0.0994823
YARS2	-0.0166529	0.598303	0.223079	0.996948	-1.69237	0.035483	1.44998	0.135232	-1.80127	0.0281366	1.55073	0.118916
YRDC	-0.278757	0.110584	0.956309	0.525105	-2.59007	0.00157331	2.80318	0.01577	-2.43333	0.00824602	2.08376	0.0517797
YTHDC1	-0.302086	0.0483005	1.31605	0.318002	-1.0643	0.117335	0.930572	0.345163	-1.18156	0.128309	0.891742	0.389155
YWHAB	0.2107	0.209761	0.678275	0.74719	0.777037	0.0652757	1.18525	0.231043	0.91405	0.0852963	1.06907	0.609593
YWHAE	-0.0230371	0.348873	0.457332	0.967189	0.24073	0.638133	0.195089	0.999053	0.434502	0.286743	0.542507	0.92487
YWHAG	-0.0947738	0.308681	0.510491	0.819645	0.639313	0.0588173	1.23049	0.184491	1.17763	0.0200314	1.69829	0.282371
YWHAZ	-0.0175697	0.255883	0.591958	0.910157	0.343113	0.507409	0.294642	0.763322	0.67789	0.636697	0.196067	0.999997
ZBTB17	0.083654	0.50399	0.297578	0.968916	-1.45357	0.120042	0.920666	0.340373	-1.11882	0.12488	0.903506	0.380795
ZBTB8OS	0.134285	0.3485	0.457797	0.855677	-1.01175	0.193503	0.713312	0.517474	-0.78221	0.21542	0.666714	0.564613
ZC3H18	0.171948	0.188171	0.725448	0.707544	-0.66116	0.32793	0.484219	0.79154	-0.534444	0.502833	0.298576	0.84433
ZCCHC14	-0.0334423	0.47442	0.323837	0.987593	0.503137	0.22814	0.641798	0.388029	-1.3345	0.0709497	1.14905	0.246748
ZCCHC3	-0.0866533	0.6366	0.196133	0.999978	0.72297	0.0305519	1.51496	0.129024	0.937243	0.233974	0.630832	0.72337
ZFP36	0.00465633	0.699377	0.155289	0.999978	0.447023	0.332051	0.478796	0.667788	0.679063	0.298865	0.524525	0.887401
ZFP36L1	-0.118814	0.381167	0.418885	0.941187	0.672713	0.148362	0.828676	0.372881	-0.0182743	0.52282	0.281648	0.999997
ZNF165	0.16401	0.171143	0.76664	0.820304	0.8303	0.0132	1.87943	0.0659247	0.95407	0.189202	0.723075	0.687777
ZNF207	-0.215936	0.141192	0.850189	0.528716	-0.939857	0.145189	0.838066	0.401844	-1.6059	0.059491	1.22555	0.216129
ZNF8	-0.0520647	0.202817	0.692896	0.885374	0.531837	0.116363	0.934184	0.367204	0.730857	0.720737	0.142223	0.999997
ZNHIT2	-0.0532047	0.699213	0.15539	0.994471	-2.15893	0.00817737	2.08739	0.0454113	-1.94587	0.0193606	1.71308	0.084628
ZP3	0.0369183	0.43089	0.365634	0.999978	0.665097	0.054297	1.26522	0.205058	0.711043	0.54663	0.262307	0.999997
ZW10	0.096804	0.382672	0.417173	0.874944	0.24323	0.492673	0.307441	0.972158	0.60194	0.67038	0.173679	0.999997
ZWILCH	0.139252	0.384537	0.415061	0.804704	0.32325	0.48971	0.310061	0.80231	0.59865	0.47755	0.320981	0.999997
ZWINT	0.079964	0.468473	0.329315	0.937502	-0.0893807	0.82587	0.0830883	0.999997	0.229513	0.85401	0.068537	0.999997

## Sheet: sgRNA barcodes
sgRNA Sequence	Target Gene Symbol
ACCCCACCTCCTCGGAACCA	AAAS
CCCAGGGTGAGACAGCACTT	AAAS
GGCCCATCGACAGAGTGCCA	AAAS
TGACAGCGCCCTGATAGAGT	AAAS
ACCTGCTGGCATTATACACA	AAAS
TCCTGTCCTACAACTGACAA	AAAS
CACTCACCAATTTGTGACTT	AAAS
AGATGCATCAACATTTGGTG	AAAS
AGGTGACCTCGCTATCGTCG	AAMP
TGGATGTGGAAAGTCCCGAA	AAMP
CGTATGGCGGCTCAGCGATG	AAMP
GGAGGTCTGGTCCTTTGAAG	AAMP
GGGAGGTGCTCTCACCATCA	AAMP
AGAACTTGATCCCGGTCCGC	AAMP
CTTGATCCTAACTGGCTCTG	AAMP
ACTCCACTCTAGTGGCCACA	AAMP
GTCCCCGAAGAAGTCGCACG	AARD
TCCCCGAAGAAGTCGCACGC	AARD
TGCTGGAGGACCTCAGACGA	AARD
CAGGAGCACGGACATCCAGG	AARD
GCAGAGAGAGAATTTCCCAG	AARD
GCAGAGCTGGACGGGCGTTG	AARD
CGGTGCAGCGCGCGATCTCG	AARD
AACCAAAGCTCCGCTCTACC	AARD
GATCCGAATGGACATAGACG	ABCA4
AGGGTGTTGAGTTGCCACAG	ABCA4
TGGAGTTAGGTCATCGACGT	ABCA4
TATGTCACCAAGAATTCAAG	ABCA4
GAAATAGATGACACCACTAC	ABCA4
AAAGACCGAGCCCCTAACAG	ABCA4
GCTCTGTCCAAATACGGCCA	ABCA4
ACTGGAACACGTTAGGAAGT	ABCA4
TGACACGAACGTGCTTGGGT	ACTR1A
AAAACCAGCTTTAATCACAC	ACTR1A
CGCTACAGGCAGGACCACAG	ACTR1A
TTTAAACCCACGAAAAAACC	ACTR1A
ATCATGCGCATCGACATCGC	ACTR1A
GCTTTCAATCCGCTATCCCA	ACTR1A
CTTGACAATCTCAAACTCAG	ACTR1A
CCTATCCATAAACCCCCAAA	ACTR1A
CCTCTTGCCAATCTCCCCGG	ADD1
ATTATCGAGCATCCGCATGA	ADD1
CCAAGTCGAAGACTAAGGTG	ADD1
GACTAGCAGATCTCTTTGGG	ADD1
GTAATGCCAATAGGCCTGTG	ADD1
CTGAAAACTGTGTCTGAGTG	ADD1
CTCCAACTGACACGAGCCCA	ADD1
TCATGTTGAAGTCCTGGCGA	ADD1
ACCGTCACAAGTCTCCGTCG	ADGRE5
TATGGCTCATTATGACGTGG	ADGRE5
GGCCTCACCTGTGTTCGAAG	ADGRE5
CCACCTTGAGTCCTCCGATG	ADGRE5
CTTGGAATGCAGGTTCAAGG	ADGRE5
GAGAGCGAGAACACCTGTCA	ADGRE5
CTCCAAGACAAGCTCAGCCG	ADGRE5
GAGGATCCGAAGGTCTGCAC	ADGRE5
ATGGACAAGCTAGACGCGGG	ADO
CGATGTTCAAGTCCTCGGCG	ADO
CTACATGCACATCTACGAGA	ADO
CGTCGCGATCGGAAGCGCCG	ADO
CCCGGGAGCGAGAAGCCGTG	ADO
ATCCCGCTGCACGACCACCC	ADO
TCAGCTTGCTCAGGTTCTCG	ADO
GATCCAACGGATCGCCCGCC	ADO
CAGCAACGTTCTGAACGCAT	ADSL
AAATGTGTGAAACCTAATGT	ADSL
TATGTTGGAGACAATACTGT	ADSL
GGTATAAATTCCGGACATGG	ADSL
CAGTGGTACCCTTTACTCCC	ADSL
TTGCACCGACATACGCCTCC	ADSL
GGAGAACATCGACTTCAAGA	ADSL
GCAGACATATACACGAAAAG	ADSL
GCAACTCAAATTCACCACCT	AES
CAAGCTCGAATGTGACAAGT	AES
CATCTCGATGTTCAAGCCGT	AES
CCTGCCCTACCTCTCCCAAG	AES
CGGATGATAGAGTTCAGCTC	AES
GAGATCGTCAAAAGGCTGAA	AES
AGGTCTTGGGAGCCATTGAG	AES
GCTGGGACAGCTGGTGGGCT	AES
ATCTCCACCTCTAAAAGCAA	AGAP4
GATGGGTGTGCAGGCCGATG	AGAP4
AGAGGTGGAGATGGGTGTGC	AGAP4
CCAGCTGACCAGCCAGAGCA	AGAP4
GACCAGCCAGAGCAAGGCCA	AGAP4
AGATCTATGAGGCAGGAGCT	AGAP4
GTGTGCAGGCCGATGTGGCT	AGAP4
GAGATCTATGAGGCAGGAGC	AGAP4
CCACCCAAAATGGATTCCTG	AHCTF1
CCTACATGCAGACTAGCAGG	AHCTF1
CCAAACATAGGTCAACAAGA	AHCTF1
GTTAATCCTTCGTCCAACAC	AHCTF1
GAATTCATGATTCTGAACGC	AHCTF1
CATGCCACCTGTCAGGTCCA	AHCTF1
CTGAACATCAACAAATCTTG	AHCTF1
AACATACCTATTGAAAGGTG	AHCTF1
GCTGGCCCGAGGCCGCAACG	AIFM3
TTTCCGAGCCTATGGCATCG	AIFM3
CAGCCCTCAGGATTGCGTGG	AIFM3
CGTGCACAGGACGATCCGGT	AIFM3
AGCACTTGGAGAGATACACT	AIFM3
GTGCGGACACTTATGGCCCA	AIFM3
TCTGCATGTAGAACTTCACC	AIFM3
TGTGTAGACTGTCCAGGCCA	AIFM3
TGAAGCCGCACTGTTAACTG	AKAP12
AAGCTGGAAGCCCTACCGAA	AKAP12
TCATATTCAGCTGATAACCG	AKAP12
GTGCTGTCCAAACCCCCCGA	AKAP12
TCAAGCCGAAACCTTAGCTG	AKAP12
AGAGATGGCTACTAAGTCAG	AKAP12
AAGAGAAGGTGTCACTCCCT	AKAP12
GCAAGAGAGGCGGACTCAAG	AKAP12
AATCATTATTAACCACAACA	AKAP9
TGAATACCTTGGCGGAACCG	AKAP9
CAACAGCAGTACGCAAACAC	AKAP9
ACTTCGAGAGCGCCTTCATG	AKAP9
ACATAAGTCCCTTAGTACAG	AKAP9
TGAGAGCACTGTTAGTGCAA	AKAP9
GTAGAGGACCGAAAACACTT	AKAP9
TTGTAAATTAGCAGTGAGCT	AKAP9
GAAGGTGCGTTCGATGACAG	AKT1
TGTCATGGAGTACGCCAACG	AKT1
TCACGTTGGTCCACATCCTG	AKT1
CTCACCCAGTGACAACTCAG	AKT1
CCTGCACTCGGAGAAGAACG	AKT1
CAGCCCTGCTTTACAGGACG	AKT1
GGGCAAGGGCACTTTCGGCA	AKT1
AGACTTCGGGCTGTGCAAGG	AKT1
CTGCAGGCAGCGTATGACAA	AKT2
GACCCCATGGACTACAAGTG	AKT2
CTCTTGAGTACTTGCACTCG	AKT2
CAAAGAGGGCATCAGTGACG	AKT2
GGGGGGTAGAGTCTGATCAG	AKT2
GTGATGGAGTATGCCAACGG	AKT2
CATGGCGTAGTAGCGGCCAG	AKT2
CTCACACAGTCACCGAGAGC	AKT2
CTGCACCATAGAAACGTGTG	AKT3
ATTTCATGTAGATACTCCAG	AKT3
GCCACTGAAAAGTTGTTGAG	AKT3
TATTTGAAACTACTAGGTAA	AKT3
ACAAATTGATAATATAGGAG	AKT3
GCCACAGAATGTCTTCATGG	AKT3
GAAAGAAGTCATTATTGCAA	AKT3
GTCTTCAAAAGGAAGTATCT	AKT3
GGACATGATGGATGGACGCG	ALAD
ATGGATTGCCTCAATAGCTG	ALAD
AGACTCACGTGACAAAGATG	ALAD
CACACAGGTATGGTGTGAAG	ALAD
GAACTCACCGCAGTGACCAT	ALAD
TAGCTCATCACCGATACCTA	ALAD
CCACCTCAGCCAGCCGCTGG	ALAD
TCCACCCACTACTTCGGGCC	ALAD
GTACCCCTCAGTCGTACACA	ALDH18A1
TGCCAATGGAACCCACCCAA	ALDH18A1
GCAGCTTTGGCTATCGCAAG	ALDH18A1
GGTAAACATAGCCTCATACA	ALDH18A1
CAGGCTGTTCAATTTGGATG	ALDH18A1
CATCATTTGTGTTGACAATG	ALDH18A1
CTTTGCATCATCTGAACCTG	ALDH18A1
TCTGAGACAGAAGGATCTCA	ALDH18A1
CTTCACTACAGAGAGCATGT	ALG11
GCAGCAGTCTGATTCCCCAA	ALG11
TTTAAGGAAACGCTATCTTG	ALG11
AGAAACCAGCAAATGTCCTG	ALG11
ACCGTTGACATTAACATCGC	ALG11
CATCCATACTGCAATGCTGG	ALG11
ATTGAATCAATGTAAACATC	ALG11
ATTCTCTCACTATGGAAAGT	ALG11
ATTTCCGGGACATAACCCCC	ALG13
TCGTTTATAACCACTACGAG	ALG13
CTGATTACATGGAGTATGCT	ALG13
TCCCAGTATGGATTTACCCC	ALG13
ATCCATCTCCGAGACAAGGT	ALG13
GGAAAAAAAGCGTGGCAAGA	ALG13
GCGATTAAATTGTTTCGAAG	ALG13
AGGCTTGTGTCTCATATATG	ALG13
TGGATGACCTAGTCCCCAAG	ALG2
TGTTCAGGCTGGCTAGACGG	ALG2
GGAGAGGGTTCATCTGATCG	ALG2
TGACATTTAGAGATGGATAG	ALG2
GGCCCCAATTGACTGGATAG	ALG2
CAGGAAAACCATGCGCACGT	ALG2
TGGACAGCGCACTACGACCC	ALG2
TGGGCGTGGGCGGCGCTGAG	ALG2
ATTATTAATTGGATGTGACG	ALG6
TCATAATCACCAAACATAGG	ALG6
CAAATAATCCACGATCAACC	ALG6
AAAATGCCAGTGACCCTAGG	ALG6
AAACTTACACATATGCACAT	ALG6
AAAAAGGCCTCAAAGGAAAG	ALG6
CAAAGGATTCAAATTTACAC	ALG6
TAGTCTATAAGAATAAGGCC	ALG6
ATCACCATTAGATACACCCG	ALMS1
TGAATGGTCTTCTCGACCAT	ALMS1
AGGTACTCATATACCTGAAG	ALMS1
AGTGATGCCTGACTTCAAGT	ALMS1
AAGAACAACTGACTTGTCCA	ALMS1
CTACTAGCTACTCAAATAGG	ALMS1
GGACAGCCATCTACCCGAAG	ALMS1
AGGTAGTCATCTAACTGAAG	ALMS1
GTCCCAGCTCCAGTTACGGT	ANAPC1
TCTGGAAAGGTGAAGTCACA	ANAPC1
AGGAATAGTGATCCTAACCA	ANAPC1
GATGAGACTCAACATTCTGG	ANAPC1
GTTGTCTGGATGACTAATGT	ANAPC1
ATGCTGAACATAGTAGGTAA	ANAPC1
GGTACTGCACTACGTTGACA	ANAPC1
TATCCATGACTACTTGACCA	ANAPC1
AGCAAGATCTCAGTCAGAGT	ANAPC10
TGGTGCTGACCCCAAGCAGT	ANAPC10
GGAACATGAATCCAGCCACT	ANAPC10
CTGACCCCAAGCAGTTGGAA	ANAPC10
GATGTTCACTAAATGAGGCT	ANAPC10
TCACAACCTTCAAGAAATTC	ANAPC10
TCACTCTCATCTTGCAAACC	ANAPC10
CTGGAACAGTACGGGAAATT	ANAPC10
GTGGCCAACGATGAGAACTG	ANAPC11
GATTAAGTGCTGGAACGGCG	ANAPC11
GAGCACTGGCCCCACACCAG	ANAPC11
GCAATGCATGTGGAAGCAGT	ANAPC11
GGAGGGGACACTCACAGTCA	ANAPC11
ACCAGCGGGCAGTCGTCGCC	ANAPC11
CGTGGCCACTTGGCTCTGGG	ANAPC11
ATCTGCAGGATGGCATTTAA	ANAPC11
GGAGCCGGTAGTACCGGCGA	ANAPC2
GGACGCGGGAGGACACAGTG	ANAPC2
GAAGTCCACACTATGTTGCG	ANAPC2
CTGACAGTGGATCGAGCGGG	ANAPC2
CTCTTCAGCATCGTCCGAGG	ANAPC2
CTCCCAATGCGAGAACTCTG	ANAPC2
GATGTCCGATGAACGCCGCT	ANAPC2
CAGGTGTCTTCCCGGACCAG	ANAPC2
GTCACAGAAGTCTCTACCAA	ANAPC4
ACATACTACCTTATTCAGCT	ANAPC4
CCTGCAGCATCTAGTCCAAG	ANAPC4
AACATGTATGTGTGAAGCAT	ANAPC4
AGTATGATGACTCTATAGAC	ANAPC4
TTTGAAGAAAGTCATACCAC	ANAPC4
CACTTCCATCCAATGCATAC	ANAPC4
AGGAGGTGACGTGTCTGGCA	ANAPC4
AAACTTACTAGTGACCGAAG	ANAPC5
CCACCTCGCAGAGCTACACG	ANAPC5
GCTGAAAGAAAGCTTACTGT	ANAPC5
AAAAGCTCTCTGTTGAACAA	ANAPC5
AGAATCAAACTGATGGCTGA	ANAPC5
GAGGCTGTATGGCCGCAGGT	ANAPC5
AAGAGGAGGTATCTTGCAGT	ANAPC5
AACTGAAAACATCTTGGACA	ANAPC5
TCATACCCAGAAACCACCCA	ANAPC7
GCTGGCAAACCTGTACAAGA	ANAPC7
ATCCTTATTGCGAGATAACG	ANAPC7
TGAATGTGATAGACCACGTG	ANAPC7
GAGCCAGTCCAAGTTAGGCA	ANAPC7
TGCTGTGAGTAAGTATACCA	ANAPC7
TACTTAAGGGAGCAGCACTT	ANAPC7
CTTCTAGGAATGGATGTATA	ANAPC7
GACCAGAGACACGACCCCGG	ANGPTL2
CTTACCCGACGGCTTGTCGG	ANGPTL2
TTACCTAAACAGGTACAAGC	ANGPTL2
TGACCCGCGAGTTCATGTTG	ANGPTL2
GGAGAACCGAGTGCATAAGC	ANGPTL2
AGAGATCATCGCGCAGCTTG	ANGPTL2
CTGGTCACTCTGGATCTCGT	ANGPTL2
GCTGGCCAGCTGCAGCATGT	ANGPTL2
CTTTCACACACTGATAGGTG	ANKH
ACCCGTGAAGAACTTCATGA	ANKH
AGGCCGACTGATTCTCTGTG	ANKH
GAGCACGAGCAACACAGTCA	ANKH
CAACATAGCCATCGACTTCG	ANKH
ATTTCCGTCAACCAGCCGTA	ANKH
CATTGCGTCCATGAAAGGAA	ANKH
GTGCGCCCATGTACAAGGAG	ANKH
CCGCAACTCACATATCTCGA	ANP32A
GGGTCCGAATGACTTACCAG	ANP32A
AAGCGATAACAGAGTCTCAG	ANP32A
TTCTTAAGTACAATCAACGT	ANP32A
TTGGCAAATGCTCACATCAG	ANP32A
CACTTAAATTTAGATGCGTG	ANP32A
TCGAATGAAGGCAAACTCGA	ANP32A
GCCCCTGACTCGGATGCTGA	ANP32A
AGAAATCAGAGACATTAACA	ANXA1
ACTGTGAAGTCATCCAAAGG	ANXA1
CCTTACAGGTCACCTTGAGG	ANXA1
AACCATTATGGCCTTATGCA	ANXA1
TCACACCAAAGTCCTCAGAT	ANXA1
GATCAAAGCAGCATATCTCC	ANXA1
TGACAGGCCTTGTATGAAGC	ANXA1
AAAATCTCCAGATGTGTCTG	ANXA1
CAAGTATCTCGAGACACCTG	APP
GCTGCAGCGAGACCTACCCG	APP
CTGCAGTTCAGGGTAGACCT	APP
ACATCCGCCGTAAAAGAATG	APP
CATGCCGTAGTCATGCAAGT	APP
CGGCCGGCTCACCTAAGCAG	APP
GCAGACACAGACTATGCAGA	APP
CTCTTCCACAGACTCTGTGG	APP
AGGTCCAAAAAACTTGACCA	AQR
CCCCTATTAGGAATAACATG	AQR
ATGGCACTAAGTTTGACCGG	AQR
ACGATTGCAAAAGAGTCTAG	AQR
CTGGATGAATTATTCTCCTG	AQR
GGTATTAAACCAGCGCCTTG	AQR
AGCTTATCTCCCTCCCAATG	AQR
CTGATTGTGTGGTACCTGAC	AQR
GTAGTGATGGAACCCCCCGG	ARAF
TGGTCTACCGACTCATCAAG	ARAF
AGTGTCCAGGATTTGTCCGG	ARAF
TCTGGCCCACAGAAGAACCT	ARAF
AGGGCGGTGGCATGGCGATG	ARAF
GGCTTCCGTTGCCAAACCTG	ARAF
CGTCCATATGGTCAGCACCA	ARAF
ATCATCACACAGTGGTGTGA	ARAF
ATTGTCGATGATTCAGTCAG	AREG
GAATCATCGACAATATAGCC	AREG
GAGGACGGTTCACTACTAGA	AREG
TGGTTCACGCTTCCCAGAGT	AREG
GTGCTGTCGCTCTTGATACT	AREG
TGAAGACATCTCACTTCTTG	AREG
ATGCAAATATATAGAGCACC	AREG
AAGAAAAAGGGAGGCAAAAA	AREG
TCTGTAAACTTTCTTACCAA	ARF4
ACCACAAAAATAAGACCCTG	ARF4
TGTTTCACAGTATGGGATGT	ARF4
TCTGCTTCTTGCCAAATAGT	ARF4
TCAATTCATCTACCAGAAGC	ARF4
CAACGATCGTGAAAGAATTC	ARF4
ATGTCTTCTTCTAGTTGGAT	ARF4
TAACTTCAGTTTATACAGAA	ARF4
CCTGGCGAGCCTCATCGATG	ARF6
CATTACTACACTGGGACCCA	ARF6
AAATGTCAAGTTCAACGTAT	ARF6
GAAACCCACAGTGGGAATGG	ARF6
GAAATGCGGATCCTCATGTT	ARF6
GGCCCAGCTTCAACTTGTAC	ARF6
TTATCAATGACCGGGAGATG	ARF6
AGTAATGCCGCCAGAGCGGC	ARF6
ACGAGAAGTTCTCCGAAGGG	ARGLU1
GGGAAAGTAAACGGAACCGG	ARGLU1
CATCGACATCTTCGGGCGCA	ARGLU1
AATAGAAGAAAAACTCATCG	ARGLU1
AGAAGAAAGCGGAGTTCGAG	ARGLU1
CCGGTCCCGGTCGCGATCCC	ARGLU1
CCACCAACACGGCCGTGTCC	ARGLU1
ATTGGTAGCAAAAAGGGTGG	ARGLU1
GTCATTGATGAATCGGAACT	ARHGEF11
CCATCCCTAGCGTATCTGTG	ARHGEF11
GCTGATAAACTTCTGCACAC	ARHGEF11
TCTGGTAGCCCTCTAAACGG	ARHGEF11
CCAACAGGTCAACGGCACCA	ARHGEF11
TCACGCTCAGAGATTCGCCT	ARHGEF11
TTAGAACGAAGCGCACACTG	ARHGEF11
GCGGGAGATTGACCGGCAAG	ARHGEF11
CATGTTCGAGATCCTCACGT	ARHGEF16
GCGGAACCAATCCTACCGGG	ARHGEF16
CCGGTAGCTCTTGACCACAA	ARHGEF16
GGACTTACATCCATCAGGAG	ARHGEF16
GGCGGCTGTACTTAGCAGGG	ARHGEF16
GCGCTGTTGGTAGACCTCGT	ARHGEF16
ATGTCCTGGGTGCCAGTCAG	ARHGEF16
TGGGCACAAGGGTTCCTTCA	ARHGEF16
GGATATCCACGTACCACCTG	ARHGEF18
AATCTACACGAGCTCCAAAG	ARHGEF18
AATGACTAACAGCTTCATTG	ARHGEF18
GGAGCGCATCATCCAGAACA	ARHGEF18
CCTCCACGGAATAGGCCTCG	ARHGEF18
TTGTAGCAGCAAAAGTACGT	ARHGEF18
AGGACTCAGCTTCAAACTCG	ARHGEF18
CCAGCAGGTCGTCAGCGCAT	ARHGEF18
GTTCCGCCAGTAGGACCGCA	ARL2
GATGTTGAAGCCCAGCGTTG	ARL2
CATCCTGAAGAAGTTCAATG	ARL2
AACTACTTTGAGAGCACCGA	ARL2
ATCAAGACCCTGGAGCACCG	ARL2
AAAGATGAGGAGGGTTGCTC	ARL2
CCCAGTGGCCTGGACAATGC	ARL2
GGCAGTCCTGCATGCGCTGG	ARL2
CCTCCCGTGTACTTACACGA	ARL8A
TACCGCGATCACGTTGACGA	ARL8A
GAGGACATGATCCCCACCGT	ARL8A
TCCCACATGCTGCGGAAACG	ARL8A
CAAGGCCCTATTCTGGAAGG	ARL8A
CTGGACAAACCTCAGCTGCA	ARL8A
TGCTGACCAGGAGAAGATTG	ARL8A
CTTGATAGTCACATTCCCTT	ARL8A
CCAGCAACTACGAGTATCTG	ARMC7
GGTCATAAGCGAAGTTGGCG	ARMC7
ACCAATAGCAAACTCCACCA	ARMC7
CTGCCTATCCAGCCCCAATG	ARMC7
AGGTGGACCCCCACGTCGGG	ARMC7
AAGGAGCACATCCTGCACGC	ARMC7
CTCATGCACCTGAGCCCGCC	ARMC7
TTCCAGGAGACCCAAAGCCA	ARMC7
GGGCTATTAAGCGGCGACCA	ARNT
CAAGCTAACCATCTTACGCA	ARNT
GGAACTCTAGCCAAGAACCA	ARNT
ACAGCAAACAGAATTGGACA	ARNT
TGGGGAACCTCACTTCGTGG	ARNT
AGATACCCTCAATGTTGTGT	ARNT
TGTCTCATGTGAGACAGGCA	ARNT
ACTTCAGAAAATGCCCTGAC	ARNT
ATTGTGGATAGAGCACCAAA	ASAH2B
AGTGTGTAATGATGCCTCCT	ASAH2B
AGCAAAACCTGAATACAGAG	ASAH2B
AATTCAGTACAAAACCAGGT	ASAH2B
CCTCACTGTGGAGAAATATG	ASAH2B
ATTAATTGTTTGAAAAAGGG	ASAH2B
TTATTGGCACAAGGGACTCC	ASAH2B
TCCACAATACTAGGAATTAA	ASAH2B
GCGACATCGCCATAATGACA	ATAD3C
CTGGCCGCTACATCGAGGCT	ATAD3C
TGAGGATTTACGGAAGCAGG	ATAD3C
TCTGCAGGAGAAGATAAGCG	ATAD3C
CCCTCCAGCAGGTCAGCCGG	ATAD3C
CCCGGTCTGTCACAAAGGCA	ATAD3C
TTGACTGGGCCAATACCAGC	ATAD3C
CTACGCCATCATGACAGGCG	ATAD3C
TGTCAGCGACAGACCCCTCG	ATF3
TCAAACACCAGTGACCCAGG	ATF3
GGCAGAAGCACTCACTTCCG	ATF3
CCAGCGCAGAGGACATCCGG	ATF3
TAACCTGACGCCCTTTGTCA	ATF3
AAAGTGCCGAAACAAGAAGA	ATF3
GTTGCTTGTCCCCCAGGAGT	ATF3
TAGCCCCTGAAGAAGATGAA	ATF3
CCAGTGATGAGATCGTACCA	ATP13A1
TCATACTATCAGAGCAACAG	ATP13A1
GAGCACCGTCCCATACCCGG	ATP13A1
CTCTAGAGGGTCACCCACGA	ATP13A1
CGGCTGCACGTCATCTTCGG	ATP13A1
CAGCTCAGGAGGCACGACCG	ATP13A1
GCACAGACCAATGCCCCGAG	ATP13A1
TCACGGCCGCGATGTAGCAG	ATP13A1
TGAGAAAATGAGCATAAATG	ATP1A1
TGGTATTGTTGTCTACACTG	ATP1A1
CCTGCCTCTTACCGTGACAG	ATP1A1
TTTGTCGGCAGCTCTTTGGG	ATP1A1
AGCACTTCGACATTTGCCCA	ATP1A1
TTTGATTGTCAAACCACATG	ATP1A1
TACCTAGGACTCGTTCTCCG	ATP1A1
GCTGTGCTGTGGTTCCGTGA	ATP1A1
GCTGGATCCTCCGAGAATCG	ATP2A2
TCATGTCTGTCATTCGAGAG	ATP2A2
GTTCAACTCGAGCAAAACAG	ATP2A2
AATGGGCAAAGTGTATCGAC	ATP2A2
AGATAACAGAAGTACAACCA	ATP2A2
ACGTGACAGAAAGTCAATGT	ATP2A2
TCATACTGGTGACAATTCAC	ATP2A2
AGGGTACAAACATTGCTGCT	ATP2A2
ATGAAAAAGCTGATATCAAG	ATP5F1C
CGCAAGCTGCCATACCATTG	ATP5F1C
ACCACACAGTCCTCGATCTG	ATP5F1C
CAAGTCTATGAAAATGGTAG	ATP5F1C
TGACGCATCTCCAAAAGTGG	ATP5F1C
CCCAATCCATATATTCGAGC	ATP5F1C
GGAATTGGTGACAAAATCAG	ATP5F1C
TGCTAAACAGATGAAAAGCG	ATP5F1C
ATTCACTGGGCTATTCAAGA	ATP5MC1
CAGATCCGCTGTTGTACCAG	ATP5MC1
CAGCAACTTCCCACTCCAGG	ATP5MC1
CCTGTTTAGATGAATTCACT	ATP5MC1
AATGTCCCGGGAGACAACAC	ATP5MC1
AGCCAAGTTTATTGGTGCTG	ATP5MC1
GCTGGCATTGGAACCGTGTT	ATP5MC1
TGAATTCATCTAAACAGGTA	ATP5MC1
GAGCATCTCGGGGATTACCA	ATP5MF
TTGCGTTTGCAGGTTACTAC	ATP5MF
ATGCGGGACTTCAGTCCTAG	ATP5MF
TTCCGTTTCAGTACCAGTGA	ATP5MF
CTCGGGGATTACCATGGTGC	ATP5MF
GACTCCAAAATGGCGTCAGT	ATP5MF
TCCCGCATCAAGATCCAGCT	ATP5MF
GCCAAGCTGGATCTTGATGC	ATP5MF
CAAGAGCGGTACCGGCATTG	ATP6V0C
TCGGCCGCCATGGTCTTCAG	ATP6V0C
TGATGCCAGCCATGACCACT	ATP6V0C
CATCGCCATCTACGGCCTGG	ATP6V0C
ACCCCAGTGCTCACTTGTAG	ATP6V0C
CGAAAAACGAAGCATACTCG	ATP6V0C
CTGGGCGCCGGCCTGAGCGT	ATP6V0C
ATGGACTTCATGATCTGCTC	ATP6V0C
TGCTGGGCTACCACACAATG	ATP6V1B2
CTCTGATACTCACTGAGGCG	ATP6V1B2
CCAAGCATATCCTCAGACAC	ATP6V1B2
TCTGGGTAGATTCGACATTG	ATP6V1B2
GTCCATTTGACCTTACCGGA	ATP6V1B2
GAAGAGGTACCTGGTCGACG	ATP6V1B2
TATTGTTATTTAGGTAAACA	ATP6V1B2
GCGAATTATCACTCCTCGCC	ATP6V1B2
CTTTAAACGAGCCTTCATGA	ATP6V1D
GAACTGACTGGTTTAGCCAG	ATP6V1D
CTGACTGGTTTAGCCAGAGG	ATP6V1D
CGTTTAAAGGGAGCACAGAC	ATP6V1D
CAAAGCAGTGGAACTACTGG	ATP6V1D
GATCCTAAAGAAGATAATAG	ATP6V1D
GCTGAAGCCAAGTTCACAGC	ATP6V1D
GCGAAGAAAGATAATGTAGC	ATP6V1D
AAGTTCTTTACCTTTACCAG	ATP6V1E1
CAGGAAACAAGATTTCCCTC	ATP6V1E1
CTGCAACGAACAATCATTCG	ATP6V1E1
AGTTCAACATAGAGAAAGGT	ATP6V1E1
TAAGGTCATCTCTTGCTCTG	ATP6V1E1
AGCAAAACAGAGACTCAGCA	ATP6V1E1
AGGTACCAAGTGCTGCTGGA	ATP6V1E1
CTTATAGATAAAGCATATGA	ATP6V1E1
TGAAAACAGGAAAGAACCGG	ATP6V1G1
CTCCAGGCATTGGGATCCCG	ATP6V1G1
TGAACAGTACCGCCTGCAGA	ATP6V1G1
GGCAGCCGAGAAGGTGTCCG	ATP6V1G1
TTGCAGCACTGAAGTGGAGA	ATP6V1G1
GCAGGCCAAAGAAGAAGCTC	ATP6V1G1
GGAGAAAGAATTCAAGGCCA	ATP6V1G1
CTTCTCGGCTGCCCGCTTCT	ATP6V1G1
TGACGTGCGAAAACAAGATG	ATR
CTGTGTGAGATGGTCAAGCA	ATR
AGTCAATTAGATGAACACAT	ATR
AGAACCTATTATCTCACAGT	ATR
TAATTATAGAATTAAACATG	ATR
TAGAAGATTAGCGGCAAATG	ATR
CAGGTGATATGATATCTCTC	ATR
ATACCTAGTCCAGTAAAACT	ATR
CTTCGAATGACAGTAAGACA	AURKA
TGAACCTGAAAACTCACCGA	AURKA
TGCTTGCAAAGGAATGCGCT	AURKA
TGAGTCACGAGAACACGTTT	AURKA
CCATATAGAAAATAATCCTG	AURKA
CCAAACTTTCCTTTACCCAG	AURKA
AGTGGCCTGGAGACAGGATG	AURKA
ATTCTGGAATATGCACCACT	AURKA
ATTCTAGAGTATGCCCCCCG	AURKB
TCTTTCCGGAGGACTCGCTG	AURKB
ATGCTCTAATGTACTGCCAT	AURKB
AGGTGATGGAGAATAGCAGT	AURKB
CATCAACCCATACTGCAGGT	AURKB
GAAGAAAAGCCATTTCATCG	AURKB
AATCTGCTCTTAGGGCTCAA	AURKB
CCAAACTTGCCTTTGCCCAG	AURKB
GCAGTTCTGGAAGTAGCACG	AVP
GTCGTTGCAGCAAACGCCGA	AVP
TACCTGTCTCAGCTCCAGGT	AVP
CGGGCCCAGCATCTGCTGCG	AVP
CAGTAGGCCGAGGAAGCAGG	AVP
TGAGGCGCTGCGCTGCCAGG	AVP
AGCAGCGGCCTTTGCCCCCG	AVP
GCCCTGCCAGTCCGGCCAGA	AVP
GACAGCCGACCGCTACATCG	AVPR1A
ACCGAGGGACGTGCGCAACG	AVPR1A
TGCATGCGGGACGTCTTGCG	AVPR1A
ACATCTGGTGCAACGTCCGC	AVPR1A
GCCTACGTGACCTGGATGAC	AVPR1A
ATGGAGAAGACGAAGTACTG	AVPR1A
GGTGCTGCCGCAAATGTGCT	AVPR1A
TGCTGACACAGGGTGCGAGC	AVPR1A
CAACGCAGGGAACCAAACGG	B3GNT2
ACCTGACCTGAGGGTCACGT	B3GNT2
CTATAAGCAGTGAATAATTG	B3GNT2
CAAGTAATTCAGGATGTGAT	B3GNT2
GGTTCCAGTATGCCTCGGGA	B3GNT2
TCTGGCAAAATGTGGAGTGA	B3GNT2
AGCATGCTGACCAACCAGAC	B3GNT2
CAAATTTCAGCATATCTGAA	B3GNT2
GGGCAGATCATAGGGGCCAG	B9D2
GCGGGAGGGCCAAACGCAAG	B9D2
GCCACCAAAGGTCTTCAAGG	B9D2
AAAATCCATAGCCTGCAAGC	B9D2
TGCAAGTGGGGCATTCACAC	B9D2
TGGCGAAGTGCAGGTCGATG	B9D2
ACCAGCTGGCCTGCCCCACG	B9D2
TGCCATGTGCCCAGTAGCCC	B9D2
GCCACAGCTCCTACCCCGCG	BAD
GGTGACTGGCGTCCCACAGG	BAD
TGGGGTACTTACCTCCATGA	BAD
GAGGAGCCCAGCCCCTTTCG	BAD
CATAGCGCTGTGCTGCCCAG	BAD
AGAGTTTGAGCCGAGTGAGC	BAD
TGATGCTTGCCGGAGCCTGA	BAD
AGCTCTGCAGAGAGGGGCCT	BAD
TCGGAAAAAGACCTCTCGGG	BAX
GTTTCATCCAGGATCGAGCA	BAX
CGAGTGTCTCAAGCGCATCG	BAX
AGTAGAAAAGGGCGACAACC	BAX
AGCAAACTGGTGCTCAAGGT	BAX
TTCTTGGTGGACGCATCCTG	BAX
ATGATCTGCTCAGAGCTGGT	BAX
ACAGTAACATGGAGCTGCAG	BAX
ACAGAGAATTACCGCCACCT	BBS12
AAACAGTATTAGATAGCATG	BBS12
ATAGGACAGATAATACTGAA	BBS12
ATGTATAAACAGTAAGCGGT	BBS12
GATTTGATAGAGGAATTGCA	BBS12
GACACAACAGTGATATATCC	BBS12
TTTGGATTTAACCAGTGCAG	BBS12
ATAGTATCAGTAATGTCAGA	BBS12
ATACTTCCGAATTTCGCGCA	BCAP31
GAACCTCCAGAACAATCCCG	BCAP31
AGCAATGTAGAGATTCCTCT	BCAP31
TGCCACCTTCCTCTATGCGG	BCAP31
GCTGCGAAATGAGAGTCACC	BCAP31
TGAAGCCTTTAAAAAGCAGG	BCAP31
CACTAACAACTCCACCAGCC	BCAP31
GGAGAATGACCAGCTCAAGA	BCAP31
TCGCCGAATAGATTCAACAA	BCL10
CTCGCCGAATAGATTCAACA	BCL10
TTCTGGATGGTACATGACAG	BCL10
ATAAAACTAGAACATCTGAA	BCL10
CGTCCTTCTTCACTTCAGTG	BCL10
CATCTGAATTTGATCTGGAG	BCL10
GTCGAACATCAAGTAGAAAA	BCL10
CATCTGTAATCTTCTGTATC	BCL10
CAGGCGACGAGTTTGAACTG	BCL2L1
GACCCCAGTTTACCCCATCC	BCL2L1
CCCAGCTCCACATCACCCCA	BCL2L1
TTTCCCAGAAAGGATACAGC	BCL2L1
CTTGCTTTACTGCTGCCATG	BCL2L1
GCCAGTGGCTCCATTCACCG	BCL2L1
CTCCGATTCAGTCCCTTCTG	BCL2L1
GAGACCCCCAGTGCCATCAA	BCL2L1
TGACGCTCGTGACCTTCGCA	BCL2L10
GTGAATCTGCCGTAACCTGG	BCL2L10
TGTTGCTGGCCGACTACCTG	BCL2L10
CCCTCCTGCTCCTTTAGCCG	BCL2L10
CCAGCTCGAAGCGGTTCCCG	BCL2L10
CCACCATGGCCGACCCGCTG	BCL2L10
TCCGTGCTCTCCGACAGCCC	BCL2L10
GGAACCCGGCACCCCCGAGC	BCL2L10
AGGTAGACAATTGCAGCCTG	BCL2L11
GTTCTGATGCAGCTTCCATG	BCL2L11
GTTGATTTGTCACAACTCAT	BCL2L11
TACCCATTGCACTGAGATAG	BCL2L11
TTGCCTTCAGGATTACCTTG	BCL2L11
CTTGGGCGATCCATATCTCT	BCL2L11
TAGTGGTTGAAGGCCTGGCA	BCL2L11
CTCTGTCTGTAGGGAGGTAG	BCL2L11
ACTTTGTAGGTTATAAGCTG	BCL2L2
GTGTGCTGAGAGTGTCAACA	BCL2L2
AAAAAGTTCATCGGAGACCT	BCL2L2
AGACAAAGAAGGCTACAAGG	BCL2L2
CCAGATCAGAGAAGGTGCGC	BCL2L2
TGGTGGGACAAGTGCAGGAG	BCL2L2
ACCCGCTGCACCAAGCCATG	BCL2L2
GCTCAGCTGCATGTGACCCC	BCL2L2
GCAATCCTCAAAACTCCGGG	BCR
CAAATGGTACATTCCGCTCA	BCR
GGGCGCTGTGACTTACATGG	BCR
GTCGAGTTTCACCACGAGCG	BCR
TGAGCTCTACGAGATCCACA	BCR
TGGCCTCGGACACGACAACC	BCR
AGCTATGACCGGCAGCGATG	BCR
CAGGAAGCGGGGGTTCAACT	BCR
GGTACGAAGTCTCGACACTG	BCS1L
AGATGATAGACTTGCAGACG	BCS1L
CAGAATTCAGTGGTCGCCGG	BCS1L
ACGTCTGTAAGGAATGCCTA	BCS1L
CATAGCTCCTGTCTCGAGCA	BCS1L
GCAAGGCTAGCTCTCGAGCT	BCS1L
GGTTGAGTCGGTCATCAGAG	BCS1L
ACCAGATAAAATGGTTTCCA	BCS1L
AGTTATTGATGACGCCCAAG	BECN2
GTCGGTGCATTCTTCACACA	BECN2
GGCGATGGCAGTGTGTCCAA	BECN2
CAGGAACAATGCAAGAGCAG	BECN2
GAACCAGCTGCAGTATGCCA	BECN2
GCAGGAGAGGCAGCACTACA	BECN2
GGAGCCCGGCGTCACCACCA	BECN2
CCCCGGTCTCCAGGCAGCGT	BECN2
GCCATTCATGATGAACGATG	BGN
AGCACTGAACCACCCGCAGG	BGN
CCTCCCAGCTCCTTACGTAG	BGN
AAGCTGACTGGCATCCCCAA	BGN
CCACGACAACCGCATCCGCA	BGN
AGAAGGCCTTCAGCCCACTG	BGN
CAAAGCCACTGTTCTCCAGT	BGN
GTTCTGCAGGTCCAGCAGCG	BGN
CTGGAACCGTTGTTGACCTG	BID
ACTGTGAACCAGGAGTGAGT	BID
ATGGACCGTAGCATCCCTCC	BID
ACATCATCCGGAATATTGCC	BID
CCAGTGCGTCCAGCTCTCTG	BID
CTGCCTCTATTCTTCCCAAG	BID
TGAGTGCATCACAAACCTAC	BID
CTCATCGTAGCCCTCCCACT	BID
TTTCATCTACGACCAGACTG	BIK
CCAAGAACCTCCATGGTCGG	BIK
GCAGTGACGCATTGGCCCTG	BIK
ATGCCAAGAACCTCCATGGT	BIK
CCAGGAGCTGCTCATACAGG	BIK
AAAGAATCGAAGTCCTCCAT	BIK
CGAGATGGACGTGAGCCTCA	BIK
ATAGGCCGGCTACCTGTGCA	BIK
ACCCGGAAGTAATGAGTGTG	BIRC3
TTTCGTTATTCATTGCACAG	BIRC3
CATGGGTTCAACATGCCAAG	BIRC3
AGGATTAACTAGAACACTAG	BIRC3
ATTGAGCAATTGGGAACCGA	BIRC3
AATGGGCTTTAGTAGAAGCC	BIRC3
CCTCATCTACTTGAACAGGT	BIRC3
AAGTGGAATACGTAGACATT	BIRC3
GAACATAAAAAGCATTCGTC	BIRC5
AGTTCTTGAATGTAGAGATG	BIRC5
CAGGCGCAGCCCTCCAAGAA	BIRC5
CAAGTCTGGCTCGTTCTCAG	BIRC5
GCTGCGCCTGCACCCCGGAG	BIRC5
ACTTACATGGGGTCGTCATC	BIRC5
AGAAAGGGCTGCCAGGCAGG	BIRC5
CCAGTGTTTCTTCTGCTTCA	BIRC5
GAGGTCCATACCCCACATTG	BLOC1S1
CCAGAGAAAGCTGGACCATG	BLOC1S1
GGCCAAGCAGAATGAACGCA	BLOC1S1
GCGGGACAGCATGGTCACGT	BLOC1S1
GATCCACCAAAGCTTCTGTC	BLOC1S1
GAGGTGAGCGTTCCAGCTTC	BLOC1S1
CCCAGAAAAGAGGAGGCGAG	BLOC1S1
GGCCTGTCTGCTTGGCAAAT	BLOC1S1
TCACCATAAAAGAGTCGCTG	BMF
GGGAGCCGGTGACCCAACCC	BMF
CACAAGGCAGCATGACACCT	BMF
AGACTGCTGGGAAACTGGCA	BMF
GGCTGAGGGGGCAGTCCAGT	BMF
TGGCCTTCGACCCACCAGCC	BMF
TCAGTGTGTGGAGGAGCTGG	BMF
GGGCCACAGCAGTGGGTGAG	BMF
TGAGGTGATAAACTCCTCCG	BMP2
GGGCCGCAGGAAGTTCGCGG	BMP2
TACAGGTCTAGCATGTAGGG	BMP2
AGTCCACCGCATCACAGCGG	BMP2
GGTCACGGGGAATTTCGAGT	BMP2
ACCCGCCCCAGACCACCGGT	BMP2
AGAGACATGTTAGGATAAGC	BMP2
TCCTGAGCGAGTTCGAGTTG	BMP2
GTTCATGGGTAGCTCCACCC	BNIP3L
TCAGGACAGAGTAGTTCCAG	BNIP3L
TCCTCATCCTCCATCCACAA	BNIP3L
AATGGCAATGGGAAAAATGG	BNIP3L
TGGGCAGATCATGTTTGATG	BNIP3L
CAACAACAACAACAACTGCG	BNIP3L
TTTGAAGAAAAGTGCGGACT	BNIP3L
CAGCAGGGACCATAGCTCTC	BNIP3L
ATACCCAATAGAGTCCGAGG	BRAF
TCATAATTAACACACATCAG	BRAF
GGCAGGAAGACTCTAACGAT	BRAF
ACAAATGATTAAGTTGACAC	BRAF
ACTAATTTAGGATCAACCAC	BRAF
AACAGTTATTGGAATCTCTG	BRAF
GAGAGAAGAAACCAATTGGT	BRAF
CTCAGAAGACAGGAATCGAA	BRAF
AGAAACCTACAACTCATGGA	BRCA1
GCAGCATTTGAAAACCCCAA	BRCA1
AGGAAACATGTAATGATAGG	BRCA1
GCAGAACTAGGTAGAAACAG	BRCA1
GTTTCTATCATCCAAAGTAT	BRCA1
GGCTCAGGGTTACCGAAGAG	BRCA1
TTACATATTAAAGCCTCATG	BRCA1
CAGACAGTTAATATCACTGC	BRCA1
AAGTACGAATGTGAGCTGCA	BRMS1
AAGGGGCTCCGTGTATTCAG	BRMS1
GGGAACGACTGAGTCAGCTG	BRMS1
CCACCTGAATGCGAATCTTG	BRMS1
TTCTGCTGCTGAGATGAATG	BRMS1
CTGCTCTATGACACGCTGCA	BRMS1
CGAGTGTGTCAGTGAGATGC	BRMS1
CAGCCAGACAGAGTCAGAAG	BRMS1
GAGGCTTAAGGTCTTCAGCG	BTG2
CTCATAGGGGTCCACCCACA	BTG2
TTTCCCGAAAAGCCGTCCAA	BTG2
GTGGTGTTTGTAGTGCTCTG	BTG2
CATTCGCATCAACCACAAGA	BTG2
GAAGGGAACCGACATGCTCC	BTG2
CTGGCTGAGTCCGATCTGGC	BTG2
TCCAGCCTCCTGAGGACCCG	BTG2
ACCGACAGCACACCTCACAT	BTG3
AATGGAAGTGAAACCCAGTT	BTG3
TGCATCTTGTATAGTGACCT	BTG3
GGATCCTGAATGATAATCAG	BTG3
TATCCAGAAAAACCATCGAA	BTG3
ACATGATAAGTTGAAAAAAG	BTG3
TCACAGGCTTTCAGGACATC	BTG3
AGAACAAGGATGAGATCTCC	BTG3
TAAAATTATACAAGACATTG	BTRC
GTAATAATGGCGAACCCCCT	BTRC
AAATGTGTCATTACCAACAT	BTRC
GTATGATTGTGCCCAAGCAA	BTRC
AGTGCAGAACTGCTTCACAA	BTRC
AGAGGCCTGGCAGAACGAAG	BTRC
CCTTCGAGACAACACAATCA	BTRC
CTGAACTTGTGTGCAAGGAA	BTRC
GGTAGCAAAACAGTGTACCC	BUB1
TGATGAATCTTGGGTCATTG	BUB1
CAAGGAGAAGCTTATTCGTG	BUB1
AGGTTAATCCAGCACGTATG	BUB1
CAGTGGCCAGCAAAGATGCT	BUB1
GAAACCCATTTGCCAGCTCA	BUB1
AGAAAATGTAAGGTCATCTG	BUB1
TCCAAAAACTCTTCAGCATG	BUB1
ACCTATCCCAAACATCCAGA	BUB1B
AGTGAAGCTGTATTGCCACG	BUB1B
AAAATGGAGAAAGGTACACT	BUB1B
AAGTAACTGTACATATCCAA	BUB1B
TGTCTCCAGATGTTTGTGTA	BUB1B
GCTCCAATCATCCGTGTAGG	BUB1B
ACAGTCTCTCAGGATCAGAA	BUB1B
AAGAAGGAGATCCTCTACAA	BUB1B
GTATTCAACACATCTGATAG	BUB3
CGGCTCAAGTACCAGCACAC	BUB3
AGTCCCACACCAACACTCTG	BUB3
GGGATCAGACAGTTAAACTG	BUB3
ACGAGCGTTTCCAAACAAGC	BUB3
TTCTCTCAGCCTGAAAAGGT	BUB3
GTTGGGGCTGAACTTCACGG	BUB3
CCAACGCATGCCTGGAGTGG	BUB3
AGCTGAAACAGAACCGCATG	BUD31
GGAGTTGATTGAGCCAACAC	BUD31
AGAGGAAAGTGGAATCTCTG	BUD31
GCTGAAACAGAACCGCATGA	BUD31
AGCCGGAAAGCACCCCCAGA	BUD31
AAAGAGGTCGAAGATGTAGC	BUD31
AAGCGGAAAGCCATCAGCAG	BUD31
ATTGCAAAATGGAAAAAGCA	BUD31
CAACGTCATCTCGTACTCGA	BYSL
TCAGGATGGATCAGATGACG	BYSL
GTATTATCTAAGTACCGCAG	BYSL
CGAGGCCGAGCATGGGACTG	BYSL
CCTCCGGCTCTGTGACGTAG	BYSL
GGTTGAGACAGTCATGTCAG	BYSL
TGGCCGATCAGATCCTGGCT	BYSL
CCAGGCTCCAGGTTTGAAAA	BYSL
GGGCAGCGACCGACTCAACG	TEDC1
TAGATCCACCTGTACACACG	TEDC1
ACTTGGGTCTCTGTAGGACA	TEDC1
CCATCAGCCACTGCACATGG	TEDC1
GGCACTGGCACAACTACCTG	TEDC1
CAAGTTCGACCGTCCGGAGG	TEDC1
ACAGTCATCTCGTCACCCAG	TEDC1
CCAAGCGGGCTTGGACCTCT	TEDC1
TTGCCAGGGTTCACACAAGG	C15orf65
CCTTTGGAGTATAATTGCAG	C15orf65
CTGCCTCCTTGTGTGAACCC	C15orf65
GGATTGCCAGGGTTCACACA	C15orf65
AAAACCAATTCAAGTCATTA	C15orf65
TTGATAGTGAGGTGGCTGTC	C15orf65
TCCAACATACATGAAAACAC	C15orf65
ATTTCTGTGTCTGAATTTGA	C15orf65
TTCTCCCTCGAGAAAAATGG	C16orf82
CGCTGCTCTGGGTGTCACTG	C16orf82
TTCCTGCTCATTCTGGACAG	C16orf82
GGGGACTGGAGCTCTAAGCT	C16orf82
CCTGAGCAGCGGGTACGCAG	C16orf82
TTTCCAGCGTGCAGCACCCG	C16orf82
GGAGGGCAGCGACATCAGCT	C16orf82
CCTGCGTGGCCACGCCATGC	C16orf82
GGTCGGAGAGATCTTCTCGG	C17orf49
TGGCCGACTCTTCTCCTGCG	C17orf49
CAGCTCCCCGAGCTTCGTGA	C17orf49
ATATACCTTGCGTTTCACAG	C17orf49
GGCTGCTGTGAAGCGATTTG	C17orf49
CGCCGCCTTCACGAAGCTCG	C17orf49
TCACATCAGCTGTGTCATCA	C17orf49
CCAGCTGAGTCACCCAAGAA	C17orf49
TCCACTCAGATCAACTACCC	C17orf53
GACAGCCGTCCATCATGCAT	C17orf53
TGCGGTTGTAAGGGTATCCG	C17orf53
GAGACTGGAATGGCTGACAA	C17orf53
CCACAGCACCAGGTCTCAAG	C17orf53
AAAGGTGAGTAGGGGGTGTA	C17orf53
GCCTAGAAGAGACAGGTCTC	C17orf53
GCCAAAACTCGCCGTTTCCC	C17orf53
GGGAGCGATAACACGACCTG	C19orf53
TGGGAGCGATAACACGACCT	C19orf53
TCGTGTTATCGCTCCCAAGA	C19orf53
GCAGCCTCTGAAAAGAATCG	C19orf53
GAAGAAGATCGAACATGACG	C19orf53
CTCCCTCAGAACCTAGAAGT	C19orf53
CGCAAAGAGTAAGACGGCAG	C19orf53
GCAGGGGCAGCGCAAGTTTC	C19orf53
CTCCCACGCAGACAGTAGTG	C19orf73
CCATTAGCCTCGTCCGCCGG	C19orf73
AAAGACGCGCTGTGTTTGGA	C19orf73
AGGTGGAGTGAGCGCCCGGT	C19orf73
CCAGAGTCCTGAAACGCAGC	C19orf73
AAGGTTGGATTTCAAGGCGG	C19orf73
GGTGCCGCGTGCAGTTCCCG	C19orf73
GCTCCGCCCCGCCCACACAG	C19orf73
CATCGTCCTGGACAAGCTAG	C1orf109
TCTGAAACACTCGCTCCACA	C1orf109
GAGCAACACGCAGACACAGT	C1orf109
CTCAAACCGCAGGTTCTGTG	C1orf109
CCTTCCCAGATTTAAAAGAG	C1orf109
GAAGAAGTGCTTCCCCGTGG	C1orf109
GAGGGGCTGGCAGTCCCGCA	C1orf109
ACAGAGGGGCTCACTGCTGA	C1orf109
AGGCTCGTTTAGAAGTGCAC	C1orf131
CATAACCCGTGATACCAAAC	C1orf131
GTTCTCTCATAAGAGGCCAG	C1orf131
AGCAGAGCGTCAAGAAGTGT	C1orf131
ACATCTCTCTCCAAAACACT	C1orf131
CAAGGATCTCTGGTCCTGTG	C1orf131
GAGAGATGTGATGGCTTCAG	C1orf131
CTCTTCCCTAAAGAACAATA	C1orf131
CATGACTCGAGCCAGCAAGT	C2orf81
GTAGCTGAGGACCCCACATG	C2orf81
TCCGCAGCTGAGAGTCACGT	C2orf81
AACGACAAATGGAAGCCGAG	C2orf81
GGCAGTGAGATGTCGGAAAG	C2orf81
GAGCGCGAGCTTCCAACTGT	C2orf81
CCAGGCACAATATCCACCTG	C2orf81
AACACGCCCGAGGCGATGCA	C2orf81
CAAACTCACTGGGCCGCCCG	C4orf46
CAGGAGCAGCGGCCCAACGG	C4orf46
GCAGAGGCGTCTGAAGAGGA	C4orf46
GGTGGACCAGCTGGAGGAAG	C4orf46
GGCCGACCCTGAGGAGTTGC	C4orf46
AGGGAGAAGAGGGAGGCGGC	C4orf46
TGGGCTGGCCAGTTCCGAGC	C4orf46
AGATGTGGCTTCAAGAAGTT	C4orf46
GATGACGACAAACCACAGCA	PPDPFL
TCTGGCTAGAAGGCAACCAA	PPDPFL
GCTAGAAGGCAACCAATGGA	PPDPFL
CTGAAGTGGCAGAATCCACC	PPDPFL
AATAACTAAGTACCTTGCTG	PPDPFL
TTTAATAGGGTTGCCTGAAG	PPDPFL
AGAACTAACTGAAGAAACAC	PPDPFL
ACTTCGATAATACTGATTTC	PPDPFL
GCAATGATGGCGATTCCGTG	CA8
GAGGCGGACATCCAACAGCG	CA8
GTACGAAGTGAGATTTCACT	CA8
CAAACAGAGTGGAGTTCCAG	CA8
GGGTGTGGAGTGGGGCTACG	CA8
CTGAATGGTATGTCCATCAT	CA8
TTACCTTATACTGAATATCT	CA8
CCTCATCCTCTTCCTTCTCG	CA8
GAGCTGTAAATCAGCTACCA	CAB39
GTGCAGATGTATTCAACAGT	CAB39
CTAATAGGGCAAAAAAGACG	CAB39
CCAGAAATAGCTCTAAATTG	CAB39
AGAAGAAGTTTCCAAAAATC	CAB39
AGACATTGTGAAGAATCTGA	CAB39
TGAGCTACTGCTTCTGTCTG	CAB39
AGATGCATTTGCCACATTCA	CAB39
GGAACAGACCAGCTACATGG	CABP1
GGATAGATCACTGCGACCAG	CABP1
GGCCTTCAGAGAATTCGACA	CABP1
CAGTTCGATGAGCTCCATCT	CABP1
ATCCACTGAGAAATCTCTCA	CABP1
ATGACTTCGTGGAGCTAATG	CABP1
GCAGTCATGCACAACCTGCT	CABP1
AAATCTACATGGCCACCCAC	CABP1
AAGTCAGTAACACACCATCG	CAD
TAGGACATGAGGTGTTCGAA	CAD
TCCACGGGTATTCAATACAG	CAD
ATGGAGAACTTGGACCCACT	CAD
GTGATTAACCTGTCAATGCG	CAD
AGTGAAACCAGTCAGCGATA	CAD
GGCTGCCACCACACCATCAG	CAD
CCACGTCAGCACCCGCCAAG	CAD
ATGCTAGGTTATGCTTGTCA	CARNMT1
GCCAGCATCTACATTTGACA	CARNMT1
GTCATAGAAAAGTTAGAACC	CARNMT1
ATGTATGCAATCATTCACAA	CARNMT1
TTGCTAAACTGATGGATCCA	CARNMT1
TCCAAGTGAAGAAGAAACTG	CARNMT1
GTGAAACTGGGAAAGCAGAA	CARNMT1
AAAGTAAATATTCTGGTACC	CARNMT1
ACAGCGCGGAGGCCGAACCG	CASC3
AACAAGTCTCATCGCCACCA	CASC3
CAGGTCCCAGTCTTAGTAGG	CASC3
ATGAGATTAGTTACCGGTCA	CASC3
CCAGCATACATACCTCGGAA	CASC3
AAAGAGCAATGAGCTCCTGT	CASC3
TGAGAAGAAATCCTATTCCC	CASC3
AAAGCACTGTGACTGGAGAG	CASC3
TAATGAGAGCAAGACGTGTG	CASP1
TACCATGAGACATGAACACC	CASP1
CTTAATATGCAAGACTCTCA	CASP1
GGAGCTGAGGTTGACATCAC	CASP1
ACAGACAAGGGTGCTGAACA	CASP1
CCACATCCTCAGGCTCAGAA	CASP1
AAGAAGACAGTTACCTGGCA	CASP1
GAAAAAAAATCTCACTGCTT	CASP1
AACTCTAAAAAAGAACCGAG	CASP2
AATTCTCACCTGTCGACAGG	CASP2
TTACTAAAGCTTCATACCGG	CASP2
ACTGGAATTTCGCTCTGGAG	CASP2
GACTGCAACCTATATGCCTG	CASP2
TCTTGTGTCTTAGGCCAAAG	CASP2
AGTCACGGACTCCTGCATCG	CASP2
CTCCCTCAGTGCTTCACAGA	CASP2
GTCCAGTTCTGTACCACGGC	CASP3
GGAAGCGAATCAATGGACTC	CASP3
ATTGTGGAATTGATGCGTGA	CASP3
CAAGGAATGACATCTCGGTC	CASP3
AAAATGGATTATCCTGAGAT	CASP3
CAGTGGTGTTGATGATGACA	CASP3
CTTCTGAGCCATGGTGAAGA	CASP3
GAAACTTGAAATATGAAGTC	CASP3
TATGCAAGAGAAGCAACGTA	CASP4
AAGTCAGCTCCATTCCTCGG	CASP4
TGCAGCTCATCCGAATATGG	CASP4
AGTTATCCAAAACACCAGTG	CASP4
AGGATATGGAGTCAGCGCTG	CASP4
CAGTTCCGCAGATTCCCTCC	CASP4
AGTCTCAGGAATTCTTCATG	CASP4
TGGGTTTGTCCTTCAGACTG	CASP4
GTTGGACACCAACATAACTG	CASP6
CTTGTCTTGTAGGCATGTCG	CASP6
CAAAGCAATCGGCATCTGCG	CASP6
GTAGATAAAACTACTACCTG	CASP6
AGTACAAAATGGACCACAGG	CASP6
GGACACCAACATAACTGAGG	CASP6
ACATTAACTGGCTTGTTCAA	CASP6
AAACAGATGCCTTCTATAAA	CASP6
GAAGAGGGACGGTACAAACG	CASP7
TGTAGGCACTCGGTCCCGGG	CASP7
AGACAATCACGTCAAAACCC	CASP7
TTGATATTTAGGCTTGCCGA	CASP7
TGTACTGATATGTAGGCACT	CASP7
TTTGACAGCCCACTTTAGGG	CASP7
ACTTTGATAAAGTGACAGGT	CASP7
GAGGATGCAGGCGAAGCAGG	CASP7
ATGATCAGACAGTATCCCCG	CASP8
GCCTGGACTACATTCCGCAA	CASP8
CTACCTAAACACTAGAAAGG	CASP8
TCTACTGTGCAGTCATCGTG	CASP8
AAGTGAGCAGATCAGAATTG	CASP8
AACTTCACAGCATTAGGGAC	CASP8
GACTATGAAGAATTCAGCAA	CASP8
ATGGAGAAGAGGGTCATCCT	CASP8
CAATCTTCTCGACCGACACA	CASP9
ACCAGAGATTCGCAAACCAG	CASP9
TGGATGTCCTCGATCATATG	CASP9
CAACTTCTCACAGTCGATGT	CASP9
ATCTCCTGCTTAGAGGACAC	CASP9
GGTGCTCTTGAGAGTTTGAG	CASP9
GAAGGGCGACCTGACTGCCA	CASP9
GTGGTGGTCATTCTCTCTCA	CASP9
AAATACGTAGACTCGGAGGT	CAV1
TAAACACCTCAACGATGACG	CAV1
AGTGTACGACGCGCACACCA	CAV1
CATCTACAAGCCCAACAACA	CAV1
ATGTGATTGCAGAACCAGAA	CAV1
ATCCCGATGGCACTCATCTG	CAV1
CCTTCACTGTGACGAAATAC	CAV1
CACCGTTCCCATCCGGGAAC	CAV1
TGTGGCGGATCTGTGTACGC	CBX6
AACCTGAAGGTGATCGACAA	CBX6
ATGCACATCACTGATGCGGA	CBX6
ACTCGGCAGGTACAGCACTT	CBX6
GGGCGGCCAGAAGTAGCCCA	CBX6
CCGAGAAGGGCGAAATGGGC	CBX6
AGCCGTGCACCGGCTCAAGA	CBX6
AGAGGGAGCGTGAGCTGTAT	CBX6
CAAGCCCGAGCCCGTCATCG	CCDC12
TTAATTGCACCCTCTAGTGG	CCDC12
GCTGCGGAACTATGTCCCGG	CCDC12
AGGCGTTGCGGCGAAAGGAA	CCDC12
AGGCCCTACGGGAGAAAACC	CCDC12
ACCTGGCCAACCTCGCTCCT	CCDC12
GGCTGGTGTGGGCCGGCTAG	CCDC12
GACCAAGCATCTCAGAGAAG	CCDC12
GTGGTACTTGGACTACCCGG	CCDC144NL
AGTGGTACTTGGACTACCCG	CCDC144NL
CAGTGGTACTTGGACTACCC	CCDC144NL
AGCTGGTGGAAGAACAGCGT	CCDC144NL
CCCTAGTGTTGGGAGCCAGG	CCDC144NL
AACACTAGGGGTCTTCCTCG	CCDC144NL
CCAAGACGTGCTCCACCCCA	CCDC144NL
CTTCCAGGCGGACATCGTGC	CCDC144NL
ACTTCAGCGCCAGCAATGGG	CCDC174
ATCTGGAGCAAACAGAATGT	CCDC174
TTCCCGGCGCTGTATGAGAA	CCDC174
CATAGAGATTCTCAAAAGGC	CCDC174
TCTTCTGTGTGAAATCCACA	CCDC174
ATACCCAACACCAAGTTGCC	CCDC174
AAACATAAAGGAAAAGCGAA	CCDC174
GTTTGAATTCTTCTTGCTTT	CCDC174
TTCGTGGGGAGCGTTCGCGA	CCDC59
CCTGGTGGTATTGAGGCGCG	CCDC59
ATATTCCTCAATGTAGGACA	CCDC59
AGAATGTGAGACAGAAGACA	CCDC59
AAAGTTACAAGAAATTGCTA	CCDC59
ACATCTCTATTTAGCTGAAG	CCDC59
ACTGTTCTTCAAGCAACGGC	CCDC59
CTACACTGATCTTCAAATAA	CCDC59
GAGATATCTCTAGGCGATGG	CCDC6
CATCTCGCCGTTCCGCCTGG	CCDC6
TCCTGCTCGTCGACCTCGGG	CCDC6
GCTCTCCAGAAAATTGATGC	CCDC6
ACATGAGAGAAGAGAACTTG	CCDC6
GGCACTCACGATGGTCACGC	CCDC6
AAGCACTAGTTAATCGCCTC	CCDC6
TAATGTAAGTTGCTTAGAAA	CCDC6
ACAAACTCGTCTACTTCAGG	CCNA1
AGATGAATCTACCAGCATAG	CCNA1
AGGCATGCGCACGATTCTGG	CCNA1
AAGAAAGCACTCCCTGACTG	CCNA1
ACAGCTGCTCGGTCAGAGAG	CCNA1
TCAGAACAGACATACATGAA	CCNA1
CTGCAAATGGGCAGTACAGG	CCNA1
AGAAATTTATCAGTACCTTA	CCNA1
CTGAAGTCCGGGAACCCGCG	CCNA2
ATTGACATGTCCATAGTATG	CCNA2
GTGGACTGGTTAGTTGAAGT	CCNA2
TGAAGTACCAGACTACCATG	CCNA2
GCCTGCGTTCACCATTCATG	CCNA2
AATGGCTGAATTAAAAGCCA	CCNA2
GGACCAGGAGAATATCAACC	CCNA2
TCTTCCATGTCAGTGCTGAG	CCNA2
CATCAGAGAAAGCCTGACAC	CCNB1
CAGTGACTTCCCGACCCAGT	CCNB1
GAGGCCAAGAACAGCTCTTG	CCNB1
TGACTGTCTCCATTATTGAT	CCNB1
ATATTTGCTTGCAATAAACA	CCNB1
TCTTGAAAAGGTACCTATGC	CCNB1
ACATATTCACTACAAAGGTT	CCNB1
AAGTTTACCAAAATAGGCTC	CCNB1
GAGACTCTGTACATGTGCGT	CCNB2
ACGCATGCGTGCCATCCTAG	CCNB2
TTCTGTCAAACCAGTACAGA	CCNB2
TGCCTTGCTCTGCAAAATCG	CCNB2
TTTATGGACTGCAAAACCTG	CCNB2
GGTGGGTTGAACTGGAACTT	CCNB2
GGAAGAAGCTTCAATTAGTT	CCNB2
GAAAGAATTGAAATTTGAGT	CCNB2
GTGTTCAATGAAATCGTGCG	CCND1
GGTTGGCATCGGGGTACGCG	CCND1
CGTGCCTCCGTAGGTCTGCG	CCND1
AGAGGCCACGAACATGCAAG	CCND1
TGTGGCACAGAGGGCAACGA	CCND1
ACATTTGAAGTAGGACACCG	CCND1
TCTACACCGACAACTCCATC	CCND1
CCTGGACCGCTTCCTGTCGC	CCND1
ATGTGCTCAATGAAGTCATG	CCND2
TGAAGGTCTGAGCATGCTTG	CCND2
ACTCCCATTATAGGTCTGTG	CCND2
CACTTGAAGTAGGAGCACTG	CCND2
GTCATTACCAGCAGCTCCTG	CCND2
AGGAGTTGCAGATGGGACTT	CCND2
AGAGACCAGCCCGCTGACCG	CCND2
GAGCAGGTTGCGGTCCCGCA	CCND2
ACACACGCACCCGCAACTGG	CCND3
GTCTTGCGTCCCCACCCGAA	CCND3
ACCAAGGCCTGTCGGTCACG	CCND3
GGGAGATCAAGCCGCACATG	CCND3
CATGTGCAATCACAGCAGCC	CCND3
GGCTCTTACCTGTAGCACAG	CCND3
GTACGTAGCGCTCCTCCAGG	CCND3
CCAGGTAGTTCATGGCCAGG	CCND3
AGCCAGGACACAATAGTCAG	CCNE1
CTGGATGGTGCAATAATCCG	CCNE1
CAGACTGCATTATTGTCCCA	CCNE1
TCTTCTGGATTGGTTAATGG	CCNE1
TGGCACAAGATTTCTTTGAC	CCNE1
CTGGAAAATCATGTTAAACA	CCNE1
CAGTTTGCGTATGTGACAGA	CCNE1
GGCTCGCTCCAGGAAGAGGA	CCNE1
GGTGTTTCAATGATAATGCA	CCNE2
GGATGTCAAAAAAAGAAGAG	CCNE2
CTGACTTGGAACCACAGATG	CCNE2
CATCTTTAAGAGCATCAACT	CCNE2
TGAAGAGGATATCTTAAGGA	CCNE2
ATTCATTGCTTCCAAACTTG	CCNE2
GGGGATGTTCAAAAGAAGTC	CCNE2
TAGATTTATGTTGACACAAA	CCNE2
GCAGTCAGGGCAATTTGGGA	CCNH
AGTTTACCTTTAAGTCGATG	CCNH
CAGTAATGGAATATCACCCC	CCNH
GATTCTCCAATATGGGATAG	CCNH
CAAATTCAGATGCAAAGCCG	CCNH
TACATACAAGCCGTACCCTA	CCNH
GTCCAAGAGGACTCTCCCGG	CCNH
CAGAGTGTCATTTCTTCATG	CCNH
TTGAAATCGAACAAACACAT	CCNL1
TAGTTCTGATCAAGGATCAG	CCNL1
AGGCTGGAGAAAATCCACCC	CCNL1
GATCGGCGATCGCCTGTACT	CCNL1
TGCAGGTGGCGATGGCAACG	CCNL1
ACTCTACAACTCACCTTATG	CCNL1
TACCAAAAAGAAGAAACCAA	CCNL1
GCTCGACCTGCCCAGTGAGA	CCNL1
ATCATTGGTTACCATAAGAG	CCT2
TCATCCACAGACCATCATAG	CCT2
TGGAAGTTGCAAACTTATCG	CCT2
GTTGAACGTATTCTTAAGCA	CCT2
TGTAGAGTCAACTCTTACCC	CCT2
TCAAGATTTAATGAATATTG	CCT2
ATTCATATTATCAAGAAGCT	CCT2
AGGGTTCAAGATGATGAAGT	CCT2
GGTGACAACTGTTGACCCTG	CCT5
TGATTGCCATCGCAACAGGA	CCT5
GAGGACACTAAACTGATTAA	CCT5
CACCCAATCAGAATAGCCGA	CCT5
GGCCTCAAGTCCCATAAGAC	CCT5
GGCCACCATCTTAAGCATGA	CCT5
GGCTTTATAATCTTCGACAG	CCT5
AGCCCCACTGACAAATTGCT	CCT5
CTAATGACACGTTACAAGTG	CCT6A
GTCAACATCAGCGCAGCGCG	CCT6A
CAGGGAAACACTTATAGATG	CCT6A
CATCCTAGAATAATCACTGA	CCT6A
GACATCAAACTTACTAAAGA	CCT6A
CTAAAAGGAGAAATATGGAG	CCT6A
ATAAATCTGAAACTGATACA	CCT6A
GTCTGTGGCGATTCAGATAA	CCT6A
GTTTCTAAAGCGCGTCGATG	CD14
AATCCTGGACTGGGCGAACG	CD14
GGAGTACGCTAGCACACGCA	CD14
TCGCCCACGACACGTTGCGT	CD14
CAGCTCACAAGGTTCTGGCG	CD14
TGGAAGGCTTCGGACCAGTC	CD14
GGGCAATGCTCAGTACCTTG	CD14
AGCGCTGCGCAACACAGGAA	CD14
GTGCCACAAAGACCATCAAG	CD2
CTTGATACAGGTTTAATTCG	CD2
AGAGGGTCATCACACACAAG	CD2
ACAGCTGACAGGCTCGACAC	CD2
CAAGTTGATGTCCTGACCCA	CD2
CTTGTAGATATCCTGATCAT	CD2
ATATTTGATTTGAAGATTCA	CD2
ATGATATTGACGATATAAAA	CD2
TCAGACCGTACCTTGCAACA	CD38
TCTGGCCCATCAGTTCACAC	CD38
AATTCATCCTGAGATGAGGT	CD38
CTGGAAAACGGTTTCCCGCA	CD38
TGAATTCAACACTTCCAGTG	CD38
TGCTCGCGGTGGTCGTCCCG	CD38
TACTGACGCCAAGACAGAGT	CD38
GCATCGCGCCAGGACGGTCT	CD38
CTTGATGACCTCGTCCCATG	CD44
GCAATATGTGTCATACTGGG	CD44
AAGACTCCCATTCGACAACA	CD44
TGCTACTTCAGACAACCACA	CD44
TCGCTACAGCATCTCTCGGA	CD44
GGCACCCGCTATGTCCAGAA	CD44
TCTGTGCTGTCGGTGATCCA	CD44
TCTTCAAATACCATCTCAGC	CD44
CCACATTCATTACAGCACAC	CD69
TCATGACGTGTTGAGAAATG	CD69
GTGGGCCAATACAATTGTCC	CD69
AGGACTGGGTTGGCTACCAG	CD69
AGCTCTTTGCATCCGGAGAG	CD69
ACTTTATTTCTACTGTGAAG	CD69
GAAGAAACATGGCTGTCTGA	CD69
CAAAATGCTTGTTCTGAACA	CD69
ATGAAAAATGGTATAACCCA	CDC14A
ACATCTGTGAGAACACCGAA	CDC14A
ATACCTGAATGGAAGATAGG	CDC14A
AATGAAAAATGGTATAACCC	CDC14A
CCACTATTTCTCCATCGATG	CDC14A
CAGAAAACAAGCATCGTTGT	CDC14A
GCTAAACAAAAAGATTTATG	CDC14A
TGACTTTGAGACATTTGATG	CDC14A
AGTTCTATCTGTCTTCTACG	CDC16
ACGACATGCTTCATACAACT	CDC16
CACATGCTGACAGCACAAGA	CDC16
AAAGTAGCTTCACTCTCTCG	CDC16
CTATGGACATTCATTTGCGG	CDC16
TCAGGGATGACCGTTTCACT	CDC16
GGATGTTACTATCTCATGGT	CDC16
GGTAAACAACTTGCATGGAA	CDC16
TCCCAGAACTCCAATCCACA	CDC20
GGCCAAATGTCGTCCATCTG	CDC20
GACCAGTCACTCTGCCCGAG	CDC20
CAGTCTGTTCTGATAACCTG	CDC20
TGGGGAATATATATCCTCTG	CDC20
CCAGGAACATCAGAAAGCCT	CDC20
CTTGGAACTGGATTTGCCTG	CDC20
CCAATGCACCCCCTGCGCGC	CDC20
GTTGCCTATCACAATATCAG	CDC23
ACTAATGGGACATGAGTACA	CDC23
GGCGCTTAGAGAATTGAGAG	CDC23
GGATATGGATGCCTATACCC	CDC23
GATATTTATCAATCTCACAG	CDC23
AACCAGGCTCCCCAATGCAA	CDC23
TGTATTCCAGATATCTGGTG	CDC23
GTGTAGTAGGCCCCGCTCCC	CDC23
TTTGTAGTTCTCATGACGAG	CDC25A
TGATTATGAGCAACCACTGG	CDC25A
GTAAAGATCTCTTCACACAG	CDC25A
GCCAAATAGCGCCTTCACGA	CDC25A
GAGACCAGAACGATCTCAAG	CDC25A
CATGGTCAAGAGAATCAGAA	CDC25A
GACAGCCACTTTGTCTGATG	CDC25A
ATTGTCCAAAATGTTCTCAA	CDC25A
TGGTGATGTTCCGAAGCACG	CDC25B
TTCGGATGCCCGTCGAGACA	CDC25B
TGGATGTACCATCAGGTCGG	CDC25B
CCCTATGGACCCCCACATGG	CDC25B
CGCCCGTGCAGAATAAGCGG	CDC25B
GGCACTTGCTGTACATGACG	CDC25B
GATTTGTCTTCAAGATGCCA	CDC25B
GAGCCCGGCGAGGTCGTGCA	CDC25B
TGCTAAGATTCGAAAGATCG	CDC25C
CAAGTTCTCTGGCATCGACG	CDC25C
GATGTCCCTAGAACTCCAGT	CDC25C
TGGAGGAAGATTCTAACCAG	CDC25C
TTGGATAAAAATCCAAACCT	CDC25C
CAATATACTTGACAGGACAA	CDC25C
TGGCCAAGGAAAGCTCAGGA	CDC25C
ATATTTGATTGCAGGTCACC	CDC25C
GAACATTCGAAAGGACCTGG	CDC26
AAAGTTGTATTCATACCTCC	CDC26
TCAGACCCGTAAGAAACAGA	CDC26
AGAGTTTGAGAACATTCGAA	CDC26
TGTCATCAAGCTTTAGCTCT	CDC26
GGGATCACTGCTAAGCCCAA	CDC26
GAAGATGTGGAAGTTGTAGG	CDC26
TAGCAGTGATCCCAAGAGCC	CDC26
ATTTAAGATCTGGCTTCCCG	CDC26P1
TGAATTGCTAATAGTTCACT	CDC26P1
AGAAGATTTGTCTCTGCAGG	CDC26P1
GCTGGAATGGAATAAAATGA	CDC26P1
GCTTCACTTGCACTCTAAGC	CDC26P1
TTGACTTCAGTATGCTGAGA	CDC26P1
CAAATGATCAATGATCGGAT	CDC26P1
TCTGTTTCTTACGGGTCTCC	CDC26P1
GATGGCACATCAATTACAGG	CDC27
ATGATTCAAAGGGAGACCAG	CDC27
TGAATCAATATAAGACACTG	CDC27
ACAGGTTGCCAGTAAAAACA	CDC27
TTGGGGGAGATGTAATAGTG	CDC27
TGAGCCTTCTTCGTGAAATG	CDC27
CTGTGAGATAAACTATGATT	CDC27
GAATTATAGAGTTGAAGGCA	CDC27
GCTGGCCAAGAGCCTAAAGG	CDC37
TTGGTATTTACCATGCTCTG	CDC37
TTGGTGCATTGACCTAGAGG	CDC37
GACGCACCCCAACATCGACA	CDC37
GAGAAACAGATCAAGCACTT	CDC37
GCCCTCCATGTACTGGCGAT	CDC37
CCGCGAGTGCAAGCGCAAGG	CDC37
CTTGCGCAGCTGCTGTGCCT	CDC37
TCGTTGGACTAACAGACCAG	CDC45
GAACCAGCGTATATTGCACG	CDC45
CAATGTATACAACGATACCC	CDC45
CATACTGCTCGTAGTCAAAG	CDC45
AGCCTTCTGAGAAGCGCACA	CDC45
CCGCCACAACCACCGGAACG	CDC45
GTTGCACAGGCTGTCATGGA	CDC45
CAGGTTGAAGAATATCCAAT	CDC45
CAGACTCTCAATGTACCTTG	CDC6
CCTTGTTCTCCACCAAAGCA	CDC6
ATAGCGTGTACAATACATCC	CDC6
GGTGGGAAGTTCAACAGCTG	CDC6
GTGAGACTATTCAAGCAAGA	CDC6
TACACGAGGAGAACAGGTTA	CDC6
AAGAGGTATCCAGGCCAGCT	CDC6
TGTCATCAGGAATTTCTTGA	CDC6
TAGGGGGCAAGATAATGTCA	CDC7
AATTGCTGGGCTTAACATCA	CDC7
AACAAATCCCACATAATCAC	CDC7
TTAAACACATTACTAAGCTG	CDC7
AGGGGGCAAGATAATGTCAT	CDC7
ATCTGTTGCATAGCAGTCAC	CDC7
GCACAAATTCAGATTAAACA	CDC7
CATGAAGCAGTCAAAGACTG	CDC7
CCAAGACCAACTCCTTACGG	CDCA8
CTGGGGTAACAGTGTTAGCA	CDCA8
TCAAGCAAATTGAGTCAGAC	CDCA8
ACTGTTTCTTACAGCACGAA	CDCA8
TCTACAACATCGAGATCCTG	CDCA8
GCCTGGAGTTGGTTTGACCA	CDCA8
ATGTTTGTCATAGGCTGACC	CDCA8
ATGAACTGGCTTGACTACTT	CDCA8
TTCGGATCTACTACACCTCG	CDIPT
CCAGAATCGCAGCAGACCTG	CDIPT
GCTGATTTGGAAGAACAGCG	CDIPT
AGACAATCCGGGCATAACCT	CDIPT
GTCCAGCATGGCCCCAAACC	CDIPT
GTTGACCAACAGGCACATGG	CDIPT
ACAAGATGATCGACTTGTCC	CDIPT
GGCCTGCTGGACGCTTTCGA	CDIPT
GACAAAACACAATCCCCTGT	CDK1
AAGGGTAGACACAAAACTAC	CDK1
GTATTCCAAAAGCTCTGGCA	CDK1
GAATCCATGTACTGACCAGG	CDK1
TTTAATAGGTAGTAACACTC	CDK1
ATTTCCCGAATTGCAGTACT	CDK1
CCTATACTCCAAATGTCAAC	CDK1
TTCGTCATCCAAATATAGTC	CDK1
AAGTTCAAAGCGTTCGAATG	CDK12
CCAGTCCCTATGGTCGAAGG	CDK12
GGCCATAAGAAGCTCCCGAG	CDK12
CTAGCAGTCCCATTAAGTCA	CDK12
TAAACCCATAGCACTGAAAG	CDK12
GACAAACAGAAAGCGACTGG	CDK12
CATCTCCAGGTAATAAGGGT	CDK12
CAGGCCACACAGCTGGACAA	CDK12
TGTTCGTACTTACACCCATG	CDK2
TCTGCTTATTAACACAGAGG	CDK2
CAAATATTATTCCACAGCTG	CDK2
TGAGAAGCATTACCTTGATG	CDK2
AAGCAGAGAGATCTCTCGGA	CDK2
CAGAAACAAGTTGACGGGAG	CDK2
GGTGGAGGACCCGATGAGAA	CDK2
GGTGCAGAAATTCAAAAACC	CDK2
CCAGATGGCACTTACACCCG	CDK4
AGTGTGAGAGTCCCCAATGG	CDK4
GTCCACATATGCAACACCTG	CDK4
TGCCACATCCCGAACTGACC	CDK4
CTGATGCGCCAGTTTCTAAG	CDK4
AGCATGTAGACCAGGACCTA	CDK4
GAGAACATTCTGGTGACAAG	CDK4
GGCTTTACTGAGGCGACTGG	CDK4
CGAGGACACGATCAAAATTG	CDK5RAP2
ATACATATTTCCTAATGACC	CDK5RAP2
AGCAGATCAGCGAAATTCGG	CDK5RAP2
GTGAAACACGTGAAAATCCT	CDK5RAP2
GAGTTAAGTTCTTCAACCTG	CDK5RAP2
CAGGGCGGTACTCACACGGA	CDK5RAP2
GGAAGTAGAAAGTCTGAAGC	CDK5RAP2
TGCATGATGGCAAGCTGGCA	CDK5RAP2
GCCCGCGACTTGAAGAACGG	CDK6
AACACTCCAGAGATCCACGG	CDK6
GGAAACTATAGATGCGGGCA	CDK6
TGGCTCACCTGACCACGTTG	CDK6
TTAGATCGCGATGCACTACT	CDK6
GATACCTTTATGGTTTCAGT	CDK6
ACCTCGCGGATGGTGGAGAG	CDK6
TACGAATGCGTGGCGGAGAT	CDK6
AGCTCCAAATAGTAACTCGG	CDK7
ATCTCTGGCCTTGTAAACGG	CDK7
ATGTAGGCTTTGATGTGTGA	CDK7
ATTGGATCCTACATAGGGTA	CDK7
TTTCCATAAAATCAAAGACA	CDK7
GGCTCCCAAAAGATTTGGCC	CDK7
ATATTCTTGTTAGCTGATCA	CDK7
CGTTTCTACCAGATCAAACT	CDK7
CCAGAGTGTCACCACACGGT	CDK9
GCTTCTAAAACACGAGAATG	CDK9
GCACCCCACAGGTCAATGGG	CDK9
GCTGACTGATGAGGGCGAGT	CDK9
TCACGCTGTCTGAGATCAAG	CDK9
TGTGCTTATCACTCGTGATG	CDK9
CTGCAAGGGTAGTATATACC	CDK9
AAGCTCGCCAAGATCGGCCA	CDK9
CCATTAGCGCATCACAGTCG	CDKN1A
GATGTCCGTCAGAACCCATG	CDKN1A
AGTCGAAGTTCCATCGCTCA	CDKN1A
GTCACCGAGACACCACTGGA	CDKN1A
CGAGGCCGGGATGAGTTGGG	CDKN1A
CCAAGCTCTACCTTCCCACG	CDKN1A
TGTCCACTGGGCCGAAGAGG	CDKN1A
TTCGCCTGGGAGCGTGTGCG	CDKN1A
AGTTCTACTACAGACCCCCG	CDKN1B
GGACCACGAAGAGTTAACCC	CDKN1B
GGGCAAGTACGAGTGGCAAG	CDKN1B
AATCGAAATTCCACTTGCGC	CDKN1B
TGCGTGTCCTCAGAGTTAGC	CDKN1B
CAGGAGAGCCAGGATGTCAG	CDKN1B
ACGGGAGCCCTAGCCTGGAG	CDKN1B
AAGAGGTTCCTGCAGGCCGA	CDKN1B
ACCACGAAAACCCTCACTCG	CDKN2A
GCACGCGCGCCGAATCCGGA	CDKN2A
TCACATCCCGCGGCTCACGG	CDKN2A
GATGATGGGCAGCGCCCGAG	CDKN2A
TCCTCAGTAGCATCAGCACG	CDKN2A
CTACTGAGGAGCCAGCGTCT	CDKN2A
CGCTTCCTAGAAGACCAGGT	CDKN2A
GTGGCGGGGTCGGCGCAGTT	CDKN2A
ACGGAGTCAACCGTTTCGGG	CDKN2B
CTCCACTAGTCCCCGCGCCG	CDKN2B
CCGGTCGGGTGAGAGTGGCA	CDKN2B
GAGAACAAGGGCATGCCCAG	CDKN2B
GATGATGGGCAGCGCCCGCG	CDKN2B
GACTCCGTTGGGATCCGCGC	CDKN2B
GACCGGTGCATGATGCTGCC	CDKN2B
GCGGAGCTGCTGCTGCTCCA	CDKN2B
GAATGACAGCGAAACCAGTT	CDKN2C
TTAACATCGAGGATAATGAA	CDKN2C
GCAAAGTCTGTAAAGTGTCC	CDKN2C
AGTGTCCAGGAAACCTGCTC	CDKN2C
TTGGAAATCCCGAGATTGCC	CDKN2C
TCAAGCTGATGTTAACATCG	CDKN2C
ACAAACTAGTAAGTTGCTCT	CDKN2C
ATGCACAAAATGGATTTGGA	CDKN2C
ATGGACTGGACTGGTACCGG	CDKN2D
GGTGTCCAGGAATCCAGTGC	CDKN2D
GCTGATGTCAACGTGCCTGA	CDKN2D
GCAGCGCCGTCTTGCCGAAG	CDKN2D
GGACACCCTGAAGGTCCTAG	CDKN2D
CGCCGGCGACCGGCTGAGTG	CDKN2D
CTCACACAGGTCATGATGTT	CDKN2D
CCAGCTCCCGGTGCAGAAGG	CDKN2D
GCGTCCAGGACATGATGCGT	CDT1
TCCTGCGCGGATGTCAGGTG	CDT1
GCATGTCAAGGAGCACCACA	CDT1
CTCACCATGGCTCCTCAGGG	CDT1
TGAAGTACCCGACATCGAGC	CDT1
GCCCCGGCCTCCGCTACCAG	CDT1
CCTTCAAGGATGGCACCAGG	CDT1
GCCAGCACCTGGTACTTGTA	CDT1
CAGCTCATGAGCCACGGTAA	CEBPZ
AAAGCTCCACATATAAATGG	CEBPZ
TACTTAGATACAACATCCTG	CEBPZ
CAAATTATCAAAGTGCACCC	CEBPZ
CAACATTAAAGCCTGGACAC	CEBPZ
CCAGTTTGTCAAAAGGACGC	CEBPZ
AATATGAAAGGAGTTGTGTC	CEBPZ
GGCTACTTTGGATGAGAATG	CEBPZ
TGTTAAATTCACTCGTGGTG	CENPA
ACAGTCGGCGGAGACAAGGT	CENPA
GCGGCCGGTTACCTAAGGAG	CENPA
AGGGCAGCTTCCTTATCAAG	CENPA
AGCTCCCGGAGCTTACCAGG	CENPA
TACCTCTTGTAGGGCCAATA	CENPA
GCCGAAAGCCCGAGGCCCCG	CENPA
CCGAGCCCGACCCCGACCCC	CENPA
AGAAAATTAGCAGACAGTCT	CENPH
AGGCCAAAGGGAACAACCTG	CENPH
CGAGCCCGCGGACTCCGGAG	CENPH
TAAAAAAGCTTGCATTAGAC	CENPH
ATTAATAATGAAATCACAGC	CENPH
CCTGGAAAATGAAATTGAAG	CENPH
ACTCTTAGAATATAAATCAA	CENPH
GCAGGTCGCCGGCGCCCAGG	CENPH
GGAACTGTGACCGACAACAA	CENPI
CTCTGAAGCACACTACACTG	CENPI
GCCGTGAAGCAAAGAAACCG	CENPI
ACAGAATAAAGATAAAACCT	CENPI
CAAGTGTTCTGGTAGCACCA	CENPI
TCGAAGAACATCTCAAAACA	CENPI
TCTGATTGTCTGAATAGAAG	CENPI
GACAACAAAGCCTGGAGATG	CENPI
TACCATAAAACCATCGACTG	CENPJ
GACTAACCAGAGCACTTCCG	CENPJ
TAGTCATTGTAACCGCAGTG	CENPJ
ATCATCAGCTCCGATGTAGG	CENPJ
CCTGTGCAGCCAGTATCGCA	CENPJ
GGTCCGGGTAGACATATGAT	CENPJ
GAAAACCGTAACCATCCTAC	CENPJ
CTGTGACATGCCGCTACCTG	CENPJ
ATGTCGAAAGGGAACAACGG	CENPK
TAACCGCTGAACTCAGTCAA	CENPK
ACTCACCGATTCAAATGCTC	CENPK
GCTGAGACAAGATCTTGAAA	CENPK
GAAGACGTTCTCATAACATT	CENPK
TGAAGAAATGTGGAAAGATA	CENPK
GCTTAATATAAAAGAATATA	CENPK
ACACAGTGAATTGAAAAATA	CENPK
CATTCCTTCTGCATAAACAG	CENPL
AGAAACGATTAGAATCGGTC	CENPL
ACACAGCAATAATTGGAACT	CENPL
TACCTGCAACTGCGAACACT	CENPL
AAAGCAAAAAGGACTTGCTG	CENPL
GAAGGTAAAGTGCTGTGGAC	CENPL
TTTCCTGGATGGCTGCCATG	CENPL
GAAAGGAACACAAAGGGACC	CENPL
AACACGATCAGGTCAATTCG	CENPM
CGTACTTACCACCTGTGGCG	CENPM
CAGCATTCACCGGCACACCG	CENPM
AGAGGAGTCCCTGCGCCATG	CENPM
GGCGGACTCGATGCTCAAAG	CENPM
GCCGCCTGCACCTACCAAGA	CENPM
AAGGGAGGGACTTTGCCAAG	CENPM
CCTCTGTGTTCTGGAGACTG	CENPM
CCAGTACAAACCTACCTACG	CENPN
GCACTTGATCCATCTGTGTG	CENPN
TTGTTGTCAGTTCATTCATG	CENPN
CGGTGTATTGCGCCTCAGCA	CENPN
TGAAAATGGACCTGAGAAGT	CENPN
TCATCAGCACCAGAAAGTTT	CENPN
AGTCAGCTTCAGAGAAACTG	CENPN
TTGTGAGTTTCAAAGGTCTA	CENPN
AGTGGTAAACTGACCAGCCG	CENPO
GGCTGGTCAGTTTACCACTG	CENPO
GAATGGTGATGTATCCGGAG	CENPO
GAACCAAGATTCATAAACTA	CENPO
AGTACCTGAATGCTTACTCT	CENPO
CAAGTGAGCTAAAACACCTA	CENPO
TGTAGAACCCAACCAAACAG	CENPO
CAGCTCTTCAGACTGTTTAC	CENPO
GCGCACGTTTAAACATCTCA	CENPP
ATACACCAATTCAATTTGGA	CENPP
TGGGCTCCATTATTATGTTG	CENPP
GTCCTCACACGCTCGCCGCA	CENPP
ACCACTCCACAAAAAAATGC	CENPP
AATTAAGTGAATTTGTGTCT	CENPP
ATTATCAGGAAATTGCCACA	CENPP
TCATTTCTAAGTACGCTTAC	CENPP
AGAAGGTCTGGCATTACTAC	CENPQ
GAGACCACAGAGTTAATGAC	CENPQ
ACTCTTTGACAGAGGTTGCC	CENPQ
AAGTCTACTGAATATGGAAA	CENPQ
AAAGAGAAAAAAGGATAATG	CENPQ
ATCTCAACTTCCTGAAGAAA	CENPQ
CTGAAAGATCTGTCTTCTGA	CENPQ
GAAAGTCCCTCCCAAAAAGA	CENPQ
CAGGGAGTGATACACGTTGG	CENPT
AGACTGTCAGTGTTTCAGCA	CENPT
ACTTGGAGGAACAGACACCT	CENPT
GAAGTAGAGCCCTTACACGA	CENPT
GGGGGAAGCCGTTTCAAGCA	CENPT
GCCCGCCGAGCTGTAGACGT	CENPT
TCCAGACAAGAGAGCAGTTG	CENPT
GAAACTGGGCTGGTTTCCCA	CENPT
AGATTTAAAGTACTAACCAA	CENPU
AATAAGTACACAACGTCATG	CENPU
TCTGTCACTTCTAAAAAGAC	CENPU
AATGAAAACCAGTGACATCA	CENPU
GGAAGATATCTCATGACAAA	CENPU
CACAGCCAGGAAGAAAGCTC	CENPU
CTTGAGACATCAGAATTATC	CENPU
CAGGAAAAGAAGCAAAAAGA	CENPU
ACTCGCTTTAGAAAGCCACG	CENPW
AGACTCGCTTTAGAAAGCCA	CENPW
ATAAAGCGGAAGGCTCCCCG	CENPW
TGTCGACCATAGTCTCCCAG	CENPW
CAAACAGTAAACAGTTCAGA	CENPW
CAACTTCGTCTGGAGAAAAG	CENPW
GAGGAAGCAGATAAAGCGGA	CENPW
ATCGATTAGCAGAAGAGTCC	CENPW
TGTTATCAGCCACTTGAAGG	CEP135
AGAACGACAACTTACTCTGG	CEP135
CACCGACTTTCCATAAAAAG	CEP135
GCTCTCGTATACGCTTCTCC	CEP135
ATAAGACTAACAATATTATG	CEP135
CTCTCAGTTTCATTAACTCT	CEP135
TAAAGAGCTTGGGGAAGCAA	CEP135
AATATTTAGAACACCAGAAA	CEP135
GTATCCACAAGACCTCGTAA	CEP164
AAGTACTCGAGCAAGACCAG	CEP164
GGAAATTAGTGAACACATGA	CEP164
GGAAGCTCAACAGAAAGAGG	CEP164
GGAGCAACACAAGCGTCTTG	CEP164
GCTGTTGGCAAAGGGCGACA	CEP164
AGAGTTGGAGTCTCAACAGA	CEP164
ACTGAAGAAGAGCCTCCCCA	CEP164
GTTTCACATCAATAGCCCTG	CEP192
GGGCCAAGATCTCTTCAACA	CEP192
CCAGCAGGCGAGCACACCAA	CEP192
CTAGTAGCACTTAAGTCCAC	CEP192
CAAAGCTTCTGCCTGTACGA	CEP192
AGAAAATCTGATGTATCAAG	CEP192
ACACTTCTAAGAACGGGCGT	CEP192
GGAATTGGACCCGATCAGGC	CEP192
GGTGATCAAGGATATAACCC	CEP250
CATCCTTACAGAGTCGCCTG	CEP250
CCTCCCGCCATAGACTGAGA	CEP250
GCAGATCAGAGAGCTCGAGA	CEP250
CTGGGTCTGTAGTATCCCAG	CEP250
GCTCTCACAAACAGACCCCA	CEP250
CTGGAGTCAAGTCACCTGGA	CEP250
AATTCAAAAGAAACTAAGTG	CEP250
ATATATAGGATTAACCACTG	CEP290
GTTGGCTCTTCGAAATGAGG	CEP290
ACAAAGTAATCAATGAACTG	CEP290
ACAACAACAATCTAGGGACA	CEP290
AGCACTTTAAAGGATACCAA	CEP290
TGTAGGTAATGAATCTAGCA	CEP290
AAAGGATAAAGAATTAGTTG	CEP290
GCTCAGGGAATCTCGGAAAG	CEP290
GAGCAGTTCATAAACAACGC	CEP41
AAATCCACGCTCGCACATGG	CEP41
CTTCCAGTGTTTGATCAGAG	CEP41
GGGGAACTGGATCTAGACAA	CEP41
ATCAAATCAAGACTGGACAC	CEP41
CAGAATGATGATCTTGCCAT	CEP41
TATCACGCACATCTAGCAGC	CEP41
GTTCTAGACAGAGTTGCAAT	CEP41
CTAGAAAATTCGAGTCCTTG	CEP55
GCGACTGAGAGACCAACTGA	CEP55
CAATACACTCCGTTTATCAC	CEP55
AAGTGCAAAAAAAGATCTTG	CEP55
GGCTCGTGTATGATCAGCAG	CEP55
GCTGTTGTATTCACAAAGAA	CEP55
TGCACACTTAAAGACATCAG	CEP55
AGAAGGAGAAAGGAGGGAGC	CEP55
TTCTAGACCAGTCTGCAACT	CEP57
TTAAGGAAAGGCTTATCCGA	CEP57
TTCGACGCTTGGAACTTGAG	CEP57
TGGCTACCACGGCATGGCTA	CEP57
TAACAAACTTACCACAATGC	CEP57
GAGGAATCAAAGCACAATCA	CEP57
TAAAGCATGCCGAAATGGAG	CEP57
GAAGTCAAAACCACCAGAAA	CEP57
GTTGGATGTGACACATAAGG	CEP63
AAGATCGGTCTGAAATTGAG	CEP63
AAATAGAGCGCCTCACCATG	CEP63
CAATCAGAGATAATTCAGGT	CEP63
CAGAAGGTCCTCACTAGTAT	CEP63
GGAAATCTCCCATCTAACTC	CEP63
TCAAGAAAATCTCATACATG	CEP63
AAAAATATGAAGAACTGAAG	CEP63
ATTTATAAACAGACCAAAGG	CEP70
GTCATTACAGAATCAACTCA	CEP70
TGTCTATCCAAGACGGTATG	CEP70
AGAACAACGAGCTAATGACT	CEP70
ATGTCAACAGAACATGATAC	CEP70
AATGTGCTATTGATGATGCA	CEP70
CAGCAAATATAATCAGCAAC	CEP70
ATTAAGACTTTATAAACAGC	CEP70
GCTTCCGCCACTGTACGGAG	CEP72
AGGAAGCGAAGAATGCCTGT	CEP72
CAGTTGGTACAGTACCAGTG	CEP72
ACTTACCTCCAGACTAACCA	CEP72
GTCAGGCTCAACCTTCACCA	CEP72
CCTCATTGCAGAGTGCGAGT	CEP72
GGGTGTGACCGACACCAGAG	CEP72
TGCCCTCTTTCAAAGAAGCT	CEP72
CTAATATTGATCCAACACGG	CEP76
CAGGGGCTCGTTCATAACCA	CEP76
CAAGTCATAACCCATGCATG	CEP76
CAGGTTTAGAACGAAAACGT	CEP76
GATAACGTTTGATTGAGTGG	CEP76
ACCCTCACACAACTCACGAC	CEP76
AATCCTTGCTGAGACTATAC	CEP76
TTGATTAGCACCATATGAAT	CEP76
TGTAGCGACATACCAATGAG	CEP78
GCACGTTCTGCAGTACGCCA	CEP78
CTGCAAAAGCACATGCACCT	CEP78
AAGAGCTTTACACAACTGGA	CEP78
TCACAGGATGTAATCTGACA	CEP78
AAGCTCTTGATGGAGACCAA	CEP78
AGAACTATAATTCTAGGAAG	CEP78
TTCATCCTCTGAAGTTGAAG	CEP78
TGTCGGCTACACTTGAACAG	CEP85
GTTGTACAGAGTGTTGCCTG	CEP85
TAAAGTAGAAGGCATCACAT	CEP85
GAGAATGTTTCATTGCACCG	CEP85
TTTATCACGACCTTTGACCT	CEP85
AGTTCACAAGATTGCTCTCG	CEP85
TTGAGGGTAGATTCCATGCT	CEP85
CAGTAATGAACACCTTCTGA	CEP85
ATAAGTGAAATTGATAAGGA	CETN2
CTTCAGTAAGCTCAGGCTTA	CETN2
GCTTACTGAAGAGCAAAAGC	CETN2
CGAAAAGATCAAAAGCTTCC	CETN2
CATAGATGTTAAAGAACTGA	CETN2
TAAGTGAAATTGATAAGGAA	CETN2
AACTGTGATGACCCAGAAAA	CETN2
TTCTTAATTTCTTCTTTCTT	CETN2
GATATGAATTATACGAATCG	CFAP206
GTAATCAATATGCTGCATGG	CFAP206
TGTGAGTGAATAAATTACTG	CFAP206
TGTAGAATGAAAGAACACAT	CFAP206
ATATAATATACGACAATATG	CFAP206
AGCTATGTGTTACTCCGCTC	CFAP206
GTTGTCCTGGATCCAAGTAA	CFAP206
ACGAATTCCAGTAACAATCA	CFAP206
ATTACCTATAGTCCGAAACA	CFLAR
TGTGGTTCCACCTAATGTCA	CFLAR
TAATAAATCCAGTTGATCTG	CFLAR
GGCCCATGTAATCCTTCATG	CFLAR
ACACAAAGCTGTCGTAGTCT	CFLAR
CTGAACTGCTCTACAGAGTG	CFLAR
GGTGTCTCGAAGAAGCTCTG	CFLAR
ATCCAGAAGTACAAGCAGTC	CFLAR
ACACCACCTGAAGTGACTCG	CHEK1
TGGTATTGGAATAACTCACA	CHEK1
TGCAGTAAGTACTATTCCAC	CHEK1
GCTGTCAGGAGTATTCTGAC	CHEK1
TTTCTGGAGTACTGTAGTGG	CHEK1
TTGGCTTGGCAACAGTATTT	CHEK1
GGAATGGTAATTCTTGCTGA	CHEK1
TACCTAGAAGCACTGTTTAC	CHEK1
ACTCAAGTCCAACAACTCGA	CHMP2A
GGGCCCTGAACCGTGCCATG	CHMP2A
CAAACTTGCGCACATAGCGC	CHMP2A
CATGGGCACCATGAACAGAC	CHMP2A
GATGGCCAAGCAAGGCCAGA	CHMP2A
ATTGATGCGGGCCAACATCC	CHMP2A
GCGACAGAAACTAGAGACCC	CHMP2A
AGATCATGATGGAGTTTGAG	CHMP2A
CACGGCACCAAAAACAAGCG	CHMP4B
CACCAAAAACAAGCGCGGTG	CHMP4B
TATCAACCATCGAGTTCCAG	CHMP4B
GAACATGGGCTATGCCGCCA	CHMP4B
GGGCGGCCCGACCCCCCAGG	CHMP4B
TGACCAGCAAGAACTTGCAG	CHMP4B
GAAAATCGAGCAGGAGCTGA	CHMP4B
AGAGATGTTAAGCAAGAAAC	CHMP4B
ACGGACAGAGAAGCGCATCG	CHMP7
ACAGCTTCTCTCACGCAAAG	CHMP7
CGCTTTCAAGAGGAGTCGCG	CHMP7
ACTGGAGAGACCTTGGCACG	CHMP7
TGGACTCTTTCTAACATGCT	CHMP7
AGGAGGCCTTTCAGCGCAAG	CHMP7
AGTAGAAGGTCCTCTCATCT	CHMP7
GATCCAGCTGCTGTCTACAC	CHMP7
CTTGGTTGTAGAGTGCACAA	CKAP5
CAGATACATCACGCCAAGCA	CKAP5
TCTTAAAGTGGCTTACCCTG	CKAP5
CCAAGCATTCACAGTCGCTA	CKAP5
CACACTACAGAACATCAGTG	CKAP5
TGCCATGCCAGGCATTAGTG	CKAP5
TGAAGCCAAACTAATTGCTG	CKAP5
GAAAAGGTAGAACTGATACA	CKAP5
ACGACGAGGAGTTTGAGTAT	CKS1B
TTCGGACAAATACGACGACG	CKS1B
CATTATATGATCCATGAACC	CKS1B
TTCAGATTCAGACATCAGAT	CKS1B
CAGTGCACTGACCTGGTTCA	CKS1B
CGCCGGAACAGCAAGATGTG	CKS1B
AGAAACCAAAGAAATGAAGC	CKS1B
ATTCAGATTCAGACATCAGA	CKS1B
GCCTCTACACCTGATAACCG	CLASP1
ACCTACGTGTACTCACCAAG	CLASP1
GACATGTAGGAGAACGTGTG	CLASP1
CTAGATGTGGTACTTCCAGT	CLASP1
GGGAGGCTTGTATCACGTTG	CLASP1
GAGATGCTAAAGACTCTGTG	CLASP1
AGCCAAAGAACACTGAGGTG	CLASP1
TCAAATGGAAAGGAGTCCCT	CLASP1
GAGGACTGCATCTCGCGCGG	CLEC3B
GAGTACCTGCGCCAGAGCGT	CLEC3B
AAAGCATTTCATGTGCACCT	CLEC3B
CTCGTGGAAGGTCTTCGTCT	CLEC3B
CAAGAGCCGTCTGGACACCC	CLEC3B
TGGTGGCTCGGTGGTGACCT	CLEC3B
TGTAAATGCCAAGAAAGGTA	CLEC3B
GGCCCTGCTGAAGGAGCAGC	CLEC3B
AAATAAGTTACACCAAAAGG	CLIP1
CAAATGCAATGAACAAACCA	CLIP1
AAGCCAAGGCCAACGCAGTG	CLIP1
GAAGAAGAATCAATTACCAA	CLIP1
TTTGTAAGGTTGCTGATCGG	CLIP1
AGAGTCCAATAAGCCTGCTG	CLIP1
AGGCAAGAACGATGGTTCGG	CLIP1
GAATCAACAAGACTCTGAAC	CLIP1
GAGGATTCAGATGACTACGA	CLNS1A
TCACACGCTGATTTATCACT	CLNS1A
ATGCATGTAAACTAATGGTG	CLNS1A
GTACCCTTTACATCGCTGAG	CLNS1A
CACTGCAATGTGCGAATGCC	CLNS1A
GGCCAGCGGAGGGGCTCCTG	CLNS1A
AGGGACCGAAGTGACTGTCT	CLNS1A
ACCATACATACCTTCAAATT	CLNS1A
ACCAAAATGATACACCAGAG	CLP1
AAGGTGTGAGGTGAACCGAA	CLP1
CCAGCTCCACATAAGTGGGA	CLP1
CCAAGTGAAAACAGCCACCT	CLP1
GTGTTGAGGTAAAGCAACAT	CLP1
GCAGCACAGTGCGTACAAAG	CLP1
TAGACTTGCCCACATCAGTG	CLP1
GACATCCACCTCAAAAGCTG	CLP1
GTACTCCAGACACTATCCGT	CLTC
GGTCAGCCTTAATTGCAGTG	CLTC
TAATAAGTTCCAGATCACAT	CLTC
GTCCTGGCTAAAGTTAACAA	CLTC
ATGCGAATCAGTCCAGATCA	CLTC
AAGTTGGCACACCACCTACA	CLTC
ATAACTACAGGAAGTCGACT	CLTC
ATCGCCATTCTAGCCTTGCA	CLTC
AATTCAAAATGCTGTCAACG	CLU
AGGTAGTGGTAGGTATCCTG	CLU
GCGTGCGTAGAACTTCATGC	CLU
CTTCCTTGAGATGATACACG	CLU
GGATGCCCTAAATGAGACCA	CLU
CCGCCAACAGAATTCATACG	CLU
CATCAAGCTGCGGACGATGC	CLU
GCTCATTGTCTGAGACCGTC	CLU
TCAAGGATGGAACAAGACCA	CMPK1
CTGGTCGTGTTCGTCCTCGG	CMPK1
GCGCCCGCATCGTCGAGGTG	CMPK1
AGCAGAGGAGAATCGGCCGG	CMPK1
TCAGTTTATTAAAGAGGGTA	CMPK1
GAGAGCTGCTTCGTGATGAA	CMPK1
ATTGAAAAGTACATTAAAGA	CMPK1
AAGAATAAATTCTTGATTGA	CMPK1
TTGGTTAGTAACGTACACAT	CNOT10
CTAGAAAAAATGATTTCACA	CNOT10
TATACAGAAGCCATATCAGT	CNOT10
TGCATGTTCTGGAATAACCT	CNOT10
GCTGCATTGCTGCCAATAAG	CNOT10
TTATATCTTGTAGACAGGCA	CNOT10
GCAAACTCCATACTGGCTAC	CNOT10
TGCAAAATCAAAGATACATC	CNOT10
CCACGTCACGCCAACAACAG	CNOT2
GAATGTTAGTAACCCGACCT	CNOT2
GTGCACTAGGCCTTCCAATG	CNOT2
CATTAGCAGACCGAAACAGG	CNOT2
AGGGCATTGGAATTCCTAGC	CNOT2
ACAGTAAAAGGCTGTCGAGA	CNOT2
ACCAGCAAATGAACAATCCC	CNOT2
AAGACAACTTCAAGTACAGA	CNOT2
TCTTGCGGATGGCGTCAACG	CNOT3
GAGGGACCAAATCAAGACAT	CNOT3
CATCGACACGCTCAACATGC	CNOT3
TGAAGATCTCATCCTCCATG	CNOT3
GACAGTGAAGTCAGCCAGGT	CNOT3
CAGTGCGGCAGCCCCAACGG	CNOT3
CACCACTCCTGGCAACAATG	CNOT3
CCACAACTGAGCTGTAACCT	CNOT3
ATAAACCTACAACAAAGACG	CNOT4
CATGTATCTTCATGAATTGG	CNOT4
TGTGATTGGATGAACTGATG	CNOT4
GTTATATACCTGATGTGAAG	CNOT4
GATATAGGTTACATAAGCAC	CNOT4
AATCTGAAGGTTTGTCAATG	CNOT4
AGTTTATAAACCACTCTCCC	CNOT4
TCGGCAAATCTGGTAGCCAC	CNOT4
AGTACTGCTAGAACTTCGGA	CNOT6
ATTGTCCTAGCTCTAGACTT	CNOT6
TTTGTGATAAATATGCGACC	CNOT6
GTCTGAAGGAATTCGGGACA	CNOT6
TGAATTTAATCAGCTAGCCA	CNOT6
TGTAACATAATCCAAGACCT	CNOT6
TCGGAAACATGGTATCACTC	CNOT6
AAATGGAAAGAAATCCCACT	CNOT6
TATCCAGTTTAAAAAACATG	CNOT7
TGACAGGAAAAAACAATCGA	CNOT7
GGTGTGGTTGCAAGACCCAT	CNOT7
TAGTAGCTCTATAGAGTCCT	CNOT7
ACTTCTTATGACTTCTGGAG	CNOT7
CTGACATTTATGAATGAGCA	CNOT7
ACTATCAATACCAACTATTG	CNOT7
CAGGCAAGTTAGAGTTGGTT	CNOT7
GCTGCTTATGACATCAGGAG	CNOT8
ACTGTAGTCCTGAGTTAGCA	CNOT8
ATTTAGAAATCACTTACGTA	CNOT8
AAGGAGATCTATGGAATCCT	CNOT8
GGTGTTGTGGTGCGACCAAT	CNOT8
CCTTACATTCACAAATGAGA	CNOT8
AGATTCTCGTTTGCCAGAAG	CNOT8
TGTAACTGAGCACGATTTCT	CNOT8
GGTGAGCCGGAGATACTCAA	CNOT9
AAAAGGGGTACAAAAAAAGT	CNOT9
ACCAAATGAATGCCACAGCA	CNOT9
GCTGTCCAGTCCTGAGACTA	CNOT9
AAGATCTTGTTAGATGACAC	CNOT9
AGACTGGTGTGCTGTCAAGG	CNOT9
TGTTTGCGAATTATGGAATC	CNOT9
GCCTACTACACTGGCACAAG	CNOT9
ATGAGACAATGGAACGACAA	CNTRL
CAAACAAACAAGGTTCCTTG	CNTRL
TGTGGCTAGCTTATCAGAGG	CNTRL
AAAAGTAACAAGACTTACCC	CNTRL
AATTCTTGCACGCTCCAAGT	CNTRL
GGTGGCAAGAAATTTAAGGT	CNTRL
ACTTGTAAATAAATTACGCC	CNTRL
GAAAGGCAACAAGATATCAT	CNTRL
ACACTTCCAGTACTCATCCC	COA6
AGGAAAGACAGGTCTGCTGG	COA6
GTGTGACTTACCCACTGTTG	COA6
AGTGTGACTTACCCACTGTT	COA6
AAGTGTGACTTACCCACTGT	COA6
GGAAAGACAGGTCTGCTGGG	COA6
GTGTTTAGATGAGAACTTAG	COA6
AATGGCAGCCCCATCTATGA	COA6
GGCCAGGGACTACTACACAA	COA7
GTGATAGCTGCTACAAACTG	COA7
ATAGCAGCATGTCACAACGT	COA7
CGGCTGGTGGACTATTTGGA	COA7
CTACCACTGCTACCACGAGA	COA7
CGCCATCAAAAAGCACCTGG	COA7
GATGGACAGGTTAATGAGGA	COA7
ACAGTTAAACTTCAACACCT	COA7
CAGCAAATGATGCTTACCCG	COL4A4
GCTGTACTTACCACTAACCC	COL4A4
GCAACGTAACCTACCCTGGG	COL4A4
ACAGGTATGCCATCTAAACC	COL4A4
TTCACAAAAGGGAACACCTG	COL4A4
AAGGCAGAGAGGGACATGCT	COL4A4
CAGGCATGATAGGACCCCCT	COL4A4
CCTGGCAACAAAGGGGCGAA	COL4A4
AGTGCATAAACGAGGCGCAG	COPE
GTAGTCAGCAAACATGCGCA	COPE
ACTGCAGAGGAAGTTCGGTG	COPE
GTCGTGGAGATAGATGGAGG	COPE
GAGAATGCAGGACCTGGACG	COPE
CCTGCGTGCGCTGCACCAGG	COPE
GCTCATCTCTCGGTCCAGCT	COPE
GCAGGGTGGTGAGAAGCTGC	COPE
GTGGTTTAAGACAAACACAA	COPS2
GTGGTGGTAAAATGCACTTG	COPS2
TAGTAACTCCGAGCCAAATG	COPS2
CCAGTTACATCAGTCGTGCC	COPS2
GATTAAGATTAACTTCAAGT	COPS2
TTTAAGCAAGTGGTTCGTCT	COPS2
GGCATTAAGCAGTTTCCAAA	COPS2
ATGTCAGATGGATTTACTGC	COPS2
AGACCCATCGGACTGACAGT	COPZ1
GCTTTGACAGTATACAGGGA	COPZ1
CCTCTTGGAAGGCCTGACAG	COPZ1
TGGCAGCTCCTATGAAAATG	COPZ1
GGTAGGTGTCGTCATAGTAC	COPZ1
CCCCAGTGTCAAGGAGCAAA	COPZ1
ACTCATTGAGCCAGATGCTG	COPZ1
TGTAGAAAAGCGAGCACTGC	COPZ1
CCAAGAAGGCGCGCGATGCG	COX17
CAAGCGCAGCAGGGCTTCAG	COX17
CTTCTCCTGAGACTCAGGCG	COX17
GTCTCCGGGCAAGCGCAGCA	COX17
TTCTTCTCCTGAGACTCAGG	COX17
CCTGAGACTCAGGCGGGGCA	COX17
TCGCGCGCCTTCTTGGTCTC	COX17
GGTCTCCGGGCAAGCGCAGC	COX17
CAGCTATGAGACCATGATCG	CPA1
CCAGCCATCTGGATCGACAC	CPA1
CGTGGTAAGTCTCCGAGCAG	CPA1
TTGCGCCACATGCGATTCTG	CPA1
GGTGGCGTAGTTAAAAGTGT	CPA1
GATCACTCAAGACTACGGGC	CPA1
AGATTGGCAACACCTATGAA	CPA1
GGGCACTCGGACGTCGATGG	CPA1
AATGTCCTGGAAACACTTCG	CPSF2
CAGTTGACTTCAACCACAAG	CPSF2
TGGGGCAGGAAACATAGGAT	CPSF2
GGAAACGTGTGAAGCTTGAA	CPSF2
TGGATATTATTGATTCCCTG	CPSF2
AGCCAACCTGACCTGGAATG	CPSF2
TAATGTCAGTTACAATGTGG	CPSF2
[truncated: 9,334 more rows]
